# Supplementary material for: Cross-Ancestry Comparison of Aptamer and Antibody Proteomics Measures
Source: Research Square preprint supplement (doi:10.21203/rs.3.rs-5968391/v1), 2025-02-12
Supplement: Supplementary file 1 [file 9aa3a2cf7b7a21eb1aa9c0bc.xlsx]

## Sheet: T1.Ancestry_Heterogeneity
Table 1. Characterization of cis-pQTL status for proteins with heterogenous inter-platform correlation estimates by ancestry**
Category		N	cis-pQTL	PAV cis-pQTL	# of Ancestry-differentiated cis-pQTL (X²>75th percentile)	# of Ancestry-differentiated cis-pQTL containing PAV (X²>75th percentile)
All proteins		2157	1237 (57%)	422 (20%)	554 (27%)	118 (5.5%)
Proteins with ancestry-heterogeneous inter-platform correlation estimates	Nominal significance (p<0.05)	611	417 (68%)	149 (24%)	228 (37%)	58 (9.5%)
	Bonferroni significance (p<0.05/2708)	80	69 (86%)	31 (39%)	45 (56%)	13 (16%)
**One probe per UniProt ID included in analysis.
Legend: Counts of proteins with nominal and Bonferroni significant differences in inter-platform correlation estimates across ancestries (rows) and proteins which associate with a cis-pQTL, a cis-pQTL driven by a protein altering variant (PAV), a cis-pQTL with ancestry-differentiated effect allele frequencies, and a PAV-driven cis-pQTL with ancestry-differentiated effect allele frequencies (colum…

## Sheet: T2.pQTL_Ident_Summary
Table 2. Summary of pQTL Signals identified by Platform
		SomaScan	Olink
cis-pQTL	Total N Probes/UniProt IDs Assessedᵃ	2157	2157
	N UniProt IDs with a cis-pQTL Credible Set Containing a Significant (p<5E-08) Variant	840	1036
	Number of credible sets	1476	1779
	Positive Directions of Effect	659	748
	Negative Directions of Effect	817	1031
	Containing PAV ᵇ (for protein-encoding gene)	292	359
	Containing Ancestry-Differentiatedᶜ PAV	74	84
	Containing GTEx cis-eQTL for protein-encoding gene	459	587
	deCODE cis-pQTL in Region	1156	1163
	UKB cis-pQTL in Region	1375	1753
	Containing MS-pQTLᵈ Lead Variant	7	11
	MS-pQTLᵈ in Region	49	78
	Containing MS-PAV ᵉ Lead Variant	3	5
	MS-PAV ᵉ in Region	35	53
	Containing GWAS Catalog Reported Lead Variant	1337	1779
trans-pQTL	N UniProt IDs with a trans-pQTL Credible Set Containing a Significant (p<1E-11) Variant	424	262
	Number of credible sets	529	315
	Positive Directions of Effect	341	182
	Negative Directions of Effect	188	133
	Containing PAV	200	65
	Containing Ancestry-Differentiated Variant	133	97
	Maps to Pleiotropic Region ᶠ	276	158
	Maps to Platform Shared Pleiotropic Region ᵍ	140	151
	Maps to Platform "Specific" Pleiotropic Region ʰ	136	7
	deCODE trans-pQTL in Region	310	139
	UKB trans-pQTL in Region	172	279
	Containing MS-pQTLᵈ Lead Variant	1	1
	MS-pQTLᵈ for Protein Target in Region	4	6
	Containing MS-PAV ᵉ Lead Variant	0	0
	MS-PAV ᵉ for Protein Target in Region	0	0
Legend: cis- and trans-pQTL credible set characteristics and overlap with previously identified expression quantitative trait loci (eQTL), affinity-based pQTL identified in deCODE¹ or UK BioBank⁵, mass-spectrometry based pQTL (MS-pQTL) and PAVs ¹¹,¹⁸, and GWAS catalog variants. Signals identified herein were compared to previously reported signals either with a signal level approach, in which we …
ᵃ Counts correspond to results from one probe per UniProt ID
ᵇ PAV = Protein Altering Variant
ᶜ Ancestry-differentiated = EAF X² value in 75th percentile
ᵈ Plasma mass-spectrometry (MS) pQTL lead variants were obtained from two previous studies published by Suhre et al, using data from Qatar Metabolomics Study of Diabetes (QMDiab) and the Tarkin study. (References 11,18)
ᵉ Plasma MS-PAV lead variants were generated in the QMDiab study by Suhre et al (Reference 11) and are considered most-likely to impact protein measurements rather than circulating protein abundances.
ᶠ Pleiotropic regions are defined as signal regions collectively associated with at least 5 proteins on the platform.
ᵍ Platform-shared pleiotropic regions are defined as platform-overlapping regions associated with at least 5 proteins on both platforms.
ʰ Platform "specific" pleiotropic regions are defined as regions associated with at least 5 proteins on one platform, and 0 or 1 proteins on the other platform..

## Sheet: ST1.Demographics
	Supplemental Table 1. Participant Characteristics (n=1,930, MESA Exam 1)
	Characteristic	Overall	AFR	AMR	EAS	EUR	UNK
	Number of Participants	1930	439	231	277	939	44
	Included in QTL Analyses	1889	433	220	267	932	37
	N Female (%)	1010 (52%)	239 (54%)	125 (54%)	141 (51%)	482 (51%)	23 (52%)
	Age	58.2 (8.8)	57.8 (8.5)	57.9 (8.7)	57.9 (9.0)	58.6 (8.9)	60.1 (9.7)
	BMI (kg/m²)	28.1 (5.4)	30.1 (5.4)	29.7 (5.6)	24.0 (3.0)	27.9 (5.3)	29.0 (5.6)
	eGFR (mL/min/1.73m²)	80.7 (15.8)	87.5 (17.3)	86.5 (15.8)	84.7 (15.8)	78.2 (13.7)	81.4 (18.4)
	Current Smokers (%)	209 (11%)	75 (17%)	31 (13%)	14 (5%)	84 (9%)	5 (11%)
	Type 2 Diabetes Diagnosis	168 (8.7%)	58 (13%)	31 (13%)	25 (9%)	49 (5%)	5 (11%)
	* Ancestry cluster assignment based on similarity to 1000G ancestry cluster (>0.5 similarity to one cluster). Quantitative phenotypes reported as mean (SD).1000G ancenstry groups are: AFR = African. AMR = Admixed American. EAS = East Asian. EUR = European. UNK = Unknown.

## Sheet: ST2.Correlation_Per_Probe
Supplemental Table 2. Protein Correlation Estimates Overall, Per-Ancestry Estimates and Inter-ancestry Heterogeneity for all 2,708 probe pairs
Protein Summary						Pearson's Correlation Across all Participants		Per-Ancestry Correlation and Heterogeneity (SMP-normalized SomaScan vs. Olink)								Per-Ancestry Correlation and Heterogeneity (non-SMP normalized SomaScan vs. Olink)								Previously Reported Protein Measure Correlation
UniProt	Target.Name	Target.Full.Name	SeqId	OlinkID	pair_rank	rho_all_SMP_normalized	rho_all_nonSMP_normalized_SomaScan	Cross_Ancestry_Heterogeneity_p0.05_SMP	Cross_Ancestry_Heterogeneity_pBonferroni_SMP	rho_AFR_SMP	rho_AMR_SMP	rho_EAS_SMP	rho_EUR_SMP	Cross_Ancestry_Q_SMP	p_value_Q_SMP	Cross_Ancestry_Heterogeneity_p0.05_non_SMP	Cross_Ancestry_Heterogeneity_pBonferroni_non_SMP	rho_EAS_non_SMP	rho_EUR_non_SMP	rho_AFR_non_SMP	rho_AMR_non_SMP	Cross_Ancestry_Q_non_SMP	p_value_Q_non_SMP	Fenland_Spearman_Correlation_ANML_SMP_Normalized	Fenland_Spearman_Correlation_non_SMP_Normalized	JHS_Spearman_Correlation_SMP_ANML_Normalized	ARIC_Spearman_Correlation	SeqId_deCODE	OlinkID_deCODE	deCODE_Spearman_Correlation_SMP	deCODE_Spearman_Correlation_non_SMP_normalized
P43320	CRBB2	Beta-crystallin B2	seq.10000.28	OID31081	1	-0.0519691	-0.0308795	N	N	-0.0352845	-0.0482754	0.0109114	-0.0366588	0.58779	0.899222	N	N	0.011513	-0.00795255	0.0411943	-0.0656938	1.82212	0.610133	NA	NA	NA	NA	seq.10000.28	OID31081	-0.0684303	-0.032694
Q14457	BECN1	Beclin-1	seq.10010.10	OID30220	2	-0.32005	0.15156	Y	N	-0.369512	-0.165819	-0.266704	-0.335017	8.63551	0.0345508	N	N	0.235437	0.164786	0.0929441	0.195495	4.03393	0.257823	NA	NA	NA	NA	seq.13032.1	OID30220	-0.0331249	0.318299
Q13490	cIAP-1	Baculoviral IAP repeat-containing protein 2	seq.10046.55	OID21217	2	0.0511776	0.206148	N	N	0.0576168	0.0831566	0.143205	0.0106885	4.15691	0.245012	N	N	0.270832	0.184863	0.239134	0.173906	2.51227	0.473078	0.45	0.602	NA	NA	seq.10046.55	OID21217	0.561062	0.634938
P19878	NCF-2	Neutrophil cytosol factor 2	seq.10047.12	OID20567	1	0.0625576	0.258365	N	N	0.066745	0.00399115	0.00670858	0.073931	1.6318	0.6522	Y	N	0.215037	0.254338	0.354264	0.131162	9.48827	0.0234565	0.288	0.318	NA	0.08	seq.10047.12	OID20567	0.287096	0.363572
P54274	TERF1	Telomeric repeat-binding factor 1	seq.10049.112	OID30480	1	-0.0396732	0.0617689	N	N	-0.0676427	0.0520294	-0.0715631	-0.0448199	2.55578	0.465295	N	N	-0.0623956	0.0810228	0.0715654	0.103355	5.02536	0.169949	NA	NA	NA	NA	seq.10049.112	OID30480	0.0590678	0.103987
Q9NUW8	TYDP1	Tyrosyl-DNA phosphodiesterase 1	seq.10073.22	OID31403	1	0.127463	0.270455	N	N	0.215311	0.108385	0.15461	0.0740741	6.56398	0.0871733	N	N	0.276692	0.229777	0.348227	0.220245	5.56031	0.135075	NA	NA	NA	NA	seq.10073.22	OID31403	0.229035	0.271821
P25440	BRD2	Bromodomain-containing protein 2	seq.10074.128	OID30826	2	-0.0452929	0.0267073	N	N	-0.0529472	-0.0420457	-0.0270456	-0.0416436	0.113964	0.990111	N	N	0.0234688	0.030014	0.00034207	0.0527222	0.465181	0.926472	NA	NA	NA	NA	seq.10074.128, seq.15372.43	OID30826, OID30826	0.017102002, 0.279165341	0.185466558, 0.292048059
O95817	BAG3	BAG family molecular chaperone regulator 3	seq.10078.5	OID20972	1	0.109017	0.130964	N	N	0.0846519	0.16699	0.135795	0.0637111	2.64941	0.448893	N	N	0.0357799	0.12649	0.194919	0.0572281	5.49738	0.138796	NA	NA	NA	NA	seq.10078.5	OID20972	0.127854	0.162506
P07196	NFL	Neurofilament light polypeptide	seq.10082.251	OID20871	1	0.0359537	0.0759534	Y	N	0.0210672	-0.16399	0.0385696	0.0628491	9.6582	0.0217066	Y	N	0.100015	0.0912206	0.0894152	-0.12114	9.21032	0.0266214	0.034	0.082	NA	NA	seq.10082.251	OID20871	0.0572638	0.138368
P35520	CBS	Cystathionine beta-synthase	seq.10086.39	OID30200	1	0.109055	0.116047	N	N	0.149851	0.125113	-0.0201199	0.100879	5.23284	0.15552	N	N	0.0405288	0.129871	0.0815186	0.13398	2.18637	0.534638	NA	NA	NA	NA	seq.10086.39	OID30200	0.123194	0.157328
P07741	APT	Adenine phosphoribosyltransferase	seq.10088.37	OID20927	1	0.759375	0.776547	Y	N	0.81468	0.667096	0.787794	0.734552	21.712	7.48813e-05	Y	N	0.797658	0.759394	0.824927	0.699507	17.0832	0.00067945	NA	NA	NA	NA	seq.10088.37	OID20927	0.640199	0.640983
P09104	NSE	Gamma-enolase	seq.10339.48	OID21046	1	0.561877	0.6605	Y	N	0.641839	0.493201	0.587913	0.518378	12.81	0.00506612	Y	N	0.687238	0.638165	0.716278	0.603129	9.06162	0.0284827	0.403	0.707	0.63	NA	seq.10339.48	OID21046	0.61277	0.736316
Q13651	IL-10 Ra	Interleukin-10 receptor subunit alpha	seq.10344.334	OID20420	3	-0.0022851	0.03881	N	N	-0.00805294	-0.0624646	0.0433802	-0.0131496	1.42185	0.700421	N	N	0.0348792	0.0316594	0.0555777	-0.0253846	0.994084	0.802684	-0.077	0.003	-0.04	-0.05, 0.01	seq.10344.334, seq.8104.21	OID20420, OID20420	-0.001168392, 0.019266435	0.025905591, 0.040634875
P05412	c-Jun	Transcription factor AP-1	seq.10356.21	OID20424	1	-0.0390861	0.00323771	N	N	-0.0117029	-0.111094	-0.0773708	-0.0268803	2.06116	0.55981	N	N	-0.0533368	0.0272564	0.0386171	-0.038898	2.28298	0.515789	0.041	0.095	-0.11	NA	seq.10356.21	OID20424	-0.0535317	-0.000871956
P84022	SMAD3	Mothers against decapentaplegic homolog 3	seq.10363.13	OID31418	1	0.605393	0.617486	N	N	0.576704	0.546405	0.683302	0.593669	7.62685	0.0543873	N	N	0.690585	0.606433	0.588032	0.567071	6.90358	0.0750352	NA	NA	NA	NA	seq.10363.13	OID31418	0.630708	0.693932
Q15796	SMAD2	Mothers against decapentaplegic homolog 2	seq.10364.6	OID31353	1	0.453843	0.463447	Y	N	0.482964	0.434044	0.593886	0.407321	14.0688	0.002813	Y	N	0.603936	0.41994	0.478716	0.440941	13.7718	0.00323286	NA	NA	NA	NA	seq.10364.6	OID31353	0.698235	0.757358
P16234	PDGFRA	Platelet-derived growth factor receptor alpha	seq.10366.11	OID20133	1	0.362847	0.356747	N	N	0.36845	0.328334	0.400418	0.351927	1.02759	0.794577	N	N	0.362171	0.349581	0.407679	0.300148	2.52767	0.470312	0.401	0.357	0.47	NA	seq.10366.11	OID20133	0.440091	0.304624
P29460	IL-12	Interleukin-12	seq.10367.62	OID20666	2	0.0254113	0.123758	N	N	0.0257461	-0.019026	0.0571111	0.0333018	0.765237	0.857762	N	N	0.0905787	0.139452	0.163498	0.129541	0.945643	0.814401	NA	NA	0.83, 0.81, 0.06, 0.06	0.84	seq.10365.132, seq.10365.132, seq.10367.62, seq.13733.5, seq.13733.5	OID20666, OID21327, OID20666, OID20666, OID21327	0.815271018, 0.801409226, 0.005927916, 0.788480068, 0.781104784	0.762666569, 0.763645553, 0.06005671, 0.710967277, 0.715452218
Q9Y5C1	ANGL3	Angiopoietin-related protein 3	seq.10382.1	OID20407	2	0.656904	0.752555	N	N	0.676883	0.617104	0.690632	0.627161	4.55362	0.207557	N	N	0.763284	0.754135	0.746685	0.675497	5.42835	0.142988	NA	NA	0.01	0.71	seq.10391.1	OID20407	0.639935	0.617852
Q9Y5C1	ANGL3	Angiopoietin-related protein 3	seq.10391.1	OID20407	1	0.772454	0.758987	N	N	0.771974	0.729028	0.755815	0.7736	2.1833	0.535245	N	N	0.750533	0.763973	0.755593	0.692086	4.37118	0.224072	0.726	0.732	0.01	0.71	seq.10391.1	OID20407	0.639935	0.617852
Q6ZMJ2	SCAR5	Scavenger receptor class A member 5	seq.10419.1	OID21058	1	0.338359	0.454322	N	N	0.367794	0.357291	0.408171	0.329357	1.94269	0.584387	N	N	0.489036	0.462522	0.464105	0.439216	0.511934	0.916262	0.333	0.562	NA	NA	seq.10419.1	OID21058	0.274545	0.4062
Q9NQX5	NPDC1	Neural proliferation differentiation and control protein 1	seq.10424.31	OID20205	1	0.440651	0.413653	N	N	0.439992	0.343268	0.338392	0.441396	5.17677	0.159302	Y	N	0.310085	0.431333	0.49105	0.330863	10.5535	0.0144025	0.344	0.305	NA	NA	seq.10424.31	OID20205	0.520637	0.430988
P15509	CSF2R	Granulocyte-macrophage colony-stimulating factor receptor subunit alpha	seq.10438.19	OID20915	1	0.571726	0.548444	N	N	0.512181	0.503669	0.619989	0.572958	6.03428	0.109954	N	N	0.573899	0.556209	0.507492	0.481803	3.454	0.326777	0.771	0.72	NA	NA	seq.10438.19	OID20915	0.648364	0.588615
P19961	Alpha-amylase 2B	Alpha-amylase 2B	seq.10439.57	OID20340	2	0.767236	0.804551	N	N	0.77995	0.732007	0.709375	0.77944	7.17809	0.0664331	N	N	0.788297	0.813824	0.810791	0.743345	6.62033	0.0850358	NA	NA	NA	NA	seq.15556.49	OID20340	0.690366	0.7098
Q9H6B4	ACAM:ECD	CXADR-like membrane protein:Extracellular domain	seq.10440.26	OID21419	1	0.590009	0.621023	N	N	0.568739	0.470145	0.560409	0.566066	3.46854	0.324865	N	N	0.562194	0.616492	0.616484	0.521174	4.84011	0.183887	0.582	0.552	NA	NA	seq.10440.26, seq.9585.80	OID21419, OID21419	0.643374658, 0.021698281	0.665310282, 0.112039223
O95445	ApoM	Apolipoprotein M	seq.10445.20	OID20374	1	0.58663	0.564034	N	N	0.632403	0.585544	0.5841	0.529009	7.65472	0.0537135	N	N	0.57114	0.504854	0.603786	0.572286	6.97703	0.0726336	0.598	0.628	0.51	0.68	seq.10445.20	OID20374	0.508423	0.460727
Q6UY09	CEA20	Carcinoembryonic antigen-related cell adhesion molecule 20	seq.10453.7	OID31308	1	-0.0389718	-0.0235143	N	N	-0.0441244	0.0357868	-0.0979665	-0.0427604	2.25043	0.522083	N	N	-0.120356	-0.021296	0.00826308	0.0774365	5.29592	0.151368	NA	NA	NA	NA	seq.10453.7	OID31308	0.0102554	0.0540348
Q6EBC2	IL-31	Interleukin-31	seq.10455.196	OID30487	1	0.00239505	0.0251172	N	N	0.043889	0.0405452	0.0545541	-0.0455498	3.97766	0.263887	N	N	0.00213176	0.00676062	0.0665842	0.0952406	2.2828	0.515825	NA	NA	NA	NA	seq.10455.196	OID30487	0.00504669	0.00184511
O95256	IL-18 Rb	Interleukin-18 receptor accessory protein	seq.10457.3	OID20900	2	-0.00556502	-0.00373951	N	N	-0.0314605	-0.0650466	0.0395673	0.0189917	2.16633	0.538611	N	N	0.0285429	0.0164789	-0.0202385	-0.0302767	0.83517	0.841038	NA	NA	-0.03	NA	seq.2993.1	OID20900	0.0190317	0.0308347
Q13231	Chitotriosidase-1	Chitotriosidase-1	seq.10460.1	OID20312	2	0.806352	0.813741	Y	N	0.809907	0.717748	0.822898	0.766581	12.511	0.00582291	Y	N	0.8228	0.776834	0.821611	0.719844	13.197	0.00422936	NA	NA	0.94	0.92	seq.3600.2	OID20312	0.858976	0.84793
Q9Y5Q6	INSL5	Insulin-like peptide INSL5	seq.10462.14	OID31448	1	0.587599	0.562399	Y	Y	0.449581	0.588527	0.715839	0.611363	30.7735	9.4869e-07	Y	N	0.707525	0.560807	0.496667	0.554015	19.9799	0.00017138	NA	NA	NA	NA	seq.10462.14	OID31448	0.631178	0.485073
P09923	Alkaline phosphatase, intestine	Intestinal-type alkaline phosphatase	seq.10463.23	OID30497	2	0.120083	0.131998	N	N	0.161853	0.131031	0.233092	0.101335	4.22801	0.237873	N	N	0.189844	0.0981995	0.128882	0.161471	2.21985	0.528048	NA	NA	NA	NA	seq.17441.4	OID30497	0.43285	0.380238
Q92956	HVEM	Tumor necrosis factor receptor superfamily member 14	seq.10472.53	OID20783	1	0.0279559	0.183758	N	N	-0.00199736	0.00263811	0.0840877	0.0506653	1.72037	0.632415	N	N	0.198749	0.231743	0.194075	0.138171	1.88042	0.597592	NA	NA	0.09	0.18	seq.5352.11	OID20783	-0.0689244	0.242233
Q03403	Trefoil factor 2	Trefoil factor 2	seq.10473.2	OID20787	2	-0.00194795	0.0422391	N	N	-0.025919	0.091331	0.0160446	-0.00235645	2.20734	0.530505	N	N	0.0681643	0.0371335	0.0337966	0.0820021	0.572243	0.902756	NA	NA	0.83	NA	seq.9191.8	OID20787	0.77677	0.86033
P09238	MMP-10	Stromelysin-2	seq.10479.18	OID20687	2	0.763656	0.795115	Y	N	0.719264	0.800504	0.804273	0.770282	9.34718	0.0250139	N	N	0.825132	0.79465	0.786903	0.79164	2.26369	0.519512	NA	NA	0.72	0.84	seq.8479.4	OID20687	0.757011	0.761643
P13987	CD59	CD59 glycoprotein	seq.10480.33	OID20339	2	-0.0453636	0.0899688	Y	N	-0.0840692	0.149467	-0.129085	-0.0604376	11.5346	0.00916007	N	N	0.00566114	0.0986435	0.088395	0.198071	4.76764	0.189624	NA	NA	0.51	NA	seq.11514.196	OID20339	0.365177	0.540237
Q96A25	T106A	Transmembrane protein 106A	seq.10499.1	OID31411	1	0.384767	0.47453	Y	N	0.350442	0.31372	0.529324	0.377774	11.452	0.00951658	N	N	0.581249	0.464273	0.457184	0.445322	6.67089	0.0831611	NA	NA	NA	NA	seq.10499.1	OID31411	0.513298	0.564777
Q68DV7	RNF43	E3 ubiquitin-protein ligase RNF43	seq.10505.12	OID31291	2	-0.0312723	0.00580755	N	N	0.0090715	-0.158395	0.00591757	-0.00906962	5.11475	0.163585	N	N	0.0200652	0.0359646	0.0585128	-0.128783	5.98115	0.112531	NA	NA	NA	NA	seq.14120.2	OID31291	0.00966566	0.0140621
P26436	sperm protein 10	Acrosomal protein SP-10	seq.10507.166	OID30513	2	-0.0182179	-0.0281925	N	N	-0.0756059	-0.037032	-0.0201546	0.0266151	3.32931	0.343584	N	N	-0.0181329	0.0384981	-0.110273	-0.0852907	7.77242	0.0509568	NA	NA	NA	NA	seq.10507.166, seq.15301.24	OID30513, OID30513	-0.014741501, -0.038451878	-0.010363149, -0.039153779
P12111	Collagen alpha-3(VI):isoform 3	Collagen alpha-3(VI) chain:isoform 3	seq.10511.10	OID20292	2	0.113478	0.149758	N	N	0.0687887	0.132925	0.152283	0.0957629	1.46527	0.690308	N	N	0.18109	0.136629	0.108796	0.16481	1.08377	0.780994	NA	NA	NA	NA	seq.10511.10, seq.11196.31	OID20292, OID20292	0.06825873, 0.685292414	0.118046676, 0.659051068
P32927	IL3RB:ECD	Cytokine receptor common subunit beta:Extracellular domain	seq.10512.13	OID30553	1	0.489583	0.492491	Y	N	0.368872	0.400876	0.275875	0.498875	18.3609	0.000370543	N	N	0.327823	0.474436	0.447391	0.411789	6.84543	0.0769912	NA	NA	NA	NA	seq.10512.13, seq.11137.43	OID30553, OID30553	0.513127152, 0.054669367	0.40638036, 0.060509639
P41222	PGD2 synthase	Prostaglandin-H2 D-isomerase	seq.10514.5	OID20408	1	0.469062	0.542231	N	N	0.466302	0.449606	0.525484	0.445445	2.40777	0.49219	N	N	0.604025	0.536419	0.538472	0.472448	4.40001	0.221384	NA	NA	NA	NA	seq.10514.5	OID20408	0.50829	0.567625
Q9BRK3	MXRA8:ECD	Matrix-remodeling-associated protein 8:Extracellular domain	seq.10521.10	OID30583	1	0.742114	0.725026	N	N	0.727243	0.736284	0.752755	0.743251	0.623906	0.890938	N	N	0.724883	0.710387	0.731034	0.747523	1.40433	0.704521	NA	NA	NA	NA	seq.10521.10	OID30583	0.686055	0.721329
P16444	DPEP1	Dipeptidase 1	seq.10528.2	OID20897	2	0.00866146	-0.0257395	N	N	0.0270199	-0.00375501	0.0899565	-0.00873045	2.21964	0.52809	N	N	0.0288876	-0.0355839	0.0128564	0.00810727	1.3301	0.721998	NA	NA	NA	NA	seq.8794.13	OID20897	0.528569	0.54673
P09874	PARP:BRCT domain	Poly [ADP-ribose] polymerase 1:BRCA1 C-terminal:BRCA1 C-terminus domian	seq.10534.40	OID20500	2	0.219661	0.389108	N	N	0.261037	0.179814	0.249722	0.22606	1.22802	0.746291	Y	N	0.333294	0.423786	0.427946	0.258202	8.55591	0.0358169	0.584	0.707	NA	0.13, 0.33	seq.10534.40, seq.8893.29	OID20500, OID20500	0.390779868, 0.517094262	0.527835421, 0.638097763
Q8TCZ2	C99L2	CD99 antigen-like protein 2	seq.10539.30	OID21122	1	-0.0141008	0.116255	N	N	-0.0344073	-0.0933988	-0.063288	-0.000832995	2.03272	0.565643	N	N	0.106092	0.145277	0.107458	0.0833205	1.03706	0.792286	0.073	0.366	NA	NA	seq.10539.30	OID21122	-0.0298586	0.200563
O43561	LAT	Linker for activation of T-cells family member 1	seq.10551.7	OID20640	1	-0.0512537	0.0371449	N	N	-0.0438713	-0.0185584	0.0169907	-0.0753292	2.06854	0.558303	N	N	0.0990301	0.0188067	0.0472189	0.0674089	1.56281	0.667851	-0.054	0.081	NA	NA	seq.10551.7	OID20640	-0.0676541	0.0524648
P16278	BGAL	Beta-galactosidase	seq.10554.23	OID20949	1	0.194976	0.243243	N	N	0.176465	0.222647	0.166398	0.186573	0.488239	0.921468	N	N	0.229737	0.232554	0.226422	0.259089	0.198384	0.97785	0.085	0.243	NA	NA	seq.10554.23	OID20949	0.115687	0.226888
Q9HC56	PCDH9	Protocadherin-9	seq.10558.26	OID31516	1	0.610181	0.729066	N	N	0.601869	0.686157	0.592862	0.587412	5.25249	0.154215	N	N	0.725038	0.710197	0.717979	0.773974	3.78162	0.286032	NA	NA	NA	NA	seq.10558.26	OID31516	0.521283	0.638387
Q7Z3D4	LYSM3	LysM and putative peptidoglycan-binding domain-containing protein 3	seq.10563.13	OID30950	1	-0.0522338	0.0633631	N	N	-0.0976579	-0.0773662	0.0142929	-0.0390728	2.41976	0.489967	N	N	0.117289	0.107858	0.00381257	0.0461532	3.92318	0.269879	NA	NA	NA	NA	seq.10563.13	OID30950	-0.0906597	0.207452
P61769	b2-Microglobulin	Beta-2-microglobulin	seq.10574.10	OID30725	2	0.0772846	0.126989	N	N	0.123944	0.00356865	0.168553	0.0820968	3.98726	0.262843	N	N	0.199234	0.14073	0.17358	0.0686663	2.58796	0.459604	NA	NA	NA	NA	seq.3485.28	OID30725	0.55375	0.629745
Q6UX71	PXDC2:ECD	Plexin domain-containing protein 2:Extracellular domain	seq.10576.7	OID31101	1	0.291081	0.38614	N	N	0.284351	0.357141	0.434377	0.354747	5.09615	0.164891	N	N	0.50353	0.435402	0.353928	0.432748	5.97861	0.112655	NA	NA	NA	NA	seq.11342.59	OID31101	-0.00230401	0.0233485
O14967	CLGN	Calmegin	seq.10600.24	OID30957	1	0.00767917	0.0349703	N	N	0.0175196	0.00359653	0.0750265	0.0163184	0.885572	0.828908	N	N	0.0883446	0.0383158	0.048112	0.0343057	0.580715	0.900833	NA	NA	NA	NA	seq.10600.24	OID30957	-0.082679	0.0683283
Q5JTV8	TOIP1:Perinuclear	Torsin-1A-interacting protein 1:Perinuclear domain	seq.10606.34	OID30195	1	0.296238	0.399091	N	N	0.228618	0.25681	0.316132	0.277142	1.64795	0.648566	N	N	0.425641	0.383975	0.351265	0.373181	1.32353	0.723554	NA	NA	NA	NA	seq.10606.34, seq.9039.47	OID30195, OID30195	0.024924999, -0.246489026	0.246585252, -0.083922267
Q6P4E1	CASC4	Protein CASC4	seq.10613.33	OID21044	1	0.314168	0.531108	Y	N	0.359878	0.444149	0.330573	0.269581	8.613	0.0349043	N	N	0.530251	0.509132	0.550404	0.557529	1.46112	0.691272	NA	NA	NA	NA	seq.10613.33, seq.8838.10	OID21044, OID21044	0.129458594, 0.138266913	0.399293001, 0.354402193
Q9NZ53	PDXL2	Podocalyxin-like protein 2	seq.10616.67	OID21487	1	-0.00467328	-0.0354475	N	N	-0.00707494	0.0977441	0.0876709	-0.0186427	4.29827	0.231006	N	N	0.0171855	-0.0462293	-0.00417197	0.089508	3.71588	0.293824	-0.009	-0.009	NA	NA	seq.10616.67	OID21487	-0.0128226	-0.0221664
P98164	megalin	Low-density lipoprotein receptor-related protein 2	seq.10618.190	OID30960	1	0.00544142	0.0253145	N	N	0.0541498	-0.0305631	0.0355685	-0.0252359	2.43319	0.487485	N	N	0.0279117	0.00196897	0.0830909	-0.0145269	2.32597	0.507565	NA	NA	NA	NA	seq.10618.190	OID30960	-0.0183413	0.0153374
P08118	PSP-94	Beta-microseminoprotein	seq.10620.21	OID20275	1	0.838403	0.854345	Y	N	0.807656	0.81364	0.888556	0.842597	16.3982	0.000939532	Y	N	0.892527	0.864463	0.820644	0.834795	15.132	0.00170723	0.885	0.933	NA	NA	seq.10620.21	OID20275	0.817295	0.875838
Q8TD46	MO2R1:CD	Cell surface glycoprotein CD200 receptor 1:Isoform 4, Cytoplasmic Domain	seq.10636.1	OID20595	2	0.00781341	0.0616011	N	N	-0.0584865	0.0172945	0.103031	0.0154065	4.4755	0.214486	N	N	0.0785735	0.0658587	0.0349407	0.0410298	0.473734	0.924623	NA	NA	0.36	NA	seq.5103.30	OID20595	0.223104	0.122701
Q12846	STX4	Syntaxin-4	seq.10668.5	OID21326	1	0.678154	0.712775	Y	N	0.740704	0.554171	0.680674	0.65638	17.2803	0.000618858	Y	N	0.707355	0.704896	0.764868	0.59078	16.3288	0.000970858	NA	NA	NA	NA	seq.10668.5	OID21326	0.558465	0.581483
Q07954	LRP1	Prolow-density lipoprotein receptor-related protein 1	seq.10699.52	OID21293	2	0.030349	0.0411659	N	N	-0.055715	-0.0122425	0.110255	0.0837079	7.77078	0.0509943	N	N	0.134078	0.0477854	-0.0169036	-0.0213558	4.77865	0.188742	0.162	0.441	0.31	0.04, 0.04, 0.23	seq.10699.52, seq.8601.167, seq.9182.3	OID21293, OID21293, OID21293	0.082536601, 0.029984059, 0.366467668	0.009376801, -0.008614415, 0.191887378
Q2UY09	COSA1	Collagen alpha-1(XXVIII) chain	seq.10702.1	OID30969	1	0.0321075	0.0478378	N	N	0.037496	0.0259215	-0.0634	0.0405769	2.43311	0.487501	N	N	-0.0117941	0.0411084	0.0602881	0.114204	2.10231	0.551446	NA	NA	NA	NA	seq.10702.1	OID30969	0.08152	0.132184
Q12912	LRMP	Lymphoid-restricted membrane protein	seq.10704.91	OID20085	1	-0.10842	0.0823511	N	N	-0.115946	-0.0846889	-0.0694905	-0.120357	0.713809	0.869951	N	N	0.105014	0.0949409	0.0725164	0.0417717	0.704112	0.872236	-0.101	0.315	NA	NA	seq.10704.91	OID20085	-0.0225614	-0.00277451
P12821	ACE	Angiotensin-converting enzyme	seq.10714.7	OID30696	1	0.601025	0.609489	N	N	0.634745	0.66537	0.553304	0.582192	6.13017	0.105446	Y	N	0.571204	0.567205	0.676123	0.665623	12.5471	0.00572583	NA	NA	NA	NA	seq.10714.7	OID30696	0.601993	0.585938
Q16401	PSMD5	26S proteasome non-ATPase regulatory subunit 5	seq.10716.35	OID30918	1	-0.0199261	0.0180476	N	N	-0.0149012	-0.033677	0.0457217	-0.0353544	1.45582	0.692504	N	N	-0.0198328	0.0377814	-0.00716661	0.0446798	1.19222	0.754872	NA	NA	NA	NA	seq.10716.35	OID30918	-0.0112565	0.0938499
P0DMV8	HSP 70	Heat shock 70 kDa protein 1A	seq.10721.76	OID20718	4	0.139963	0.387013	N	N	0.137965	0.236812	0.0688422	0.156471	3.8144	0.282215	N	N	0.312236	0.426983	0.385492	0.417892	3.99984	0.261481	NA	NA	0.13	NA	seq.4124.24	OID20718	-0.255297	0.238121
P30740	Serpin B1	Leukocyte elastase inhibitor	seq.10737.96	OID21088	1	0.244762	0.43403	N	N	0.30386	0.192759	0.162608	0.275605	5.22342	0.156149	N	N	0.385527	0.457773	0.457082	0.428078	1.85351	0.603361	NA	NA	NA	NA	seq.10737.96	OID21088	0.278947	0.464892
P09603	CSF-1	Macrophage colony-stimulating factor 1	seq.10741.22	OID20719	1	0.332848	0.364475	N	N	0.279233	0.297784	0.262961	0.348318	2.94764	0.399768	N	N	0.274566	0.38772	0.315301	0.35261	4.36674	0.224489	NA	NA	0.19	0.29	seq.3738.54	OID20719	0.116004	0.237111
Q96PX8	SLIK1	SLIT and NTRK-like protein 1	seq.10743.13	OID30510	2	0.117591	0.138465	N	N	0.048257	0.108951	0.0768566	0.146954	3.31173	0.346014	N	N	0.0890602	0.158602	0.0922385	0.11845	1.93224	0.586589	NA	NA	NA	NA	seq.15539.15	OID30510	0.584921	0.58887
Q9UBP4	DKK3	Dickkopf-related protein 3	seq.10746.24	OID20264	2	0.686978	0.75291	N	N	0.668109	0.70767	0.703586	0.664386	2.10595	0.55071	N	N	0.743757	0.746884	0.737865	0.739639	0.139021	0.986775	NA	NA	0.77	NA	seq.3607.71	OID20264	0.680291	0.681729
P0DMV8	HSP 70	Heat shock 70 kDa protein 1A	seq.10749.18	OID20718	6	-0.0441976	0.274628	N	N	-0.0772316	0.112203	-0.049554	-0.0267503	5.68686	0.12788	N	N	0.259337	0.333329	0.257887	0.341919	3.13124	0.37183	NA	NA	0.13	NA	seq.4124.24	OID20718	-0.255297	0.238121
Q8IZP9	GPR64	G-protein coupled receptor 64	seq.10767.52	OID20189	1	-0.0236285	-0.040644	N	N	-0.0929528	0.020378	-0.0344941	0.0148214	3.88346	0.274326	N	N	-0.0615291	-0.050727	-0.0195691	-0.0197081	0.509057	0.916897	0.036	-0.116	NA	NA	seq.10767.52	OID20189	-0.0160246	-0.0299947
Q6UXB4	CLC4G	C-type lectin domain family 4 member G	seq.10781.19	OID20590	1	0.184447	0.263707	N	N	0.237265	0.175586	0.160015	0.151885	2.43612	0.486946	N	N	0.270404	0.227025	0.345262	0.238082	5.13884	0.161908	0.279	0.324	NA	NA	seq.10781.19	OID20590	0.12769	0.172256
Q496F6	CLM2	CMRF35-like molecule 2	seq.10798.4	OID21418	2	-0.0231318	0.147302	N	N	-0.0549305	0.0629446	0.0421961	-0.0728741	5.35052	0.147858	N	N	0.0915931	0.156119	0.0849011	0.236343	4.55121	0.207768	NA	NA	NA	NA	seq.10798.4	OID21418	-0.00300286	0.139034
P50454	Collagen-binding protein	Serpin H1	seq.10800.15	OID31322	1	0.574208	0.604011	N	N	0.562338	0.550477	0.617853	0.561772	1.8745	0.598858	N	N	0.642083	0.587306	0.599691	0.580676	1.82569	0.609361	NA	NA	NA	NA	seq.10800.15	OID31322	0.51518	0.550613
P0DMV8	HSP 70	Heat shock 70 kDa protein 1A	seq.10803.22	OID20718	9	-0.0638275	0.286423	Y	N	-0.131642	0.114899	-0.106621	-0.0179321	10.9132	0.0122047	Y	N	0.248463	0.36255	0.237168	0.371491	8.13352	0.0433314	NA	NA	0.13	NA	seq.4124.24	OID20718	-0.255297	0.238121
Q12918	KLRB1	Killer cell lectin-like receptor subfamily B member 1	seq.10809.14	OID20629	1	0.225059	0.231392	N	N	0.238753	0.198952	0.290843	0.243451	1.22351	0.747372	N	N	0.270613	0.2778	0.229127	0.259339	0.827361	0.842912	NA	NA	NA	NA	seq.10809.14	OID20629	0.31083	0.286105
Q9UKJ1	PILRA isoform FDF03-M14	Paired immunoglobulin-like type 2 receptor alpha isoform FDF03-M14	seq.10816.150	OID21129	2	-0.392792	-0.353135	Y	N	-0.259547	-0.351795	-0.464971	-0.38523	10.5525	0.0144091	Y	N	-0.45018	-0.330723	-0.181948	-0.315661	16.0024	0.00113269	-0.341	-0.277	NA	NA	seq.10816.150, seq.6402.8, seq.8825.4	OID21129, OID21129, OID21129	-0.320049249, -0.315599666, 0.00839302	-0.28648222, -0.279805938, 0.121856014
P17405	ASM	Sphingomyelin phosphodiesterase	seq.10818.36	OID21028	1	0.773489	0.80676	Y	N	0.819024	0.799534	0.754365	0.757185	9.66897	0.0216001	Y	N	0.792684	0.789025	0.856533	0.806066	14.0603	0.00282418	0.889	0.898	NA	NA	seq.10818.36	OID21028	0.792257	0.808828
Q8N0Z9	VSI10	V-set and immunoglobulin domain-containing protein 10	seq.10825.12	OID31400	1	-0.0246147	0.0617129	N	N	0.00821656	-0.10001	-0.0950531	-0.0114642	3.25644	0.353752	N	N	-0.0897562	0.0706098	0.0599998	-0.0403148	7.01746	0.0713434	NA	NA	NA	NA	seq.10825.12	OID31400	0.0498096	0.0200777
O75071	K0494:N-term	EF-hand calcium-binding domain-containing protein 14:N-term	seq.10830.5	OID31460	2	-0.0684806	0.0552789	N	N	-0.11173	0.0147414	-0.0292255	-0.0895594	3.21389	0.359809	N	N	0.0306361	0.0990144	0.0809341	0.0713123	1.02962	0.794085	NA	NA	NA	NA	seq.10830.5	OID31460	0.0127905	0.210116
Q6ZMC9	SIG15	Sialic acid-binding Ig-like lectin 15	seq.10847.1	OID20812	1	0.00521399	0.0235055	N	N	-0.0137989	0.15753	0.0057419	-0.0084029	5.60653	0.132404	N	N	0.00343129	0.0353486	-0.0118321	0.200227	7.61334	0.0547168	NA	NA	NA	NA	seq.10847.1	OID20812	0.0821626	0.0486162
O15031	PLXB2	Plexin-B2	seq.10855.55	OID20317	2	0.118157	0.175993	N	N	0.0533734	0.218105	0.169127	0.111637	5.05343	0.167926	N	N	0.189276	0.167451	0.123043	0.258895	3.09656	0.376976	NA	NA	0.55	0.47	seq.9216.100	OID20317	0.457986	0.537852
Q99650	OSMR	Oncostatin-M-specific receptor subunit beta	seq.10892.8	OID20356	1	-0.017007	0.0635317	N	N	-0.0435436	0.0147643	-0.0246456	-0.0265576	0.513142	0.915995	N	N	-0.0043825	0.0688809	0.0619304	0.0389592	1.22175	0.747792	-0.014	-0.071	NA	0	seq.10892.8	OID20356	0.0261856	0.0467277
O76038	Secretagogin	Secretagogin	seq.10894.25	OID20457	2	0.31668	0.300986	N	N	0.361075	0.367147	0.234142	0.293727	4.5374	0.208978	N	N	0.227079	0.295823	0.329578	0.342099	2.67666	0.444208	NA	NA	NA	NA	seq.15305.7	OID20457	0.527369	0.532791
Q86T26	TM11B	Transmembrane protease serine 11B	seq.10895.28	OID30852	1	-0.0109396	-0.00482704	N	N	0.00265055	-0.0827179	0.0830655	-0.0205594	3.75799	0.28881	N	N	0.0339016	-0.00606349	0.0341544	-0.0611507	1.70222	0.636441	NA	NA	NA	NA	seq.10895.28	OID30852	0.0143099	0.0172112
Q9UNK0	STX8	Syntaxin-8	seq.10903.50	OID20531	1	0.565595	0.596241	Y	N	0.623469	0.562032	0.602121	0.51987	8.25837	0.0409631	N	N	0.634502	0.56592	0.638383	0.612994	5.13625	0.162088	0.502	0.603	NA	0.68	seq.10903.50	OID20531	0.628426	0.668976
P19256	sLFA-3	Lymphocyte function-associated antigen 3	seq.10938.13	OID20716	1	0.0829068	0.0374769	N	N	0.0551738	-0.00741925	0.11341	0.0687599	1.89907	0.593616	N	N	0.0379473	0.0239524	0.092716	-0.0171271	2.19397	0.533137	0.085	0.185	NA	NA	seq.10938.13	OID20716	0.0324568	0.0390947
O43752	Syntaxin-6	Syntaxin-6	seq.10945.11	OID21219	1	0.185565	0.32738	N	N	0.25995	0.0947222	0.266032	0.162824	7.01313	0.0714806	N	N	0.427399	0.318026	0.379013	0.230674	7.5649	0.0559141	0.376	0.553	NA	NA	seq.10945.11	OID21219	0.366492	0.375009
Q8IUN9	CLC10	C-type lectin domain family 10 member A	seq.10955.4	OID20928	1	-0.0194175	-0.00410692	N	N	-0.0095601	-0.0329697	-0.0306493	-0.0373076	0.233755	0.971964	N	N	-0.079378	0.00538095	-0.0172989	-0.0296153	1.57675	0.664673	0.142	0.052	NA	NA	seq.10955.4	OID20928	-0.0186595	0.0767899
P02765	a2-HS-Glycoprotein	Alpha-2-HS-glycoprotein	seq.10966.1	OID30706	2	-0.253522	-0.212975	Y	N	-0.132972	-0.324628	-0.42443	-0.27184	18.2588	0.000388972	Y	N	-0.391162	-0.224887	-0.0948808	-0.286815	18.0731	0.000424844	NA	NA	NA	NA	seq.3581.53	OID30706	0.338501	0.341899
P01236	PRL	Prolactin	seq.10967.12	OID21033	2	0.771002	0.734591	Y	N	0.770125	0.789286	0.837935	0.763452	9.77425	0.0205859	Y	N	0.80483	0.720119	0.733397	0.763267	9.54829	0.0228232	NA	NA	0.85	NA	seq.2585.2	OID21033	0.802205	0.815736
Q13508	NAR3	Ecto-ADP-ribosyltransferase 3	seq.10970.3	OID20346	1	0.810196	0.817241	N	N	0.837725	0.788053	0.810262	0.788185	6.95378	0.0733855	Y	N	0.821204	0.799298	0.855015	0.772242	12.7287	0.00526156	NA	NA	NA	NA	seq.7970.315	OID20346	0.662174	0.68397
P01242	SOM2	Growth hormone variant	seq.10978.39	OID21168	1	0.00822209	0.04778	Y	N	-0.0530795	-0.063718	0.155567	0.0139195	8.90187	0.0306244	N	N	0.126893	0.0727594	-0.0284658	-0.00523396	5.51088	0.137989	0.146	0.135	NA	NA	seq.10978.39	OID21168	0.0227107	0.0280042
P22303	ACES	Acetylcholinesterase	seq.10980.11	OID30585	1	0.634076	0.677009	N	N	0.607465	0.67486	0.675053	0.639377	3.12157	0.373259	N	N	0.710695	0.680532	0.654727	0.720109	3.1653	0.366835	NA	NA	NA	NA	seq.15553.22	OID30585	-0.0593719	0.0820885
P02818	Osteocalcin	Osteocalcin	seq.11067.13	OID30389	1	-0.0125779	0.0127809	N	N	0.0318296	-0.0152828	0.00562208	0.00369907	0.39019	0.942261	N	N	0.0362509	0.0333834	0.0453148	0.0119046	0.16918	0.982404	NA	NA	NA	NA	seq.11067.13	OID30389	-0.0457188	-0.00383864
P05113	IL-5	Interleukin-5	seq.11071.1	OID20472	1	-0.0231504	0.00323426	N	N	-0.0875704	0.0148859	0.041346	-0.0130061	3.35752	0.339717	N	N	0.04218	0.0209611	-0.0677179	-0.0506662	3.43845	0.328833	0.051	0.04	0.01	0.01	seq.11071.1	OID20472	0.0858279	0.0270852
P21695	GPDA	Glycerol-3-phosphate dehydrogenase [NAD(+)], cytoplasmic	seq.11081.1	OID31358	2	0.554947	0.569512	N	N	0.495238	0.606433	0.518679	0.586531	7.04274	0.0705478	N	N	0.538392	0.587816	0.51845	0.623816	5.18314	0.158868	NA	NA	NA	NA	seq.13697.51	OID31358	0.278028	0.320263
P09104	NSE	Gamma-enolase	seq.11083.23	OID21046	2	0.134319	0.293275	N	N	0.0995559	0.133195	0.208648	0.120301	2.30676	0.511227	N	N	0.33558	0.310637	0.230518	0.296206	2.92703	0.403013	NA	NA	0.63	NA	seq.10339.48	OID21046	0.61277	0.736316
Q05315	LPPL	Galectin-10	seq.11094.104	OID20126	1	-0.0482632	0.0537568	N	N	-0.119045	0.0356993	-0.0287081	-0.0339681	4.09864	0.251008	N	N	0.0506475	0.0782819	0.0347488	0.0855088	0.721712	0.868086	NA	NA	-0.02	NA	seq.11094.104	OID20126	0.0277639	0.12625
O00206	TLR4	Toll-like receptor 4	seq.11101.18	OID30428	1	-0.00313886	0.0074928	N	N	-0.0178252	0.0764565	-0.0136545	-0.0148957	1.7013	0.636644	N	N	0.0248633	-0.00416275	-0.00590102	0.0684156	1.13534	0.768551	NA	NA	NA, NA	NA	seq.3647.49, seq.11101.18	OID30428, OID30428	0.104454265, 0.018761656	0.070262679, 0.004349756
Q9BYZ8	REG4	Regenerating islet-derived protein 4	seq.11102.22	OID20784	1	0.728931	0.817581	Y	N	0.742407	0.695124	0.808645	0.711595	13.1029	0.00441918	Y	N	0.864756	0.807653	0.827953	0.795877	9.20754	0.0266551	0.661	0.832	0.79	NA	seq.11102.22	OID20784	0.717624	0.817793
P04792	HSP 27	Heat shock protein beta-1	seq.11103.24	OID20230	1	0.8199	0.828419	Y	N	0.836924	0.745865	0.835029	0.826259	10.7008	0.0134587	Y	N	0.846573	0.833992	0.844253	0.753597	11.7613	0.00824736	-0.481	-0.491	0.59	0.53	seq.11103.24	OID20230	0.496044	0.489562
P36222	YKL-40	Chitinase-3-like protein 1	seq.11104.13	OID20399	1	0.660532	0.67235	Y	Y	0.785922	0.687157	0.647676	0.629475	31.6635	6.16178e-07	Y	Y	0.644303	0.647138	0.801714	0.699595	35.804	8.23787e-08	0.454	0.469	0.83	0.58	seq.11104.13	OID20399	0.507016	0.53839
P06733	Alpha enolase	Alpha-enolase	seq.11105.171	OID21037	1	0.501659	0.532246	N	N	0.460482	0.423254	0.544908	0.511217	4.48559	0.213579	N	N	0.576218	0.545107	0.489402	0.44367	5.80946	0.121258	NA	NA	0.46	NA	seq.11105.171	OID21037	0.66314	0.70569
Q2TAL6	VWC2	Brorin	seq.11121.56	OID20936	1	0.709336	0.786781	N	N	0.688722	0.662985	0.757549	0.687199	5.90817	0.116164	Y	N	0.795211	0.789084	0.779892	0.693315	9.22585	0.0264341	NA	NA	NA	NA	seq.15308.108	OID20936	0.647815	0.768211
P32927	IL3RB:CD	Cytokine receptor common subunit beta:Cytoplasmic domain	seq.11137.43	OID30553	2	0.0752343	0.122484	N	N	0.0037174	0.0324913	-0.00434014	-0.0020334	0.237101	0.971389	N	N	0.0803791	0.0501631	0.120434	0.102693	1.67461	0.642593	NA	NA	NA	NA	seq.10512.13, seq.11137.43	OID30553, OID30553	0.513127152, 0.054669367	0.40638036, 0.060509639
P02452	CO1A1:C-term propeptide	Collagen alpha-1(I) chain:C-term propeptide	seq.11140.56	OID20335	1	0.60091	0.622824	N	N	0.603025	0.65091	0.64254	0.617742	1.30653	0.727584	N	N	0.644774	0.641568	0.631052	0.673201	0.83017	0.842238	0.672	0.72	NA	0.71, -0.06	seq.11140.56, seq.13484.69	OID20335, OID20335	0.641690141, -0.005133315	0.63963756, -0.068744342
O95841	ANGL1:C-term	Angiopoietin-related protein 1:C-Term, Fibrinogen domian	seq.11142.11	OID20211	1	0.590096	0.608088	N	N	0.595815	0.609711	0.546511	0.580406	1.36178	0.714517	N	N	0.571625	0.595288	0.619706	0.598387	0.976064	0.807044	0.569	0.57	NA	NA	seq.11142.11, seq.9092.33	OID20211, OID20211	0.570589683, 0.196209019	0.570265276, 0.184450744
Q30KQ4	DB116	Beta-defensin 116	seq.11144.10	OID30823	1	0.00104589	0.0588115	N	N	0.0330678	-0.0227903	0.0640755	0.00404513	1.23951	0.743546	N	N	0.132479	0.0605746	0.0161561	0.0838079	2.41407	0.491021	NA	NA	NA	NA	seq.11144.10	OID30823	0.00822509	0.0421167
Q6ZVL6	K154L	UPF0606 protein KIAA1549L	seq.11145.72	OID31312	1	0.0205864	0.0289921	Y	N	0.096428	-0.0589082	0.144515	-0.00661274	8.63805	0.0345112	N	N	0.0937146	0.0404026	0.0594549	-0.0312755	2.09408	0.553111	NA	NA	NA	NA	seq.11145.72	OID31312	0.0430354	0.0146842
Q86YW5	TRML1:ITIM	Trem-like transcript 1 protein:immunoreceptor tyrosine-based inhibition motif	seq.11147.17	OID30682	2	0.358125	0.5071	N	N	0.3844	0.272943	0.366325	0.355222	2.44259	0.485755	N	N	0.4886	0.503763	0.547705	0.450279	2.8007	0.423385	NA	NA	NA	NA	seq.11147.17, seq.9329.28	OID30682, OID30682	0.514358475, 0.677908741	0.605355603, 0.699959816
Q15399	TLR1:CD	Toll-like receptor 1:Cytoplasmic domain	seq.11149.3	OID30532	2	-0.0175386	0.123501	N	N	-0.0408139	0.027349	0.0352988	-0.0454525	2.12076	0.547725	N	N	0.0383402	0.0938957	0.11871	0.130631	1.43479	0.697402	NA	NA	NA	NA	seq.11149.3, seq.16324.38	OID30532, OID30532	-0.066657442, 0.136958346	0.039011579, 0.139294192
Q9UKR3	kallikrein 13	Kallikrein-13	seq.11152.46	OID21291	1	0.744194	0.793279	N	N	0.742227	0.745312	0.701129	0.732457	1.52035	0.677581	N	N	0.742602	0.782222	0.809579	0.796476	5.10105	0.164546	0.678	0.896	0.62	NA	seq.11152.46	OID21291	0.788037	0.82517
P0DMV8	HSP 70	Heat shock 70 kDa protein 1A	seq.11157.35	OID20718	1	0.216323	0.471426	Y	N	0.215111	0.194075	0.395016	0.190407	11.2584	0.0104077	N	N	0.556163	0.465398	0.479193	0.377566	6.74113	0.0806229	NA	NA	0.13	NA	seq.4124.24	OID20718	-0.255297	0.238121
Q8N0X7	SPG20	Spartin	seq.11161.5	OID30656	1	0.686732	0.703562	Y	N	0.664379	0.580587	0.725519	0.693869	9.48813	0.023458	Y	N	0.744736	0.712889	0.674685	0.619549	8.68843	0.0337335	NA	NA	NA	NA	seq.11161.5	OID30656	0.652883	0.66809
Q96KG7	MEG10	Multiple epidermal growth factor-like domains protein 10	seq.11168.3	OID20746	1	-0.0350531	-0.000552534	N	N	0.0460498	-0.0420398	-0.0307199	-0.0798596	4.75278	0.190821	Y	N	0.0527145	-0.0857402	0.0989351	-0.00145987	11.6903	0.00852292	NA	NA	NA	NA	seq.11168.3	OID20746	-0.0318359	-0.0305729
Q7Z6M3	MILR1	Allergin-1	seq.11173.29	OID20482	1	-0.0138487	0.0390272	N	N	-0.0382465	-0.0528581	-0.0693039	0.0231163	2.733	0.434648	N	N	-0.0507365	0.0537553	0.0169497	0.0498765	2.48263	0.478438	0.016	-0.009	NA	NA	seq.11173.29	OID20482	-0.0705673	-0.0528426
Q7L5N7	PCAT2	Lysophosphatidylcholine acyltransferase 2	seq.11175.45	OID21290	1	-0.00108986	0.167422	N	N	0.0365003	-0.0877288	-0.0365846	-0.0207475	2.51345	0.472866	N	N	0.117645	0.189109	0.166984	0.106113	2.03874	0.564406	NA	NA	NA	NA	seq.11175.45	OID21290	0.190878	0.32326
P13647	K2C5	Keratin, type II cytoskeletal 5	seq.11177.16	OID20860	1	0.534566	0.521957	Y	N	0.466221	0.437679	0.429452	0.557483	10.4133	0.015361	N	N	0.427979	0.533905	0.468384	0.450296	5.89096	0.117037	NA	NA	NA	NA	seq.11177.16	OID20860	0.401028	0.425361
P10645	CgA	Chromogranin-A	seq.11184.51	OID30403	1	0.798445	0.823959	N	N	0.8095	0.794974	0.764094	0.796688	2.44753	0.484849	N	N	0.792466	0.824129	0.83587	0.818841	2.89607	0.407928	NA	NA	NA	NA	seq.8476.11	OID30403	0.62243	0.821743
Q5QGZ9	CL12A	C-type lectin domain family 12 member A	seq.11187.11	OID30552	1	-0.0266698	0.00952259	Y	N	-0.11747	-0.0380021	0.249521	-0.00882949	24.277	2.18647e-05	Y	N	0.284575	0.0226306	-0.080727	-0.00564288	24.566	1.90273e-05	NA	NA	NA	NA	seq.11187.11	OID30552	-0.128544	-0.0872204
Q9GZM7	TINAL	Tubulointerstitial nephritis antigen-like	seq.11192.168	OID20180	1	0.352181	0.454138	N	N	0.38084	0.377843	0.370446	0.32746	1.52971	0.675429	N	N	0.453024	0.452383	0.458627	0.449759	0.0252153	0.998943	0.34	0.462	NA	NA	seq.11192.168	OID20180	0.267762	0.370998
P20823	HNF1A	Hepatocyte nuclear factor 1-alpha	seq.11193.27	OID30919	1	-0.0279211	-0.0362515	N	N	-0.0015056	-0.0227104	-0.0684303	-0.0197447	0.77954	0.854354	N	N	-0.0559373	-0.0257032	-0.0576262	-0.0299396	0.41394	0.937348	NA	NA	NA	NA	seq.11193.27	OID30919	0.0473061	0.0517061
Q9Y3P8	SIT1	Signaling threshold-regulating transmembrane adapter 1	seq.11194.6	OID20462	1	-0.0555	0.0386384	N	N	-0.0117337	-0.0918238	-0.057204	-0.0789256	1.58741	0.662249	N	N	0.0489813	0.0185939	0.0380152	0.00387447	0.371171	0.946131	-0.019	0.229	NA	NA	seq.11194.6	OID20462	-0.0304168	0.126183
P12111	Collagen alpha-3(VI):BPTI/Kunitz inhibitor	Collagen alpha-3(VI) chain:Bovine pancreatic trypsin inhibitor/Kunitz inhibitor domain, isoform 1	seq.11196.31	OID20292	1	0.735363	0.783369	N	N	0.753995	0.697451	0.730345	0.73224	2.18338	0.53523	Y	N	0.773021	0.773052	0.822028	0.718122	10.9782	0.0118444	NA	NA	NA	NA	seq.10511.10, seq.11196.31	OID20292, OID20292	0.06825873, 0.685292414	0.118046676, 0.659051068
Q9NPY3	C1QR1	Complement component C1q receptor	seq.11200.52	OID20397	2	0.639088	0.692045	N	N	0.651699	0.663972	0.658199	0.609811	2.93898	0.40113	N	N	0.672441	0.665519	0.732466	0.688857	5.3362	0.14877	NA	NA	0.73	0.76	seq.14136.234	OID20397	0.587021	0.614926
P30613	KPYR	Pyruvate kinase PKLR	seq.11203.97	OID20682	1	0.725429	0.764916	N	N	0.752898	0.718088	0.718998	0.715545	2.09972	0.55197	N	N	0.741596	0.764876	0.795679	0.727094	5.1659	0.160045	NA	NA	NA	NA	seq.15607.56	OID20682	0.422069	0.546201
P78310	CXAR	Coxsackievirus and adenovirus receptor	seq.11204.80	OID20561	1	-0.0580826	0.0182222	N	N	-0.154512	-0.00701778	0.000547955	-0.0565635	5.60071	0.132737	N	N	0.0632329	0.0353515	-0.0577157	0.0106137	3.34165	0.341888	0.002	0.085	NA	NA	seq.11204.80	OID20561	-0.109224	-0.0394254
P26010	Integrin beta-7	Integrin beta-7	seq.11205.10	OID21393	1	0.0558531	0.0988761	N	N	0.0536024	0.09324	0.105435	0.0302285	1.62016	0.654828	N	N	0.0860078	0.0870065	0.0485864	0.10647	0.652923	0.884217	0.037	0.028	NA	NA	seq.11205.10	OID21393	-0.00793434	0.0237336
P21757	Macrophage scavenger receptor:CD	Macrophage scavenger receptor types I and II:Cytoplasmic domain	seq.11207.3	OID21063	3	-0.0468468	0.119044	N	N	0.000906654	-0.105093	-0.0705412	-0.0760793	2.36465	0.500248	N	N	0.0540986	0.0913125	0.12443	0.14674	1.43683	0.696926	-0.044	0.098	-0.04	NA	seq.11207.3, seq.15533.97	OID21063, OID21063	-0.063347616, 0.741857787	0.118177679, 0.81688044
Q9UK23	NAGPA	N-acetylglucosamine-1-phosphodiester alpha-N-acetylglucosaminidase	seq.11208.15	OID30643	1	0.436357	0.540326	N	N	0.415682	0.545257	0.427525	0.417587	5.52019	0.137436	Y	N	0.496994	0.524306	0.513097	0.646378	8.07745	0.0444378	NA	NA	NA	NA	seq.11208.15	OID30643	0.231952	0.432472
Q8NBS9	TXND5	Thioredoxin domain-containing protein 5	seq.11212.7	OID21012	1	0.489882	0.601396	N	N	0.510076	0.406455	0.556263	0.477781	5.33414	0.148902	N	N	0.658436	0.594502	0.61451	0.508876	6.83914	0.0772057	0.61	0.616	NA	NA	seq.11212.7	OID21012	0.314231	0.415859
P55291	CAD15:CD	Cadherin-15:Cytoplasmic domain	seq.11215.6	OID21005	1	-0.0821298	-0.0453774	Y	N	-0.0136284	-0.191645	-0.213769	-0.0641552	10.0589	0.0180721	N	N	-0.146399	-0.0277765	0.00641802	-0.127916	5.86123	0.11856	-0.273	-0.154	0.04	NA	seq.11215.6, seq.5410.53	OID21005, OID21005	-0.109167569, -0.110098445	0.018716641, 0.037543283
P51580	TPMT	Thiopurine S-methyltransferase	seq.11218.84	OID21270	1	0.0840327	0.23714	N	N	0.0482572	0.0319656	0.0695883	0.0817908	0.64307	0.886506	N	N	0.215127	0.245253	0.220542	0.136978	2.3437	0.504201	NA	NA	NA	NA	seq.11218.84	OID21270	0.374819	0.420508
Q8TAT2	FGFP3	Fibroblast growth factor-binding protein 3	seq.11219.95	OID31108	1	0.592946	0.637991	N	N	0.568195	0.609476	0.591914	0.605691	1.0994	0.77722	N	N	0.612649	0.643401	0.650073	0.625122	0.843079	0.839138	NA	NA	NA	NA	seq.11219.95	OID31108	0.60366	0.672456
O75460	ERN1	Serine/threonine-protein kinase/endoribonuclease IRE1	seq.11229.16	OID31391	1	0.355468	0.356073	N	N	0.325294	0.308992	0.372078	0.356403	1.00674	0.799621	N	N	0.365962	0.351895	0.329933	0.316482	0.574971	0.902138	NA	NA	NA	NA	seq.11229.16	OID31391	0.288329	0.283495
Q6P4F2	ADXL	Adrenodoxin-like protein, mitochondrial	seq.11231.12	OID30147	1	-0.0842747	0.0468174	N	N	-0.13997	-0.186385	0.0142717	-0.0764187	6.48689	0.090181	N	N	0.0899477	0.0418092	0.0262867	-0.00280359	1.19301	0.75468	NA	NA	NA	NA	seq.11231.12	OID30147	-0.0610422	0.230391
P20061	Holo-TC I	Transcobalamin-1	seq.11232.46	OID30687	1	0.548996	0.583043	Y	N	0.632615	0.474218	0.581022	0.493498	15.2874	0.00158679	Y	N	0.618623	0.511254	0.677477	0.518625	22.8719	4.29427e-05	NA	NA	NA	NA	seq.19614.8	OID30687	0.334694	0.334461
Q15113	PCOC1	Procollagen C-endopeptidase enhancer 1	seq.11237.49	OID20384	1	0.804135	0.804751	Y	N	0.797227	0.731284	0.778287	0.82665	12.9761	0.00468854	Y	N	0.781841	0.825614	0.805568	0.714895	15.1765	0.0016719	0.73	0.754	NA	0.83	seq.11237.49	OID20384	0.684633	0.652835
Q8TDL5	LPLC1	BPI fold-containing family B member 1	seq.11246.3	OID20308	1	0.844039	0.851505	N	N	0.83474	0.827766	0.819471	0.833424	0.505693	0.917639	N	N	0.820322	0.841119	0.854633	0.821155	3.11917	0.373614	NA	NA	NA	NA	seq.15367.38	OID20308	0.843808	0.832197
P10746	HEM4	Uroporphyrinogen-III synthase	seq.11248.43	OID30964	1	0.220564	0.223405	N	N	0.214851	0.153006	0.209893	0.249824	2.03752	0.564655	Y	N	0.19061	0.281575	0.142284	0.142755	8.57727	0.0354727	NA	NA	NA	NA	seq.11248.43	OID30964	0.331064	0.384249
O75427	LRCH4:CH	Leucine-rich repeat and calponin homology domain-containing protein 4:Calponin Homology	seq.11252.30	OID30191	1	0.0402917	0.285568	N	N	-0.0125867	0.0547621	0.152019	0.0537308	4.6282	0.201136	N	N	0.3252	0.320627	0.248724	0.220974	3.57165	0.311587	NA	NA	NA	NA	seq.11252.30	OID30191	0.35636	0.407005
P09417	DHPR	Dihydropteridine reductase	seq.11257.1	OID20174	1	0.819346	0.832218	Y	N	0.858074	0.815471	0.823295	0.784795	15.8148	0.00123755	Y	N	0.833719	0.803444	0.866985	0.809628	14.1565	0.00269967	0.833	0.832	NA	NA	seq.11257.1	OID20174	0.77171	0.786673
P00352	Retinal dehydrogenase 1	Retinal dehydrogenase 1	seq.11265.8	OID21128	1	0.765729	0.796535	N	N	0.758965	0.813223	0.734005	0.757311	5.43289	0.142708	N	N	0.764164	0.78886	0.795114	0.819781	2.88386	0.409881	0.811	0.83	NA	NA	seq.11265.8	OID21128	0.711822	0.736461
Q14242	SELPL:ECD	P-selectin glycoprotein ligand 1:Extracellular domain	seq.11266.8	OID20560	1	-0.0469424	-0.0402489	Y	N	0.0289442	-0.166959	-0.238779	-0.197658	18.8021	0.00030041	Y	N	-0.246698	-0.189109	0.00351752	-0.0748098	15.8489	0.00121782	-0.361	-0.279	NA	-0.13	seq.11266.8	OID20560	-0.354755	-0.285362
Q8WYQ3	CHC10	Coiled-coil-helix-coiled-coil-helix domain-containing protein 10, mitochondrial	seq.11270.17	OID31116	1	0.238066	0.292914	N	N	0.216002	0.167703	0.173333	0.274976	4.14168	0.246566	Y	N	0.174721	0.354774	0.288119	0.204472	10.7897	0.0129192	NA	NA	NA	NA	seq.11270.17	OID31116	0.320723	0.403568
P0CG30	GSTT2	Glutathione S-transferase theta-2B	seq.11273.176	OID31097	1	-0.00750912	0.158345	N	N	-0.0333147	0.0161402	-0.0437618	-0.0131307	0.571559	0.902911	N	N	0.232839	0.133638	0.193063	0.0344335	6.2529	0.0999339	NA	NA	NA	NA	seq.11273.176	OID31097	0.354443	0.377926
Q99259	DCE1	Glutamate decarboxylase 1	seq.11280.6	OID31166	1	-0.0651991	-0.0437971	N	N	0.015244	-0.0948854	-0.125508	-0.0547603	3.90492	0.271916	Y	N	-0.136178	-0.0336129	0.0902698	-0.134173	11.9876	0.00742566	NA	NA	NA	NA	seq.11280.6	OID31166	-0.0260186	-0.0511561
P21757	Macrophage scavenger receptor:ECD	Macrophage scavenger receptor types I and II:Extracellular domain	seq.11282.16	OID21063	2	0.0504742	0.166876	N	N	0.0382552	0.0605953	0.0341753	0.0340647	0.135408	0.987273	N	N	0.113028	0.156278	0.139757	0.176953	0.645775	0.885878	NA	NA	-0.04	NA	seq.11207.3, seq.15533.97	OID21063, OID21063	-0.063347616, 0.741857787	0.118177679, 0.81688044
Q6GTX8	LAIR1	Leukocyte-associated immunoglobulin-like receptor 1	seq.11284.24	OID20737	1	-0.0299066	0.111741	N	N	-0.0447065	-0.068422	-0.0583417	-0.072345	0.241714	0.97059	N	N	0.083022	0.126794	0.0653764	0.130871	1.43786	0.696686	-0.084	0.061	NA	NA	seq.11284.24	OID20737	-0.0874075	0.105767
P28906	CD34	Hematopoietic progenitor cell antigen CD34	seq.11285.8	OID21025	1	-0.0470294	-0.012154	N	N	0.00389533	-0.136285	-0.0989254	-0.0922386	4.03788	0.257403	Y	N	-0.0756486	-0.0717993	0.083239	-0.100619	8.79484	0.0321467	NA	NA	NA	NA	NA	NA	NA	NA
P00167	Cytochrome b5	Cytochrome b5	seq.11287.14	OID31171	1	0.0658084	0.0710712	N	N	0.0563664	0.166418	0.0699199	0.0459218	2.79064	0.425042	N	N	0.0256883	0.0575087	0.0683183	0.203251	4.88502	0.180413	NA	NA	NA	NA	seq.11287.14	OID31171	0.083768	0.0946556
P48730	KC1D	Casein kinase I isoform delta	seq.11289.31	OID30492	1	-0.0431204	0.149713	N	N	-0.0202648	-0.1436	-0.00758559	-0.0254624	3.12192	0.373207	N	N	0.270607	0.160111	0.142239	0.139468	3.74303	0.290583	0.416	0.511	NA	0.03	seq.11289.31	OID30492	0.316196	0.489975
Q6UXK5	LRRN1:CD	Leucine-rich repeat neuronal protein 1:Cytoplasmic domain	seq.11293.14	OID20438	2	-0.00686652	-0.059178	N	N	0.0405343	0.0380703	-0.0466906	-0.0305521	2.39962	0.493705	N	N	0.00787319	-0.106908	-0.0228182	-0.0547697	3.92993	0.26913	-0.016	0.003	NA	NA	seq.11293.14	OID20438	0.0529111	0.0469675
Q04721	NOTC2	Neurogenic locus notch homolog protein 2	seq.11297.54	OID30407	2	-0.0073734	0.0698925	N	N	0.000501595	0.0374245	0.0528527	-0.0134643	1.19578	0.754017	N	N	0.0865568	0.046784	0.0227183	0.101818	1.29813	0.729577	NA	NA	NA	NA	seq.11297.54, seq.5106.52	OID30407, OID30407	0.067021298, 0.025979996	0.036099926, 0.016559126
Q99523	SORT	Sortilin	seq.11300.32	OID20213	1	-0.0893	0.122366	N	N	-0.148278	-0.112947	-0.0797302	-0.0803441	1.56981	0.666254	N	N	0.146025	0.153441	0.0147149	0.0857895	6.3205	0.0970169	0.163	0.407	NA	-0.1	seq.11300.32	OID20213	0.0777037	0.332757
Q92752	TENR	Tenascin-R	seq.11302.237	OID20957	1	0.388773	0.333256	Y	N	0.272923	0.335521	0.344823	0.463041	16.6913	0.000817935	Y	N	0.274415	0.383494	0.249921	0.237692	9.96395	0.018875	0.558	0.326	NA	NA	seq.11302.237	OID20957	0.504437	0.307684
P32926	Desmoglein-3	Desmoglein-3	seq.11310.8	OID21460	2	-0.0735673	-0.0288222	N	N	-0.152195	-0.103677	-0.0136166	-0.0614929	4.00309	0.261131	N	N	-0.0525498	-0.0300301	-8.23523e-05	-0.0907356	1.35135	0.716976	NA	NA	NA	NA	seq.16317.20	OID21460	-0.0728396	-0.0362079
P61457	PHS	Pterin-4-alpha-carbinolamine dehydratase	seq.11313.100	OID30610	1	0.746202	0.75791	N	N	0.716154	0.766853	0.782111	0.735249	4.81263	0.186043	N	N	0.766937	0.749678	0.742169	0.770712	1.02204	0.795919	NA	NA	NA	NA	seq.11313.100	OID30610	0.593587	0.692187
A1KZ92	PXDNL	Peroxidasin-like protein	seq.11324.3	OID31405	1	-0.0142049	0.0126998	N	N	-0.0896038	0.0721124	0.0117089	0.00498948	4.65282	0.199058	N	N	0.0413684	0.019082	-0.0612627	0.112257	4.92513	0.177363	NA	NA	NA	NA	seq.11324.3	OID31405	-0.0331517	0.0383876
Q6UX71	PXDC2:CD	Plexin domain-containing protein 2:Cytoplasmic domain	seq.11342.59	OID31101	2	0.0709597	0.0768173	N	N	0.0450133	0.0883243	-0.0388924	0.0504861	2.35741	0.501612	N	N	-0.00825242	0.0595282	0.0686138	0.106841	1.80794	0.61321	NA	NA	NA	NA	seq.11342.59	OID31101	-0.00230401	0.0233485
P37837	Transaldolase	Transaldolase	seq.11347.9	OID30414	1	0.366499	0.497054	N	N	0.423351	0.361975	0.288211	0.346146	4.43889	0.217806	N	N	0.448212	0.481822	0.532253	0.475619	2.39363	0.494821	NA	NA	NA	NA	seq.11347.9	OID30414	0.380876	0.625158
Q8WZ42	TITIN	Titin	seq.11352.42	OID30108	1	0.2528	0.218351	N	N	0.267815	0.147383	0.242922	0.242241	2.48955	0.477182	N	N	0.208444	0.19803	0.236658	0.183556	0.642236	0.886699	NA	NA	NA	NA	seq.11352.42	OID30108	0.403845	0.280007
Q15796	SMAD2	Mothers against decapentaplegic homolog 2	seq.11353.143	OID31353	2	0.155372	0.246892	Y	N	0.105187	0.0952525	0.313987	0.149928	9.76823	0.0206426	Y	N	0.39482	0.240514	0.194191	0.194545	9.56549	0.0226448	NA	NA	NA	NA	seq.10364.6	OID31353	0.698235	0.757358
Q9NQ66	Phospholipase C-beta-1	1-phosphatidylinositol 4,5-bisphosphate phosphodiesterase beta-1	seq.11354.21	OID30484	1	0.0246902	0.0252216	N	N	0.0120742	0.0558452	-0.0477581	0.0567234	2.62099	0.453822	N	N	-0.0396907	0.0587547	0.0130332	0.0517313	2.32694	0.50738	NA	NA	NA	NA	seq.11354.21	OID30484	-0.0122641	-0.0127976
P19971	TP	Thymidine phosphorylase	seq.11361.73	OID20234	1	0.484113	0.518827	N	N	0.545273	0.423476	0.493478	0.468653	4.76522	0.189819	N	N	0.522119	0.502768	0.573356	0.461386	4.38694	0.222599	0.477	0.486	NA	NA	seq.11361.73	OID20234	0.376852	0.457381
P54819	KAD2	Adenylate kinase 2, mitochondrial	seq.11368.32	OID31142	1	0.723612	0.74202	N	N	0.723863	0.704814	0.735431	0.712733	0.710295	0.87078	N	N	0.765425	0.729606	0.740102	0.730922	1.46346	0.690728	NA	NA	NA	NA	seq.11368.32	OID31142	0.626581	0.714771
Q96P66	GP101	Probable G-protein coupled receptor 101	seq.11371.1	OID30819	2	-0.0394772	-0.0157676	N	N	-0.0840901	-0.0634233	0.0118883	-0.0376956	1.68699	0.63983	N	N	0.0231913	0.000672241	-0.0875929	-0.0330686	2.95453	0.398689	NA	NA	NA	NA	seq.11371.1	OID30819	0.0111245	0.00904033
Q14508	HE4	WAP four-disulfide core domain protein 2	seq.11388.75	OID21505	1	0.69237	0.7742	N	N	0.664725	0.6731	0.705188	0.693905	1.38882	0.708157	N	N	0.757639	0.785592	0.758497	0.751254	2.46221	0.48216	0.556	0.792	NA	NA	seq.11388.75	OID21505	0.770823	0.825322
P35219	Carbonic Anhydrase VIII	Carbonic anhydrase-related protein	seq.11390.24	OID30482	1	-0.00543629	-0.0305661	N	N	-0.0166905	0.0518496	0.0348259	-0.018997	1.39875	0.705827	N	N	-0.058717	-0.0555563	-0.0077793	0.0811837	3.87842	0.274895	NA	NA	NA	NA	seq.11390.24	OID30482	-0.00567212	-0.00764595
Q03426	MVK	Mevalonate kinase	seq.11391.69	OID20459	1	0.137662	0.277898	N	N	0.0630875	0.0639416	0.167589	0.169195	4.90901	0.178582	N	N	0.323009	0.309562	0.193765	0.211047	6.37408	0.0947631	0.466	0.589	NA	0.29	seq.11391.69	OID20459	0.338003	0.472006
Q9NRY6	PLS3	Phospholipid scramblase 3	seq.11407.57	OID31146	1	-0.1369	0.238236	N	N	-0.193056	-0.14866	-0.0786847	-0.126487	2.54106	0.467916	N	N	0.236298	0.282921	0.177548	0.177751	4.8181	0.185612	NA	NA	NA	NA	seq.11407.57	OID31146	-0.169799	0.169444
O60828	PQBP1	Polyglutamine-binding protein 1	seq.11432.11	OID21172	1	0.0569758	0.212817	N	N	0.0877072	0.122174	0.0837463	0.0263841	2.45208	0.484014	N	N	0.144274	0.217207	0.290579	0.219261	4.14018	0.246719	NA	NA	NA	NA	seq.11432.11	OID21172	0.363679	0.40446
P25686	DNJB2	DnaJ homolog subfamily B member 2	seq.11438.6	OID30661	1	0.656347	0.661613	N	N	0.650792	0.604934	0.704012	0.65051	3.92421	0.269766	N	N	0.703197	0.656909	0.646052	0.633006	2.55544	0.465356	NA	NA	NA	NA	seq.11438.6	OID30661	0.654253	0.690754
Q8NFT8	DNER:CD	Delta and Notch-like epidermal growth factor-related receptor:Cytoplasmic domain	seq.11442.1	OID20712	2	-0.0065104	-0.010197	N	N	0.0270695	0.0700565	-0.0509203	0.00374128	2.00662	0.571034	N	N	-0.06258	-0.0697406	0.0516994	0.0170417	5.19706	0.157923	0.044	0.086	NA	0.03, 0.65	seq.11442.1, seq.9769.48	OID20712, OID20712	0.016891465, 0.481749022	0.016020101, 0.532991591
P07237	Protein disulfide-isomerase	Protein disulfide-isomerase	seq.11450.110	OID21509	1	0.33689	0.498338	Y	N	0.415376	0.297807	0.212502	0.338706	9.0505	0.0286269	N	N	0.398493	0.515029	0.527759	0.442217	6.56962	0.0869568	NA	NA	0.17	NA	seq.4278.14	OID21509	-0.111357	0.338167
Q01201	RELB	Transcription factor RelB	seq.11464.9	OID30463	1	-0.0166651	-0.0365038	N	N	-0.0423441	-0.0739892	0.108691	-0.0332511	5.61859	0.131715	N	N	0.0789498	-0.0603717	-0.0347944	-0.0767716	4.57263	0.205903	NA	NA	NA	NA	seq.11464.9	OID30463	0.0521893	0.0899492
Q9Y4C8	RBM19	Probable RNA-binding protein 19	seq.11468.15	OID30090	1	0.00318621	0.0842646	N	N	0.0675342	-0.0548898	-0.00160272	0.0174227	2.39259	0.495016	N	N	0.0374711	0.104663	0.149103	0.0265601	3.39575	0.334536	NA	NA	NA	NA	seq.11468.15	OID30090	0.0984601	0.156703
P30838	Aldehyde dehydrogenase, class 3	Aldehyde dehydrogenase, dimeric NADP-preferring	seq.11480.1	OID20512	1	0.226304	0.231183	N	N	0.216342	0.346939	0.267867	0.196756	5.39364	0.14514	N	N	0.35931	0.202639	0.225519	0.305815	7.38553	0.0605737	0.302	0.272	NA	0.33	seq.11480.1	OID20512	0.25847	0.21752
Q8TDQ0	TIMD3	Hepatitis A virus cellular receptor 2	seq.11481.25	OID21137	3	-0.0371749	0.0132351	N	N	-0.0342809	-0.0208974	0.0103438	-0.0358917	0.488052	0.921508	N	N	0.0303191	0.0334032	0.000242116	0.0460337	0.436528	0.932597	-0.135	-0.097	0.76	NA	seq.11481.25, seq.5134.52	OID21137, OID21137	-0.094765523, 0.565816807	-0.033925481, 0.538865511
Q15697	ZN174	Zinc finger protein 174	seq.11486.26	OID30508	1	-0.0769514	0.0193517	N	N	-0.0964944	-0.151753	-0.0541365	-0.0463644	2.4619	0.482216	N	N	-0.0239599	0.0551915	0.0141509	-0.0807244	4.01731	0.259601	NA	NA	NA	NA	seq.11486.26	OID30508	0.0207863	0.0876342
Q08629	Testican-1	Testican-1	seq.11487.4	OID20924	1	0.139187	0.12218	N	N	0.137685	0.114993	0.246146	0.105514	4.58918	0.204472	N	N	0.235381	0.0822504	0.101285	0.0725111	5.67886	0.128324	NA	NA	-0.01	NA	seq.5490.53	OID20924	-0.0805307	-0.00303875
O14791	Apo L1	Apolipoprotein L1	seq.11510.31	OID30708	1	0.542638	0.527378	Y	Y	0.328688	0.538099	0.580076	0.551439	27.5374	4.54177e-06	Y	N	0.546646	0.526272	0.340149	0.524146	18.777	0.000304013	NA	NA	NA	NA	seq.11510.31, seq.9506.10	OID30708, OID30708	0.686553924, 0.08958452	0.665520218, 0.153975733
O14791	Apo L1	Apolipoprotein L1	seq.11510.51	OID30708	2	0.392671	0.407327	Y	Y	0.169021	0.460016	0.5591	0.465127	46.2106	5.11589e-10	Y	Y	0.548341	0.464473	0.196054	0.464881	38.3809	2.34744e-08	NA	NA	NA	NA	seq.11510.31, seq.9506.10	OID30708, OID30708	0.686553924, 0.08958452	0.665520218, 0.153975733
P28907	CD38	ADP-ribosyl cyclase/cyclic ADP-ribose hydrolase 1	seq.11513.92	OID21316	2	-0.0882045	0.0190493	N	N	-0.0903229	-0.0362051	0.0070836	-0.0898865	2.45144	0.484131	N	N	0.0780402	0.0529216	0.00364277	0.0105294	1.33164	0.721634	0.054	0.243	0.01	NA	seq.11513.92	OID21316	-0.0330419	0.0645336
P13987	CD59	CD59 glycoprotein	seq.11514.196	OID20339	1	0.438712	0.663038	N	N	0.446246	0.44271	0.458883	0.396853	1.96065	0.580615	N	N	0.675633	0.669272	0.637933	0.585421	4.27228	0.233525	0.05	0.357	0.51	NA	seq.11514.196	OID20339	0.365177	0.540237
P07148	FABPL	Fatty acid-binding protein, liver	seq.11516.7	OID20778	1	0.647553	0.686318	N	N	0.633154	0.650223	0.72307	0.6409	5.79548	0.121996	N	N	0.75358	0.679075	0.663763	0.680875	6.31789	0.0971278	NA	NA	0.72	NA	seq.11516.7	OID20778	0.576139	0.487566
P08397	HEM3	Porphobilinogen deaminase	seq.11530.37	OID21385	1	0.772581	0.805728	N	N	0.782617	0.789248	0.799257	0.759399	2.93296	0.402078	N	N	0.816608	0.803198	0.811798	0.801807	0.460603	0.927458	NA	NA	NA	NA	seq.11530.37	OID21385	0.742896	0.851085
Q9H7M9	GI24:CD	V-type immunoglobulin domain-containing suppressor of T-cell activation:Cytoplasmic domain	seq.11531.24	OID20131	1	0.558746	0.596174	N	N	0.584779	0.499606	0.63247	0.535365	6.82807	0.0775845	N	N	0.652738	0.578038	0.616019	0.54543	4.79489	0.187447	NA	NA	0.36	NA	seq.11531.24, seq.14123.34	OID20131, OID20131	0.242114994, 0.238590219	0.316288264, 0.369183745
O43524	FOXO3A	Forkhead box protein O3	seq.11540.37	OID21271	1	0.264378	0.28587	N	N	0.339721	0.241185	0.318513	0.225983	5.62492	0.131355	N	N	0.338334	0.254433	0.349957	0.294037	4.07958	0.252998	NA	NA	NA	NA	seq.11540.37	OID21271	0.511864	0.578584
Q92956	HVEM	Tumor necrosis factor receptor superfamily member 14	seq.11545.9	OID20783	3	-0.0982003	0.122917	Y	N	-0.149784	-0.242268	-0.072284	-0.0325934	10.4113	0.0153751	Y	N	0.130896	0.197679	0.109405	-0.00411924	8.52086	0.0363887	NA	NA	0.09	0.18	seq.5352.11	OID20783	-0.0689244	0.242233
P30304	MPIP1	M-phase inducer phosphatase 1	seq.11548.84	OID31189	1	0.0118839	0.00372423	N	N	0.0589206	0.123886	-0.00897913	-0.0280162	5.46499	0.140748	N	N	-0.0441332	-0.0130099	0.0436053	0.111359	4.15524	0.245181	NA	NA	NA	NA	seq.11548.84	OID31189	0.031333	0.0100965
Q96C24	SYTL4:C2 2	Synaptotagmin-like protein 4:Ca2+-dependent membrane-targeting module 2	seq.11563.51	OID30339	2	0.0810719	0.283533	N	N	-0.0181165	0.0697216	0.0492429	0.113127	5.2776	0.152563	N	N	0.258384	0.303246	0.243304	0.259014	1.5336	0.674537	NA	NA	NA	NA	seq.11563.51, seq.9090.9	OID30339, OID30339	0.135363772, 0.455398635	0.219405564, 0.485029805
P68106	FKB1B	Peptidyl-prolyl cis-trans isomerase FKBP1B	seq.11568.2	OID20618	1	0.5467	0.587427	N	N	0.573813	0.4704	0.591015	0.510877	5.94916	0.11411	N	N	0.63657	0.559964	0.611288	0.504812	6.64165	0.0842405	0.762	0.792	NA	0.81	seq.11568.2	OID20618	0.753598	0.767763
O60884	DNJA2	DnaJ homolog subfamily A member 2	seq.11582.63	OID20627	1	0.633921	0.679138	Y	N	0.652157	0.532567	0.732112	0.593513	18.6627	0.000320999	Y	N	0.748184	0.660624	0.693002	0.607994	10.1638	0.0172241	NA	NA	NA	NA	seq.11582.63	OID20627	0.551253	0.601262
Q6UXK5	LRRN1:ECD	Leucine-rich repeat neuronal protein 1:Extracellular domain	seq.11586.2	OID20438	1	0.142605	0.0260518	N	N	0.143883	0.222295	0.0826592	0.127678	2.70859	0.438769	N	N	0.0884265	-0.00540835	0.0237724	0.00856605	1.91315	0.590627	NA	NA	NA	NA	seq.11293.14	OID20438	0.0529111	0.0469675
O43663	PRC1	Protein regulator of cytokinesis 1	seq.11591.43	OID31345	2	-0.00970303	-0.000672136	N	N	0.0356925	-8.99246e-05	-0.0107838	-0.0285454	1.24431	0.742398	N	N	-0.00661189	0.0130697	-0.00272167	-0.00268017	0.137058	0.987046	NA	NA	NA	NA	seq.11591.43, seq.15310.61	OID31345, OID31345	0.035539202, 0.082324983	0.160647515, 0.140493807
Q07325	MIG	C-X-C motif chemokine 9	seq.11593.21	OID20675	2	-0.0623611	0.0994608	N	N	-0.0114262	-0.14465	-0.0587631	-0.085175	3.05208	0.383666	N	N	0.0660359	0.0996231	0.145616	0.0629324	1.57177	0.665809	-0.178	0.061	0.61	-0.03, 0.74	seq.11593.21, seq.9188.119	OID20675, OID20675	-0.138482031, 0.705684922	0.096467209, 0.665870642
P51815	ZN75D	Zinc finger protein 75D	seq.11596.47	OID31303	1	0.00224506	0.000518289	N	N	-0.00354155	-0.0139884	0.025165	-0.00309408	0.232353	0.972205	N	N	-0.0432606	0.0277564	-0.0247815	0.0168648	1.54024	0.673014	NA	NA	NA	NA	seq.11596.47	OID31303	-0.0264855	0.0206281
O75190	DNJB6	DnaJ homolog subfamily B member 6	seq.11606.22	OID30613	1	0.551219	0.600529	N	N	0.53805	0.485165	0.628953	0.531981	6.37987	0.0945224	N	N	0.665501	0.597123	0.588615	0.554037	4.51899	0.210603	NA	NA	NA	NA	seq.11606.22	OID30613	0.566745	0.627328
O95696	BRD1	Bromodomain-containing protein 1	seq.11607.15	OID31259	1	0.011018	-0.00460822	N	N	0.0328053	0.0373982	0.0892742	-0.0470876	5.05691	0.167677	N	N	0.0474598	-0.0507299	0.014529	0.105278	5.66006	0.129373	NA	NA	NA	NA	seq.11607.15	OID31259	0.0048412	0.0190108
Q9UN19	DAPP1	Dual adapter for phosphotyrosine and 3-phosphotyrosine and 3-phosphoinositide	seq.11615.16	OID20524	1	0.792986	0.807771	N	N	0.788646	0.765701	0.779274	0.796284	1.32314	0.723645	N	N	0.803114	0.812639	0.801886	0.768146	2.6138	0.455075	0.172	0.309	NA	NA	seq.11615.16	OID20524	0.592096	0.73707
P20701	LFA-1 alpha-L chain	Integrin alpha-L	seq.11617.1	OID30537	1	-0.0399307	0.0737345	N	N	-0.0584275	0.0312539	-0.0796185	-0.0350222	1.76187	0.623268	Y	N	-0.0452045	0.0702058	0.0445081	0.206911	8.32786	0.0397003	NA	NA	NA	NA	seq.11617.1	OID30537	0.0655256	0.180714
O95433	AHSA1	Activator of 90 kDa heat shock protein ATPase homolog 1	seq.11633.89	OID31379	1	0.270644	0.286731	N	N	0.269902	0.205864	0.247211	0.29035	1.67343	0.642857	N	N	0.292749	0.288629	0.30593	0.24092	0.760514	0.858886	NA	NA	NA	NA	seq.11633.89	OID31379	0.649007	0.652586
O43665	RGS10	Regulator of G-protein signaling 10	seq.11634.32	OID30999	1	0.74008	0.757973	Y	N	0.752284	0.614536	0.796599	0.733604	18.1665	0.000406404	Y	N	0.810819	0.75231	0.767269	0.638805	18.0337	0.000432861	NA	NA	NA	NA	seq.11634.32	OID30999	0.714382	0.818997
Q9ULW2	Frizzled-10:CD	Frizzled-10:Cytoplasmic domain	seq.11647.6	OID30931	2	-0.0298271	-0.0125428	Y	N	0.0675424	-0.157955	-0.0560389	-0.0335093	8.16274	0.0427655	N	N	-0.0355851	-0.0272247	0.0957053	-0.100955	7.25414	0.0642238	NA	NA	NA	NA	seq.11647.6	OID30931	0.00456905	0.0396502
Q14677	EPN4	Clathrin interactor 1	seq.11659.31	OID31182	1	0.0553635	0.0458084	N	N	-0.00391509	0.0368495	0.0867103	0.0543903	1.61913	0.65506	N	N	0.0719891	0.0493119	-0.0111308	0.0142507	1.59539	0.660435	NA	NA	NA	NA	seq.11659.31	OID31182	0.0642908	0.0688323
P57771	RGS8	Regulator of G-protein signaling 8	seq.11666.72	OID20454	1	-0.00335906	-0.00681944	N	N	0.0448382	-0.0213725	0.00197958	-0.0325634	1.85196	0.603694	N	N	-0.0213107	-0.023794	0.0280261	-0.0100299	0.843809	0.838962	0.017	0.024	NA	NA	seq.11666.72	OID20454	-0.0761183	-0.0452997
Q96P66	GP101	Probable G-protein coupled receptor 101	seq.11670.18	OID30819	1	-0.0128084	0.00742365	N	N	-0.00341151	0.0263322	-0.0708832	-0.00339253	1.38028	0.710164	N	N	-0.0451759	0.0311647	-0.0273613	0.040155	2.05933	0.560185	NA	NA	NA	NA	seq.11371.1	OID30819	0.0111245	0.00904033
P08581	Met	Hepatocyte growth factor receptor	seq.11814.29	OID20269	2	0.535289	0.601629	N	N	0.530949	0.582983	0.578932	0.525794	2.20153	0.531648	N	N	0.649693	0.574549	0.651689	0.585257	6.34167	0.09612	NA	NA	0.61	0.5	seq.2837.3	OID20269	0.510325	0.482399
Q16595	FRDA	Frataxin, mitochondrial	seq.11833.83	OID21442	1	0.296394	0.487973	Y	N	0.266113	0.187423	0.438947	0.288521	11.0895	0.0112517	N	N	0.567131	0.493161	0.488996	0.397449	6.18403	0.102992	NA	NA	NA	NA	seq.15389.1	OID21442	-0.181847	0.352066
Q08345	discoidin domain receptor 1	Epithelial discoidin domain-containing receptor 1	seq.11836.144	OID21009	1	0.530052	0.603856	N	N	0.527708	0.542266	0.577667	0.524881	1.30019	0.729088	N	N	0.639661	0.576897	0.655014	0.586057	5.81583	0.120923	NA	NA	-0.01	NA	seq.4122.12	OID21009	-0.0699716	-0.00988587
Q9NZC2	TREM2	Triggering receptor expressed on myeloid cells 2	seq.11851.21	OID20731	2	0.795418	0.804035	N	N	0.811811	0.785695	0.769589	0.795029	2.29474	0.51353	N	N	0.772664	0.797588	0.83397	0.787382	6.22511	0.101157	NA	NA	NA	NA	seq.16300.4	OID20731	0.767444	0.817292
P01133	EGF:CD	Epidermal growth factor:Cytoplasmic domain	seq.11949.25	OID20698	2	0.126696	0.385031	N	N	0.0499878	0.113907	0.188213	0.143377	4.00186	0.261263	N	N	0.42994	0.414317	0.332668	0.355155	3.68803	0.297181	NA	NA	0.17	NA	seq.5509.7	OID20698	0.606326	0.640253
Q8IVU1	IGDC3:CD	Immunoglobulin superfamily DCC subclass member 3:Cytoplasmic domain	seq.11952.1	OID30862	1	0.0240096	0.0545168	N	N	0.067482	0.0376732	0.0821572	-0.0302088	4.46987	0.214994	N	N	0.117131	0.0244363	0.0676	0.060828	2.01753	0.568775	NA	NA	NA	NA	seq.11952.1, seq.7118.24	OID30862, OID30862	-0.006845988, 0.006983452	0.006380166, 0.012604661
Q07960	RHG01:Rho-GAP	Rho GTPase-activating protein 1:Rho-GTPase activating protein domain	seq.11955.1	OID21202	2	0.342493	0.446552	N	N	0.371387	0.270777	0.336565	0.331245	1.91143	0.590992	N	N	0.439146	0.436078	0.478249	0.395621	1.69793	0.637394	0.522	0.686	NA	NA	seq.11955.1, seq.9815.5	OID21202, OID21202	0.438498432, 0.472912952	0.526686376, 0.558112861
Q9HD43	PTPRH	Receptor-type tyrosine-protein phosphatase H	seq.11988.24	OID31433	1	-0.0386404	-0.0342177	N	N	-0.00644591	0.0257271	-0.0134572	-0.0738982	2.73965	0.433531	N	N	0.013249	-0.0756206	0.010916	0.044224	4.45231	0.216584	NA	NA	NA	NA	seq.11988.24	OID31433	-0.00790681	-0.0217281
P09564	CD7	T-cell antigen CD7	seq.12008.3	OID30543	1	0.420976	0.488063	N	N	0.462679	0.498076	0.354173	0.393341	6.04733	0.10933	N	N	0.372629	0.495753	0.526184	0.523958	7.29644	0.063026	NA	NA	NA	NA	seq.12008.3	OID30543	0.214242	0.300165
Q03393	PTPS	6-pyruvoyl tetrahydrobiopterin synthase	seq.12014.19	OID20847	1	0.00341092	0.138842	N	N	-0.0182976	-0.0223728	-0.0153559	0.0479978	2.07584	0.556817	Y	N	0.151614	0.200706	-0.0277862	0.135563	16.0282	0.00111897	0.084	0.189	NA	NA	seq.12014.19	OID20847	0.108351	0.209683
Q9H3S4	TPK1	Thiamin pyrophosphokinase 1	seq.12018.84	OID30338	1	-0.0627869	0.124531	N	N	-0.101808	-0.0745921	0.00891796	-0.0567346	2.13555	0.544754	N	N	0.163264	0.129483	0.160894	0.11012	0.671499	0.879886	NA	NA	NA	NA	seq.12018.84	OID30338	0.314285	0.378369
O14793	Myostatin	Growth/differentiation factor 8	seq.12077.32	OID20115	1	0.607896	0.603137	N	N	0.609659	0.623666	0.592336	0.566372	2.21863	0.528288	Y	N	0.610222	0.551415	0.650552	0.563566	7.87337	0.0487026	NA	NA	0.71, 0.66	NA	seq.2765.4, seq.14583.49	OID20115, OID20115	0.612007151, 0.266907896	0.601574147, 0.250945648
P34896	cSHMT	Serine hydroxymethyltransferase, cytosolic	seq.12334.25	OID20714	1	0.77905	0.800017	Y	Y	0.847065	0.694659	0.817862	0.744588	35.2995	1.05308e-07	Y	Y	0.838026	0.772739	0.855529	0.706481	33.107	3.05757e-07	NA	NA	NA	NA	seq.12334.25	OID20714	0.7254	0.782358
Q63HQ2	EGFLA	Pikachurin	seq.12338.27	OID31496	1	0.421918	0.537305	N	N	0.408714	0.373238	0.488229	0.406202	3.01116	0.389907	N	N	0.579466	0.529436	0.508571	0.531604	1.75535	0.6247	NA	NA	NA	NA	seq.12338.27	OID31496	0.417405	0.487609
O95721	SNP29	Synaptosomal-associated protein 29	seq.12357.41	OID21506	1	0.339486	0.491333	Y	N	0.292998	0.177303	0.43153	0.355055	11.4596	0.00948319	Y	N	0.560784	0.516065	0.451852	0.371025	9.69355	0.021359	0.386	0.538	NA	NA	seq.12357.41	OID21506	0.52678	0.5586
P78318	IGBP1	Immunoglobulin-binding protein 1	seq.12358.6	OID31059	1	0.762633	0.769904	N	N	0.762243	0.714098	0.798606	0.753201	5.18371	0.158829	N	N	0.806698	0.762592	0.763602	0.719734	5.64089	0.130451	NA	NA	NA	NA	seq.12358.6	OID31059	0.780458	0.810616
Q9Y265	RUVB1	RuvB-like 1	seq.12365.108	OID21211	1	0.00341161	0.0230588	N	N	-0.0409597	0.0213788	-0.0294346	0.0198988	1.44162	0.695807	N	N	-0.0112143	0.0619725	-0.0327643	0.0160132	3.11487	0.374252	NA	NA	NA	NA	seq.12365.108	OID21211	0.0670451	0.0981848
P07320	CRGD	Gamma-crystallin D	seq.12366.16	OID31144	1	-0.24119	0.194821	N	N	-0.259705	-0.176068	-0.296848	-0.233427	2.27669	0.517002	N	N	0.185218	0.249805	0.212193	0.094385	5.01928	0.170391	NA	NA	NA	NA	seq.12366.16	OID31144	0.139697	0.396284
Q13790	Apo F	Apolipoprotein F	seq.12370.30	OID30701	1	0.488635	0.479652	Y	Y	0.291785	0.475629	0.669899	0.551384	50.3822	6.62368e-11	Y	Y	0.673538	0.541111	0.268881	0.450997	56.1763	3.85229e-12	NA	NA	NA	NA	seq.12370.30	OID30701	0.526568	0.50654
P06753	Tropomyosin alpha-3 chain	Tropomyosin alpha-3 chain	seq.12372.50	OID30058	1	0.128607	0.0941857	N	N	0.154839	0.00486982	0.132802	0.137259	3.89313	0.273238	N	N	0.0688537	0.110196	0.0898336	-0.000265558	2.35187	0.502657	NA	NA	NA	NA	NA	NA	NA	NA
Q15102	PA1B3	Platelet-activating factor acetylhydrolase IB subunit gamma	seq.12374.8	OID30998	1	0.0031238	0.00524192	Y	N	0.107266	-0.0610279	0.0620061	-0.0333853	7.81896	0.0499053	N	N	0.0590665	-0.0200604	0.0880155	-0.0326864	4.54212	0.208564	NA	NA	NA	NA	seq.12374.8	OID30998	0.000792593	-0.00499862
P55273	p19-INK4d	Cyclin-dependent kinase 4 inhibitor D	seq.12376.85	OID21295	1	0.81986	0.817462	Y	Y	0.85183	0.69742	0.836521	0.805627	25.9798	9.63083e-06	Y	N	0.832784	0.805306	0.845532	0.716717	18.761	0.000306337	NA	NA	NA	NA	seq.12376.85	OID21295	0.827099	0.842212
O95786	DDX58	Probable ATP-dependent RNA helicase DDX58	seq.12382.2	OID21226	1	0.143914	0.339247	N	N	0.15106	0.12953	0.123844	0.139614	0.152802	0.984823	N	N	0.336396	0.34352	0.355075	0.295847	0.697283	0.873843	0.6	0.723	NA	NA	seq.12382.2	OID21226	0.53694	0.593822
P20807	CAN3	Calpain-3	seq.12385.4	OID31384	1	0.420391	0.421719	N	N	0.450566	0.359553	0.375826	0.421396	2.45306	0.483834	N	N	0.373639	0.423611	0.427309	0.395428	0.979237	0.806276	NA	NA	NA	NA	seq.12385.4	OID31384	0.308337	0.228709
Q8IVM0	CCD50	Coiled-coil domain-containing protein 50	seq.12399.194	OID31001	1	0.196794	0.249387	N	N	0.143674	0.166095	0.246653	0.226534	3.11429	0.374337	N	N	0.294701	0.280711	0.183197	0.232688	3.83477	0.279867	NA	NA	NA	NA	seq.12399.194	OID31001	0.439704	0.476038
Q96DA2	RB39B	Ras-related protein Rab-39B	seq.12403.30	OID30069	1	-0.0834453	0.0298583	N	N	0.0018186	-0.198205	-0.139902	-0.0530586	7.79249	0.0505008	N	N	-0.0345478	0.0428169	0.0904415	-0.0275129	3.62524	0.304878	NA	NA	NA	NA	seq.12403.30	OID30069	0.121173	0.269128
P61244	MAX	Protein max	seq.12411.60	OID20877	1	0.7234	0.731788	Y	N	0.740434	0.627512	0.759016	0.714329	9.59131	0.0223796	Y	N	0.770999	0.718451	0.752832	0.634144	11.3832	0.0098244	0.679	0.755	NA	0.73	seq.12411.60	OID20877	0.732235	0.747814
O60869	EDF1	Endothelial differentiation-related factor 1	seq.12415.122	OID31010	1	-0.105184	0.172854	N	N	-0.150716	-0.0508063	0.0079473	-0.0738067	4.58589	0.204755	N	N	0.27964	0.188687	0.172063	0.164466	2.72017	0.43681	NA	NA	NA	NA	seq.12415.122	OID31010	0.249951	0.455621
Q9Y3C4	TPRKB	EKC/KEOPS complex subunit TPRKB	seq.12417.46	OID31234	1	-0.00972048	0.00407749	N	N	-0.0315297	0.0152002	0.0364179	0.00854146	0.886845	0.828601	N	N	0.0101713	0.0213787	-0.0130747	0.0356363	0.480985	0.923049	NA	NA	NA	NA	seq.12417.46	OID31234	-0.0311681	-0.0187595
P62330	ARF6	ADP-ribosylation factor 6	seq.12425.104	OID31523	1	0.452922	0.541715	N	N	0.445294	0.309782	0.504316	0.461294	7.69483	0.0527582	N	N	0.56902	0.550034	0.548318	0.444845	4.3462	0.226426	NA	NA	NA	NA	seq.12425.104	OID31523	0.531956	0.598331
Q9HB71	CYBP	Calcyclin-binding protein	seq.12432.23	OID30649	1	0.841577	0.85152	N	N	0.857373	0.81523	0.860228	0.825385	6.56205	0.0872471	N	N	0.868831	0.837923	0.863878	0.823387	5.91568	0.115785	NA	NA	NA	NA	seq.12432.23	OID30649	0.754054	0.785331
P53990	K0174	IST1 homolog	seq.12434.25	OID31497	1	0.779203	0.788246	Y	N	0.801797	0.686637	0.80589	0.766092	12.7768	0.00514507	Y	N	0.81411	0.775168	0.805781	0.72176	8.64699	0.0343719	NA	NA	NA	NA	seq.12434.25	OID31497	0.737032	0.774309
P08263	GST A1-1	Glutathione S-transferase A1	seq.12446.49	OID20166	1	0.834754	0.84542	N	N	0.858583	0.832882	0.805539	0.830593	5.46967	0.140464	N	N	0.819158	0.843206	0.864944	0.84004	4.44665	0.217098	NA	NA	NA	NA	seq.17138.8	OID20166	0.807863	0.687732
P30419	NMT1	Glycylpeptide N-tetradecanoyltransferase 1	seq.12448.246	OID31021	1	0.621716	0.627623	N	N	0.624334	0.641263	0.672998	0.59629	3.91029	0.271316	N	N	0.685984	0.599666	0.630575	0.651086	5.14767	0.161298	NA	NA	NA	NA	seq.5196.7	OID31021	0.780395	0.77239
Q15126	PMVK	Phosphomevalonate kinase	seq.12450.42	OID20850	1	0.697122	0.725443	Y	N	0.653281	0.604739	0.753483	0.692924	11.5454	0.00911442	Y	N	0.777893	0.733009	0.693395	0.648801	10.828	0.0126932	0.667	0.776	NA	NA	seq.12450.42	OID20850	0.748412	0.766831
O14867	BACH1	Transcription regulator protein BACH1	seq.12451.62	OID20505	1	-0.0290885	0.185166	N	N	-0.0495777	0.0861499	-0.0183629	0.0243944	3.28937	0.349124	N	N	0.17542	0.240554	0.200756	0.243087	1.33319	0.721267	0.252	0.454	NA	NA	seq.12451.62	OID20505	0.212784	0.266439
Q99653	CHP1	Calcineurin B homologous protein 1	seq.12458.79	OID30869	1	0.0233434	0.0151501	N	N	0.0535537	0.0452983	-0.0460036	0.0284698	1.84451	0.605297	N	N	-0.0667167	0.0217303	0.0668079	0.031413	3.05662	0.382978	NA	NA	NA	NA	seq.12458.79	OID30869	0.0451541	0.0579984
Q9NXA8	SIRT5	NAD-dependent protein deacylase sirtuin-5, mitochondrial	seq.12461.8	OID20820	1	0.0369352	0.0543451	N	N	0.0430578	0.0249112	0.0193556	0.0480345	0.23373	0.971969	N	N	0.0776357	0.07354	0.0396898	0.0302698	0.640363	0.887133	-0.01	0.13	NA	0.02	seq.12461.8	OID20820	0.155005	0.202969
Q53H47	SETMR	Histone-lysine N-methyltransferase SETMAR	seq.12462.20	OID20948	1	-0.0384934	0.150881	N	N	-0.0328534	0.0180881	-0.0361378	-0.0661179	1.41173	0.702787	N	N	0.123674	0.133369	0.154309	0.143491	0.20728	0.976406	NA	NA	NA	NA	seq.12462.20	OID20948	0.0186989	0.241951
O95793	STAU1	Double-stranded RNA-binding protein Staufen homolog 1	seq.12471.47	OID31210	1	0.132274	0.199109	Y	N	0.132073	0.149228	0.291083	0.101343	8.38547	0.0386821	N	N	0.345921	0.184301	0.173712	0.196446	7.29622	0.0630322	NA	NA	NA	NA	seq.12471.47	OID31210	0.303771	0.463671
Q9NXV2	KCTD5	BTB/POZ domain-containing protein KCTD5	seq.12473.48	OID31148	1	-0.128025	0.128343	N	N	-0.186527	-0.106153	-0.0993592	-0.130946	1.78599	0.617989	N	N	0.115427	0.142317	0.0501641	0.119961	2.58671	0.459824	NA	NA	NA	NA	seq.12473.48	OID31148	-0.0796023	0.242548
Q9NZA1	CLIC5	Chloride intracellular channel protein 5	seq.12475.48	OID30890	1	0.0329392	0.0576578	N	N	0.0860865	0.0513255	0.0891764	0.00551172	2.73778	0.433845	N	N	0.0791331	0.046897	0.108486	0.037402	1.37587	0.711201	NA	NA	NA	NA	seq.12475.48	OID30890	0.0161544	0.0325505
Q9NQ88	TIGAR	Fructose-2,6-bisphosphatase TIGAR	seq.12476.50	OID20894	1	0.0013025	0.167963	N	N	-0.0298456	0.0978669	0.0077095	-0.016252	2.84254	0.416545	N	N	0.191236	0.13418	0.211899	0.209158	2.59181	0.458927	0.35	0.598	NA	0.27	seq.12476.50	OID20894	0.268721	0.396977
Q9ULC4	MCTS1	Malignant T-cell-amplified sequence 1	seq.12488.9	OID31444	1	-0.0509083	-0.0110271	N	N	0.0024125	0.0258192	0.0081291	-0.105087	6.30597	0.0976366	N	N	-0.00620983	-0.0486252	0.0535073	0.0714567	4.61532	0.202232	NA	NA	NA	NA	seq.12488.9	OID31444	0.147356	0.281318
O75347	TBCA	Tubulin-specific chaperone A	seq.12501.10	OID30616	1	0.051437	0.204195	N	N	-0.0292248	0.00881101	0.142235	0.0870246	6.65808	0.0836322	Y	N	0.281441	0.247852	0.114116	0.130772	8.82862	0.0316584	NA	NA	NA	NA	seq.12501.10	OID30616	0.0529059	0.191678
P29536	LMOD1	Leiomodin-1	seq.12504.26	OID30547	3	0.0952931	0.0889222	N	N	0.0649198	0.10882	0.119533	0.103353	0.667835	0.880742	N	N	0.0878951	0.108325	0.110508	0.0768993	0.272073	0.965192	NA	NA	NA	NA	seq.12504.26, seq.12504.26, seq.12504.26, seq.12504.26	OID30212, OID30547, OID31014, OID31416	0.211216657, 0.190694432, 0.211632322, 0.188972728	0.102077437, 0.109824725, 0.100751598, 0.09284342
P29536	LMOD1	Leiomodin-1	seq.12504.26	OID31416	4	0.0900734	0.0885381	N	N	0.0252626	0.164239	0.0809971	0.0997648	3.24347	0.355588	N	N	0.0695915	0.100108	0.0905562	0.136241	0.595937	0.897362	NA	NA	NA	NA	seq.12504.26, seq.12504.26, seq.12504.26, seq.12504.26	OID30212, OID30547, OID31014, OID31416	0.211216657, 0.190694432, 0.211632322, 0.188972728	0.102077437, 0.109824725, 0.100751598, 0.09284342
P29536	LMOD1	Leiomodin-1	seq.12504.26	OID31014	2	0.0977572	0.0929432	N	N	0.0635354	0.139168	0.114541	0.0965869	0.998086	0.801715	N	N	0.0594671	0.103562	0.13324	0.105534	0.935013	0.816971	NA	NA	NA	NA	seq.12504.26, seq.12504.26, seq.12504.26, seq.12504.26	OID30212, OID30547, OID31014, OID31416	0.211216657, 0.190694432, 0.211632322, 0.188972728	0.102077437, 0.109824725, 0.100751598, 0.09284342
P29536	LMOD1	Leiomodin-1	seq.12504.26	OID30212	1	0.103462	0.0930872	N	N	0.073985	0.156602	0.0969844	0.104461	1.06297	0.78602	N	N	0.0590474	0.102158	0.129443	0.124532	0.951549	0.812973	NA	NA	NA	NA	seq.12504.26, seq.12504.26, seq.12504.26, seq.12504.26	OID30212, OID30547, OID31014, OID31416	0.211216657, 0.190694432, 0.211632322, 0.188972728	0.102077437, 0.109824725, 0.100751598, 0.09284342
Q8N668	COMD1	COMM domain-containing protein 1	seq.12509.115	OID30222	1	-0.0509018	0.077587	N	N	-0.0553294	-0.130623	0.0692189	-0.0543776	5.41122	0.144046	N	N	0.192081	0.0771568	0.0778116	-0.0139195	5.58887	0.133419	NA	NA	NA	NA	seq.12509.115	OID30222	0.0203336	0.221521
O14737	TFAR19	Programmed cell death protein 5	seq.12517.52	OID21021	1	0.737439	0.781866	Y	N	0.778962	0.729989	0.798232	0.691026	18.7003	0.000315314	Y	N	0.839348	0.749432	0.809664	0.745294	17.7403	0.000497565	NA	NA	NA	NA	seq.12517.52	OID21021	0.703829	0.766478
P54727	RD23B	UV excision repair protein RAD23 homolog B	seq.12522.6	OID21166	1	0.651141	0.67081	N	N	0.675659	0.62877	0.65527	0.624498	2.59971	0.45754	N	N	0.678649	0.652907	0.68739	0.684811	1.55012	0.670752	NA	NA	NA	NA	seq.12522.6	OID21166	0.677265	0.705325
Q96F10	SAT2	Diamine acetyltransferase 2	seq.12524.18	OID31306	1	0.137888	0.21318	N	N	0.0854374	0.202721	0.20587	0.126346	3.72271	0.293005	N	N	0.282464	0.226567	0.135978	0.182507	4.64047	0.200098	NA	NA	NA	NA	seq.12524.18	OID31306	0.334236	0.370799
B6SEH8	ERVV1	Endogenous retrovirus group V member 1 Env polyprotein	seq.12531.5	OID30094	1	0.00706648	0.00200458	N	N	-0.015755	-0.0109505	-0.00891176	0.0118329	0.288128	0.962246	N	N	-0.0441403	0.010118	-0.0268995	-0.00232663	0.828885	0.842546	NA	NA	NA	NA	seq.12531.5	OID30094	0.015851	-0.0168129
Q13137	CACO2	Calcium-binding and coiled-coil domain-containing protein 2	seq.12534.10	OID30249	1	-0.261507	0.213074	N	N	-0.290229	-0.292429	-0.144767	-0.198388	5.94025	0.114554	Y	N	0.261519	0.32065	0.190357	0.119144	11.3414	0.0100162	NA	NA	NA	NA	seq.12534.10	OID30249	-0.0980427	0.308203
P53814	SMTN	Smoothelin	seq.12546.1	OID31154	1	0.550306	0.578465	Y	N	0.62355	0.503593	0.570687	0.508434	9.75394	0.0207778	Y	N	0.591795	0.545852	0.646461	0.544686	7.97755	0.0464779	NA	NA	NA	NA	seq.12546.1	OID31154	0.721401	0.722172
O60760	PTGD2	Hematopoietic prostaglandin D synthase	seq.12549.33	OID21266	1	0.593812	0.647543	Y	Y	0.638812	0.613115	0.383758	0.617455	25.151	1.43578e-05	Y	Y	0.419543	0.682385	0.726817	0.601378	43.4632	1.9623e-09	0.482	0.688	NA	0.69	seq.12549.33	OID21266	0.60996	0.673613
Q8TCD5	NT5C	5'(3')-deoxyribonucleotidase, cytosolic type	seq.12560.9	OID30294	1	0.696879	0.755656	Y	N	0.709858	0.604593	0.756299	0.66737	12.446	0.00600167	Y	N	0.79733	0.738202	0.75057	0.680342	8.84604	0.0314094	NA	NA	NA	NA	seq.12560.9	OID30294	0.721735	0.78025
O95379	TFIP8	Tumor necrosis factor alpha-induced protein 8	seq.12563.2	OID20433	1	0.411013	0.409428	Y	N	0.485074	0.309921	0.46508	0.3511	12.0768	0.00712468	Y	N	0.487144	0.35489	0.471716	0.299256	12.2376	0.00661209	NA	NA	NA	NA	seq.12563.2	OID20433	0.534139	0.535814
P48643	TCP-1-epsilon	T-complex protein 1 subunit epsilon	seq.12569.25	OID21200	1	0.455241	0.495182	N	N	0.531269	0.399466	0.484056	0.425773	7.094	0.0689612	N	N	0.52048	0.473277	0.56418	0.438078	6.29121	0.0982707	NA	NA	NA	NA	seq.12569.25	OID21200	0.428246	0.556917
P43357	MAGE-3	Melanoma-associated antigen 3	seq.12576.21	OID31331	2	-0.0230906	-0.0179862	N	N	0.0244191	0.0106739	-0.0913587	-0.0367083	2.69961	0.440293	N	N	-0.0250584	-0.0321095	-0.0481961	0.0839525	2.96438	0.39715	NA	NA	NA	NA	seq.12576.21	OID31331	-0.0282725	-0.0313887
P39748	FLAP endonuclease-1	Flap endonuclease 1	seq.12577.100	OID21192	1	-0.177231	0.137878	N	N	-0.223173	-0.129097	-0.117085	-0.174932	2.54728	0.466808	Y	N	0.0190195	0.19071	0.168258	0.00965096	10.9098	0.012224	NA	NA	NA	NA	seq.12577.100	OID21192	0.0512049	0.315805
P10398	ARAF	Serine/threonine-protein kinase A-Raf	seq.12583.77	OID31260	1	0.20564	0.2557	N	N	0.180708	0.243598	0.263683	0.192772	1.85721	0.602566	N	N	0.328214	0.2446	0.226769	0.298958	2.73406	0.43447	NA	NA	NA	NA	seq.12583.77	OID31260	0.394235	0.486738
P07992	ERCC1	DNA excision repair protein ERCC-1	seq.12585.39	OID31223	1	0.0119846	0.0369035	N	N	0.0252427	0.00922711	0.0450482	0.00558983	0.380598	0.944221	N	N	0.0155521	0.0579757	0.0503071	0.0224282	0.524432	0.913492	NA	NA	NA	NA	seq.12585.39	OID31223	0.0653571	0.0849866
O60890	Oligophrenin-1	Oligophrenin-1	seq.12591.27	OID31087	1	0.612187	0.641889	Y	N	0.661378	0.51672	0.660128	0.582372	11.132	0.0110329	Y	N	0.687555	0.620601	0.684635	0.550447	10.1261	0.0175242	NA	NA	NA	NA	seq.12591.27	OID31087	0.4627	0.531797
Q9NUG6	PDRG1	p53 and DNA damage-regulated protein 1	seq.12593.33	OID30912	1	0.09046	0.0920983	Y	N	0.0825563	0.223479	0.197263	0.0406686	9.828	0.0200862	Y	N	0.199953	0.0388963	0.099332	0.212345	9.42545	0.0241378	NA	NA	NA	NA	seq.12593.33	OID30912	0.164398	0.240863
Q9Y6E0	STK24	Serine/threonine-protein kinase 24	seq.12617.2	OID20837	1	0.585217	0.600894	Y	N	0.60044	0.475789	0.669265	0.556098	12.2227	0.00665798	Y	N	0.67639	0.572326	0.617351	0.521179	9.42236	0.0241719	NA	NA	NA	NA	seq.12617.2	OID20837	0.58684	0.726916
P35813	Protein phophatase 2Ca	Protein phosphatase 1A	seq.12619.14	OID21184	1	0.129612	0.147105	N	N	0.182982	0.111062	0.120475	0.0626712	4.54515	0.208298	N	N	0.155041	0.0806824	0.210317	0.143821	5.53958	0.136291	NA	NA	NA	NA	seq.12619.14	OID21184	0.105873	0.246482
P43378	PTN9	Tyrosine-protein phosphatase non-receptor type 9	seq.12633.3	OID30437	1	-0.024731	-0.00880457	N	N	0.0147782	0.032501	0.0548082	-0.0732754	5.35857	0.147347	N	N	0.0351674	-0.025061	0.00436118	0.0822145	2.45847	0.482843	NA	NA	NA	NA	seq.12633.3	OID30437	0.278353	0.293529
O14717	TRDMT	tRNA (cytosine(38)-C(5))-methyltransferase	seq.12635.9	OID31335	1	-0.0991781	0.220435	N	N	-0.0800016	-0.0522136	-0.0235458	-0.1416	3.98749	0.262818	N	N	0.294407	0.233898	0.182521	0.144801	3.98893	0.262662	NA	NA	NA	NA	seq.12635.9	OID31335	0.550877	0.639397
Q96AT9	RPE	Ribulose-phosphate 3-epimerase	seq.12646.2	OID31324	1	0.456093	0.476382	N	N	0.505601	0.38549	0.523622	0.417207	7.74353	0.0516206	N	N	0.542831	0.446754	0.511271	0.413353	5.84125	0.119594	NA	NA	NA	NA	seq.12646.2	OID31324	0.693993	0.727673
Q9H0R8	GBRL1	Gamma-aminobutyric acid receptor-associated protein-like 1	seq.12661.44	OID31253	1	0.0296291	0.0253119	N	N	0.0301246	0.150556	0.00711371	-0.0019006	4.43646	0.218029	N	N	-0.0358323	0.0132187	0.0275793	0.132313	3.80927	0.282809	NA	NA	NA	NA	seq.12661.44	OID31253	0.033611	0.0346725
Q16762	THTR	Thiosulfate sulfurtransferase	seq.12663.1	OID20868	1	-0.0893304	0.0655856	N	N	-0.0349809	-0.0886624	-0.0971791	-0.114823	1.93413	0.58619	N	N	0.093432	0.0433288	0.121121	0.0709472	1.97483	0.577647	NA	NA	NA	NA	seq.12663.1	OID20868	-0.163521	0.0660464
O75351	VPS4B	Vacuolar protein sorting-associated protein 4B	seq.12668.7	OID31386	1	0.367605	0.448978	Y	N	0.405203	0.340262	0.535216	0.352134	12.1298	0.00695164	Y	N	0.583187	0.431054	0.488784	0.4437	9.51937	0.0231262	NA	NA	NA	NA	seq.12668.7	OID31386	0.641127	0.654673
P14868	SYDC	Aspartate--tRNA ligase, cytoplasmic	seq.12675.14	OID20903	1	0.704781	0.738866	N	N	0.721059	0.61823	0.698013	0.700041	5.46926	0.140489	N	N	0.719796	0.738601	0.752894	0.677158	4.03764	0.257428	NA	NA	NA	NA	seq.12675.14	OID20903	0.598368	0.738347
Q9Y6U3	ADSV	Adseverin	seq.12684.5	OID30857	1	-0.0144891	-0.00191953	N	N	-0.00342557	-0.0140787	-0.0182839	-0.0238427	0.126604	0.988464	N	N	-0.00384529	-0.00527607	0.028998	-0.0574745	1.12946	0.769967	NA	NA	NA	NA	seq.12684.5	OID30857	0.00642054	-0.000290171
Q16698	DECR	2,4-dienoyl-CoA reductase, mitochondrial	seq.12687.2	OID20579	1	0.747751	0.762882	N	N	0.774474	0.696222	0.772004	0.730392	6.53791	0.0881792	N	N	0.788634	0.746188	0.787811	0.712125	6.95199	0.073444	0.443	0.584	NA	0.77	seq.12687.2	OID20579	0.33084	0.37825
Q8TDX7	NEK7	Serine/threonine-protein kinase Nek7	seq.12703.6	OID31250	1	0.410878	0.425856	Y	N	0.426875	0.502289	0.546291	0.357406	15.1111	0.00172409	Y	N	0.552174	0.374919	0.442738	0.511368	13.7138	0.00332181	NA	NA	NA	NA	seq.12703.6	OID31250	0.586824	0.690824
P48165	CXA8	Gap junction alpha-8 protein	seq.12711.19	OID31187	1	0.00375632	0.00665123	Y	N	-0.112535	-0.109377	0.0211893	0.0801779	14.4603	0.00234106	N	N	0.00519289	0.0545107	-0.0652612	-0.0658435	5.60481	0.132503	NA	NA	NA	NA	seq.12711.19	OID31187	-0.0119388	-0.00897249
O75843	AP1G2	AP-1 complex subunit gamma-like 2	seq.12714.38	OID31348	1	0.691322	0.706342	Y	N	0.753248	0.63353	0.635996	0.682672	12.6826	0.00537572	Y	N	0.654099	0.70347	0.756626	0.65568	9.77769	0.0205536	NA	NA	NA	NA	seq.12714.38	OID31348	0.639724	0.655442
Q86VP1	TAXB1	Tax1-binding protein 1	seq.12721.4	OID31075	1	-0.186573	0.19939	Y	N	-0.279982	-0.145923	-0.146494	-0.125933	8.05749	0.0448385	N	N	0.20201	0.26781	0.136559	0.198743	5.87235	0.117989	NA	NA	NA	NA	seq.12721.4	OID31075	0.068762	0.19833
Q14011	CIRBP	Cold-inducible RNA-binding protein	seq.12724.81	OID31503	1	0.810999	0.821877	Y	N	0.838818	0.746918	0.823324	0.799376	10.6334	0.0138827	Y	N	0.841432	0.811654	0.842466	0.753498	11.1683	0.0108495	NA	NA	NA	NA	seq.12724.81	OID31503	0.745564	0.785706
Q9BT73	PSMG3	Proteasome assembly chaperone 3	seq.12729.12	OID20549	1	0.467396	0.510338	N	N	0.497441	0.366396	0.539955	0.441035	7.59471	0.0551742	Y	N	0.590998	0.505748	0.50649	0.401256	8.0479	0.045032	NA	NA	NA	NA	seq.12729.12	OID20549	0.542336	0.637176
Q14807	KIF22	Kinesin-like protein KIF22	seq.12734.112	OID30175	1	-0.159467	0.0826633	N	N	-0.201299	-0.169302	-0.172621	-0.135194	1.46371	0.69067	N	N	0.0714406	0.122384	0.0822448	-0.031292	4.4783	0.214234	NA	NA	NA	NA	seq.12734.112	OID30175	-0.075395	0.126925
O75534	CSDE1	Cold shock domain-containing protein E1	seq.12735.39	OID30183	1	0.0605514	0.220793	Y	N	-0.0406336	0.119859	0.158196	0.0738461	8.09172	0.0441537	N	N	0.333929	0.218484	0.186349	0.266457	4.85266	0.182909	NA	NA	NA	NA	seq.12735.39	OID30183	0.324425	0.469621
Q58F21	BRDT	Bromodomain testis-specific protein	seq.12748.6	OID30179	1	-0.0509387	0.148463	N	N	-0.0620496	-0.0541421	-0.0997452	-0.0278847	1.2125	0.750008	N	N	0.0968704	0.160284	0.159193	0.145552	0.943437	0.814935	NA	NA	NA	NA	seq.12748.6	OID30179	0.275617	0.312597
P05107	LFA-1 beta-2	Integrin beta-2	seq.12750.9	OID20315	1	0.0245764	0.155199	N	N	0.0208151	0.0229941	-0.0203642	-0.00831539	0.487447	0.92164	N	N	0.077978	0.118879	0.143256	0.145058	0.881067	0.829994	-0.088	-0.025	NA	0.1	seq.12750.9	OID20315	0.0151099	0.129067
Q15633	TRBP2	RISC-loading complex subunit TARBP2	seq.12781.2	OID20870	1	0.350336	0.482974	N	N	0.387912	0.338497	0.424075	0.317195	4.2223	0.238439	N	N	0.50355	0.478587	0.516966	0.45557	1.30833	0.727155	NA	NA	NA	NA	seq.12781.2	OID20870	0.615865	0.659078
P59282	TPPP2	Tubulin polymerization-promoting protein family member 2	seq.12800.5	OID31274	1	0.00839684	0.0337356	N	N	-0.0172388	-0.00980793	-0.0992337	0.0254983	3.38393	0.336131	N	N	-0.125788	0.0536015	0.033604	0.0396588	7.10473	0.0686335	NA	NA	NA	NA	seq.12800.5	OID31274	0.00640571	0.0215421
Q7Z6I6	RHG30	Rho GTPase-activating protein 30	seq.12807.89	OID31336	1	0.0247731	0.0455545	N	N	0.0709069	0.0410431	0.0022326	-0.0309359	3.40517	0.333271	N	N	0.00317846	0.0037689	0.114943	0.0734877	4.33385	0.227598	NA	NA	NA	NA	seq.12807.89	OID31336	0.117538	0.0829008
Q9Y2V2	CHSP1	Calcium-regulated heat-stable protein 1	seq.12808.103	OID20859	1	0.141471	0.34104	N	N	0.18616	0.171648	0.149982	0.108264	2.22167	0.527692	N	N	0.266462	0.346551	0.348239	0.32095	1.85599	0.602827	0.48	0.557	NA	NA	seq.12808.103	OID20859	0.436772	0.633806
Q8NDI1	EHBP1	EH domain-binding protein 1	seq.12813.18	OID30302	1	-0.129697	0.291641	N	N	-0.154443	-0.120985	-0.10964	-0.157948	0.69465	0.874462	N	N	0.345691	0.310709	0.227825	0.279315	3.48332	0.322932	NA	NA	NA	NA	seq.12813.18	OID30302	-0.0797847	0.361153
O00422	SAP18	Histone deacetylase complex subunit SAP18	seq.12830.4	OID31323	1	-0.00668631	0.00158742	N	N	-0.00176379	-0.0629249	0.00772217	-0.013469	0.742246	0.863225	N	N	0.0303559	-0.00715568	0.0199906	-0.0654192	1.44213	0.69569	NA	NA	NA	NA	seq.12830.4	OID31323	0.0325267	0.0420079
Q8WXC3	PYDC1	Pyrin domain-containing protein 1	seq.12835.101	OID30202	1	0.0188091	0.0147166	N	N	0.021553	0.0912915	-0.00913506	-0.0184646	2.39682	0.494226	N	N	0.0102933	-0.0112623	0.107043	0.0439625	4.33373	0.227609	NA	NA	NA	NA	seq.12835.101	OID30202	-0.0936948	-0.0103327
O95429	BAG4	BAG family molecular chaperone regulator 4	seq.12844.10	OID30474	1	0.138951	0.318382	N	N	0.222321	0.0581622	0.110376	0.110844	5.62464	0.131371	N	N	0.284489	0.312627	0.389786	0.236815	5.11296	0.16371	NA	NA	NA	NA	seq.12844.10	OID30474	0.299761	0.480892
O75521	PECI	Enoyl-CoA delta isomerase 2, mitochondrial	seq.12859.33	OID30142	1	0.36406	0.378355	Y	N	0.430123	0.322748	0.475997	0.325584	9.84445	0.0199357	N	N	0.47772	0.346258	0.439032	0.37447	7.20392	0.0656744	NA	NA	NA	NA	seq.12859.33	OID30142	0.486925	0.510643
Q14511	CASL	Enhancer of filamentation 1	seq.12862.14	OID30503	1	0.0111716	0.105423	N	N	-0.0734196	-0.0651496	0.0922973	0.0318193	6.58903	0.0862169	N	N	0.05421	0.126951	0.0918982	0.0785264	1.40491	0.704385	NA	NA	NA	NA	seq.12862.14	OID30503	-0.068554	0.120463
P51808	DYLT3	Dynein light chain Tctex-type 3	seq.12867.40	OID31415	1	-0.163516	0.144516	N	N	-0.218867	-0.132545	-0.0996319	-0.158051	2.8423	0.416584	N	N	0.185864	0.181746	0.105353	0.00242714	7.22116	0.0651731	NA	NA	NA	NA	seq.12867.40	OID31415	0.0911745	0.284087
Q7L0J3	SV2A	Synaptic vesicle glycoprotein 2A	seq.12880.1	OID30965	1	-0.121594	0.147691	N	N	-0.214144	-0.177974	-0.0394928	-0.119605	6.11118	0.106325	Y	N	0.248673	0.158102	0.111626	0.0135379	7.86242	0.0489424	NA	NA	NA	NA	seq.12880.1	OID30965	0.0223134	0.132039
Q8IY33	MILK2	MICAL-like protein 2	seq.12891.1	OID30889	1	-0.0912284	0.110154	Y	N	-0.21869	-0.0214659	-0.016697	-0.031437	12.8056	0.00507634	N	N	0.180649	0.152679	0.0568736	0.153719	3.70287	0.295388	NA	NA	NA	NA	seq.12891.1	OID30889	-0.0286084	0.174959
Q04695	Keratin 17	Keratin, type I cytoskeletal 17	seq.12923.51	OID30092	1	-0.000280067	0.000490478	N	N	0.0186466	-0.102499	-0.064774	0.0353573	4.88789	0.180193	N	N	-0.00376923	0.00377041	0.0130394	-0.0298155	0.293124	0.961316	NA	NA	NA	NA	seq.12923.51	OID30092	0.0133624	0.0227053
Q96EK5	KBP	KIF1-binding protein	seq.12956.40	OID21320	1	0.829345	0.837187	Y	N	0.85564	0.734517	0.855203	0.814607	21.0293	0.00010381	Y	N	0.854143	0.825903	0.864797	0.731992	23.5677	3.07475e-05	0.731	0.823	NA	NA	seq.12956.40	OID21320	0.784071	0.804099
P46783	RS10	40S ribosomal protein S10	seq.13011.20	OID30070	1	-0.0145015	-0.0212797	N	N	0.00698339	-0.0260544	-0.0552687	-0.0182078	0.667721	0.880769	N	N	-0.0478282	-0.0281785	-0.0022054	-0.0229397	0.379535	0.944437	NA	NA	NA	NA	seq.13011.20	OID30070	-0.00781526	0.0176205
Q14457	BECN1	Beclin-1	seq.13032.1	OID30220	1	-0.263507	0.200626	Y	N	-0.242678	-0.176341	-0.090052	-0.322394	14.6522	0.00213933	N	N	0.321318	0.207427	0.20144	0.176223	4.08269	0.252673	NA	NA	NA	NA	seq.13032.1	OID30220	-0.0331249	0.318299
O60234	GMFG	Glia maturation factor gamma	seq.13062.4	OID30340	1	0.727297	0.7527	N	N	0.709545	0.657701	0.761132	0.725376	5.82201	0.120598	N	N	0.78543	0.747608	0.734745	0.692357	5.58866	0.133431	NA	NA	NA	NA	seq.13062.4	OID30340	0.558552	0.643264
Q13976	KGP1B	cGMP-dependent protein kinase 1, beta isozyme	seq.13067.5	OID30621	1	0.0828702	0.383592	N	N	0.0617034	0.0568524	0.168839	0.0732873	2.53379	0.469216	N	N	0.418689	0.374816	0.393103	0.332714	1.38694	0.708599	NA	NA	NA	NA	seq.13067.5	OID30621	0.326176	0.373278
O14618	CCS	Copper chaperone for superoxide dismutase	seq.13068.139	OID20973	1	-0.0664896	0.0876973	N	N	-0.109115	-0.053383	-0.025051	-0.0567049	1.39467	0.706785	N	N	0.101618	0.131406	0.0326386	0.0656731	3.19194	0.362968	NA	NA	NA	NA	seq.13068.139	OID20973	0.0860662	0.304094
P41208	CETN2	Centrin-2	seq.13078.3	OID20836	1	0.232436	0.331922	N	N	0.227656	0.167719	0.254506	0.229936	1.10659	0.775483	N	N	0.371074	0.337099	0.307286	0.270699	1.89249	0.595018	0.669	0.642	NA	NA	seq.13078.3	OID20836	0.423288	0.46312
P43220	GLP1R:CD	Glucagon-like peptide 1 receptor:Cytoplasmic domain	seq.13085.18	OID30809	1	0.00303077	0.0326678	N	N	0.0363054	0.0129598	-0.0219979	0.00223899	0.633006	0.888837	N	N	-0.0471622	0.0383234	0.0707198	0.0739905	2.75655	0.430702	NA	NA	NA	NA	seq.13085.18	OID30809	0.0102328	-0.00471491
P35070	BTC	Betacellulin	seq.13088.397	OID21199	1	-0.0312638	0.203836	N	N	-0.0695628	-0.164413	0.0635647	-0.0270214	7.09955	0.0687915	Y	N	0.37728	0.267861	0.114908	0.0749533	20.6822	0.000122548	0.617	0.64	0	0.3	seq.13088.397	OID21199	0.364238	0.452514
Q16665	HIF-1a	Hypoxia-inducible factor 1-alpha	seq.13089.6	OID30425	1	-0.0388096	0.00824672	N	N	-0.0743806	0.0466999	0.00101717	-0.0505298	2.78065	0.426695	N	N	0.0443273	0.0255972	-0.0373972	0.027964	1.57556	0.664944	NA	NA	NA	NA	seq.13089.6	OID30425	0.00877062	0.0439975
Q9BXY4	RSPO3	R-spondin-3	seq.13094.75	OID21415	2	0.271411	0.291575	N	N	0.253417	0.316096	0.17236	0.286545	3.88189	0.274503	N	N	0.207675	0.328453	0.322866	0.335216	3.96686	0.265065	0.254	0.44	0.48	NA	seq.13094.75, seq.8427.118	OID21415, OID21415	0.450989433, 0.489144238	0.487536047, 0.508156434
P05451	PSP	Lithostathine-1-alpha	seq.13095.51	OID20415	1	0.832642	0.855095	Y	Y	0.789875	0.818934	0.908459	0.817285	37.622	3.39822e-08	Y	Y	0.922818	0.843746	0.80866	0.848199	41.9017	4.20953e-09	0.812	0.84	0.82	0.85	seq.13095.51	OID20415	0.760767	0.769011
O43915	VEGF-D	Vascular endothelial growth factor D	seq.13098.93	OID20662	1	0.603393	0.604692	Y	N	0.570127	0.439507	0.579922	0.637486	15.5515	0.00140116	Y	N	0.620111	0.632746	0.591833	0.41963	16.745	0.000797433	0.478	0.651	0.67	0.7, 0.43	seq.13098.93, seq.14705.1	OID20662, OID20662	0.61289832, 0.461131533	0.670264935, 0.438951013
Q9BQB4	SOST	Sclerostin	seq.13101.60	OID20204	1	0.568129	0.542164	N	N	0.564352	0.4936	0.59412	0.58379	3.39027	0.335275	N	N	0.621146	0.549333	0.504449	0.500012	5.93918	0.114607	0.671	0.554	0.65	NA	seq.13101.60	OID20204	0.611638	0.535913
Q96BQ1	FAM3D	Protein FAM3D	seq.13102.1	OID31514	1	0.830573	0.846381	Y	N	0.783096	0.826249	0.792298	0.853335	17.1697	0.000652157	Y	N	0.80969	0.861064	0.818691	0.849296	9.91522	0.0193007	NA	NA	NA	NA	seq.13102.1	OID31514	0.844509	0.852723
P60880	SNP25	Synaptosomal-associated protein 25	seq.13105.7	OID30811	1	-0.059043	0.0460776	Y	N	-0.0456083	-0.127584	0.0997969	-0.0675495	7.83285	0.0495954	N	N	0.189035	0.0304944	0.0548572	-0.0272092	7.18567	0.0662096	NA	NA	NA	NA	seq.13105.7	OID30811	0.148726	0.297741
O95274	LYPD3	Ly6/PLAUR domain-containing protein 3	seq.13107.9	OID21530	1	0.400744	0.333804	N	N	0.410081	0.427423	0.361165	0.424388	1.27239	0.735699	N	N	0.344089	0.319585	0.401735	0.407157	3.68012	0.298141	0.485	0.394	0.48	NA	seq.13107.9	OID21530	0.48095	0.30477
Q12841	FSTL1	Follistatin-related protein 1	seq.13112.179	OID30254	1	0.438792	0.561713	N	N	0.436555	0.374986	0.473256	0.445847	1.92829	0.587422	N	N	0.603543	0.563004	0.546848	0.507887	2.57304	0.462236	NA	NA	NA	NA	seq.13112.179	OID30254	0.379983	0.514967
P10451	Osteopontin	Osteopontin	seq.13113.7	OID20322	1	0.452414	0.519801	N	N	0.464564	0.477273	0.548908	0.437769	4.65677	0.198725	N	N	0.600666	0.50136	0.555466	0.492158	5.55013	0.135671	0.507	0.581	0.52	0.67	seq.13113.7	OID20322	0.595447	0.567629
Q8N6Q3	CD177	CD177 antigen	seq.13116.25	OID21119	1	0.866377	0.867702	N	N	0.881856	0.86042	0.865622	0.850736	4.73791	0.192026	N	N	0.854234	0.853959	0.886611	0.852737	6.17276	0.103501	0.907	0.904	0.95	NA	seq.13116.25	OID21119	0.872432	0.873691
Q9H4F8	SMOC1	SPARC-related modular calcium-binding protein 1	seq.13118.5	OID21461	1	0.360023	0.529081	N	N	0.361651	0.352085	0.281918	0.38032	2.61398	0.455044	N	N	0.464827	0.556174	0.496582	0.489362	4.69335	0.195679	0.485	0.624	0.57	NA	seq.13118.5	OID21461	0.529645	0.5869
O43155	FLRT2	Leucine-rich repeat transmembrane protein FLRT2	seq.13122.19	OID20946	1	0.479353	0.567956	Y	N	0.401242	0.405485	0.492794	0.51947	8.7545	0.0327395	N	N	0.52387	0.605869	0.511724	0.539803	7.31816	0.0624194	0.386	0.661	0.55	NA	seq.13122.19	OID20946	0.460598	0.554299
Q6UXK2	ISLR2	Immunoglobulin superfamily containing leucine-rich repeat protein 2	seq.13124.20	OID20889	2	0.55831	0.594937	N	N	0.505231	0.579979	0.626081	0.548072	5.7713	0.123283	N	N	0.643142	0.575851	0.583991	0.564347	2.77729	0.427253	0.525	0.646	0.56	NA	seq.13124.20	OID20889	0.523256	0.547633
Q02487	DSC2	Desmocollin-2	seq.13126.52	OID21079	1	0.35361	0.459087	Y	N	0.276489	0.210448	0.485299	0.353991	15.3522	0.0015391	Y	N	0.525902	0.486016	0.371994	0.312813	14.4539	0.00234813	0.181	0.328	0.44	NA	seq.13126.52	OID21079	0.393807	0.484458
P01130	LDLR	Low-density lipoprotein receptor	seq.13129.40	OID20240	1	0.014474	0.13521	Y	N	0.101338	0.0990447	-0.108258	-0.0017033	9.32205	0.0253018	N	N	0.0625202	0.161268	0.115305	0.144333	2.33855	0.505176	-0.054	0.171	0.03	0.01	seq.13129.40	OID20240	-0.0290594	0.178112
P52789	HXK2	Hexokinase-2	seq.13130.150	OID20065	1	0.05348	0.0695175	N	N	0.0433843	0.122475	-0.00465085	0.0578316	2.09319	0.553291	N	N	0.0510383	0.081561	0.0476392	0.0937834	0.575103	0.902108	NA	NA	0.01	NA	seq.13130.150	OID20065	0.0687108	0.0696763
P15291	B4GT1	Beta-1,4-galactosyltransferase 1	seq.13381.49	OID20780	1	0.523815	0.659021	Y	N	0.5571	0.57172	0.546554	0.446483	10.5833	0.0142066	Y	N	0.668573	0.613655	0.702489	0.606407	8.74956	0.0328128	0.501	0.574	NA	NA	seq.13381.49	OID20780	0.391476	0.506156
P07954	FUMH	Fumarate hydratase, mitochondrial	seq.13384.110	OID30839	1	0.0296295	0.0249387	N	N	0.0776792	-0.0647511	-0.0318198	0.0600356	4.88601	0.180337	N	N	-0.0353535	0.0539443	0.0650578	-0.0362332	3.23701	0.356506	NA	NA	NA	NA	seq.13384.110	OID30839	0.0164011	0.0302569
P05026	AT1B1	Sodium/potassium-transporting ATPase subunit beta-1	seq.13392.13	OID30124	1	-0.0104639	-0.005087	N	N	0.0237024	0.00218948	-0.0654451	-0.0598117	2.64997	0.448796	N	N	-0.0292267	-0.0550861	0.00478667	0.0544926	2.68322	0.443087	NA	NA	NA	NA	seq.13392.13	OID30124	0.0265598	0.020246
O15263	HBD-2	Beta-defensin 4A	seq.13397.88	OID21373	1	0.747602	0.771847	N	N	0.76487	0.763989	0.758411	0.730424	2.55285	0.465815	N	N	0.786783	0.759715	0.788482	0.773325	1.991	0.574277	0.924	0.952	NA	NA	seq.13397.88	OID21373	0.808401	0.84021
P20155	ISK2	Serine protease inhibitor Kazal-type 2	seq.13405.61	OID30627	1	0.525755	0.540137	Y	Y	0.639717	0.479431	0.496154	0.396292	34.1525	1.83965e-07	Y	Y	0.482592	0.421603	0.659062	0.455531	35.6732	8.77976e-08	NA	NA	NA	NA	seq.13405.61	OID30627	0.505551	0.45713
Q08708	CLM6	CMRF35-like molecule 6	seq.13406.161	OID21010	2	-0.0458115	-0.00310889	N	N	0.00902173	0.0176416	-0.0960877	-0.061136	3.09732	0.376862	N	N	-0.106793	0.00402707	0.0852337	0.0631113	6.89518	0.0753148	NA	NA	0.64	NA	seq.5066.134	OID21010	0.630421	0.664473
Q8TEU8	WFKN2	WAP, Kazal, immunoglobulin, Kunitz and NTR domain-containing protein 2	seq.13408.23	OID20785	1	0.767757	0.786338	N	N	0.775315	0.752309	0.719765	0.777991	4.2206	0.238607	Y	N	0.753657	0.778151	0.824623	0.737503	10.2792	0.0163357	NA	NA	0.81	NA	seq.3235.50	OID20785	0.672111	0.629762
Q9H4P4	RNF41	E3 ubiquitin-protein ligase NRDP1	seq.13411.21	OID21179	1	0.373309	0.510918	Y	N	0.442681	0.251374	0.41997	0.333986	9.69097	0.0213842	N	N	0.552536	0.502059	0.537628	0.416275	4.95079	0.175436	NA	NA	NA	NA	seq.13411.21	OID21179	0.448902	0.543457
Q16206	ENOX2	Ecto-NOX disulfide-thiol exchanger 2	seq.13422.66	OID30152	1	-0.103003	0.129427	N	N	-0.175494	-0.0440431	-0.0270784	-0.0883345	4.84916	0.183182	N	N	0.215501	0.131672	0.0970791	0.119341	2.60486	0.456638	NA	NA	NA	NA	seq.13422.66	OID30152	-0.120272	0.232001
Q6UXL0	IL-20 Rb	Interleukin-20 receptor subunit beta	seq.13435.31	OID30461	1	0.0122166	0.00144703	N	N	0.0408396	0.0684305	-0.063999	0.0187258	2.65693	0.447597	N	N	-0.0881888	0.00442148	0.0314296	0.0806319	4.00275	0.261167	NA	NA	NA	NA	seq.13435.31	OID30461	-0.0140389	-0.00161889
Q15427	SF3B4	Splicing factor 3B subunit 4	seq.13449.25	OID21278	1	-0.11754	0.277531	N	N	-0.159064	-0.0751017	-0.0715026	-0.126307	1.85586	0.602855	N	N	0.328076	0.303002	0.288296	0.175367	4.02901	0.258349	NA	NA	NA	NA	seq.13449.25	OID21278	0.471623	0.531274
P40818	UBP8	Ubiquitin carboxyl-terminal hydrolase 8	seq.13450.49	OID20110	1	0.764017	0.776836	Y	N	0.782936	0.655333	0.794086	0.754783	13.7189	0.00331388	Y	N	0.805787	0.770549	0.79356	0.672756	13.5711	0.00355116	0.456	0.543	NA	NA	seq.13450.49	OID20110	0.631171	0.711661
O15335	CHAD	Chondroadherin	seq.13460.4	OID30660	1	0.827157	0.8426	Y	Y	0.794836	0.805674	0.903848	0.826978	31.3679	7.11154e-07	Y	Y	0.909476	0.84199	0.811105	0.827186	28.3927	3.0041e-06	NA	NA	NA	NA	seq.13460.4	OID30660	0.82331	0.831133
Q03431	PTH1R	Parathyroid hormone/parathyroid hormone-related peptide receptor	seq.13470.43	OID20571	1	-0.0364363	0.0373203	N	N	-0.064149	-0.0581767	-0.0298907	-0.0105822	1.0405	0.791454	N	N	-0.0109758	0.0431287	0.114871	0.0264198	3.05306	0.383516	0.03	0.044	NA	NA	seq.13470.43	OID20571	-0.0847719	-0.0244872
A8MVW0	F1712	Protein FAM171A2	seq.13479.8	OID31005	1	0.00547994	0.0103501	N	N	-0.0152209	0.125106	0.0777909	-0.0329517	6.30521	0.0976692	N	N	0.0117485	-0.0281919	-0.0057213	0.161412	6.77195	0.0795328	NA	NA	NA	NA	seq.13479.8	OID31005	-0.0167874	0.0235577
P02452	CO1A1:N-term propeptide	Collagen alpha-1(I) chain:N-term propeptide	seq.13484.69	OID20335	2	-0.0357806	0.0050311	N	N	-0.121001	0.0545202	-0.0477984	-0.0342602	4.9275	0.177184	N	N	0.0211216	-0.0193431	-0.0167779	0.0385125	0.871016	0.832416	-0.007	-0.025	NA	0.71, -0.06	seq.11140.56, seq.13484.69	OID20335, OID20335	0.641690141, -0.005133315	0.63963756, -0.068744342
Q13563	PKD2:CD 1	Polycystin-2:Cytoplasmic domain 1	seq.13486.9	OID30184	1	0.0625609	0.202024	Y	N	0.0881268	-0.0734093	0.150571	-0.00343603	9.02731	0.02893	N	N	0.272771	0.153983	0.242496	0.101713	6.54071	0.0880707	NA	NA	NA	NA	seq.13486.9, seq.13745.10	OID30184, OID30184	0.022561611, -0.124807624	0.071656736, 0.072433222
P53367	ARFP1	Arfaptin-1	seq.13488.3	OID31024	1	0.65798	0.665928	N	N	0.661897	0.602487	0.714818	0.629284	6.75756	0.0800402	N	N	0.717798	0.642208	0.665052	0.618625	5.31724	0.149987	NA	NA	NA	NA	seq.13488.3	OID31024	0.707129	0.764751
Q01581	HMCS1	Hydroxymethylglutaryl-CoA synthase, cytoplasmic	seq.13496.19	OID30157	1	-0.00474592	0.0145316	N	N	0.00350806	-0.0626486	-0.0053322	0.0237637	1.40488	0.704392	N	N	0.00057362	0.0485663	0.0180379	-0.0318195	1.4423	0.695651	NA	NA	NA	NA	seq.13496.19	OID30157	0.0610582	0.10667
Q01826	SATB1	DNA-binding protein SATB1	seq.13511.29	OID31038	1	0.0137525	0.156787	N	N	-0.00905085	0.0412595	-0.0212149	0.0199592	0.741203	0.863473	N	N	0.0653108	0.19133	0.199128	0.0468008	7.19655	0.0658901	NA	NA	NA	NA	seq.13511.29	OID31038	0.258235	0.287913
P62760	VISL1	Visinin-like protein 1	seq.13522.20	OID31105	2	0.0159434	0.0777034	N	N	0.0530746	-0.0189547	-0.115997	0.0451051	6.48566	0.0902298	N	N	-0.0166168	0.0986924	0.0853835	0.0301332	3.31124	0.346082	NA	NA	NA	NA	seq.13522.20	OID31105	0.0735843	0.110069
Q96MM7	H6ST2	Heparan-sulfate 6-O-sulfotransferase 2	seq.13524.25	OID30481	1	0.0586355	0.0230467	N	N	0.0731001	0.118921	0.0877686	0.0260577	2.16373	0.539127	N	N	0.0212384	0.00894799	0.0495733	0.126846	2.7322	0.434783	NA	NA	NA	NA	seq.13524.25	OID30481	0.0443039	0.00962806
P05455	LA:RRM	Lupus La protein:RNA recognition motif	seq.13526.5	OID20818	1	0.00172541	0.105507	N	N	0.0602025	-0.0750127	0.0440627	-0.0334977	4.40068	0.221322	N	N	0.0785202	0.0983685	0.156774	0.0565354	1.98902	0.574689	NA	NA	NA	NA	seq.13526.5, seq.13625.19	OID20818, OID20818	0.14079877, 0.021560232	0.179379833, 0.122767008
P54296	MYOM2	Myomesin-2	seq.13534.20	OID30131	1	0.480762	0.490845	N	N	0.487306	0.483484	0.362155	0.475264	4.88166	0.18067	N	N	0.380635	0.484108	0.499659	0.489828	4.33805	0.227198	NA	NA	NA	NA	seq.13534.20	OID30131	0.535671	0.538735
Q9Y5P4	C43BP:PH domain	Collagen type IV alpha-3-binding protein:PH domain	seq.13535.2	OID20857	2	0.565847	0.587918	Y	N	0.550553	0.381237	0.628939	0.586535	16.8413	0.00076188	Y	N	0.645443	0.613695	0.570815	0.418694	16.072	0.00109608	0.671	0.755	NA	NA	seq.13535.2, seq.13950.9	OID20857, OID20857	0.50110077, 0.324128404	0.575743933, 0.468993557
Q14914	LTB4DH	Prostaglandin reductase 1	seq.13543.7	OID30297	2	0.584654	0.531429	Y	N	0.559292	0.641419	0.680991	0.551483	11.8964	0.00774653	Y	N	0.665613	0.47925	0.515746	0.596546	19.0438	0.000267757	NA	NA	NA	NA	seq.19617.5	OID30297	0.518234	0.48732
Q92619	HMHA1	Rho GTPase-activating protein 45	seq.13544.9	OID30653	1	0.770281	0.782474	N	N	0.769607	0.709709	0.776897	0.767009	3.62593	0.304793	N	N	0.78545	0.780983	0.788187	0.718841	4.58932	0.20446	NA	NA	NA	NA	seq.13544.9	OID30653	0.583828	0.658516
Q9UH65	SWP70	Switch-associated protein 70	seq.13552.7	OID31477	1	0.405513	0.538909	N	N	0.41465	0.442963	0.45003	0.374775	2.5656	0.463553	N	N	0.564728	0.512973	0.577545	0.538342	2.95602	0.398456	NA	NA	NA	NA	seq.13552.7	OID31477	0.526066	0.661042
P09211	Glutathione S-transferase Pi	Glutathione S-transferase P	seq.13576.15	OID20876	2	0.0764714	0.147014	Y	N	0.133745	-0.0555917	0.172459	0.0626577	8.19967	0.0420605	N	N	0.196368	0.151782	0.174074	0.0462832	3.39978	0.333995	NA	NA	0.32	NA	seq.4911.49	OID20876	0.323926	0.387178
Q9Y3B8	ORN	Oligoribonuclease, mitochondrial	seq.13590.1	OID30075	1	0.0091446	0.0215291	N	N	0.0159539	-0.0676561	0.0333122	0.0211722	1.65846	0.646208	N	N	0.000991668	0.0364323	0.0298019	0.00533527	0.377234	0.944904	NA	NA	NA	NA	seq.13590.1	OID30075	0.153272	0.157862
Q9UJY5	GGA1	ADP-ribosylation factor-binding protein GGA1	seq.13594.158	OID20838	1	0.0851364	0.0888587	N	N	0.0381649	0.135075	0.0908767	0.0776637	1.50269	0.681649	N	N	0.117892	0.0720482	0.0501994	0.131416	1.46675	0.689965	NA	NA	NA	NA	seq.13594.158	OID20838	0.153885	0.140059
Q9BU02	THTPA	Thiamine-triphosphatase	seq.13595.20	OID31375	1	-0.1852	0.138575	N	N	-0.267339	-0.128142	-0.155834	-0.160973	4.85961	0.18237	N	N	0.163331	0.161622	0.0911073	0.183208	2.00203	0.571986	NA	NA	NA	NA	seq.13595.20	OID31375	-0.168954	0.258736
O00194	RB27B	Ras-related protein Rab-27B	seq.13596.3	OID30354	1	-0.18462	0.217404	N	N	-0.215638	-0.0523661	-0.116583	-0.165358	4.70024	0.19511	N	N	0.235745	0.246457	0.239048	0.245136	0.0377378	0.998072	NA	NA	NA	NA	seq.13596.3	OID30354	0.0525585	0.144568
Q7Z6M1	RABEK	Rab9 effector protein with kelch motifs	seq.13599.15	OID21163	1	-0.106439	0.0423317	N	N	-0.154485	-0.0960119	-0.135036	-0.0676718	2.67659	0.444221	N	N	-0.0173127	0.110463	-0.0198468	0.0402775	6.84482	0.0770118	NA	NA	NA	NA	seq.13599.15	OID21163	-0.0952869	0.203093
P55769	NH2L1	NHP2-like protein 1	seq.13602.6	OID30052	1	0.154153	0.151945	N	N	0.149397	0.123925	0.182647	0.168278	0.576687	0.901748	N	N	0.13194	0.166319	0.169849	0.155567	0.312757	0.957612	NA	NA	NA	NA	seq.13602.6	OID30052	0.381347	0.374791
Q9UJ72	ANX10	Annexin A10	seq.13605.16	OID20886	1	-0.0188412	0.0470252	N	N	-0.0149766	-0.069209	-0.0219175	0.0103719	1.2405	0.743309	N	N	-0.0339021	0.0878296	0.051621	-0.0489098	5.47336	0.140241	0.071	0.004	NA	NA	seq.13605.16	OID20886	0.0416527	0.0923634
O43639	NCK2	Cytoplasmic protein NCK2	seq.13615.60	OID20683	1	0.827663	0.840333	N	N	0.843211	0.769745	0.831057	0.820347	7.01619	0.0713834	Y	N	0.842977	0.835491	0.854007	0.775145	8.81306	0.0318824	NA	NA	NA	NA	seq.13615.60	OID20683	0.744224	0.796067
Q9Y6D9	MD1L1	Mitotic spindle assembly checkpoint protein MAD1	seq.13618.15	OID20904	1	-0.159618	0.208789	N	N	-0.211325	-0.110623	-0.122455	-0.160789	2.21048	0.529887	N	N	0.205208	0.251194	0.233012	0.166559	1.65882	0.646128	0.29	0.612	NA	NA	seq.13618.15	OID20904	0.0716699	0.388709
O43681	ASNA	ATPase ASNA1	seq.13620.10	OID30303	1	0.0889261	0.217946	N	N	0.147779	0.0892859	0.0822163	0.0675611	1.99027	0.574429	N	N	0.227141	0.209501	0.271329	0.158316	2.36393	0.500384	NA	NA	NA	NA	seq.13620.10	OID30303	0.348711	0.50523
Q15172	2A5A	Serine/threonine-protein phosphatase 2A 56 kDa regulatory subunit alpha isoform	seq.13622.16	OID31502	1	0.741264	0.755008	Y	Y	0.798952	0.557022	0.743335	0.725653	33.0128	3.20064e-07	Y	Y	0.752446	0.743701	0.804264	0.594813	27.1879	5.37676e-06	NA	NA	NA	NA	seq.13622.16	OID31502	0.67718	0.750583
O95544	NADK	NAD kinase	seq.13624.17	OID20178	1	0.403018	0.562829	Y	N	0.395418	0.502511	0.45418	0.318398	12.2779	0.00648945	N	N	0.535542	0.528821	0.550621	0.572059	0.830599	0.842135	0.298	0.592	NA	NA	seq.13624.17	OID20178	0.407856	0.49423
P05455	LA:HTH	Lupus La protein:HTH La-type RNA-binding domain	seq.13625.19	OID20818	2	-0.0381081	0.0841453	N	N	-0.0233427	-0.0609344	-0.00880022	-0.0570243	0.748326	0.861782	N	N	0.0443951	0.0849404	0.117848	0.075264	0.957409	0.811556	NA	NA	NA	NA	seq.13526.5, seq.13625.19	OID20818, OID20818	0.14079877, 0.021560232	0.179379833, 0.122767008
O60763	USO1	General vesicular transport factor p115	seq.13639.101	OID21367	1	0.702597	0.715533	N	N	0.730756	0.653406	0.73036	0.674961	6.39041	0.0940863	N	N	0.735209	0.700949	0.732156	0.6681	3.45172	0.327078	NA	NA	NA	NA	seq.13639.101	OID21367	0.693451	0.732855
O14879	CIG49	Interferon-induced protein with tetratricopeptide repeats 3	seq.13642.90	OID31283	1	0.136544	0.195236	N	N	0.152525	0.169283	0.23644	0.102238	4.38746	0.222551	N	N	0.271998	0.171793	0.228564	0.160706	3.15706	0.368038	NA	NA	NA	NA	seq.13642.90	OID31283	0.51096	0.559904
O14964	HGS	Hepatocyte growth factor-regulated tyrosine kinase substrate	seq.13644.30	OID21175	1	0.556935	0.609058	N	N	0.595037	0.474077	0.595167	0.538701	5.81781	0.120819	N	N	0.649392	0.594855	0.640398	0.532662	5.76236	0.123762	NA	NA	NA	NA	seq.13644.30	OID21175	0.401092	0.526337
Q9NRA1	PDGF-CC	Platelet-derived growth factor C	seq.13658.31	OID21183	1	0.0713227	0.0809905	N	N	0.0886612	0.0502911	0.0568252	0.0716685	0.292159	0.961496	N	N	0.0452065	0.0956303	0.1207	0.041661	1.53206	0.674891	0.037	0.122	0.04	-0.06	seq.13658.31	OID21183	0.0496676	0.132216
O15123	Angiopoietin-2	Angiopoietin-2	seq.13660.76	OID21463	2	0.734905	0.80477	N	N	0.709801	0.716061	0.728252	0.723473	0.336327	0.953058	N	N	0.793139	0.795014	0.796136	0.774504	0.581976	0.900546	NA	NA	0.76	NA	seq.2602.2	OID21463	0.748967	0.801108
P28325	CYTD	Cystatin-D	seq.13661.193	OID20995	2	0.0528477	0.0614838	N	N	0.0711636	0.100169	0.108778	-0.0232437	6.23069	0.100911	N	N	0.0922107	-0.0209622	0.0999616	0.0737133	6.0395	0.109704	NA	NA	0.84	0.87	seq.3803.10	OID20995	0.82599	0.867542
P05112	IL-4	Interleukin-4	seq.13663.2	OID20426	2	-0.0338418	0.0168992	N	N	0.00113745	-0.0213504	-0.0110434	-0.0378346	0.50025	0.918836	N	N	0.037192	0.0295895	0.0307547	0.00450684	0.15479	0.984535	NA	NA	0.02	-0.13	seq.2906.55	OID20426	-0.00332922	-0.00533579
Q06418	Dtk	Tyrosine-protein kinase receptor TYRO3	seq.13668.44	OID20161	2	0.108674	0.164296	N	N	0.0893607	0.198875	0.158444	0.076888	3.77441	0.286876	N	N	0.221482	0.123327	0.156837	0.196081	2.69036	0.441869	NA	NA	0.18	NA	seq.2611.72	OID20161	0.309824	0.220001
P09529	Inhibin bB chain	Inhibin beta B chain	seq.13676.46	OID30625	1	0.743268	0.794153	N	N	0.703492	0.725278	0.77803	0.751098	5.53654	0.13647	N	N	0.795588	0.809533	0.769684	0.792282	3.39314	0.334889	NA	NA	NA	NA	seq.8467.9, seq.13676.46, seq.16746.12	OID30625, OID30625, OID30625	0.26669151, 0.71318975, -0.052296052	0.256889898, 0.783157764, 0.022344669
P00746	Factor D	Complement factor D	seq.13678.169	OID30738	2	0.132064	0.274181	Y	N	0.155964	0.0787387	0.295388	0.100211	9.84681	0.0199142	Y	N	0.393386	0.272907	0.324566	0.152495	9.50763	0.0232503	NA	NA	NA	NA	seq.2946.52	OID30738	0.548083	0.58275
P07333	M-CSF R	Macrophage colony-stimulating factor 1 receptor	seq.13682.47	OID30681	1	0.797258	0.786348	Y	N	0.788401	0.827219	0.726515	0.804139	10.0711	0.0179714	Y	N	0.714045	0.781057	0.790399	0.818872	9.14876	0.0273771	NA	NA	NA	NA	seq.13682.47	OID30681	0.74394	0.73788
Q01344	IL-5 Ra	Interleukin-5 receptor subunit alpha	seq.13686.2	OID20601	1	0.779412	0.806465	Y	N	0.787132	0.812383	0.81659	0.745117	11.0031	0.0117093	Y	N	0.832242	0.772458	0.833637	0.823615	12.8298	0.00501951	0.792	0.79	0.79	NA	seq.13686.2	OID20601	0.788721	0.787288
P21810	BGN	Biglycan	seq.13690.26	OID21198	2	0.10913	0.0645161	N	N	0.0976032	0.00593408	0.11107	0.137056	3.26017	0.353225	N	N	0.123459	0.0785911	0.0230307	0.0086043	2.62446	0.453218	NA	NA	0.25	NA	seq.3284.75	OID21198	0.393794	0.219647
O95388	WISP-1	WNT1-inducible-signaling pathway protein 1	seq.13692.154	OID21444	1	0.242798	0.298586	Y	N	0.411025	0.212074	0.171364	0.20971	18.2394	0.000392576	Y	N	0.191304	0.278197	0.46279	0.279217	19.9713	0.00017208	0.688	0.703	-0.09	NA	seq.13692.154, seq.3057.55	OID21444, OID21444	0.51529304, 0.10501331	0.561986609, 0.19744513
Q49AH0	ARMEL	Cerebral dopamine neurotrophic factor	seq.13693.5	OID21318	2	-0.12892	0.042609	N	N	-0.155158	-0.0272602	-0.0771721	-0.155691	4.15097	0.245617	N	N	0.132509	0.0235905	0.0962148	0.0193873	3.641	0.302931	NA	NA	0.63	NA	seq.4962.52	OID21318	0.391805	0.595756
P21695	GPDA	Glycerol-3-phosphate dehydrogenase [NAD(+)], cytoplasmic	seq.13697.51	OID31358	1	0.611117	0.628175	N	N	0.593162	0.672558	0.653838	0.585057	5.75357	0.124235	N	N	0.655091	0.599047	0.628419	0.673838	3.9646	0.265312	NA	NA	NA	NA	seq.13697.51	OID31358	0.278028	0.320263
P07288	PSA	Prostate-specific antigen	seq.13699.6	OID30364	4	0.61292	0.608049	Y	N	0.494513	0.580288	0.626059	0.671946	22.9347	4.1669e-05	Y	N	0.62929	0.657888	0.511807	0.572264	16.0284	0.0011189	NA	NA	NA	NA	seq.8468.19	OID30364	0.768139	0.774111
P07355	annexin II	Annexin A2	seq.13700.10	OID30263	1	0.581541	0.651311	N	N	0.575577	0.563343	0.571996	0.564983	0.0936774	0.992585	N	N	0.645749	0.637102	0.649146	0.636888	0.154347	0.984599	NA	NA	NA	NA	seq.13700.10, seq.4961.17	OID30263, OID30263	0.706980132, 0.699370895	0.785336536, 0.729413849
O43927	BLC	C-X-C motif chemokine 13	seq.13701.2	OID21024	2	0.609172	0.68723	N	N	0.636469	0.672034	0.644867	0.591676	4.4916	0.213041	N	N	0.702711	0.672927	0.711997	0.716165	2.51488	0.472608	NA	NA	0.68	NA	seq.3487.32	OID21024	0.614036	0.650381
P42701	IL-12 Rb1	Interleukin-12 receptor subunit beta-1	seq.13706.12	OID20486	1	0.00392974	0.0861682	N	N	0.0185712	0.0917151	0.090191	-0.0175909	3.86414	0.276513	N	N	0.120132	0.0982556	0.0467693	0.119571	1.33733	0.720289	NA	NA	0.08	NA	seq.2632.5	OID20486	0.0160471	0.087078
Q14515	SPARCL1	SPARC-like protein 1	seq.13707.27	OID20361	2	0.402283	0.45298	N	N	0.364335	0.412404	0.439055	0.412549	1.55865	0.668801	N	N	0.41012	0.471337	0.456426	0.341612	5.05015	0.168162	NA	NA	0.37	0.5	seq.4467.49	OID20361	0.503951	0.535457
O60259	kallikrein 8	Kallikrein-8	seq.13708.56	OID21517	1	0.722885	0.780217	N	N	0.716833	0.760785	0.693109	0.726107	2.70715	0.439013	Y	N	0.71406	0.778564	0.815051	0.780748	10.2343	0.016676	NA	NA	0.74	NA	seq.2834.54	OID21517	0.67489	0.708757
P05155	C1-Esterase Inhibitor	Plasma protease C1 inhibitor	seq.13710.6	OID30777	2	0.273417	0.387194	N	N	0.284933	0.249752	0.214398	0.291614	1.66055	0.64574	N	N	0.347364	0.398882	0.410363	0.316359	2.56323	0.463973	NA	NA	NA	NA	seq.4479.14	OID30777	0.308966	0.365211
P12544	granzyme A	Granzyme A	seq.13712.104	OID20663	2	0.0638993	0.201237	N	N	0.0591549	0.00931219	0.014177	0.0689551	1.10224	0.776533	N	N	0.107917	0.208592	0.199999	0.142112	2.81273	0.421409	NA	NA	0.75	NA	seq.3440.7	OID20663	0.615378	0.69828
Q15485	FCN2	Ficolin-2	seq.13717.15	OID20382	1	0.786036	0.823276	N	N	0.795248	0.783112	0.810021	0.774899	2.2344	0.525205	N	N	0.830854	0.814861	0.843891	0.799143	3.8944	0.273096	0.783	0.804	0.68	0.77, 0.68	seq.13717.15, seq.3313.21	OID20382, OID20382	0.562714466, 0.369883217	0.676145445, 0.460316031
O96013	PAK4	Serine/threonine-protein kinase PAK 4	seq.13719.19	OID20819	1	0.528724	0.546843	N	N	0.528377	0.400994	0.557832	0.523576	6.03739	0.109805	N	N	0.574977	0.53668	0.545611	0.463039	3.11377	0.374414	0.634	0.722	NA	NA	seq.13719.19	OID20819	0.552026	0.626356
P24158	Proteinase-3	Myeloblastin	seq.13720.95	OID20329	2	0.656575	0.692239	N	N	0.648533	0.603655	0.707814	0.666265	4.50922	0.211469	N	N	0.725138	0.712637	0.687994	0.617537	6.40568	0.0934573	0.731	0.758	0.81	0.74	seq.13720.95	OID20329	0.556771	0.555153
P02748	C9	Complement component C9	seq.13722.105	OID30698	1	0.601132	0.577146	Y	N	0.572937	0.643516	0.701556	0.564386	13.2085	0.00420672	Y	N	0.664802	0.539755	0.567239	0.613585	9.19208	0.0268431	NA	NA	NA	NA	seq.3060.43	OID30698	0.546842	0.59887
P22301	IL-10	Interleukin-10	seq.13723.6	OID20431	1	-0.0108981	0.0221704	N	N	0.0280692	-0.123919	-0.0086533	-0.0188423	3.53602	0.31612	N	N	0.0613933	0.00494689	0.0629749	-0.0786706	3.69633	0.296177	NA	NA	-0.01	-0.05	seq.2773.50	OID20431	-0.0642296	-0.00200053
O95750	FGF-19	Fibroblast growth factor 19	seq.13724.27	OID20715	2	0.839243	0.836359	Y	Y	0.832954	0.86139	0.914823	0.817203	36.8369	4.98184e-08	Y	Y	0.908356	0.812674	0.838658	0.852768	31.5518	6.50479e-07	0.89	0.932	0.91	0.94	seq.13724.27	OID20715	0.88276	0.901266
O43320	FGF-16	Fibroblast growth factor 16	seq.13725.3	OID30535	1	0.0166681	0.0326549	N	N	0.0669924	-0.0638855	0.00909519	0.0175151	2.60478	0.456652	N	N	0.0404902	0.0298433	0.049423	0.0444635	0.13066	0.98792	NA	NA	NA	NA	seq.4393.3	OID30535	0.117699	0.168259
P33681	B7	T-lymphocyte activation antigen CD80	seq.13726.4	OID30291	2	0.00442238	0.0687319	N	N	0.0310118	0.0175805	-0.0031773	-0.0193126	0.840959	0.839647	N	N	0.0548216	0.0448922	0.0796468	0.0921044	0.629892	0.889557	NA	NA	NA	NA	seq.13726.4	OID30291	0.0533211	0.0916026
P30040	ERP29	Endoplasmic reticulum resident protein 29	seq.13728.19	OID30578	1	0.835915	0.838796	N	N	0.846315	0.7836	0.848687	0.826041	6.62323	0.0849272	N	N	0.853809	0.829004	0.84867	0.785241	7.23523	0.0647663	NA	NA	NA	NA	seq.13728.19	OID30578	0.568483	0.592895
P53634	CATC	Dipeptidyl peptidase 1	seq.13730.18	OID20679	1	0.436435	0.459085	N	N	0.504284	0.384087	0.376494	0.420158	5.89214	0.116977	N	N	0.403262	0.447875	0.519335	0.39296	5.5726	0.134361	NA	NA	0.02	NA	seq.3178.5	OID20679	-0.0132256	0.231339
P10643	C7	Complement component C7	seq.13731.14	OID30766	1	0.743483	0.704426	Y	N	0.710184	0.825514	0.727855	0.707912	16.3866	0.00094472	Y	N	0.668543	0.666557	0.676806	0.798174	16.2	0.00103178	NA	NA	NA	NA	seq.2888.49	OID30766	0.401021	0.55602
Q16619	Cardiotrophin-1	Cardiotrophin-1	seq.13732.79	OID20061	1	0.0433382	0.140675	N	N	0.0848824	-0.0616709	-0.009329	0.0470484	3.90247	0.27219	N	N	0.114316	0.142586	0.18036	0.030789	3.63339	0.30387	NA	NA	0.19	NA	seq.2889.37	OID20061	0.608261	0.62341
P29460	IL-12 p40	Interleukin-12 subunit beta	seq.13733.5	OID20666	1	0.735357	0.7548	N	N	0.728884	0.637956	0.754589	0.725313	7.16731	0.0667519	N	N	0.757996	0.752533	0.757965	0.661565	7.19154	0.066037	0.749	0.762	0.83, 0.81, 0.06, 0.06	0.84	seq.10365.132, seq.10365.132, seq.10367.62, seq.13733.5, seq.13733.5	OID20666, OID21327, OID20666, OID20666, OID21327	0.815271018, 0.801409226, 0.005927916, 0.788480068, 0.781104784	0.762666569, 0.763645553, 0.06005671, 0.710967277, 0.715452218
Q8IU54	IFN-lambda 1	Interferon lambda-1	seq.13734.22	OID20795	1	0.196453	0.201484	N	N	0.199501	0.239723	0.227231	0.163663	1.76854	0.621804	N	N	0.182633	0.189351	0.259035	0.26689	2.62153	0.453728	NA	NA	-0.04	NA	seq.4396.54	OID20795	-0.00795416	0.0224077
Q92765	sFRP-3	Secreted frizzled-related protein 3	seq.13740.51	OID20968	1	0.662751	0.670336	Y	N	0.593435	0.56936	0.689771	0.65451	8.02012	0.0455976	N	N	0.697817	0.656283	0.616641	0.57055	7.05919	0.0700349	0.796	0.823	0.56	NA	seq.13740.51	OID20968	0.612517	0.595388
P08833	IGFBP-1	Insulin-like growth factor-binding protein 1	seq.13741.36	OID20246	1	0.898628	0.909141	N	N	0.882827	0.884565	0.907034	0.894483	2.92317	0.403624	N	N	0.912211	0.909674	0.891664	0.888051	4.81722	0.185681	NA	NA	0.89	0.79	seq.2771.35	OID20246	0.890732	0.908036
Q9GZX6	IL-22	Interleukin-22	seq.13742.66	OID31407	2	0.261903	0.255034	Y	N	0.304802	0.11603	0.18333	0.286662	8.66013	0.0341682	N	N	0.194466	0.272795	0.293285	0.103367	7.66547	0.0534558	NA	NA	NA	NA	seq.2778.10	OID31407	0.581146	0.487926
P26951	IL-3 Ra	Interleukin-3 receptor subunit alpha	seq.13744.37	OID20461	1	0.568166	0.599807	N	N	0.579054	0.620122	0.58635	0.547852	2.59217	0.458863	N	N	0.58736	0.59758	0.593755	0.672697	3.46333	0.32555	0.588	0.814	0.13	NA	seq.13744.37	OID20461	0.563748	0.644007
Q13563	PKD2:CD 4	Polycystin-2:Cytoplasmic domain 4	seq.13745.10	OID30184	2	-0.258205	0.120728	N	N	-0.224684	-0.207499	-0.269238	-0.248157	0.717762	0.869019	N	N	0.118424	0.152669	0.158186	0.115893	0.536899	0.910713	NA	NA	NA	NA	seq.13486.9, seq.13745.10	OID30184, OID30184	0.022561611, -0.124807624	0.071656736, 0.072433222
P23280	Carbonic anhydrase 6	Carbonic anhydrase 6	seq.13747.9	OID21096	2	0.829042	0.8377	N	N	0.851783	0.802548	0.811389	0.824764	4.95335	0.175245	N	N	0.825819	0.826837	0.862104	0.81084	6.24792	0.100152	NA	NA	0.93	NA	seq.3352.80	OID21096	0.787185	0.788169
P80075	MCP-2	C-C motif chemokine 8	seq.13748.4	OID21466	1	0.678103	0.748314	Y	Y	0.692064	0.67761	0.805417	0.614504	34.2049	1.79335e-07	Y	Y	0.844561	0.687697	0.786556	0.746876	38.1776	2.5921e-08	0.758	0.859	0.39	0.79	seq.13748.4	OID21466	0.745003	0.811827
O00233	PSMD9	26S proteasome non-ATPase regulatory subunit 9	seq.13931.22	OID21304	1	0.533416	0.61338	Y	N	0.64512	0.410507	0.495328	0.510127	20.3171	0.000145899	Y	N	0.573288	0.612981	0.687761	0.465568	18.3523	0.000372051	NA	NA	NA	NA	seq.13931.22	OID21304	0.703293	0.787666
Q9C005	DPY30	Protein dpy-30 homolog	seq.13943.38	OID21410	1	0.623784	0.706601	N	N	0.67731	0.617044	0.630891	0.600791	5.07432	0.166435	N	N	0.687894	0.698399	0.743679	0.680433	3.85862	0.27714	NA	NA	NA	NA	seq.13943.38	OID21410	0.544402	0.700406
Q9Y5P4	C43BP:START domain	Collagen type IV alpha-3-binding protein:StAR-related lipid-transfer domain, isoform 2	seq.13950.9	OID20857	1	0.574961	0.60629	Y	N	0.5611	0.405733	0.645334	0.579698	14.8973	0.00190658	Y	N	0.667012	0.618131	0.583333	0.455669	13.7537	0.00326029	0.634	0.739	NA	NA	seq.13535.2, seq.13950.9	OID20857, OID20857	0.50110077, 0.324128404	0.575743933, 0.468993557
P28838	LAP	Cytosol aminopeptidase	seq.13959.7	OID20436	1	0.494911	0.5187	Y	N	0.438212	0.40808	0.625107	0.487718	14.9813	0.00183267	Y	N	0.624488	0.520949	0.457659	0.431363	12.4311	0.00604333	NA	NA	NA	NA	seq.13959.7, seq.15610.72	OID20436, OID20436	0.541290502, 0.581976224	0.616177991, 0.627674711
Q5VTT5	MYOM3	Myomesin-3	seq.13966.30	OID30633	1	0.512153	0.460798	Y	N	0.586266	0.378196	0.442564	0.49566	13.2853	0.00405862	Y	N	0.418749	0.41315	0.52811	0.348954	9.56852	0.0226134	NA	NA	NA	NA	seq.13966.30	OID30633	0.352033	0.23971
Q16881	Thioredoxin reductase 1	Thioredoxin reductase 1, cytoplasmic	seq.13967.14	OID21135	1	0.772004	0.790604	N	N	0.778381	0.780549	0.765494	0.744943	2.63996	0.450527	N	N	0.785145	0.760636	0.806416	0.798591	4.94521	0.175853	NA	NA	NA	NA	seq.13967.14	OID21135	0.733692	0.743771
Q9BPX1	DHB14	17-beta-hydroxysteroid dehydrogenase 14	seq.13972.4	OID31098	1	0.117672	0.138974	N	N	0.140953	0.0789094	0.108429	0.129147	0.694327	0.874538	N	N	0.177857	0.165291	0.146949	0.0588731	2.39711	0.494173	NA	NA	NA	NA	seq.13972.4	OID31098	0.181378	0.135911
Q92888	ARHG1	Rho guanine nucleotide exchange factor 1	seq.13976.9	OID31133	1	0.553176	0.625757	Y	N	0.539736	0.442388	0.622365	0.554383	8.14442	0.0431194	Y	N	0.694216	0.637421	0.609292	0.504778	11.997	0.00739341	NA	NA	NA	NA	seq.13976.9	OID31133	0.608817	0.68335
Q9UHL0	DDX25	ATP-dependent RNA helicase DDX25	seq.13984.23	OID30892	1	0.00945103	0.020441	N	N	-0.0075142	0.104709	-0.0356922	0.0207644	2.80467	0.422731	N	N	-0.0544431	0.0652236	-0.0474805	0.100022	6.83928	0.0772008	NA	NA	NA	NA	seq.13984.23	OID30892	0.0300121	0.00668436
O43432	IF4G3	Eukaryotic translation initiation factor 4 gamma 3	seq.13991.47	OID31022	1	-0.0636021	0.155947	N	N	-0.0794185	-0.0786312	0.0346601	-0.0761162	2.94891	0.39957	N	N	0.249438	0.160605	0.178941	0.0467466	5.51346	0.137836	NA	NA	NA	NA	seq.13991.47	OID31022	0.161083	0.206396
Q96CD2	COAC	Phosphopantothenoylcysteine decarboxylase	seq.13996.16	OID21027	1	-0.194841	0.214066	N	N	-0.187171	-0.199565	-0.188466	-0.191521	0.0271181	0.998822	N	N	0.261947	0.233697	0.211771	0.152904	1.85407	0.603239	NA	NA	NA	NA	seq.13996.16	OID21027	0.418511	0.513249
Q9BZ29	DOCK9	Dedicator of cytokinesis protein 9	seq.14002.18	OID30836	1	0.0081899	-0.00275287	N	N	0.0615544	0.00927694	0.0373632	-0.0147661	1.9183	0.589535	N	N	0.0392484	-0.0165497	0.0300996	0.00775274	1.03276	0.793325	NA	NA	NA	NA	seq.14002.18	OID30836	-0.0486114	0.007587
P31949	S100A11	Protein S100-A11	seq.14011.17	OID20130	1	0.181801	0.36388	N	N	0.187298	0.16833	0.167438	0.211453	0.698329	0.873597	N	N	0.294911	0.377091	0.399055	0.29942	3.78227	0.285956	0.069	0.47	NA	NA	seq.14011.17	OID20130	0.26115	0.405193
Q92844	TANK	TRAF family member-associated NF-kappa-B activator	seq.14013.11	OID20474	1	0.245229	0.290311	N	N	0.274777	0.141077	0.318898	0.241507	4.8557	0.182674	N	N	0.366718	0.302287	0.298811	0.143226	7.65702	0.0536582	0.143	0.272	NA	NA	seq.14013.11	OID20474	0.271786	0.354529
Q92817	EVPL	Envoplakin	seq.14019.73	OID31309	1	-0.00686003	0.0108819	N	N	-0.0225501	-0.021245	-0.0180864	-0.00954901	0.0640882	0.995767	N	N	0.0360708	-0.00643682	0.0683511	-0.0102792	1.93798	0.585378	NA	NA	NA	NA	seq.14019.73	OID31309	0.0171752	0.023663
Q07011	4-1BB	Tumor necrosis factor receptor superfamily member 9	seq.14025.18	OID20985	2	0.0386126	0.116985	N	N	-0.00919268	-0.0169885	-0.0502832	0.0646556	3.91159	0.27117	N	N	0.0585743	0.167106	0.157082	0.065183	3.99401	0.262112	0.016	0.16	0.49	0.26	seq.14025.18	OID20985	0.0953734	0.127698
Q96PD4	IL-17F	Interleukin-17F	seq.14026.24	OID20456	2	-0.00984425	0.0209209	N	N	-0.0445179	-0.066849	-0.0687599	0.0332873	3.95712	0.266131	N	N	-0.0542977	0.0283035	0.044501	0.0183955	1.83956	0.606364	NA	NA	0.04	NA	seq.14026.24	OID20456	-0.000408716	0.0422936
P21781	FGF7	Fibroblast growth factor 7	seq.14031.18	OID31241	1	0.0514216	0.0832172	N	N	0.113119	0.0696534	-0.0188324	0.0372027	3.30306	0.347218	N	N	-0.0102741	0.100534	0.14675	0.0171442	5.49302	0.139057	NA	NA	NA	NA	seq.4487.1	OID31241	0.0156125	0.00804938
P15692	VEGF121	Vascular endothelial growth factor A, isoform 121	seq.14032.2	OID20650	1	0.256773	0.432423	N	N	0.307433	0.300405	0.359434	0.209787	7.47859	0.0581111	N	N	0.50231	0.43408	0.442072	0.411802	2.04675	0.56276	NA	NA	0.37, 0.27	0.2, 0.52, 0.18	seq.19437.61, seq.2597.8, seq.4867.15	OID20650, OID20650, OID20650	0.721923057, 0.3914258, 0.699661673	0.733495442, 0.665695416, 0.720457318
P09758	GA733-1 protein	Tumor-associated calcium signal transducer 2	seq.14034.22	OID21447	1	-0.0287608	-0.0238091	N	N	-0.0609928	0.010313	-0.0255668	0.00749012	1.56762	0.666753	Y	N	-0.0715939	-0.0460362	0.121808	0.020834	10.0169	0.0184226	0.019	0.019	-0.01	NA	seq.14034.22, seq.2619.72	OID21447, OID21447	-0.035366178, -0.061720262	-0.049955549, -0.067102767
O76096	CYTF	Cystatin-F	seq.14038.130	OID20704	1	0.826221	0.859656	Y	Y	0.875929	0.794148	0.712886	0.806454	38.66	2.04869e-08	Y	Y	0.775469	0.848292	0.898045	0.81801	34.5795	1.49475e-07	NA	NA	0.76	NA	seq.3302.58	OID20704	0.798616	0.79449
P10144	Granzyme B	Granzyme B	seq.14041.13	OID20604	1	0.369801	0.468432	Y	N	0.230006	0.433727	0.489064	0.386982	17.8894	0.000463572	N	N	0.525511	0.47986	0.403546	0.447	4.72815	0.192821	NA	NA	0.31	NA	seq.4133.54	OID20604	0.486118	0.493075
Q8N474	SARP-2	Secreted frizzled-related protein 1	seq.14042.11	OID20984	2	0.547148	0.523586	N	N	0.547197	0.575468	0.522192	0.519089	1.44045	0.69608	N	N	0.514369	0.492942	0.484071	0.537525	0.978345	0.806492	NA	NA	0.46	NA	seq.3221.54	OID20984	0.653214	0.692587
P23560	BDNF	Brain-derived neurotrophic factor	seq.14047.78	OID30373	1	0.848323	0.852068	Y	Y	0.892568	0.780459	0.83416	0.829839	27.793	4.01414e-06	Y	Y	0.833931	0.834887	0.894017	0.787484	26.3398	8.09589e-06	NA	NA	NA	NA	seq.14047.78, seq.2421.7	OID30373, OID30373	0.789284096, 0.735344621	0.792260753, 0.737748394
Q9NPH3	IL-1 R AcP	Interleukin-1 Receptor accessory protein	seq.14048.7	OID21126	1	0.785213	0.774316	Y	Y	0.769273	0.793197	0.628283	0.799248	27.9735	3.6789e-06	Y	N	0.648485	0.778725	0.766202	0.771074	15.9059	0.00118549	NA	NA	0.78	NA	seq.14048.7	OID21126	0.742501	0.749551
P13232	IL-7	Interleukin-7	seq.14049.17	OID20535	1	0.215499	0.403696	Y	N	0.192282	0.213342	0.33115	0.132894	9.64554	0.0218324	Y	N	0.548939	0.34328	0.399355	0.412494	14.3211	0.00249912	NA	NA	0.01	-0.03	seq.4140.3	OID20535	0.100981	0.430001
P52798	Ephrin-A4	Ephrin-A4	seq.14050.61	OID20935	2	0.270103	0.318068	N	N	0.235747	0.213647	0.251403	0.230692	0.208535	0.9762	N	N	0.24169	0.31071	0.351645	0.223079	4.22954	0.237721	NA	NA	0.59	NA	seq.2614.28	OID20935	0.45255	0.525356
Q13261	IL-15 Ra	Interleukin-15 receptor subunit alpha	seq.14054.17	OID20498	1	0.554028	0.611958	N	N	0.491012	0.524472	0.601466	0.527363	4.27687	0.233077	N	N	0.647462	0.586601	0.574879	0.58863	2.58144	0.460752	0.321	0.599	0.52	0.43, 0.26	seq.14054.17, seq.3445.53	OID20498, OID20498	0.526187419, 0.16355208	0.613760891, 0.116777126
P01215	Glycoprotein hormones a-chain	Glycoprotein hormones alpha chain	seq.14056.4	OID21069	1	0.258872	0.250052	N	N	0.280024	0.29997	0.257297	0.235505	1.25359	0.740182	Y	N	0.211865	0.189305	0.318129	0.388431	12.0913	0.00707671	0.301	0.049	0.84, 0.83, 0.67, 0	NA	seq.2953.31, seq.3032.11, seq.3521.16, seq.4914.10, seq.14056.4	OID21069, OID21069, OID21069, OID21069, OID21069	0.678966645, 0.761507296, 0.055252296, 0.640098433, 0.389938246	0.67605942, 0.761185923, 0.059924472, 0.626497501, 0.216779017
O14788	sRANKL	Tumor necrosis factor ligand superfamily member 11	seq.14061.48	OID20592	2	0.0324738	0.0685382	N	N	0.0681463	0.0488317	-0.0280473	-0.0212959	3.12178	0.373227	N	N	-0.014159	0.0546019	0.0881559	0.0879961	2.04395	0.563335	0.063	0.136	-0.04	0.04	seq.14061.48	OID20592	0.0244365	0.0188514
P13725	OSM	Oncostatin-M	seq.14063.17	OID20574	1	0.0103378	0.181848	N	N	0.0293792	0.082382	0.00137414	-0.0174826	2.08693	0.554561	N	N	0.111262	0.208662	0.200994	0.165966	2.3204	0.508625	0.286	0.269	-0.08	0.2, -0.07	seq.14063.17, seq.2693.20	OID20574, OID20574	0.422762163, 0.014876941	0.396996759, 0.100689406
O75594	PGRP-S	Peptidoglycan recognition protein 1	seq.14064.21	OID20338	2	-0.057633	0.122071	N	N	-0.129504	-0.0649878	-0.0916875	-0.0557039	1.73958	0.628169	N	N	0.156565	0.161793	0.102797	0.142404	1.11801	0.772727	NA	NA	0.71	0.55	seq.3329.14	OID20338	0.540016	0.576565
P06127	CD5:CD	T-cell surface glycoprotein CD5:Cytoplasmic domain	seq.14065.11	OID21449	2	-0.0961917	0.111366	N	N	-0.0449352	-0.172442	-0.0837828	-0.0916505	2.51332	0.47289	N	N	0.0508152	0.1413	0.0914785	0.0782149	2.30472	0.511617	-0.157	0.186	NA	-0.14, 0.11	seq.14065.11, seq.5596.75	OID21449, OID21449	-0.174912615, 0.029035128	0.19239458, 0.254124275
O15444	TECK	C-C motif chemokine 25	seq.14068.29	OID20674	1	0.497183	0.510217	Y	N	0.565262	0.498693	0.44702	0.44148	8.88546	0.0308532	Y	N	0.449875	0.452339	0.601226	0.464412	14.1926	0.00265435	NA	NA	0.58	0.34	seq.2705.5	OID20674	0.370234	0.381574
P22748	Carbonic Anhydrase IV	Carbonic anhydrase 4	seq.14069.61	OID20241	2	-0.0414221	0.0100136	N	N	-0.103794	0.018451	0.00674103	-0.0614187	3.34806	0.34101	N	N	0.0334331	0.0044736	-0.0281227	0.0733009	1.73006	0.630271	0.054	0.018	0.06	-0.04	seq.14069.61	OID20241	-0.0203034	0.0138226
P13693	TCTP	Translationally-controlled tumor protein	seq.14072.9	OID20476	2	0.0151635	0.0301712	N	N	0.0185444	0.0827031	0.0638416	-0.0145369	2.52489	0.47081	N	N	0.0229013	0.0143493	0.0430021	0.0819276	0.935698	0.816806	NA	NA	0.12	NA	seq.3872.2	OID20476	0.207265	0.224504
P47992	Lymphotactin	Lymphotactin	seq.14078.69	OID21398	1	0.558078	0.599543	Y	N	0.515544	0.602341	0.668044	0.511333	14.894	0.00190954	N	N	0.667877	0.570116	0.563265	0.632637	7.15955	0.0669826	NA	NA	0.21	0	seq.4143.74	OID21398	-0.00901424	0.0390575
Q13478	IL-18 Ra	Interleukin-18 receptor 1	seq.14079.14	OID20652	2	0.683334	0.761108	N	N	0.646084	0.698371	0.633051	0.665709	2.09745	0.552428	N	N	0.728146	0.742505	0.747574	0.763582	0.835426	0.840976	0.571	0.843	0.79	0.74	seq.14079.14	OID20652	0.61709	0.76359
P35225	IL-13	Interleukin-13	seq.14085.28	OID20430	2	-0.0238285	-0.0042135	N	N	-0.0065453	-0.0635833	-0.0314914	-0.0247574	0.49816	0.919295	N	N	0.00497162	-0.0261919	0.0286451	-0.0105234	0.941286	0.815455	NA	NA	-0.04	0.01	seq.3072.4	OID20430	-0.0385991	-0.00822807
Q92484	ASM3A	Acid sphingomyelinase-like phosphodiesterase 3a	seq.14086.11	OID20676	1	0.824858	0.842176	Y	N	0.788849	0.774589	0.797935	0.85784	22.8325	4.37619e-05	Y	N	0.812517	0.867727	0.82833	0.773438	20.927	0.000109014	NA	NA	0.22	NA	seq.4771.10	OID20676	0.250023	0.184895
P24592	IGFBP-6	Insulin-like growth factor-binding protein 6	seq.14088.38	OID20413	2	0.523805	0.660808	N	N	0.503914	0.498175	0.603479	0.489107	5.86204	0.118519	Y	N	0.701569	0.668817	0.640923	0.54423	9.75239	0.0207925	0.44	0.587	0.78	0.58	seq.14088.38	OID20413	0.44247	0.606081
P49771	Flt3 ligand	Fms-related tyrosine kinase 3 ligand	seq.14093.10	OID20661	1	0.190027	0.164567	N	N	0.12558	0.137478	0.18006	0.251397	6.35483	0.0955667	N	N	0.0969076	0.182539	0.136897	0.199462	2.25043	0.522084	0.228	0.075	0	0.33	seq.14093.10	OID20661	0.286085	0.109669
Q99075	HB-EGF	Heparin-binding EGF-like growth factor	seq.14094.29	OID21465	1	0.805616	0.812858	Y	Y	0.779745	0.718811	0.869503	0.80338	24.6699	1.80996e-05	Y	N	0.874965	0.809285	0.78015	0.747954	22.6593	4.75553e-05	0.841	0.895	0.08	0.86	seq.14094.29	OID21465	0.816424	0.829039
P26718	NKG2D	NKG2-D type II integral membrane protein	seq.14095.1	OID31082	2	-0.0479453	0.0603763	N	N	-0.106564	0.00798392	0.0325127	-0.0563287	4.07244	0.253748	N	N	0.0608461	0.0471399	0.0289676	0.170527	3.44452	0.32803	NA	NA	NA	NA	seq.14095.1	OID31082	-0.0185064	0.0665795
P22749	Granulysin	Granulysin	seq.14102.6	OID21132	2	0.766554	0.792115	Y	N	0.815968	0.754019	0.751511	0.744861	10.6038	0.0140732	Y	N	0.77825	0.773996	0.833493	0.770536	9.55466	0.0227569	NA	NA	0.81	0.82	seq.3195.50	OID21132	0.755792	0.766261
Q9NRR2	TPSG1	Tryptase gamma	seq.14103.12	OID30424	1	0.00160233	0.0125277	N	N	0.0654819	-0.0902457	-0.0192582	0.0207549	3.98599	0.26298	N	N	-0.0155685	0.0123848	0.0900912	-0.00687552	2.69123	0.441719	NA	NA	NA	NA	seq.3404.51	OID30424	-0.0245376	-0.0306202
P29622	Kallistatin	Kallistatin	seq.14105.5	OID30774	2	0.585026	0.604233	N	N	0.54404	0.544825	0.53023	0.616899	6.32678	0.0967498	N	N	0.550646	0.632057	0.588906	0.547128	5.53746	0.136415	NA	NA	NA	NA	seq.3449.58	OID30774	0.450881	0.530365
P01137	TGF-b1	Transforming growth factor beta-1	seq.14108.15	OID20621	1	0.474857	0.632331	N	N	0.471338	0.47389	0.382585	0.458082	2.4339	0.487356	N	N	0.57467	0.660499	0.614465	0.570392	6.86765	0.0762381	NA	NA	-0.01	0.06	seq.2333.72	OID20621	0.234568	0.405567
Q16663	MIP-5	C-C motif chemokine 15	seq.14109.15	OID20328	2	0.780474	0.805416	Y	Y	0.820868	0.761191	0.848775	0.704363	42.6064	2.98308e-09	Y	Y	0.864294	0.735675	0.861368	0.77559	53.7401	1.2748e-11	NA	NA	0.9	0.85	seq.18289.16	OID20328	0.64229	0.707433
P09486	ON	SPARC	seq.14110.200	OID21511	2	0.434103	0.509458	Y	Y	0.493335	0.212628	0.566774	0.408279	26.2001	8.66037e-06	Y	N	0.628324	0.479717	0.573521	0.331641	24.3598	2.10112e-05	NA	NA	0.5	NA	seq.3043.49	OID21511	0.705692	0.769845
P35442	TSP2	Thrombospondin-2	seq.14111.15	OID21104	2	0.052289	0.120198	N	N	-0.0112076	0.0643584	0.0951252	0.0867745	3.22792	0.357801	N	N	0.186662	0.134374	0.0380253	0.1966	5.74755	0.12456	0.128	0.137	0.62	0.29, 0.81	seq.14111.15, seq.3339.33	OID21104, OID21104	0.123161753, 0.582637395	0.121173372, 0.601720888
Q969Z4	RELT	Tumor necrosis factor receptor superfamily member 19L	seq.14112.40	OID21142	2	0.134046	0.186143	N	N	0.130462	0.0652966	0.0626703	0.133322	1.76566	0.622437	N	N	0.107472	0.207881	0.173655	0.162786	2.38035	0.497302	0.291	0.325	0.72	NA	seq.14112.40	OID21142	0.179048	0.219137
P35318	Adrenomedullin	Adrenomedullin	seq.14115.34	OID21467	2	-0.00533248	0.159842	N	N	0.0104893	-0.125321	-0.0531678	-0.0608373	3.02373	0.387981	N	N	0.0927361	0.194677	0.215567	0.0564359	6.30087	0.0978555	0.039	0.226	-0.18	-0.21, 0.39	seq.14115.34, seq.7922.5	OID21467, OID21467	-0.244515835, 0.417098607	0.139617429, 0.2953101
P26447	S100A4	Protein S100-A4	seq.14116.129	OID21519	1	0.234767	0.415859	Y	N	0.31695	0.295194	0.106454	0.198647	10.3901	0.015525	N	N	0.329326	0.391719	0.466692	0.443956	5.36603	0.146875	0.338	0.384	0.31	NA	seq.14116.129	OID21519	0.253456	0.339204
Q68DV7	RNF43	E3 ubiquitin-protein ligase RNF43	seq.14120.2	OID31291	1	-0.0240408	0.0039463	N	N	0.0278519	0.0127986	-0.0381527	-0.0172015	0.981458	0.805739	N	N	-0.0227338	0.0146187	0.0640231	0.0447677	1.48075	0.686719	NA	NA	NA	NA	seq.14120.2	OID31291	0.00966566	0.0140621
Q9H7M9	GI24:ECD	V-type immunoglobulin domain-containing suppressor of T-cell activation:Extracellular domain	seq.14123.34	OID20131	2	0.525498	0.633095	N	N	0.564784	0.477226	0.582954	0.488066	6.46158	0.0911901	N	N	0.645591	0.622019	0.660237	0.572174	3.39018	0.335288	NA	NA	0.36	NA	seq.11531.24, seq.14123.34	OID20131, OID20131	0.242114994, 0.238590219	0.316288264, 0.369183745
O95445	ApoM	Apolipoprotein M	seq.14125.5	OID20374	2	0.466483	0.473513	N	N	0.48816	0.555257	0.444482	0.413093	7.48749	0.0578809	N	N	0.470722	0.429732	0.512746	0.525243	4.98719	0.172737	NA	NA	0.51	0.68	seq.10445.20	OID20374	0.508423	0.460727
P52799	EFNB2:ECD	Ephrin-B2:Extracellular domain	seq.14131.37	OID30954	1	0.292207	0.325858	N	N	0.326642	0.184301	0.34896	0.240283	6.5899	0.0861838	N	N	0.343235	0.290005	0.341982	0.253857	2.19837	0.53227	NA	NA	NA	NA	seq.14131.37, seq.8772.5	OID30954, OID30954	0.337588283, -0.089071897	0.382892271, -0.009737766
P27930	IL-1 sRII	Interleukin-1 receptor type 2	seq.14133.93	OID20757	1	0.710167	0.768603	Y	N	0.769664	0.725899	0.673873	0.68524	11.3774	0.00985085	Y	N	0.736201	0.737765	0.835769	0.7518	22.3121	5.61681e-05	0.733	0.791	0.78	0.72	seq.14133.93	OID20757	0.612768	0.666385
Q86SJ2	AMGO2	Amphoterin-induced protein 2	seq.14134.49	OID21370	2	0.421668	0.444262	N	N	0.386936	0.387913	0.498017	0.437334	3.8858	0.274062	N	N	0.4689	0.449804	0.40956	0.445645	1.0915	0.779127	0.3	0.495	0.56	NA	seq.14134.49	OID21370	0.400599	0.481279
Q9NPY3	C1QR1	Complement component C1q receptor	seq.14136.234	OID20397	1	0.710062	0.757539	Y	N	0.728193	0.735998	0.74965	0.671472	8.21545	0.0417627	Y	N	0.773709	0.725832	0.803107	0.734338	11.5177	0.00923181	0.763	0.818	0.73	0.76	seq.14136.234	OID20397	0.587021	0.614926
Q9UHA7	IL-1F6	Interleukin-36 alpha	seq.14150.7	OID30472	1	0.00570101	0.0135203	N	N	0.0133513	0.0548885	0.00508942	0.00595601	0.464268	0.926668	N	N	0.00582185	0.0111673	0.0273648	0.0690209	0.699407	0.873344	NA	NA	NA	NA	seq.14150.7	OID30472	-0.00249704	0.00493236
P08758	Annexin V	Annexin A5	seq.14158.17	OID20810	1	-0.0167878	0.0439591	N	N	-0.0803129	-0.0284242	0.012786	0.0165911	3.04012	0.385481	N	N	-0.00710682	0.0728673	0.0308311	0.0876077	1.85477	0.603089	NA	NA	0.03	NA	seq.14158.17	OID20810	-0.0423871	0.0380825
Q8N4E4	PDCL2	Phosducin-like protein 2	seq.14192.31	OID31168	1	-0.019336	0.0155226	N	N	-0.0419117	-0.0969859	-0.0390056	0.00931134	2.46209	0.482181	N	N	-0.0182809	0.0394309	0.00543345	-0.055179	2.00577	0.57121	NA	NA	NA	NA	seq.14192.31	OID31168	0.210444	0.271725
Q96R05	RET7	Retinoid-binding protein 7	seq.14208.3	OID31526	1	0.457062	0.496217	N	N	0.443972	0.39144	0.475527	0.429908	1.43626	0.697057	N	N	0.466733	0.484865	0.501056	0.474582	0.390691	0.942159	NA	NA	NA	NA	seq.14208.3	OID31526	0.554663	0.534032
Q9H2M3	BHMT2	S-methylmethionine--homocysteine S-methyltransferase BHMT2	seq.14226.120	OID30051	1	-0.0426793	-0.0282301	N	N	-0.115449	-0.0715789	-0.0602487	-0.00239485	4.12072	0.248721	N	N	-0.083191	-0.00383382	-0.0739217	0.0135379	2.7	0.440228	NA	NA	NA	NA	seq.14226.120	OID30051	-0.0243528	-0.0198144
P14649	MYL6B	Myosin light chain 6B	seq.14227.21	OID30936	1	0.0234	0.0191843	N	N	-0.0124965	0.109227	0.0173861	0.029618	2.26884	0.518517	N	N	0.0102217	0.0170602	-0.0155268	0.0888162	1.65743	0.64644	NA	NA	NA	NA	seq.14227.21	OID30936	0.105435	0.108612
P0DMV8	HSP 70	Heat shock 70 kDa protein 1A	seq.14237.1	OID20718	11	-0.0778722	0.0140091	N	N	-0.0972006	-0.108943	-0.0705079	-0.0874344	0.218155	0.974607	N	N	0.099196	0.0264144	-0.0450482	-0.0521628	4.65185	0.199139	NA	NA	0.13	NA	seq.4124.24	OID20718	-0.255297	0.238121
O60496	DOK2	Docking protein 2	seq.14246.50	OID20138	2	0.775667	0.791614	Y	N	0.780348	0.71003	0.813703	0.76851	8.08	0.044387	N	N	0.828598	0.787185	0.793064	0.735884	7.38126	0.0606892	NA	NA	NA	NA	seq.14246.50, seq.19578.19	OID20138, OID20138	0.676080566, 0.597792817	0.726663939, 0.716022391
Q13867	BLMH	Bleomycin hydrolase	seq.14250.115	OID20336	1	-0.0773189	0.0735588	N	N	-0.0470034	-0.0466462	-0.141871	-0.0691066	1.79987	0.614963	N	N	0.0840675	0.0532967	0.114805	0.0594093	1.21859	0.748549	0.038	0.392	NA	-0.08	seq.14250.115	OID20336	-0.129526	0.274268
Q9NRW1	RAB6B	Ras-related protein Rab-6B	seq.14271.23	OID20817	1	0.0589234	0.0601491	N	N	0.0309623	0.207439	0.0402483	0.0551339	5.58587	0.133592	N	N	0.0372117	0.0687353	0.0270379	0.189943	4.50858	0.211526	NA	NA	NA	NA	seq.14271.23	OID20817	0.165641	0.177527
O95644	NF-ATc1	Nuclear factor of activated T-cells, cytoplasmic 1	seq.14286.2	OID20545	1	-0.170254	0.133115	N	N	-0.232299	-0.0810962	-0.101302	-0.113017	5.89356	0.116905	N	N	0.197449	0.19844	0.115467	0.124083	2.88662	0.409439	0.034	0.37	NA	NA	seq.14286.2	OID20545	0.0493062	0.253544
Q9UQE7	CSPG6	Structural maintenance of chromosomes protein 3	seq.14324.52	OID31195	1	-0.00432777	0.00141714	N	N	-0.00678143	0.0420617	-0.0166065	-0.00326732	0.508968	0.916917	N	N	-0.048201	0.00698327	0.00390764	0.0593693	1.45617	0.692421	NA	NA	NA	NA	seq.14324.52	OID31195	-0.00885235	0.00143679
P63172	DYLT1	Dynein light chain Tctex-type 1	seq.14331.262	OID30925	1	-0.09891	0.141001	N	N	-0.139133	-0.0766768	0.0427685	-0.0859438	5.73792	0.125081	N	N	0.230435	0.159904	0.111505	0.094782	3.38962	0.335363	NA	NA	NA	NA	seq.14331.262	OID30925	0.0690166	0.214145
Q0P6D2	FA69C	Protein FAM69C	seq.14341.8	OID30932	1	-0.00042194	-0.00661301	N	N	0.101784	-0.0267737	-0.0450633	-0.0416423	6.80484	0.0783853	N	N	-0.0394353	-0.0204486	0.078067	-0.0969498	5.46933	0.140484	NA	NA	NA	NA	seq.14341.8	OID30932	-0.0307844	-0.0107131
O14793	Myostatin	Growth/differentiation factor 8	seq.14583.49	OID20115	2	0.219742	0.272176	N	N	0.259652	0.289416	0.209713	0.145104	6.82274	0.0777675	Y	N	0.29485	0.183115	0.339031	0.271072	9.51358	0.0231873	0.265	0.274	0.71, 0.66	NA	seq.2765.4, seq.14583.49	OID20115, OID20115	0.612007151, 0.266907896	0.601574147, 0.250945648
Q9H3T2	SEM6C	Semaphorin-6C, cytoplasmic	seq.14597.5	OID30531	2	-0.0428996	0.00230354	N	N	-0.0393963	0.0295432	0.00080115	-0.0800397	3.01557	0.389231	N	N	0.00610778	0.0142854	-0.0325972	0.0498624	1.15318	0.764255	NA	NA	NA	NA	seq.14597.5, seq.7202.107	OID30531, OID30531	-0.055421163, 0.139942057	-0.00445812, 0.086213717
P52758	Ribonuclease UK114	Ribonuclease UK114	seq.14636.25	OID30635	1	0.818053	0.850329	Y	N	0.81497	0.805965	0.877441	0.800551	15.2409	0.00162196	Y	N	0.899002	0.835872	0.853583	0.821637	16.5074	0.000892248	NA	NA	NA	NA	seq.14636.25	OID30635	0.750551	0.82102
P23588	IF4B	Eukaryotic translation initiation factor 4B	seq.14675.20	OID21000	1	0.807827	0.820221	N	N	0.810181	0.765583	0.811305	0.799157	2.46206	0.482188	N	N	0.829185	0.811803	0.823642	0.773572	3.73483	0.291558	0.476	0.625	NA	NA	seq.14675.20	OID21000	0.683677	0.779918
P31751	PKB beta	RAC-beta serine/threonine-protein kinase	seq.14685.17	OID31052	2	0.110976	0.291349	Y	N	0.0899185	0.0122727	0.26761	0.105564	9.70312	0.0212658	Y	N	0.410491	0.289645	0.297526	0.1768	8.39852	0.038455	NA	NA	NA, NA	NA	seq.3392.68, seq.14685.17, seq.5360.9	OID31052, OID31052, OID31052	0.699551722, 0.451140262, 0.756355363	0.771294369, 0.506487294, 0.780435754
O60664	M6PBP	Perilipin-3	seq.14687.6	OID20143	1	-0.0672068	0.167504	N	N	-0.13562	-0.0720382	0.00490442	-0.0512665	3.75215	0.289501	N	N	0.201723	0.203175	0.151939	0.110445	2.19627	0.532683	NA	NA	NA	NA	seq.14687.6	OID20143	0.0971435	0.358903
P58294	EG-VEGF	Prokineticin-1	seq.14703.6	OID20543	1	0.33662	0.266986	N	N	0.311901	0.330582	0.289454	0.345025	0.984422	0.805021	N	N	0.250736	0.267714	0.26351	0.17887	1.66926	0.64379	NA	NA	0	NA	seq.2247.20	OID20543	-0.0481445	-0.0419631
O43915	VEGF-D	Vascular endothelial growth factor D	seq.14705.1	OID20662	2	0.315967	0.252197	Y	Y	0.167289	0.231309	0.368327	0.44725	33.3671	2.69464e-07	Y	N	0.313291	0.354753	0.15203	0.195492	16.5166	0.00088839	0.444	0.413	0.67	0.7, 0.43	seq.13098.93, seq.14705.1	OID20662, OID20662	0.61289832, 0.461131533	0.670264935, 0.438951013
Q15828	Cystatin M	Cystatin-M	seq.14711.27	OID20293	2	0.665119	0.778318	N	N	0.661524	0.683622	0.654511	0.630606	2.02458	0.56732	N	N	0.770818	0.770872	0.77632	0.727539	2.16593	0.538691	0.532	0.808	0.92	NA	seq.14711.27	OID20293	0.569996	0.734128
P20160	Azurocidin	Azurocidin	seq.14713.46	OID20309	2	-0.118537	0.215894	N	N	-0.187753	-0.121765	-0.0411924	-0.115084	3.8417	0.279073	N	N	0.19047	0.232874	0.21476	0.145301	1.67629	0.642217	-0.051	0.304	0.22	0.01	seq.14713.46	OID20309	-0.000733232	0.269961
O75462	CRLF1	Cytokine receptor-like factor 1	seq.14747.9	OID20699	1	0.00794317	0.0289991	N	N	0.0329466	0.0022435	0.105364	0.00100762	2.46918	0.480888	N	N	0.151231	0.0305998	0.0662279	-0.00934063	4.13757	0.246987	NA	NA	-0.06	NA	seq.2607.54, seq.14747.9	OID20699, OID20699	-0.004875566, -0.001387902	0.084410009, 0.074937788
Q13017	RHG05	Rho GTPase-activating protein 5	seq.14748.31	OID31190	1	0.192694	0.19972	Y	N	0.167007	0.027775	0.379729	0.220301	18.3495	0.000372547	Y	N	0.381774	0.222231	0.172992	0.0512038	16.5049	0.000893344	NA	NA	NA	NA	seq.14748.31	OID31190	0.456926	0.500225
P13598	sICAM-2	Intercellular adhesion molecule 2	seq.14756.29	OID20248	1	0.30824	0.411237	N	N	0.225851	0.35229	0.387884	0.356525	7.76682	0.0510849	N	N	0.456691	0.447219	0.376502	0.402582	2.73857	0.433713	NA	NA	0.1	0.15	seq.5486.73	OID20248	0.0835089	0.171549
P12830	Cadherin E	Cadherin-1	seq.14759.149	OID20353	3	0.182354	0.317101	N	N	0.195163	0.152819	0.167713	0.20024	0.5945	0.89769	N	N	0.277223	0.357459	0.279308	0.206021	6.35296	0.0956454	NA	NA	0.13	0.39	seq.18429.10	OID20353	0.165392	0.204289
P33764	S100A3	Protein S100-A3	seq.15297.3	OID31352	1	-0.018625	-0.000109127	N	N	0.00760296	-0.072154	0.0376066	-0.0283177	1.89496	0.594492	N	N	0.00309524	-0.00456498	0.0278104	-0.0217957	0.460424	0.927496	NA	NA	NA	NA	seq.15297.3	OID31352	-0.0288388	0.0356637
Q14696	MESD2	LDLR chaperone MESD	seq.15299.102	OID21099	1	0.818075	0.831593	Y	N	0.848467	0.756571	0.854526	0.793722	18.6209	0.000327454	Y	N	0.861271	0.812318	0.852532	0.781172	12.9476	0.00475139	0.574	0.699	NA	NA	seq.15299.102	OID21099	0.604624	0.633058
Q9H6E4	CC134	Coiled-coil domain-containing protein 134	seq.15300.66	OID31413	1	0.479134	0.493923	Y	N	0.520733	0.449724	0.592776	0.44564	10.1783	0.0171098	N	N	0.579385	0.469107	0.527344	0.464886	6.05623	0.108906	NA	NA	NA	NA	seq.15300.66	OID31413	0.53276	0.5624
P26436	sperm protein 10	Acrosomal protein SP-10	seq.15301.24	OID30513	1	-0.00966099	-0.00942875	N	N	0.0430615	0.00734676	-0.073172	-0.0111315	2.35624	0.501832	N	N	-0.0702085	0.0179514	0.0278209	-0.0328572	2.2382	0.524463	NA	NA	NA	NA	seq.10507.166, seq.15301.24	OID30513, OID30513	-0.014741501, -0.038451878	-0.010363149, -0.039153779
Q06141	PAP1	Regenerating islet-derived protein 3-alpha	seq.15304.1	OID20258	1	0.855831	0.878024	Y	N	0.83843	0.829096	0.890458	0.869853	11.2969	0.010224	Y	N	0.90185	0.891041	0.863284	0.854864	9.73418	0.0209663	0.404	0.393	NA	0.61	seq.15304.1	OID20258	0.857766	0.862158
O76038	Secretagogin	Secretagogin	seq.15305.7	OID20457	1	0.524454	0.542559	N	N	0.508362	0.613704	0.54725	0.499371	5.56429	0.134844	N	N	0.555521	0.532757	0.506888	0.629675	5.36819	0.146739	NA	NA	NA	NA	seq.15305.7	OID20457	0.527369	0.532791
P01591	IgJ	Immunoglobulin J chain	seq.15306.20	OID20494	1	-0.0493855	0.0492139	N	N	-0.062594	-0.0812828	0.0198124	-0.0253876	1.73485	0.629213	N	N	0.0356139	0.0572224	0.0475633	0.0816172	0.295287	0.960912	NA	NA	NA	NA	seq.15306.20	OID20494	0.0191872	0.0527978
Q2TAL6	VWC2	Brorin	seq.15308.108	OID20936	2	0.705356	0.769817	N	N	0.697197	0.659219	0.732758	0.680521	3.17097	0.366009	Y	N	0.749516	0.770598	0.774494	0.675317	8.3308	0.0396476	0.599	0.81	NA	NA	seq.15308.108	OID20936	0.647815	0.768211
O43663	PRC1	Protein regulator of cytokinesis 1	seq.15310.61	OID31345	1	0.0339077	0.033372	N	N	0.123317	-0.0501779	0.0677695	0.000613433	6.50043	0.0896454	N	N	0.0299434	0.0322203	0.0525532	0.00212265	0.387996	0.942711	NA	NA	NA	NA	seq.11591.43, seq.15310.61	OID31345, OID31345	0.035539202, 0.082324983	0.160647515, 0.140493807
Q6PUV4	CPLX2	Complexin-2	seq.15321.8	OID31186	1	0.0255319	0.0110656	N	N	0.0392376	0.0225003	0.0126008	0.00708361	0.320125	0.9562	N	N	-0.027332	-0.00188803	0.011767	0.0564262	0.95511	0.812112	NA	NA	NA	NA	seq.15321.8	OID31186	0.0922331	0.072261
P78560	CRADD	Death domain-containing protein CRADD	seq.15322.35	OID20923	1	0.566936	0.682924	Y	N	0.627396	0.485636	0.57755	0.531546	8.81792	0.0318123	N	N	0.674654	0.677317	0.70573	0.62048	3.50651	0.319918	0.523	0.719	NA	NA	seq.15322.35	OID20923	0.669946	0.733693
P32455	GBP1	Guanylate-binding protein 1	seq.15326.64	OID31128	1	0.645422	0.716824	N	N	0.683091	0.68978	0.662307	0.608075	7.23133	0.064879	N	N	0.738885	0.684644	0.754545	0.732334	7.54611	0.0563855	NA	NA	NA	NA	seq.15326.64	OID31128	0.535008	0.644736
P01579	IFN-g	Interferon gamma	seq.15346.31	OID20495	1	0.028515	0.0508477	N	N	0.0313623	-0.0142911	0.0729781	0.0560094	1.21261	0.749982	N	N	0.0733138	0.0700679	0.0517062	0.0207976	0.526345	0.913067	0.083	0.22	0.06	0	seq.15346.31	OID20495	0.0466947	0.0640805
P02654	Apo C-I	Apolipoprotein C-I	seq.15364.101	OID30749	1	0.31751	0.375032	Y	N	0.436378	0.345859	0.244736	0.220971	19.1066	0.00025987	Y	N	0.345578	0.279948	0.475492	0.410412	16.8127	0.000772288	NA	NA	NA	NA	seq.15364.101	OID30749	0.381908	0.519625
O60242	BAI3	Adhesion G protein-coupled receptor B3	seq.15365.41	OID20974	1	0.0395917	-0.0244986	N	N	0.0109591	-0.0858722	0.132323	0.0800152	7.62734	0.0543753	N	N	-0.0202198	-0.014969	0.0499306	-0.108311	3.8349	0.279853	NA	NA	NA	NA	seq.15365.41	OID20974	0.0544494	-0.0254191
Q8TDL5	LPLC1	BPI fold-containing family B member 1	seq.15367.38	OID20308	2	0.766555	0.762257	N	N	0.766199	0.737912	0.698163	0.744938	3.70577	0.295038	N	N	0.699219	0.741827	0.760308	0.722871	3.20182	0.361543	NA	NA	NA	NA	seq.15367.38	OID20308	0.843808	0.832197
Q8N8U9	BMPER	BMP-binding endothelial regulator protein	seq.15368.3	OID30615	1	0.487807	0.45266	N	N	0.490475	0.457012	0.479484	0.48903	0.355494	0.949275	N	N	0.381476	0.438084	0.485992	0.430794	2.88893	0.409069	NA	NA	NA	NA	seq.15368.3	OID30615	0.306373	0.423009
Q9Y3E2	BOLA1	BolA-like protein 1	seq.15370.5	OID30837	1	0.276733	0.322315	Y	Y	0.367001	0.130777	0.493362	0.216557	31.3926	7.02682e-07	Y	N	0.494758	0.262046	0.408442	0.231895	22.3012	5.64622e-05	NA	NA	NA	NA	seq.15370.5	OID30837	0.523022	0.623661
P25440	BRD2	Bromodomain-containing protein 2	seq.15372.43	OID30826	1	-0.00419386	0.0547159	N	N	-0.042923	0.0151032	0.0452178	-0.0110839	1.43847	0.696542	N	N	0.0601172	0.0571636	0.0167009	0.068935	0.643217	0.886471	NA	NA	NA	NA	seq.10074.128, seq.15372.43	OID30826, OID30826	0.017102002, 0.279165341	0.185466558, 0.292048059
Q9NS71	CA11 protein	Gastrokine-1	seq.15374.15	OID20885	1	0.0268885	0.0264818	N	N	0.0120276	-0.0247578	0.124319	-0.00253152	3.95935	0.265888	N	N	0.134854	0.00255035	0.0254571	-0.0340723	4.616	0.202174	-0.018	0.103	NA	NA	seq.15374.15	OID20885	0.0170388	0.0690011
P15086	Carboxypeptidase B1	Carboxypeptidase B	seq.15375.49	OID20289	1	0.87301	0.877631	Y	Y	0.904304	0.882777	0.807639	0.855679	27.1316	5.52492e-06	Y	Y	0.825072	0.858761	0.914009	0.862021	29.9188	1.43542e-06	0.923	0.93	NA	0.94	seq.15375.49	OID20289	0.84683	0.83467
P14091	CATE	Cathepsin E	seq.15376.134	OID30628	1	0.627425	0.612813	N	N	0.574851	0.615179	0.604366	0.62779	2.0917	0.553594	N	N	0.588301	0.611799	0.578169	0.562351	1.51925	0.677834	NA	NA	NA	NA	seq.15376.134	OID30628	0.606584	0.658649
P12104	FABP2	Fatty acid-binding protein, intestinal	seq.15385.116	OID20200	1	0.58006	0.58027	N	N	0.533564	0.570024	0.565414	0.616114	5.01567	0.170654	N	N	0.557261	0.610814	0.53399	0.56225	4.54525	0.208289	0.647	0.611	NA	0.67	seq.15385.116	OID20200	0.650084	0.56248
P15090	FABPA	Fatty acid-binding protein, adipocyte	seq.15386.7	OID20245	2	0.782066	0.816533	Y	N	0.839884	0.770256	0.710415	0.764157	21.7337	7.41047e-05	Y	Y	0.76078	0.791414	0.877677	0.800253	31.9514	5.35823e-07	0.797	0.893	NA	0.78	seq.15386.7	OID20245	0.737517	0.763728
O60462	Neuropilin-2	Neuropilin-2	seq.15387.44	OID21081	1	0.532106	0.675704	Y	N	0.515418	0.557064	0.607141	0.478473	7.96709	0.0466967	N	N	0.671329	0.639549	0.686658	0.683174	2.72514	0.435972	0.353	0.504	NA	NA	seq.15387.44	OID21081	0.407915	0.50905
Q16595	FRDA	Frataxin, mitochondrial	seq.15389.1	OID21442	2	-0.283905	0.229223	N	N	-0.324114	-0.290258	-0.211816	-0.300625	2.64487	0.449677	N	N	0.25923	0.252522	0.19227	0.183793	2.00812	0.570722	NA	NA	NA	NA	seq.15389.1	OID21442	-0.181847	0.352066
P22466	Galanin	Galanin	seq.15390.3	OID20727	1	0.010609	-0.0307978	N	N	0.0864341	-0.0556763	-0.0379469	0.055607	4.89788	0.179429	N	N	-0.054274	0.0033395	0.0562822	-0.133381	6.13932	0.105025	0.167	0.094	NA	NA	seq.15390.3	OID20727	0.0161023	-0.0787224
Q14393	GAS-6	Growth arrest-specific protein 6	seq.15391.114	OID20318	1	0.633588	0.705678	N	N	0.622691	0.63643	0.57258	0.635846	2.2213	0.527766	N	N	0.62539	0.706905	0.708258	0.685295	5.07238	0.166573	0.573	0.685	NA	0.65	seq.15391.114	OID20318	0.540383	0.550174
P55789	HERV1	FAD-linked sulfhydryl oxidase ALR	seq.15398.2	OID21259	1	0.504921	0.550171	Y	N	0.595536	0.458971	0.562263	0.442709	15.9669	0.00115182	Y	N	0.602893	0.517018	0.621743	0.501369	9.90493	0.0193918	NA	NA	NA	NA	seq.15398.2	OID21259	0.610297	0.658354
P04180	LCAT	Phosphatidylcholine-sterol acyltransferase	seq.15413.3	OID30677	1	0.0790957	0.235746	N	N	0.0989104	0.00908693	0.172974	0.0447879	4.80908	0.186323	N	N	0.313399	0.225999	0.221646	0.116084	5.37555	0.146274	NA	NA	NA	NA	seq.15413.3	OID30677	0.00833862	0.130043
P36952	Maspin	Serpin B5	seq.15417.3	OID20064	1	0.10869	0.0739136	N	N	0.0658481	0.115602	0.108188	0.124353	1.05673	0.787529	N	N	0.0791798	0.0701248	0.0491346	0.111922	0.616766	0.892584	NA	NA	NA	NA	seq.15417.3	OID20064	-0.0894599	-0.0447429
Q9UBM4	OPT	Opticin	seq.15430.165	OID21362	1	-0.122262	-0.062575	N	N	-0.0936766	-0.0706358	-0.0392611	-0.129869	2.09402	0.553123	N	N	-0.0351355	-0.068396	-0.0312063	-0.020511	0.731458	0.865781	-0.098	-0.077	NA	NA	seq.15430.165	OID21362	-0.0398212	-0.0178089
P12931	p60-Src	Proto-oncogene tyrosine-protein kinase Src	seq.15433.4	OID21521	1	0.789394	0.803353	Y	N	0.822273	0.711912	0.802166	0.770695	12.9544	0.00473627	Y	N	0.814484	0.785431	0.835804	0.73116	13.2935	0.00404299	-0.615	-0.64	0.48	0.8, 0.76	seq.15433.4, seq.5488.74	OID21521, OID21521	0.655088555, 0.598010517	0.663218181, 0.691315363
P17900	SAP3	Ganglioside GM2 activator	seq.15441.6	OID30413	1	0.529309	0.566584	Y	N	0.545764	0.455026	0.543568	0.432384	9.13708	0.0275228	Y	N	0.589847	0.494941	0.607825	0.499753	10.1699	0.0171755	NA	NA	NA	NA	seq.15441.6	OID30413	0.549115	0.608464
Q00796	Sorbitol dehydrogenase	Sorbitol dehydrogenase	seq.15447.45	OID21453	1	0.793444	0.801468	Y	N	0.832948	0.719751	0.797649	0.79351	12.7565	0.00519383	Y	N	0.802123	0.807216	0.838267	0.724363	13.3921	0.00386104	NA	NA	NA	NA	seq.15447.45	OID21453	0.73254	0.782531
Q96H15	TIM-4	T-cell immunoglobulin and mucin domain-containing protein 4	seq.15449.33	OID20375	1	0.810652	0.806763	Y	N	0.847	0.7962	0.760864	0.791687	12.5758	0.00564979	Y	N	0.764998	0.784891	0.844851	0.775095	13.071	0.00448561	0.841	0.861	NA	0.85	seq.15449.33	OID20375	0.73207	0.72954
P21589	5'-Nucleotidase	5'-Nucleotidase	seq.15452.5	OID21498	1	0.471211	0.565345	Y	N	0.531819	0.445042	0.35322	0.459111	8.54936	0.0359231	N	N	0.504222	0.573606	0.584858	0.547196	2.6656	0.446104	0.429	0.678	NA	NA	seq.15452.5	OID21498	0.436609	0.593606
P02760	a1-Microglobulin	Alpha-1-microglobulin	seq.15453.3	OID21413	1	0.400638	0.454956	N	N	0.451404	0.350069	0.455965	0.359744	5.78493	0.122556	N	N	0.495973	0.431661	0.509919	0.381316	5.61579	0.131875	0.464	0.562	NA	0.7	seq.15453.3	OID21413	0.498027	0.581853
Q13444	ADA15:ECD	Disintegrin and metalloproteinase domain-containing protein 15:Extracellular domain	seq.15455.40	OID20109	1	0.0632296	0.091663	N	N	-0.00240083	0.0479777	0.0272259	0.120566	5.34613	0.148137	N	N	0.0239957	0.137769	0.0939454	0.0888664	2.96539	0.396993	0.086	0.149	NA	NA	seq.15455.40, seq.9956.7	OID20109, OID20109	0.055877915, -0.020755257	0.033108592, 0.000355082
P15144	Aminopeptidase N	Aminopeptidase N	seq.15457.14	OID20350	1	0.020526	0.0597074	N	N	0.0401275	0.0965841	-0.029702	0.0118438	2.25051	0.522067	N	N	0.00669097	0.0523699	0.10237	0.0202476	1.91021	0.59125	0.051	0.103	NA	0.14	seq.15457.14	OID20350	0.0355803	0.092839
P27487	CD26	Dipeptidyl peptidase 4	seq.15460.9	OID20406	1	0.000592242	0.0411087	N	N	0.0482804	-0.0521311	0.0615794	0.017216	2.00839	0.570667	N	N	0.0613498	0.0169547	0.0999691	-0.0299559	3.30914	0.346373	0.12	0.022	NA	0.09	seq.15460.9	OID20406	0.15767	0.0836822
P01732	CD8A	T-cell surface glycoprotein CD8 alpha chain	seq.15462.28	OID21018	2	0.609336	0.64774	N	N	0.621156	0.592843	0.491955	0.600368	6.59788	0.0858814	N	N	0.550704	0.648109	0.661409	0.605538	6.53063	0.0884624	0.682	0.837	NA	0.78	seq.15462.28	OID21018	0.589435	0.639813
Q8N129	CNPY4	Protein canopy homolog 4	seq.15465.79	OID21317	1	0.691738	0.711109	N	N	0.734073	0.656978	0.687494	0.680856	4.58235	0.205062	N	N	0.698343	0.702459	0.749706	0.672949	4.66745	0.197832	NA	NA	NA	NA	seq.15465.79	OID21317	0.626546	0.645284
P20849	CO9A1	Collagen alpha-1(IX) chain	seq.15466.30	OID20550	1	0.406055	0.361556	N	N	0.388601	0.403637	0.345812	0.424794	1.9877	0.574963	N	N	0.280974	0.385821	0.387101	0.36389	3.2221	0.358633	NA	NA	NA	NA	seq.15466.30, seq.6631.17	OID20550, OID20550	0.575595969, -0.114105481	0.417188518, -0.062359843
Q96CG8	CTHR1	Collagen triple helix repeat-containing protein 1	seq.15467.10	OID30393	2	0.13493	0.214932	N	N	0.064896	0.132194	0.230705	0.128643	4.86214	0.182175	N	N	0.259845	0.211136	0.196851	0.229657	0.834534	0.84119	NA	NA	NA	NA	seq.15467.10	OID30393	0.201514	0.339644
P54317	LIPR2	Pancreatic lipase-related protein 2	seq.15471.29	OID20775	2	0.74855	0.75538	Y	N	0.725249	0.774927	0.633554	0.759528	15.1051	0.00172899	Y	N	0.64897	0.76253	0.738334	0.77739	12.6872	0.00536425	NA	NA	NA	NA	seq.15471.29	OID20775	0.83474	0.826148
Q86VZ4	LRP11	Low-density lipoprotein receptor-related protein 11	seq.15472.16	OID20185	1	0.698058	0.759653	Y	N	0.762661	0.716493	0.725882	0.649005	17.1821	0.000648349	Y	N	0.783904	0.727898	0.814252	0.737951	15.3382	0.0015493	0.7	0.716	NA	NA	seq.15472.16, seq.6713.4	OID20185, OID20185	0.614889784, 0.445510645	0.670389365, 0.464919333
P55058	PLTP	Phospholipid transfer protein	seq.15475.4	OID20238	1	0.300966	0.261148	N	N	0.290656	0.310421	0.242759	0.362643	4.57782	0.205453	N	N	0.209296	0.310679	0.264156	0.271283	2.75616	0.430767	0.208	0.116	NA	0.17	seq.15475.4	OID20238	0.186611	0.164298
Q6UW15	REG3G	Regenerating islet-derived protein 3-gamma	seq.15476.6	OID31408	1	0.601152	0.615989	Y	N	0.625217	0.546089	0.685604	0.567213	10.3497	0.0158159	N	N	0.682082	0.590506	0.634624	0.57421	6.42742	0.0925691	NA	NA	NA	NA	seq.15476.6	OID31408	0.691626	0.708286
O95498	VNN2	Vascular non-inflammatory molecule 2	seq.15480.2	OID21310	1	0.763028	0.781952	N	N	0.775298	0.758725	0.703327	0.759653	4.52293	0.210254	N	N	0.713102	0.77617	0.802877	0.776136	7.70317	0.0525617	NA	NA	NA	NA	seq.15480.2	OID21310	0.755054	0.783349
O00468	Agrin	Agrin	seq.15483.377	OID20786	1	0.479733	0.579015	N	N	0.454806	0.46697	0.45604	0.501809	1.54826	0.671178	N	N	0.526015	0.602926	0.593589	0.519197	4.74612	0.19136	NA	NA	NA	NA	seq.15483.377	OID20786	0.350258	0.479913
P19801	ABP1	Amiloride-sensitive amine oxidase [copper-containing]	seq.15486.126	OID20452	1	0.270395	0.290159	Y	N	0.38524	0.151027	0.169814	0.263309	13.8976	0.00304793	Y	N	0.184961	0.281152	0.400708	0.190673	12.9029	0.00485145	0.368	0.439	NA	NA	seq.15486.126	OID20452	0.201567	0.213473
P23141	carboxylesterase, liver	Liver carboxylesterase 1	seq.15487.164	OID20244	2	0.612238	0.583127	N	N	0.57102	0.636926	0.669814	0.644122	5.5779	0.134053	Y	N	0.676368	0.603224	0.532146	0.621985	9.23153	0.0263658	0.584	0.467	NA	0.5	seq.15487.164	OID20244	0.562265	0.516817
Q9HCU0	CD248	Endosialin	seq.15491.20	OID30394	1	0.756702	0.81291	N	N	0.769185	0.750548	0.795138	0.744171	3.7254	0.292683	N	N	0.815132	0.804096	0.831558	0.798807	2.41526	0.490801	NA	NA	NA	NA	seq.15491.20	OID30394	0.760702	0.780871
Q9NZV1	CRIM1:ECD	Cysteine-rich motor neuron 1 protein:Extracellular domain	seq.15492.1	OID20701	1	0.134286	0.193619	N	N	0.142214	0.127776	0.087876	0.126154	0.52302	0.913806	N	N	0.138016	0.177292	0.265028	0.159828	3.89791	0.272702	0.064	0.03	NA	NA	seq.15492.1, seq.8699.43	OID20701, OID20701	0.143033939, -0.068911601	0.156574057, 0.016321207
Q14512	FGFP1	Fibroblast growth factor-binding protein 1	seq.15494.11	OID21507	1	0.556759	0.552599	N	N	0.591473	0.539523	0.505945	0.545589	2.76248	0.429714	N	N	0.479761	0.523425	0.613008	0.535014	7.56214	0.0559832	0.581	0.667	NA	NA	seq.15494.11	OID21507	0.509337	0.534829
P41439	FOLR3	Folate receptor gamma	seq.15495.9	OID21485	1	0.474181	0.522916	Y	Y	0.605712	0.244496	0.434006	0.41895	34.6978	1.41118e-07	Y	Y	0.461482	0.469184	0.649595	0.328579	34.2074	1.79114e-07	0.324	0.441	NA	NA	seq.15495.9	OID21485	0.449138	0.495697
O00292	Lefty-A	Left-right determination factor 2	seq.15503.15	OID21454	2	0.395343	0.44257	N	N	0.379292	0.381998	0.466475	0.406682	2.14971	0.541922	N	N	0.514989	0.456702	0.417666	0.407888	3.33427	0.342902	NA	NA	NA	NA	seq.15503.15, seq.15503.20	OID21454, OID21454	0.370485533, 0.544033098	0.424775923, 0.637792238
O00292	Lefty-A	Left-right determination factor 2	seq.15503.20	OID21454	1	0.628119	0.671532	Y	N	0.550593	0.636419	0.716746	0.665998	15.7279	0.00128932	Y	N	0.720168	0.723666	0.593332	0.688798	17.1017	0.000673508	NA	NA	NA	NA	seq.15503.15, seq.15503.20	OID21454, OID21454	0.370485533, 0.544033098	0.424775923, 0.637792238
O95502	NPTXR	Neuronal pentraxin receptor	seq.15511.37	OID20191	1	0.706469	0.734159	Y	N	0.669381	0.755186	0.792348	0.667721	20.1781	0.000155911	Y	N	0.800252	0.702125	0.707892	0.751628	12.3445	0.00629165	0.562	0.626	NA	NA	seq.15511.37	OID20191	0.548484	0.59031
Q16651	Prostasin	Prostasin	seq.15513.108	OID20763	1	0.64106	0.624528	Y	N	0.55905	0.503844	0.641164	0.653929	13.6952	0.0033508	Y	N	0.608676	0.640437	0.566335	0.510169	9.00434	0.0292333	0.668	0.638	NA	0.74	seq.15513.108	OID20763	0.557176	0.507907
P06276	Pseudocholinesterase	Cholinesterase	seq.15514.26	OID30717	1	0.763633	0.767118	N	N	0.753797	0.736474	0.74252	0.775931	2.57335	0.46218	N	N	0.76302	0.772703	0.765831	0.7129	3.31739	0.34523	NA	NA	NA	NA	seq.15514.26	OID30717	0.742167	0.734304
P35542	SAA-4	Serum amyloid A-4 protein	seq.15516.12	OID30726	1	0.539421	0.546813	Y	N	0.630771	0.384149	0.454463	0.484765	22.248	5.79216e-05	Y	N	0.467715	0.491464	0.634044	0.403053	20.5206	0.000132384	0.764	0.779	NA	0.76	seq.15516.12	OID30726	0.448325	0.433869
O94985	Alcadein alpha-1	Calsyntenin-1	seq.15521.4	OID20874	1	0.223128	0.215858	N	N	0.301854	0.205938	0.18663	0.207437	3.82094	0.28146	N	N	0.151724	0.205988	0.272883	0.235813	3.00751	0.390469	0.389	0.406	NA	NA	seq.15521.4	OID20874	0.138675	0.169726
P54760	EphB4	Ephrin type-B receptor 4	seq.15530.33	OID20242	1	0.576668	0.71236	N	N	0.585455	0.541185	0.592358	0.534105	2.65026	0.448747	Y	N	0.680734	0.704849	0.739165	0.60443	9.70799	0.0212186	0.419	0.662	-0.1	0.68	seq.15530.33	OID20242	0.50334	0.580926
P21757	Macrophage scavenger receptor:ECD	Macrophage scavenger receptor types I and II:Extracellular domain	seq.15533.97	OID21063	1	0.778866	0.847444	N	N	0.793499	0.774533	0.782114	0.760201	2.2784	0.516671	N	N	0.835989	0.834792	0.862781	0.834351	3.34062	0.342029	0.747	0.923	-0.04	NA	seq.11207.3, seq.15533.97	OID21063, OID21063	-0.063347616, 0.741857787	0.118177679, 0.81688044
Q9BQR3	Marapsin	Serine protease 27	seq.15535.3	OID20212	1	0.689592	0.696505	Y	Y	0.770155	0.553845	0.702272	0.669424	25.9685	9.68349e-06	Y	Y	0.724641	0.662481	0.794096	0.560688	37.819	3.08715e-08	0.583	0.803	0	0.79	seq.15535.3	OID20212	0.605507	0.718669
Q96PX8	SLIK1	SLIT and NTRK-like protein 1	seq.15539.15	OID30510	1	0.569405	0.620901	N	N	0.470828	0.498949	0.587057	0.566613	7.17554	0.0665084	N	N	0.635543	0.601335	0.578593	0.526557	3.78907	0.285159	NA	NA	NA	NA	seq.15539.15	OID30510	0.584921	0.58887
P08670	Vimentin	Vimentin	seq.15540.6	OID20053	1	0.240615	0.297571	N	N	0.251099	0.175791	0.233389	0.263821	1.63414	0.651674	N	N	0.317789	0.314884	0.296264	0.208414	2.55021	0.466285	0.767	0.764	NA	NA	seq.15540.6	OID20053	0.172685	0.195782
P12532	KCRU	Creatine kinase U-type, mitochondrial	seq.15542.19	OID20721	1	0.442613	0.47064	Y	N	0.439936	0.5231	0.292452	0.447303	10.6659	0.0136769	Y	N	0.301922	0.483801	0.446972	0.568853	15.4597	0.00146314	NA	NA	NA	NA	seq.15542.19	OID20721	0.396501	0.396548
Q9P0G3	kallikrein 14	Kallikrein-14	seq.15544.25	OID21407	2	0.771456	0.821359	N	N	0.778344	0.754538	0.74225	0.762217	1.34059	0.719519	N	N	0.783619	0.816214	0.832999	0.809768	3.51587	0.31871	0.712	0.868	-0.03	NA	seq.15544.25	OID21407	0.703162	0.76492
P63098	Calcineurin B a	Calcineurin subunit B type 1	seq.15545.13	OID20902	1	0.483565	0.520269	N	N	0.539208	0.470704	0.476987	0.448296	4.33613	0.227381	N	N	0.508137	0.49919	0.542866	0.500958	1.12994	0.769851	0.672	0.788	0.19, -0.07	NA	seq.4903.72, seq.15545.13	OID20902, OID20902	0.413689023, 0.583575751	0.531629857, 0.638775091
P22303	ACES	Acetylcholinesterase	seq.15553.22	OID30585	2	0.0032999	-0.0240365	N	N	0.0182951	-0.0801953	0.0350664	0.00807669	1.99202	0.574065	N	N	0.0593951	-0.0685823	-0.00682615	-0.023793	3.83711	0.279599	NA	NA	NA	NA	seq.15553.22	OID30585	-0.0593719	0.0820885
P19961	Alpha-amylase 2B	Alpha-amylase 2B	seq.15556.49	OID20340	1	0.810782	0.814196	Y	N	0.850021	0.799234	0.781477	0.805514	9.17254	0.0270827	Y	N	0.812957	0.801035	0.856805	0.785843	11.5077	0.00927484	NA	NA	NA	NA	seq.15556.49	OID20340	0.690366	0.7098
Q07075	AMPE	Glutamyl aminopeptidase	seq.15558.63	OID30135	1	0.0976829	0.108229	N	N	0.0533704	0.160013	0.140247	0.0890655	2.36364	0.500439	N	N	0.135892	0.113733	0.048328	0.186438	3.27614	0.350977	NA	NA	NA	NA	seq.15558.63	OID30135	0.0618846	0.117021
P20062	Apo-TC II	Transcobalamin-2	seq.15560.52	OID20341	2	0.00914715	0.100089	Y	N	-0.0739761	0.167362	0.146425	-0.0148938	14.5008	0.00229701	Y	N	0.213201	0.0873514	0.00598355	0.222155	11.2995	0.0102119	-0.231	-0.24	NA	0.51, -0.2	seq.15560.52, seq.5584.21	OID20341, OID20341	-0.007150003, 0.456476763	0.052463055, 0.506505669
P08236	BGLR	Beta-glucuronidase	seq.15562.24	OID20296	1	0.874669	0.87844	N	N	0.866058	0.860177	0.877454	0.880513	1.97594	0.577416	N	N	0.876399	0.883419	0.8728	0.85634	2.47887	0.479121	0.742	0.754	NA	NA	seq.15562.24	OID20296	0.746192	0.767629
Q8WXI7	CA125	Mucin-16	seq.15565.102	OID21378	1	0.363498	0.338955	N	N	0.36045	0.314896	0.328839	0.35065	0.525211	0.913319	N	N	0.336564	0.331548	0.331053	0.336892	0.0133013	0.999594	0.473	0.538	NA	NA	seq.15565.102	OID21378	0.163498	0.157781
P02458	Collagen II	Collagen Type II	seq.15569.15	OID30286	2	0.0502474	0.221156	N	N	0.0184424	0.0989107	0.153213	0.0350387	4.10601	0.250242	N	N	0.287945	0.224962	0.213846	0.230954	1.19767	0.753564	NA	NA	NA	NA	seq.15569.15, seq.18875.125	OID30286, OID30286	0.159290137, 0.852432985	0.273817782, 0.849123699
P20023	Complement receptor type 2	Complement receptor type 2	seq.15570.99	OID20393	1	0.867732	0.880745	Y	N	0.859586	0.865983	0.915033	0.853183	18.3714	0.000368688	Y	N	0.913362	0.867003	0.884743	0.863381	12.1274	0.00695913	0.873	0.888	NA	0.85	seq.15570.99	OID20393	0.775762	0.77647
O14594	CSPG3	Neurocan core protein	seq.15573.110	OID21055	1	0.705737	0.767777	N	N	0.690893	0.759509	0.655877	0.678508	6.43419	0.0922945	N	N	0.717335	0.744903	0.760316	0.795069	4.59793	0.20372	0.642	0.835	NA	NA	seq.15573.110	OID21055	0.688277	0.736729
P12724	ECP	Eosinophil cationic protein	seq.15576.158	OID20203	2	0.690822	0.775367	Y	Y	0.675506	0.632847	0.788641	0.620323	25.6948	1.10491e-05	Y	N	0.834724	0.748718	0.753661	0.700547	16.233	0.00101584	0.601	0.811	NA	NA	seq.15576.158	OID20203	0.615021	0.777282
Q6UWR7	ENPP6	Ectonucleotide pyrophosphatase/phosphodiesterase family member 6	seq.15579.26	OID30273	1	0.1765	0.0440702	N	N	0.127999	0.323915	0.21332	0.166029	7.13717	0.067652	N	N	0.0635633	0.00560016	0.0635067	0.164403	5.02396	0.170051	NA	NA	NA	NA	seq.15579.26	OID30273	0.35657	0.0598283
O00602	FCN1	Ficolin-1	seq.15582.25	OID30690	3	0.337194	0.41819	N	N	0.225298	0.282421	0.30678	0.34286	5.02024	0.170321	Y	N	0.375519	0.451295	0.280088	0.409685	11.9659	0.00750072	NA	NA	NA	NA	seq.15582.25	OID30690	0.336916	0.506304
Q6BAA4	FCRLB	Fc receptor-like B	seq.15583.18	OID21193	1	0.36339	0.353229	N	N	0.329638	0.394854	0.314985	0.357092	1.33508	0.720821	N	N	0.303243	0.366296	0.322668	0.346783	1.42943	0.69865	0.307	0.304	NA	NA	seq.15583.18	OID21193	0.435327	0.369083
P36980	FHR2	Complement factor H-related protein 2	seq.15584.9	OID30720	1	0.764788	0.762031	Y	N	0.638569	0.705106	0.778819	0.754164	19.8781	0.000179906	Y	N	0.770834	0.749449	0.636553	0.703533	18.0771	0.000424033	NA	NA	NA	NA	seq.15584.9	OID30720	0.815809	0.775784
P14207	FOLR2	Folate receptor beta	seq.15587.20	OID21062	1	0.664197	0.714408	N	N	0.650705	0.730183	0.707992	0.646378	6.74177	0.0806001	N	N	0.745001	0.692635	0.726225	0.721505	3.19086	0.363123	0.374	0.529	NA	NA	seq.15587.20	OID21062	0.578174	0.599014
P06280	galactosidase, alpha	Alpha-galactosidase A	seq.15588.17	OID30594	1	0.334682	0.412126	N	N	0.302943	0.252747	0.295759	0.376375	5.02093	0.170271	N	N	0.401543	0.444461	0.379051	0.314581	5.02629	0.169883	NA	NA	NA	NA	seq.15588.17	OID30594	0.454524	0.474244
P02774	Gc-Globulin, Mixed Type	Vitamin D-binding protein	seq.15589.1	OID30780	1	0.290438	0.277696	N	N	0.311469	0.251137	0.314925	0.268016	1.27664	0.734687	N	N	0.273854	0.259157	0.322976	0.290524	1.48969	0.684652	NA	NA	NA	NA	seq.15589.1	OID30780	0.211375	0.226014
O94992	HEXI1	Protein HEXIM1	seq.15596.7	OID20589	1	0.781401	0.796194	N	N	0.808063	0.730694	0.787177	0.769148	6.2332	0.1008	N	N	0.80149	0.787291	0.82011	0.744232	6.25506	0.0998393	0.696	0.786	NA	NA	seq.15596.7	OID20589	0.611797	0.667085
P08887	IL-6 sRa	Interleukin-6 receptor subunit alpha	seq.15602.43	OID20385	1	0.772275	0.801276	Y	N	0.700954	0.795819	0.774848	0.744055	8.67394	0.0339554	N	N	0.800966	0.783419	0.738192	0.774773	4.95993	0.174755	0.839	0.87	0.71	0.85	seq.15602.43	OID20385	0.620375	0.650122
P17301	Integrin alpha-2	Integrin alpha-2	seq.15603.20	OID30570	1	0.130194	0.161838	N	N	0.063997	0.164254	0.185416	0.136469	3.14245	0.370179	N	N	0.246392	0.146829	0.0931142	0.212609	5.07836	0.166149	NA	NA	NA	NA	seq.15603.20	OID30570	0.0825194	0.105052
P45984	JNK2	Mitogen-activated protein kinase 9	seq.15604.18	OID20557	2	0.416351	0.496411	N	N	0.434071	0.43411	0.453515	0.388737	1.89567	0.59434	N	N	0.488429	0.497408	0.506135	0.491635	0.111183	0.990462	NA	NA	-0.18	NA	seq.15604.18	OID20557	0.523956	0.607266
P08727	Keratin 19	Keratin, type I cytoskeletal 19	seq.15606.19	OID20596	1	0.0445196	0.101276	N	N	-0.0717001	0.0192786	0.0401644	0.0234096	3.27026	0.351803	N	N	0.0531304	0.0868611	0.034696	0.0575428	0.903682	0.824539	-0.108	-0.053	NA	NA	seq.15606.19	OID20596	0.00344215	0.154712
P30613	KPYR	Pyruvate kinase PKLR	seq.15607.56	OID20682	2	0.631758	0.671914	N	N	0.660452	0.650367	0.538179	0.647078	7.39636	0.0602822	Y	N	0.572058	0.702338	0.697511	0.647993	11.6503	0.0086825	NA	NA	NA	NA	seq.15607.56	OID20682	0.422069	0.546201
P28838	LAP	Cytosol aminopeptidase	seq.15610.72	OID20436	2	0.465349	0.489345	Y	N	0.433642	0.386282	0.602809	0.438544	13.9636	0.0029551	Y	N	0.60675	0.471594	0.453692	0.410118	11.281	0.0102994	NA	NA	NA	NA	seq.13959.7, seq.15610.72	OID20436, OID20436	0.541290502, 0.581976224	0.616177991, 0.627674711
P16233	LIPP	Pancreatic triacylglycerol lipase	seq.15613.16	OID30693	1	0.868091	0.876615	Y	N	0.894602	0.877623	0.88034	0.843536	15.1609	0.0016842	Y	N	0.889401	0.851118	0.907397	0.86694	20.5764	0.000128905	NA	NA	NA	NA	seq.15613.16	OID30693	0.868242	0.860909
Q8N149	LIRA2	Leukocyte immunoglobulin-like receptor subfamily A member 2	seq.15614.168	OID21152	1	0.590185	0.641022	Y	N	0.548506	0.636787	0.651192	0.513456	13.1273	0.00436931	Y	N	0.677155	0.583555	0.602465	0.689127	9.36697	0.0247896	NA	NA	NA	NA	seq.15614.168	OID21152	0.411126	0.509864
Q16653	MOG	Myelin-oligodendrocyte glycoprotein	seq.15619.49	OID21384	1	-0.00101333	-0.0330283	N	N	-0.0610769	0.0399153	0.00692425	-0.013158	1.7517	0.625501	N	N	0.0012866	-0.00630498	-0.0362092	0.0428876	0.958398	0.811317	-0.054	-0.025	NA	NA	seq.15619.49	OID21384	-0.0637299	-0.0543973
Q8N2Q7	NLGN1	Neuroligin-1	seq.15620.4	OID30900	3	-0.0261003	-0.015862	N	N	0.0351495	0.0699792	-0.138847	-0.0451241	7.62504	0.0544312	N	N	-0.120618	-0.0117771	0.000368987	0.0640012	4.62867	0.201097	NA	NA	NA	NA	seq.15620.4	OID30900	-0.00917009	-0.00689542
Q15116	PD-1	Programmed cell death protein 1	seq.15623.1	OID21396	2	0.00340143	0.107242	N	N	-0.0162751	-0.0541669	0.000291116	0.0580255	3.29092	0.348909	N	N	0.0497448	0.136135	0.0984092	0.154024	2.09044	0.553849	-0.029	0.176	NA	0.02	seq.15623.1	OID21396	0.00148405	0.12905
P98160	Perlecan	Basement membrane-specific heparan sulfate proteoglycan core protein	seq.15626.223	OID20383	1	0.10296	0.298848	N	N	0.0888102	0.0419764	0.180522	0.0996674	2.67388	0.444684	N	N	0.368388	0.314309	0.317497	0.183114	5.41022	0.144108	0.035	0.278	NA	0.17	seq.15626.223	OID20383	0.121983	0.308513
P11464	PSG1	Pregnancy-specific beta-1-glycoprotein 1	seq.15631.18	OID20916	1	0.150511	0.0857377	N	N	0.0818158	0.215827	0.137873	0.156186	3.14454	0.369872	N	N	0.0424648	0.084119	0.0631019	0.140004	1.37259	0.711971	0.039	-0.036	NA	NA	seq.15631.18	OID20916	0.0587612	0.0479532
Q9H3U7	SMOC2	SPARC-related modular calcium-binding protein 2	seq.15635.4	OID20730	1	0.715807	0.781231	N	N	0.716107	0.714431	0.708629	0.704651	0.189247	0.979306	N	N	0.760227	0.777309	0.779061	0.763	0.605084	0.895268	0.758	0.821	NA	NA	seq.15635.4	OID20730	0.705353	0.752628
P43251	Biotinidase	Biotinidase	seq.15644.1	OID30754	2	0.569689	0.596729	Y	N	0.556255	0.462387	0.467829	0.618882	15.8106	0.00124002	Y	N	0.532688	0.628855	0.591871	0.487832	10.2597	0.0164825	NA	NA	NA	NA	seq.15644.1	OID30754	0.520472	0.539664
P12644	BMP-4	Bone morphogenetic protein 4	seq.15667.39	OID20994	1	0.343736	0.356783	N	N	0.29326	0.384409	0.294795	0.377472	4.07003	0.254001	N	N	0.28113	0.37194	0.322996	0.435542	4.86073	0.182284	0.591	0.526	NA	NA	seq.15667.39, seq.6326.20	OID20994, OID20994	0.424787236, -0.126085313	0.41272316, -0.105986794
Q7Z5L3	C1QL2	Complement C1q-like protein 2	seq.15670.15	OID30515	1	0.143289	0.131627	N	N	0.159773	0.0667078	0.0916422	0.165687	2.73191	0.434831	N	N	0.101618	0.14015	0.133334	0.140642	0.34105	0.952132	NA	NA	NA	NA	seq.15670.15	OID30515	0.214289	0.154281
P17676	CEBPB	CCAAT/enhancer-binding protein beta	seq.15675.3	OID20052	1	0.00228179	0.0787653	N	N	-0.0214019	-0.015218	-0.0011104	0.00385577	0.218693	0.974517	N	N	0.0378106	0.0936379	0.0698727	0.0357474	1.06841	0.784706	NA	NA	0.02	NA	seq.15675.3	OID20052	-0.102345	-0.0129004
P55103	INHBC	Inhibin beta C chain	seq.15686.49	OID21093	1	0.673272	0.696493	N	N	0.683187	0.67162	0.648101	0.697632	1.89944	0.593539	N	N	0.675246	0.726873	0.695899	0.672173	3.79063	0.284978	0.649	0.669	NA	NA	seq.18814.21, seq.15686.49, seq.6408.2	OID21093, OID21093, OID21093	0.275179228, 0.642399986, 0.579814545	0.28659592, 0.671826884, 0.605429123
P06401	PgR	Progesterone receptor	seq.15693.9	OID30460	1	-0.00149623	-0.013251	N	N	-0.0211093	-0.00275892	0.0536707	0.00919452	0.968857	0.808787	N	N	0.0343353	-0.0158183	-0.0209456	0.019036	0.776103	0.855174	NA	NA	NA	NA	seq.15693.9	OID30460	0.00344111	-0.0137639
P40222	TXLNA	Alpha-taxilin	seq.15698.6	OID20952	2	0.00167034	0.329408	N	N	0.0169849	0.0111704	0.159762	-0.0275884	7.55529	0.0561546	N	N	0.429601	0.343618	0.316882	0.2881	4.0676	0.254257	0.659	0.711	NA	NA	seq.15698.6	OID20952	0.544966	0.630936
P35916	VEGF sR3	Vascular endothelial growth factor receptor 3	seq.16035.8	OID21491	2	0.370908	0.520336	N	N	0.288416	0.352155	0.365435	0.336642	1.55582	0.669449	N	N	0.475964	0.487682	0.467185	0.477533	0.222992	0.973795	0.211	0.572	0.49	NA	seq.16035.8	OID21491	0.267802	0.426391
P29353	SHC1:PID	SHC-transforming protein 1:Phosphotyrosine Interaction Domain	seq.16043.30	OID31222	1	0.026687	0.0258545	N	N	-0.00406251	0.0252079	-0.102291	0.0783236	7.50722	0.0573733	Y	N	-0.104315	0.0803685	-0.00265169	0.0323325	7.82247	0.0498267	NA	NA	NA	NA	seq.16043.30, seq.5272.55	OID31222, OID31222	0.031811704, 0.049306717	0.011051248, 0.027658512
P78380	OLR1	Oxidized low-density lipoprotein receptor 1	seq.16049.43	OID20183	3	-0.0081042	0.0575215	N	N	0.0724167	0.0492311	-0.0616214	-0.0498115	5.98854	0.112169	N	N	-0.00700692	0.026398	0.129933	0.0937621	4.66111	0.198362	0.164	0.251	0.63	0.14	seq.16049.43	OID20183	0.410501	0.474636
Q9BXR6	complement factor H-related 5	Complement factor H-related protein 5	seq.16055.3	OID30716	3	0.604389	0.687807	Y	N	0.664369	0.643328	0.659345	0.511008	23.9128	2.60488e-05	Y	Y	0.759305	0.605611	0.749758	0.705475	32.1333	4.90555e-07	0.353	0.488	NA	0.47	seq.16055.3	OID30716	0.291615	0.537403
P11717	IGF-II receptor	Cation-independent mannose-6-phosphate receptor	seq.16057.6	OID21146	1	0.688562	0.714533	N	N	0.669781	0.616724	0.687591	0.685392	2.82561	0.419301	Y	N	0.712728	0.70903	0.725883	0.605502	7.89019	0.0483364	0.689	0.728	0.56	NA	seq.16057.6	OID21146	0.561101	0.551555
Q14112	NID2	Nidogen-2	seq.16060.99	OID21085	1	0.337108	0.39764	N	N	0.32857	0.211986	0.300036	0.377924	6.74494	0.0804875	N	N	0.34237	0.442977	0.354683	0.332323	6.34019	0.0961828	0.611	0.673	0.05	NA	seq.16060.99	OID21085	0.563376	0.61757
Q9Y5W5	WIF-1	Wnt inhibitory factor 1	seq.16070.7	OID21464	1	0.366503	0.3786	Y	N	0.320969	0.278687	0.284216	0.418385	9.12056	0.0277301	Y	N	0.286393	0.438097	0.350267	0.278123	11.0941	0.0112279	0.349	0.465	0.73	NA	seq.16070.7	OID21464	0.389567	0.346929
O75791	GRB2-related adapter protein 2	GRB2-related adapter protein 2	seq.16074.12	OID20192	1	0.177894	0.378281	N	N	0.202418	0.172703	0.26565	0.1978	1.44044	0.696083	N	N	0.420051	0.409028	0.402836	0.388029	0.199759	0.977628	0.151	0.269	-0.18	NA	seq.16074.12, seq.5265.12	OID20192, OID20192	0.200290646, -0.189068628	0.387354405, 0.336156601
O60218	Aldose reductase-like	Aldo-keto reductase family 1 member B10	seq.16081.38	OID30955	1	0.136805	0.134593	Y	N	0.0798133	0.336583	0.154895	0.15006	11.1188	0.0111007	Y	N	0.164508	0.145747	0.0638673	0.333454	12.0898	0.00708188	NA	NA	NA	NA	seq.16081.38	OID30955	0.15642	0.164152
P54764	EPHA4	Ephrin type-A receptor 4	seq.16288.17	OID30622	1	0.644041	0.683315	Y	N	0.600979	0.583714	0.726621	0.650443	11.1259	0.011064	N	N	0.728075	0.682243	0.673403	0.633647	4.07904	0.253055	NA	NA	NA	NA	seq.16288.17	OID30622	0.463167	0.564134
P09681	GIP	Gastric inhibitory polypeptide	seq.16292.288	OID30288	1	0.185608	0.208286	N	N	0.255757	0.101746	0.23182	0.176153	4.62733	0.20121	N	N	0.270642	0.202732	0.278679	0.114203	5.51653	0.137653	NA	NA	NA	NA	seq.16292.288, seq.5755.29	OID30288, OID30288	0.65726753, -0.026747708	0.661403006, 0.024465985
Q8WZ75	ROBO4	Roundabout homolog 4	seq.16297.14	OID30226	2	-0.0544003	-0.0544801	N	N	0.0113838	-0.107355	-0.0147442	-0.0579492	2.67209	0.44499	N	N	-0.0140508	-0.0654827	0.0313942	-0.0985055	3.80835	0.282917	NA	NA	NA	NA	seq.16297.14	OID30226	-0.00181861	0.00872338
Q495A1	TIGIT	T-cell immunoreceptor with Ig and ITIM domains	seq.16299.13	OID31320	2	0.00465656	0.026584	N	N	0.0180459	-0.0880079	-0.00156006	0.000969295	1.84477	0.605241	N	N	-0.00692498	0.0216605	0.0412101	-0.0178468	0.710037	0.870841	NA	NA	NA	NA	seq.16299.13, seq.9638.2	OID31320, OID31320	0.053122657, 0.147508323	0.104799924, 0.200299952
Q9NZC2	TREM2	Triggering receptor expressed on myeloid cells 2	seq.16300.4	OID20731	3	0.781835	0.823056	N	N	0.800259	0.792619	0.754236	0.777223	2.6129	0.455232	N	N	0.794798	0.828956	0.833119	0.804629	3.28098	0.350299	NA	NA	NA	NA	seq.16300.4	OID20731	0.767444	0.817292
Q96DR5	SPLC2	BPI fold-containing family A member 2	seq.16302.11	OID30279	2	0.276133	0.212073	Y	Y	0.471712	0.0987714	0.223198	0.199252	37.0493	4.4921e-08	Y	Y	0.117602	0.135377	0.423248	0.0659518	37.3396	3.89968e-08	NA	NA	NA	NA	seq.16302.11	OID30279	0.438891	0.300914
Q6UXZ4	UNC5H4	Netrin receptor UNC5D	seq.16307.22	OID30447	1	0.456346	0.485004	N	N	0.396333	0.345835	0.47311	0.470011	5.87724	0.117738	N	N	0.544245	0.482617	0.451734	0.382933	5.78228	0.122697	NA	NA	NA	NA	seq.16307.22	OID30447	0.511587	0.527318
Q7Z6A9	BTLA	B- and T-lymphocyte attenuator	seq.16308.14	OID31237	1	0.0161962	0.0577623	N	N	0.0250783	0.0426477	-0.0200769	0.0204234	0.563343	0.90477	N	N	0.00504272	0.068564	0.0541392	0.0896069	1.11198	0.774183	NA	NA	NA	NA	seq.16308.14	OID31237	0.0636568	0.12088
Q9UK85	Soggy-1	Dickkopf-like protein 1	seq.16309.30	OID21313	1	0.0950026	0.0757119	N	N	0.0442612	0.111997	0.0807617	0.0921796	0.934044	0.817205	N	N	0.0644842	0.059511	0.0493163	0.119742	0.83176	0.841856	0.066	-0.001	-0.09	NA	seq.16309.30	OID21313	0.112492	0.0708875
P55285	Cadherin-6	Cadherin-6	seq.16312.45	OID20157	1	-0.0874077	-0.053903	N	N	-0.0782513	-0.0667674	-0.124604	-0.114029	0.819052	0.844905	N	N	-0.126197	-0.0800868	0.0066736	-0.0167635	3.97243	0.264457	0.047	0.074	-0.24	NA	seq.16312.45	OID20157	-0.0393018	0.0405669
P17948	VEGF sR1	Vascular endothelial growth factor receptor 1	seq.16315.105	OID21301	2	0.168122	0.163844	N	N	0.107872	0.119224	0.216344	0.179739	2.9426	0.400561	N	N	0.169887	0.17498	0.123013	0.101587	1.59022	0.661609	NA	NA	NA	NA	seq.16315.105, seq.8231.122	OID21301, OID21301	0.286400039, 0.353981296	0.153040291, 0.356876457
P32926	Desmoglein-3	Desmoglein-3	seq.16317.20	OID21460	1	0.010642	0.0378213	Y	N	0.102484	-0.0630679	-0.106191	-0.00432225	8.64739	0.0343657	Y	N	-0.0756641	0.0225869	0.134215	-0.0503157	9.36272	0.0248375	0.077	0.111	NA	NA	seq.16317.20	OID21460	-0.0728396	-0.0362079
P37023	ALK-1	Serine/threonine-protein kinase receptor R3	seq.16318.12	OID20999	1	0.253995	0.332747	N	N	0.240983	0.232947	0.18025	0.252068	1.21752	0.748804	N	N	0.261821	0.330235	0.40803	0.265888	6.22071	0.101352	0.114	0.37	0.05	NA	seq.16318.12	OID20999	0.331599	0.436457
Q8WU39	PACAP	Marginal zone B- and B1-cell-specific protein	seq.16322.10	OID20732	1	0.760044	0.825254	N	N	0.692645	0.735648	0.756618	0.760487	6.56201	0.0872486	N	N	0.819227	0.825439	0.780573	0.783501	6.24804	0.100147	NA	NA	NA	NA	seq.16322.10	OID20732	0.698448	0.814705
Q9Y4C0	NRX3A	Neurexin-3	seq.16323.8	OID30901	1	0.028051	0.0397608	N	N	0.0509143	-0.0866464	0.00668096	0.0206787	2.96788	0.396604	N	N	0.00132103	0.0343566	0.0811561	-0.0501628	2.85885	0.413904	NA	NA	NA	NA	seq.16323.8	OID30901	0.0475228	0.0327063
Q15399	TLR1:ECD	Toll-like receptor 1:Extracellular domain	seq.16324.38	OID30532	1	0.163306	0.225125	N	N	0.12853	0.210216	0.241623	0.092315	6.48586	0.0902218	N	N	0.179448	0.161634	0.226115	0.256845	2.58358	0.460375	NA	NA	NA	NA	seq.11149.3, seq.16324.38	OID30532, OID30532	-0.066657442, 0.136958346	0.039011579, 0.139294192
P51692	STA5B	Signal transducer and activator of transcription 5B	seq.16551.14	OID21277	1	-0.247168	0.19936	N	N	-0.247491	-0.2459	-0.21586	-0.216727	0.443553	0.931106	N	N	0.211347	0.247575	0.236023	0.157189	1.75118	0.625616	NA	NA	NA	NA	seq.16551.14	OID21277	-0.198447	0.204077
Q99972	MYOC	Myocilin	seq.16558.2	OID21121	1	0.457272	0.508104	N	N	0.460203	0.437839	0.519193	0.455853	1.80942	0.612888	N	N	0.554261	0.489449	0.515295	0.515089	1.77299	0.620831	0.572	0.589	NA	NA	seq.16558.2	OID21121	0.514492	0.517675
P04217	Alpha-1B-glycoprotein	Alpha-1B-glycoprotein	seq.16561.9	OID30771	1	0.537131	0.569339	Y	Y	0.449047	0.29114	0.579316	0.608412	38.088	2.70775e-08	Y	Y	0.584371	0.620721	0.503963	0.354548	26.8518	6.32383e-06	NA	NA	NA	NA	seq.16561.9	OID30771	0.494868	0.539334
P50583	AP4A	Bis(5'-nucleosyl)-tetraphosphatase [asymmetrical]	seq.16583.8	OID21308	1	0.603607	0.618017	Y	N	0.593585	0.485098	0.655117	0.584038	8.13702	0.0432632	N	N	0.655916	0.60613	0.611624	0.497717	7.45335	0.0587692	NA	NA	NA	NA	seq.16583.8	OID21308	0.633461	0.688098
Q13158	FADD	FAS-associated death domain protein	seq.16593.3	OID20151	1	0.0219286	0.325847	N	N	-0.00991115	0.0574989	0.0591381	0.0304388	1.09777	0.777611	N	N	0.348896	0.326261	0.342653	0.298235	0.513421	0.915933	0.536	0.566	NA	NA	seq.16593.3	OID20151	0.295694	0.512921
Q86SX6	GLRX5	Glutaredoxin-related protein 5, mitochondrial	seq.16597.11	OID30663	1	-0.187041	0.146522	N	N	-0.189294	-0.08634	-0.14356	-0.224339	4.37391	0.223817	N	N	0.187593	0.131742	0.127876	0.198764	1.51966	0.677739	NA	NA	NA	NA	seq.16597.11	OID30663	0.0142348	0.289102
P0C862	C1T9A	Complement C1q and tumor necrosis factor-related protein 9A	seq.16605.2	OID30620	1	0.152798	0.103045	Y	N	0.18775	-0.0293427	0.0431706	0.215798	15.5671	0.0013909	Y	N	0.02112	0.126298	0.186165	-0.0523966	11.0593	0.0114093	NA	NA	NA	NA	seq.16605.2	OID30620	0.226068	0.0222131
P15121	Aldose reductase	Aldose reductase	seq.16606.85	OID21244	2	0.474645	0.541439	N	N	0.516941	0.392777	0.47524	0.446149	4.36818	0.224355	N	N	0.535216	0.528358	0.575202	0.451279	4.31547	0.229353	NA	NA	NA	NA	seq.16606.85	OID21244	0.587633	0.688131
P06396	Gelsolin	Gelsolin	seq.16607.78	OID30714	2	0.342008	0.335446	N	N	0.312373	0.381564	0.382497	0.324345	1.86531	0.600827	N	N	0.355822	0.325876	0.284402	0.368422	1.76068	0.623528	NA	NA	NA	NA	seq.16607.78, seq.4775.34	OID30714, OID30714	0.282085765, 0.301680153	0.347418751, 0.303685179
Q6UWL6	KIRR2	Kin of IRRE-like protein 2	seq.16609.106	OID20873	1	0.486832	0.50617	N	N	0.503787	0.414752	0.429224	0.439917	2.87315	0.411599	N	N	0.472206	0.480062	0.523057	0.385231	4.57279	0.205889	0.406	0.588	NA	NA	seq.16609.106	OID20873	0.545335	0.531423
Q12864	CAD17	Cadherin-17	seq.16613.3	OID20134	1	0.821698	0.842185	Y	N	0.810226	0.841504	0.845417	0.788207	9.14097	0.0274741	N	N	0.854414	0.812116	0.840613	0.853085	6.71928	0.0814044	0.934	0.944	NA	NA	seq.16613.3	OID20134	0.843905	0.840633
Q2MKA7	RSPO1	R-spondin-1	seq.16614.27	OID20938	1	0.544425	0.604991	Y	N	0.463152	0.431506	0.472286	0.558902	9.03924	0.0287737	Y	N	0.553576	0.632922	0.543558	0.507049	10.447	0.0151249	0.492	0.71	NA	NA	seq.16614.27, seq.6240.70	OID20938, OID20938	0.490985174, 0.07184239	0.642842804, 0.242071538
P13929	ENOB	Beta-enolase	seq.16616.137	OID30209	1	0.63526	0.639978	N	N	0.649227	0.60802	0.56341	0.616358	3.16212	0.367299	N	N	0.585847	0.613191	0.643701	0.623392	1.56589	0.667149	NA	NA	NA	NA	seq.16616.137	OID30209	0.592182	0.650082
Q07108	CD69	Early activation antigen CD69	seq.16618.7	OID20206	1	0.524383	0.590229	N	N	0.589983	0.494236	0.543561	0.482291	7.41754	0.0597154	N	N	0.619068	0.566237	0.629847	0.555713	4.10818	0.250017	0.335	0.457	NA	NA	seq.16618.7	OID20206	0.13073	0.227936
O60449	LY75	Lymphocyte antigen 75	seq.16620.26	OID20580	1	0.693457	0.7238	Y	N	0.611232	0.65948	0.676689	0.703497	8.11898	0.0436157	N	N	0.698487	0.730033	0.682133	0.674352	4.08683	0.252239	0.519	0.707	NA	NA	seq.16620.26	OID20580	0.627958	0.671583
P09529	Activin B	Activin B	seq.16746.12	OID30625	2	0.0693658	0.0932153	N	N	0.0977461	0.0706586	0.101291	0.0502519	0.977458	0.806706	N	N	0.0456364	0.114323	0.111291	0.128813	1.21084	0.750405	NA	NA	NA	NA	seq.8467.9, seq.13676.46, seq.16746.12	OID30625, OID30625, OID30625	0.26669151, 0.71318975, -0.052296052	0.256889898, 0.783157764, 0.022344669
P16860	BNP	Natriuretic peptides B	seq.16751.15	OID20049	2	0.327819	0.285956	N	N	0.301632	0.324937	0.343267	0.336852	0.549959	0.907786	N	N	0.249263	0.298863	0.316675	0.278777	1.00085	0.801047	0.378	0.244	0.8, 0.45	0.7	seq.16751.15, seq.16751.15, seq.3723.1, seq.3723.1, seq.7655.11, seq.7655.11	OID20049, OID20125, OID20049, OID20125, OID20049, OID20125	0.461934691, 0.537140519, 0.060164784, 0.042479767, 0.646337567, 0.898581136	0.309094384, 0.382218304, -0.013406311, 0.026540489, 0.632490698, 0.892782699
P51858	HDGF	Hepatoma-derived growth factor	seq.16758.96	OID21455	1	0.482165	0.531837	Y	Y	0.645323	0.310432	0.479407	0.446203	36.8336	4.98988e-08	Y	Y	0.539279	0.510591	0.686604	0.423119	30.9289	8.79839e-07	0.609	0.664	NA	NA	seq.16758.96, seq.8953.47	OID21455, OID21455	0.412517198, 0.388014587	0.45157662, 0.451131538
O14960	LECT2	Leukocyte cell-derived chemotaxin-2	seq.16763.11	OID30320	1	0.532968	0.535894	N	N	0.574232	0.472472	0.561426	0.533305	3.30118	0.347478	N	N	0.52356	0.543435	0.583543	0.490626	2.90406	0.406655	NA	NA	NA	NA	seq.16763.11	OID30320	0.428678	0.474113
P02775	PBP	Platelet basic protein	seq.16765.52	OID30761	4	0.836788	0.847855	Y	N	0.867033	0.808174	0.831102	0.822486	8.98175	0.0295345	Y	N	0.841111	0.834338	0.87533	0.827204	8.04391	0.0451129	NA	NA	NA, NA	NA	seq.16765.52, seq.17165.1, seq.2790.54, seq.4544.4	OID30761, OID30761, OID30761, OID30761	0.755199495, 0.80013247, 0.812029725, 0.804074289	0.813110824, 0.816176906, 0.826946285, 0.824210866
P60763	RAC3	Ras-related C3 botulinum toxin substrate 3	seq.16769.20	OID30958	1	0.0607846	0.0691454	N	N	0.00831763	0.17508	0.122254	0.0357052	5.9142	0.11586	N	N	0.117741	0.0418894	0.0343379	0.193828	5.56901	0.134569	NA	NA	NA	NA	seq.16769.20	OID30958	0.123275	0.116212
P48304	REG1B	Lithostathine-1-beta	seq.16770.3	OID20266	1	0.809927	0.841475	Y	N	0.780824	0.78494	0.873899	0.80388	17.6541	0.000518339	Y	N	0.887556	0.839967	0.805471	0.825294	15.3138	0.00156718	NA	NA	NA	NA	seq.16770.3	OID20266	0.76719	0.794385
P0DMV8	HSP 70	Heat shock 70 kDa protein 1A	seq.16780.6	OID20718	10	-0.0706711	0.263954	Y	N	-0.14905	0.0761274	-0.0541232	-0.0452452	7.96404	0.0467607	Y	N	0.244074	0.333783	0.193303	0.325439	7.82169	0.0498442	NA	NA	0.13	NA	seq.4124.24	OID20718	-0.255297	0.238121
O15389	Siglec-5	Sialic acid-binding Ig-like lectin 5	seq.16792.4	OID21082	1	0.798623	0.827639	Y	Y	0.754992	0.74722	0.869607	0.75583	28.4688	2.89548e-06	Y	Y	0.889581	0.795621	0.778974	0.777295	29.8073	1.51509e-06	NA	NA	NA	NA	seq.16792.4	OID21082	0.73084	0.759321
P22676	CALB2	Calretinin	seq.16803.4	OID20801	1	0.258408	0.273337	Y	N	0.356343	0.187133	0.0922231	0.251022	14.2355	0.00260152	Y	N	0.100604	0.27997	0.353669	0.191193	13.7743	0.00322911	NA	NA	NA	NA	seq.16803.4	OID20801	0.298018	0.343486
O76074	PDE5A	cGMP-specific 3',5'-cyclic phosphodiesterase	seq.16805.5	OID30584	2	0.784208	0.808455	N	N	0.803023	0.760317	0.781268	0.769763	2.78335	0.426248	N	N	0.79616	0.800637	0.823127	0.79464	1.75584	0.624591	NA	NA	NA	NA	seq.16805.5, seq.5256.86	OID30584, OID30584	0.619649803, 0.675604754	0.717399666, 0.731510567
Q9H5V8	CDCP1	CUB domain-containing protein 1	seq.16818.200	OID20940	1	0.786351	0.818049	N	N	0.794226	0.794374	0.790189	0.75858	3.55672	0.31348	N	N	0.804764	0.793016	0.835621	0.82245	5.22969	0.15573	0.698	0.862	NA	0.81, 0.14	seq.16818.200, seq.8589.13	OID20940, OID20940	0.807256291, 0.083969742	0.863381623, 0.193479476
P54252	ATX3	Ataxin-3	seq.16825.20	OID31149	1	0.740227	0.77721	Y	N	0.785455	0.727593	0.787574	0.702277	14.7334	0.00205925	Y	N	0.819836	0.752229	0.806596	0.757792	10.4365	0.0151979	NA	NA	NA	NA	seq.16825.20	OID31149	0.770994	0.813607
Q99704	DOK1	Docking protein 1	seq.16831.7	OID31111	1	0.76593	0.758271	Y	N	0.769064	0.697129	0.816901	0.758489	10.4576	0.0150511	Y	N	0.817999	0.750825	0.76129	0.700606	10.6778	0.013602	NA	NA	NA	NA	seq.16831.7	OID31111	0.727623	0.75703
Q5T2W1	NHRF3	Na(+)/H(+) exchange regulatory cofactor NHE-RF3	seq.16852.10	OID30550	1	-0.0248598	0.0705811	N	N	-0.0310363	-0.0382327	0.0113716	0.000516997	0.603778	0.895567	N	N	0.0735611	0.100136	0.0407399	0.0414492	1.37472	0.71147	NA	NA	NA	NA	seq.16852.10	OID30550	0.0531894	0.112929
Q9UPY8	MARE3	Microtubule-associated protein RP/EB family member 3	seq.16885.49	OID31177	2	-0.00831672	-0.0112852	N	N	-0.0679724	0.0577401	0.0321599	-0.0109704	3.00667	0.390598	N	N	-0.024192	-0.0041342	-0.0733375	0.126495	6.11972	0.105929	NA	NA	NA	NA	seq.16885.49	OID31177	-0.00537465	-0.0480932
Q13822	ENPP2	Ectonucleotide pyrophosphatase/phosphodiesterase family member 2	seq.16892.23	OID20288	1	0.598759	0.619561	N	N	0.628821	0.694923	0.606339	0.582432	7.14057	0.0675496	N	N	0.635396	0.603229	0.648713	0.693685	5.14777	0.161291	0.726	0.742	NA	NA	seq.16892.23	OID20288	0.480197	0.493584
Q8NFP4	MDGA1	MAM domain-containing glycosylphosphatidylinositol anchor protein 1	seq.16900.29	OID20951	1	0.838623	0.848469	N	N	0.805341	0.852222	0.853665	0.836293	5.57844	0.134022	N	N	0.859723	0.850244	0.820388	0.844729	3.93372	0.268711	0.926	0.939	NA	NA	seq.16900.29	OID20951	0.844009	0.858844
P11279	LAMP1	Lysosome-associated membrane glycoprotein 1	seq.16902.17	OID30416	1	0.0264349	0.0689384	N	N	0.0261049	0.0614969	0.0196749	0.0172772	0.369087	0.946552	N	N	0.102148	0.0631996	0.0578399	0.0611328	0.401566	0.939919	NA	NA	NA	NA	seq.16902.17	OID30416	-0.0367259	0.098144
P23515	OMGP	Oligodendrocyte-myelin glycoprotein	seq.16908.5	OID21352	1	0.798842	0.816672	N	N	0.829209	0.77105	0.788668	0.792689	5.21572	0.156665	Y	N	0.811316	0.809286	0.854822	0.77628	10.3346	0.0159258	0.853	0.94	NA	NA	seq.16908.5	OID21352	0.881474	0.895658
O00584	RNT2	Ribonuclease T2	seq.16913.8	OID20321	1	0.438896	0.574653	N	N	0.399294	0.449079	0.459501	0.363328	3.97972	0.263663	N	N	0.546283	0.54131	0.537093	0.571819	0.427425	0.934521	NA	NA	NA	NA	seq.16913.8	OID20321	0.3013	0.486904
P08571	sCD14	Monocyte differentiation antigen CD14, soluble	seq.16914.104	OID20378	2	0.436022	0.62051	Y	N	0.476025	0.499046	0.333719	0.326488	15.2187	0.00163897	N	N	0.501033	0.596146	0.634182	0.5646	7.00587	0.0717108	NA	NA	NA	NA	seq.16914.104, seq.8969.49	OID20378, OID20378	0.289444485, 0.395090934	0.457071467, 0.400836125
Q9H5Y7	SLIK6	SLIT and NTRK-like protein 6	seq.16916.19	OID20094	1	0.465173	0.481182	N	N	0.454466	0.420617	0.562915	0.445751	6.19146	0.102658	N	N	0.564576	0.465672	0.496835	0.389742	7.08657	0.0691892	0.209	0.275	NA	NA	seq.16916.19	OID20094	0.538247	0.534416
O15455	TLR3	Toll-like receptor 3	seq.16918.198	OID20612	1	0.579526	0.598264	Y	Y	0.382778	0.553958	0.628382	0.60259	29.8503	1.48383e-06	Y	N	0.637407	0.602439	0.413172	0.582044	24.2696	2.19433e-05	0.562	0.581	NA	NA	seq.16918.198	OID20612	0.606843	0.538759
P07108	ACBP	Acyl-CoA-binding protein	seq.16919.1	OID21143	1	0.785386	0.800888	Y	N	0.796203	0.682683	0.827436	0.78347	15.8782	0.00120109	Y	N	0.845662	0.795501	0.806056	0.716279	14.7422	0.00205071	NA	NA	NA	NA	seq.16919.1	OID21143	0.771767	0.789025
Q9ULL4	PLXB3	Plexin-B3	seq.16922.53	OID20160	1	-0.093321	0.240915	N	N	-0.0202962	-0.116726	-0.147577	-0.100485	3.33804	0.342384	N	N	0.218003	0.254513	0.293818	0.116202	5.56509	0.134797	0.276	0.571	NA	NA	seq.16922.53	OID20160	0.0253664	0.324332
P08263	GST A1-1	Glutathione S-transferase A1	seq.17138.8	OID20166	2	0.807683	0.791112	N	N	0.785157	0.81533	0.819902	0.813169	2.36437	0.500302	N	N	0.815111	0.792437	0.753893	0.810055	5.6094	0.132239	NA	NA	NA	NA	seq.17138.8	OID20166	0.807863	0.687732
P30043	BLVRB	Flavin reductase (NADPH)	seq.17148.7	OID21141	1	0.72794	0.76955	Y	N	0.775493	0.748379	0.675346	0.711907	9.69011	0.0213925	Y	N	0.710591	0.761067	0.80634	0.781259	9.38546	0.0245817	0.834	0.848	NA	NA	seq.17148.7	OID21141	0.629307	0.702083
P43632	KI2S4	Killer cell immunoglobulin-like receptor 2DS4	seq.17152.10	OID31432	1	-0.0347359	-0.00281589	N	N	0.0181585	0.0132404	0.0854856	-0.0287618	2.94072	0.400856	N	N	0.0620468	-0.0220298	0.0902326	-0.00846253	4.48364	0.213754	NA	NA	NA	NA	seq.17152.10	OID31432	0.0051661	-0.00258767
P43628	KI2L3	Killer cell immunoglobulin-like receptor 2DL3	seq.17153.46	OID21196	1	0.646776	0.655561	Y	N	0.511688	0.668444	0.673433	0.624738	14.9221	0.00188446	Y	N	0.684245	0.640632	0.525414	0.662165	14.2389	0.00259739	0.71	0.756	NA	NA	seq.17153.46	OID21196	0.80472	0.831071
Q9UK41	VPS28 protein homolog	Vacuolar protein sorting-associated protein 28 homolog	seq.17155.1	OID31273	1	-0.0421465	0.0828611	N	N	-0.0484596	-0.065104	0.0931361	-0.0225253	4.33069	0.227899	N	N	0.218809	0.100295	0.0877966	0.0598625	4.32559	0.228385	NA	NA	NA	NA	seq.17155.1	OID31273	0.0173368	0.21807
P12429	Annexin III	Annexin A3	seq.17163.117	OID21036	1	-0.260725	0.146532	N	N	-0.267655	-0.193485	-0.216671	-0.299022	3.29357	0.348538	N	N	0.119541	0.177621	0.118876	0.134006	1.51661	0.678442	NA	NA	NA	NA	seq.17163.117	OID21036	-0.199248	0.286151
P09525	annexin IV	Annexin A4	seq.17164.15	OID20123	1	0.734294	0.74028	Y	N	0.754816	0.560593	0.771582	0.730362	23.5388	3.11773e-05	Y	N	0.783562	0.738854	0.751945	0.583517	21.134	9.8741e-05	0.614	0.739	NA	NA	seq.17164.15	OID20123	0.734855	0.753308
P02775	BTG	Beta-thromboglobulin	seq.17165.1	OID30761	3	0.86646	0.868775	N	N	0.885237	0.85306	0.866361	0.853307	5.53014	0.136847	N	N	0.864819	0.857806	0.887278	0.850837	5.40741	0.144283	NA	NA	NA, NA	NA	seq.16765.52, seq.17165.1, seq.2790.54, seq.4544.4	OID30761, OID30761, OID30761, OID30761	0.755199495, 0.80013247, 0.812029725, 0.804074289	0.813110824, 0.816176906, 0.826946285, 0.824210866
P10092	CALCB	Calcitonin gene-related peptide 2	seq.17170.15	OID31100	1	0.376584	0.414362	N	N	0.275694	0.372	0.430411	0.372784	6.00022	0.1116	N	N	0.413348	0.43103	0.348255	0.410206	2.8637	0.413121	NA	NA	NA	NA	seq.17170.15	OID31100	0.482666	0.358926
P52564	MP2K6	Dual specificity mitogen-activated protein kinase kinase 6	seq.17175.5	OID20552	1	0.277927	0.480264	Y	N	0.292887	0.107558	0.337798	0.313969	9.70403	0.021257	N	N	0.491559	0.514114	0.499446	0.359308	6.87714	0.0759185	0.68	0.748	NA	NA	seq.17175.5	OID20552	0.721075	0.709152
O75475	PSIP1	PC4 and SFRS1-interacting protein	seq.17176.13	OID20534	1	0.607592	0.624167	N	N	0.633709	0.530761	0.627054	0.59829	4.13236	0.247522	N	N	0.626689	0.623286	0.658085	0.519092	6.99102	0.0721844	0.6	0.707	NA	NA	seq.17176.13	OID20534	0.64552	0.708114
Q16740	ClpP endopeptidase	ATP-dependent Clp protease proteolytic subunit, mitochondrial	seq.17196.5	OID20910	1	0.224001	0.422822	Y	N	0.289185	0.0666292	0.351311	0.181476	15.1357	0.00170426	Y	N	0.497687	0.426736	0.431279	0.277662	8.82302	0.0317389	NA	NA	NA	NA	seq.17196.5	OID20910	0.331312	0.364761
P56279	TCL1A	T-cell leukemia/lymphoma protein 1A	seq.17210.2	OID20987	1	0.636943	0.695895	Y	N	0.681998	0.712433	0.607286	0.58793	13.3831	0.00387734	Y	N	0.651575	0.659505	0.732628	0.724591	8.45272	0.0375258	0.818	0.829	NA	NA	seq.17210.2	OID20987	0.745221	0.729027
P20774	MIME	Mimecan	seq.17224.12	OID21123	1	0.399548	0.449752	N	N	0.374891	0.337087	0.381649	0.377585	0.44157	0.931527	N	N	0.409698	0.440904	0.427078	0.415323	0.414295	0.937274	NA	NA	NA	NA	seq.17224.12	OID21123	0.415017	0.442243
P13796	L-plastin	Plastin-2	seq.17231.1	OID30367	2	0.369642	0.401286	N	N	0.345956	0.406687	0.359395	0.312629	2.40097	0.493455	N	N	0.359126	0.362184	0.372765	0.436875	1.54882	0.67105	NA	NA	NA	NA	seq.17231.1	OID30367	0.361222	0.417169
Q16774	KGUA	Guanylate kinase	seq.17325.10	OID30148	1	0.0260701	0.0252161	N	N	0.0514409	-0.00287229	0.0696009	-0.00284975	1.7171	0.63314	N	N	0.0519739	0.00618299	0.0541485	0.0119038	0.942245	0.815223	NA	NA	NA	NA	seq.17325.10	OID30148	-0.0159932	0.0323703
P11310	ACADM	Medium-chain specific acyl-CoA dehydrogenase, mitochondrial	seq.17333.20	OID31277	1	0.146363	0.150988	N	N	0.18258	0.128386	0.268349	0.120064	5.55983	0.135104	N	N	0.283368	0.120813	0.186227	0.129876	6.65342	0.0838045	NA	NA	NA	NA	seq.17333.20	OID31277	0.16272	0.195938
P25490	TYY1	Transcriptional repressor protein YY1	seq.17337.1	OID30446	1	0.0135343	0.0820873	N	N	-0.0271094	0.0186357	0.0275572	0.0281764	0.980686	0.805925	N	N	0.0967626	0.0886405	0.0591224	0.104073	0.430605	0.93385	NA	NA	NA	NA	seq.17337.1	OID30446	0.119958	0.265298
Q8TD06	AGR3	Anterior gradient protein 3	seq.17342.13	OID21243	1	0.750738	0.762003	N	N	0.772297	0.73547	0.743639	0.726478	3.31149	0.346047	N	N	0.744865	0.747535	0.777225	0.739855	1.93021	0.587019	0.641	0.687	NA	NA	seq.17342.13	OID21243	0.658418	0.66229
Q96BJ3	CA080	Axin interactor, dorsalization-associated protein	seq.17347.80	OID30956	1	0.0281866	0.0178852	N	N	-0.0696372	0.126291	0.051428	0.0250013	6.41464	0.0930903	Y	N	0.0462594	0.0198921	-0.102324	0.139932	9.89282	0.0194995	NA	NA	NA	NA	seq.17347.80	OID30956	0.171095	0.206928
P08579	RU2B	U2 small nuclear ribonucleoprotein B''	seq.17364.8	OID31132	1	0.578153	0.633638	N	N	0.577953	0.513663	0.657034	0.571585	6.48915	0.0900913	N	N	0.702157	0.639273	0.63247	0.56173	7.02494	0.0711072	NA	NA	NA	NA	seq.17364.8	OID31132	0.506788	0.63854
Q16773	KAT1	Kynurenine--oxoglutarate transaminase 1	seq.17365.7	OID20232	1	-0.141521	0.168449	N	N	-0.213186	-0.0834537	-0.120621	-0.0780207	5.98596	0.112295	N	N	0.217189	0.215146	0.125321	0.199462	2.7889	0.425331	0.121	0.487	NA	NA	seq.17365.7	OID20232	-0.117283	0.245166
Q96GG9	DCNL1	DCN1-like protein 1	seq.17366.6	OID30830	1	-0.0488071	-0.0405055	Y	N	0.0504845	0.102293	-0.0381053	-0.11312	13.278	0.00407246	Y	N	-0.0291257	-0.0972706	0.0421546	0.104866	10.717	0.0133589	NA	NA	NA	NA	seq.17366.6	OID30830	-0.0158969	0.0269359
Q13541	4EBP1	Eukaryotic translation initiation factor 4E-binding protein 1	seq.17372.5	OID20162	1	-0.174494	0.254328	Y	N	-0.120081	-0.0129815	-0.196026	-0.22461	10.0955	0.0177716	N	N	0.254901	0.273261	0.244989	0.279843	0.364678	0.947439	-0.042	0.444	NA	0.01	seq.17372.5	OID20162	-0.087645	0.375115
Q96I25	SPF45	Splicing factor 45	seq.17391.10	OID31034	1	0.65291	0.656089	Y	N	0.692237	0.57686	0.704352	0.620949	10.6601	0.0137134	Y	N	0.713434	0.628249	0.683447	0.596285	8.4721	0.0371989	NA	NA	NA	NA	seq.17391.10	OID31034	0.736092	0.747149
P09601	HO-1	Heme oxygenase 1	seq.17398.55	OID20217	1	0.759769	0.797823	N	N	0.729645	0.774716	0.745613	0.776748	4.16058	0.244638	N	N	0.789642	0.810252	0.7729	0.786197	3.32176	0.344625	0.837	0.85	NA	0.82	seq.17398.55	OID20217	0.728948	0.72443
P45954	acyl-Coenzyme A dehydrogenase	Short/branched chain specific acyl-CoA dehydrogenase, mitochondrial	seq.17403.14	OID30356	1	0.507596	0.537919	Y	N	0.547025	0.345918	0.502902	0.499496	9.82946	0.0200728	Y	N	0.54578	0.532719	0.590002	0.382344	11.477	0.00940747	NA	NA	NA	NA	seq.17403.14	OID30356	0.0244344	0.182613
O15182	CETN3	Centrin-3	seq.17410.5	OID31525	1	0.22066	0.40917	N	N	0.14396	0.243107	0.315164	0.210048	5.765	0.123621	N	N	0.504045	0.402624	0.38811	0.40469	4.19342	0.241322	NA	NA	NA	NA	seq.17410.5	OID31525	0.621874	0.623091
Q92890	UFD1	Ubiquitin recognition factor in ER-associated degradation protein 1	seq.17411.55	OID31486	1	0.808084	0.81725	N	N	0.822105	0.753267	0.804817	0.804196	5.04921	0.168229	N	N	0.816713	0.813048	0.831396	0.765117	5.13967	0.161851	NA	NA	NA	NA	seq.17411.55	OID31486	0.756315	0.780693
P09923	Alkaline phosphatase, intestine	Intestinal-type alkaline phosphatase	seq.17441.4	OID30497	1	0.564464	0.565981	N	N	0.562188	0.593034	0.592032	0.553316	1.13128	0.769529	N	N	0.573208	0.557737	0.573845	0.565586	0.220271	0.974252	NA	NA	NA	NA	seq.17441.4	OID30497	0.43285	0.380238
Q6FHJ7	SFRP4	Secreted frizzled-related protein 4	seq.17447.52	OID30648	1	0.786851	0.818774	N	N	0.787845	0.814008	0.795293	0.771233	2.84208	0.416619	N	N	0.819505	0.800405	0.830742	0.826669	3.01107	0.389922	NA	NA	NA	NA	seq.17447.52	OID30648	0.759667	0.778107
P12081	Histidyl-tRNA synthetase	Histidine--tRNA ligase, cytoplasmic	seq.17450.51	OID21086	1	0.798173	0.814072	Y	N	0.815253	0.748271	0.833202	0.778885	9.67398	0.0215508	N	N	0.843246	0.797549	0.825062	0.774651	7.14183	0.067512	NA	NA	NA	NA	seq.17450.51	OID21086	0.681439	0.762866
P15328	FOLR1	Folate receptor alpha	seq.17455.42	OID21529	1	0.138217	0.141163	N	N	0.158413	0.173931	0.152449	0.122492	0.767398	0.857248	N	N	0.152289	0.150473	0.182432	0.140257	0.414065	0.937322	0.073	0.179	NA	NA	seq.17455.42	OID21529	0.0995623	0.135617
Q96KB5	TOPK	Lymphokine-activated killer T-cell-originated protein kinase	seq.17475.18	OID31158	1	-0.0162643	-0.0210236	N	N	-0.0143967	-0.0104256	0.0279765	-0.0207818	0.511115	0.916443	N	N	-0.0303993	-0.0469193	0.0370452	0.0357951	2.79113	0.424962	NA	NA	NA	NA	seq.17475.18	OID31158	-0.0483152	0.00601366
P37108	SRP14	Signal recognition particle 14 kDa protein	seq.17510.7	OID21324	1	0.131054	0.31192	N	N	0.122392	0.0940885	-0.00142489	0.144479	4.69844	0.195259	Y	N	0.143056	0.358248	0.312849	0.212838	13.576	0.00354295	0.33	0.574	NA	NA	seq.17510.7	OID21324	0.340289	0.491278
Q13287	NMI	N-myc-interactor	seq.17512.2	OID31378	1	0.495063	0.535059	Y	N	0.598146	0.530424	0.503469	0.480049	8.49579	0.036803	N	N	0.540808	0.524428	0.616085	0.544549	5.64402	0.130274	NA	NA	NA	NA	seq.17512.2	OID31378	0.649076	0.695413
P50995	ANX11	Annexin A11	seq.17513.11	OID20583	1	0.793471	0.814779	Y	N	0.805293	0.735633	0.848657	0.77785	14.4175	0.00238863	Y	N	0.864057	0.800487	0.826195	0.767608	13.4881	0.0036917	0.248	0.653	NA	NA	seq.17513.11	OID20583	0.564445	0.694076
P27352	Gastric intrinsic factor	Gastric intrinsic factor	seq.17672.184	OID20179	1	0.831505	0.847008	Y	N	0.774493	0.813482	0.857677	0.850089	18.1501	0.000409577	Y	Y	0.864224	0.873957	0.78819	0.817272	27.2468	5.22605e-06	0.821	0.92	NA	0.91	seq.17672.184	OID20179	0.86995	0.88676
Q9NPJ3	ACO13	Acyl-coenzyme A thioesterase 13	seq.17675.17	OID31522	1	0.802359	0.810885	Y	N	0.816464	0.714199	0.838807	0.797556	14.2628	0.00256846	Y	N	0.84731	0.805413	0.822972	0.729464	13.7716	0.00323305	NA	NA	NA	NA	seq.17675.17	OID31522	0.574882	0.613422
O95971	BY55	CD160 antigen	seq.17677.47	OID20647	1	0.20324	0.209359	N	N	0.17671	0.215316	0.268189	0.188213	1.87946	0.597799	N	N	0.256412	0.200295	0.185995	0.23562	1.19405	0.754432	0.192	0.197	NA	NA	seq.17677.47	OID20647	0.414086	0.354606
Q9Y279	VSIG4	V-set and immunoglobulin domain-containing protein 4	seq.17678.28	OID21144	1	0.78518	0.826559	N	N	0.774033	0.757946	0.815785	0.769024	3.97459	0.264221	N	N	0.848814	0.819225	0.819192	0.780021	5.31018	0.150443	NA	NA	NA	NA	NA	NA	NA	NA
P15529	CD46	Membrane cofactor protein	seq.17682.1	OID20380	1	0.519554	0.672333	N	N	0.520315	0.550913	0.541154	0.483061	2.52719	0.470397	N	N	0.677501	0.655956	0.705341	0.598605	5.70592	0.126828	0.076	0.157	NA	0.66	seq.17682.1	OID20380	0.281465	0.419467
Q9P000	COMD9	COMM domain-containing protein 9	seq.17683.2	OID31390	1	0.292597	0.30007	N	N	0.327315	0.184363	0.262144	0.28971	3.71613	0.293793	N	N	0.262177	0.305826	0.334331	0.175597	4.92695	0.177225	NA	NA	NA	NA	seq.17683.2	OID31390	0.43977	0.501134
P06727	Apo A-IV	Apolipoprotein A-IV	seq.17685.9	OID30733	1	0.726764	0.727228	N	N	0.698889	0.723463	0.742878	0.706896	1.70106	0.636699	N	N	0.73993	0.706933	0.696651	0.719433	1.50654	0.680761	NA	NA	NA	NA	seq.17685.9	OID30733	0.761637	0.7303
Q99426	TBCB	Tubulin-folding cofactor B	seq.17686.27	OID20993	1	0.803792	0.829242	N	N	0.814885	0.765282	0.826531	0.790938	4.88695	0.180265	N	N	0.848461	0.819835	0.836685	0.796157	4.15256	0.245455	0.293	0.76	NA	NA	seq.17686.27	OID20993	0.709658	0.83551
O14773	TPP1	Tripeptidyl-peptidase 1	seq.17691.1	OID20750	1	0.678298	0.751291	N	N	0.679393	0.686377	0.66919	0.665086	0.395927	0.941083	Y	N	0.728502	0.735422	0.790378	0.67951	10.1151	0.0176129	0.713	0.724	NA	NA	seq.17691.1	OID20750	0.622353	0.664355
Q9UL46	PSME2	Proteasome activator complex subunit 2	seq.17694.32	OID20989	1	0.61169	0.661615	N	N	0.674891	0.595403	0.575574	0.586045	7.52071	0.0570286	N	N	0.641045	0.646045	0.706832	0.628509	4.87174	0.181434	NA	NA	NA	NA	seq.17694.32	OID20989	0.720548	0.759681
Q02790	FKBP52 protein	Peptidyl-prolyl cis-trans isomerase FKBP4	seq.17722.5	OID20960	1	0.750147	0.782167	Y	N	0.786985	0.732966	0.779596	0.716669	10.0149	0.0184399	N	N	0.799113	0.764493	0.80735	0.772862	4.53044	0.209591	0.569	0.755	NA	NA	seq.17722.5	OID20960	0.680906	0.763113
O95997	Securin	Securin	seq.17727.1	OID31326	1	-0.00213703	-0.00385565	N	N	-0.011051	-0.0214253	-0.0400749	0.013112	0.721596	0.868113	N	N	-0.0758207	0.0222843	-0.0301734	-0.00372431	2.34252	0.504424	NA	NA	NA	NA	seq.17727.1	OID31326	0.0125674	0.0290048
O43768	a-endosulfine	Alpha-endosulfine	seq.17734.13	OID31355	1	0.439074	0.448938	N	N	0.42295	0.433982	0.507839	0.413722	3.11983	0.373517	N	N	0.516026	0.428	0.42634	0.452237	3.00251	0.391238	NA	NA	NA	NA	seq.17734.13	OID31355	0.524101	0.58487
O95166	GBRAP	Gamma-aminobutyric acid receptor-associated protein	seq.17735.130	OID31414	1	0.107208	0.113561	Y	N	0.104932	0.187447	-0.0833354	0.127519	11.8202	0.0080252	Y	N	-0.0474045	0.131908	0.101924	0.201731	9.3295	0.0252161	NA	NA	NA	NA	seq.17735.130	OID31414	0.117113	0.156913
P26440	IVD	Isovaleryl-CoA dehydrogenase, mitochondrial	seq.17737.7	OID20833	1	0.264295	0.275152	Y	N	0.180059	0.245743	0.378968	0.289569	8.55408	0.0358465	Y	N	0.384783	0.301106	0.183614	0.274035	8.81967	0.0317871	NA	NA	NA	NA	seq.17737.7	OID20833	0.127564	0.141574
Q9UBG3	CRNN	Cornulin	seq.17738.7	OID21427	1	0.430285	0.38599	Y	N	0.384447	0.33153	0.41785	0.486994	9.18035	0.0269867	N	N	0.41684	0.41449	0.378188	0.309601	3.03657	0.386022	0.388	0.24	NA	NA	seq.17738.7	OID21427	0.196853	0.19674
Q16836	HCDH	Hydroxyacyl-coenzyme A dehydrogenase, mitochondrial	seq.17739.1	OID30132	1	0.0213108	0.0273964	N	N	0.00638431	-0.0616337	0.0315847	0.0688178	3.56276	0.312713	N	N	0.0125671	0.0755451	0.0243428	-0.0648872	4.00523	0.2609	NA	NA	NA	NA	seq.17739.1	OID30132	0.0952412	0.0897819
P10301	RRAS	Ras-related protein R-Ras	seq.17742.2	OID30961	1	0.219927	0.340629	N	N	0.281212	0.258426	0.263668	0.18216	4.18766	0.2419	Y	N	0.406152	0.29095	0.41811	0.370176	8.13806	0.043243	NA	NA	NA	NA	seq.17742.2	OID30961	0.0838526	0.37411
Q9Y3D6	FIS1	Mitochondrial fission 1 protein	seq.17746.77	OID20722	1	0.631753	0.645801	Y	N	0.693642	0.588871	0.65746	0.592841	10.4646	0.0150028	N	N	0.697302	0.621977	0.682195	0.598888	7.0948	0.0689366	NA	NA	NA	NA	seq.17746.77	OID20722	0.539032	0.56024
Q53FA7	QORX	Quinone oxidoreductase PIG3	seq.17748.21	OID30632	1	0.811373	0.834072	N	N	0.822723	0.80666	0.814363	0.799942	1.42417	0.699879	N	N	0.833574	0.823962	0.844785	0.816927	1.82085	0.610408	NA	NA	NA	NA	seq.17748.21	OID30632	0.764042	0.786759
P31350	RIR2	Ribonucleoside-diphosphate reductase subunit M2	seq.17750.8	OID21187	1	-0.0781904	0.0275794	N	N	-0.0723196	0.0692949	-0.147719	-0.0848772	6.33491	0.0964057	N	N	-0.0252307	0.019544	0.00613145	0.157447	4.94816	0.175633	NA	NA	NA	NA	seq.17750.8	OID21187	-0.189818	0.136339
P53674	CRBB1	Beta-crystallin B1	seq.17751.68	OID30319	1	0.669276	0.733525	Y	N	0.648881	0.628918	0.782116	0.658133	17.8782	0.000466034	Y	N	0.817226	0.740668	0.70136	0.69542	15.4963	0.0014381	NA	NA	NA	NA	seq.17751.68	OID30319	0.690846	0.748745
P78540	Arginase	Arginase-2, mitochondrial	seq.17752.24	OID31339	1	0.0803949	0.174487	Y	N	0.0693717	0.112492	0.236305	0.0344405	9.31721	0.0253576	Y	N	0.326341	0.136388	0.17466	0.184711	8.62404	0.0347305	NA	NA	NA	NA	seq.17752.24	OID31339	-0.0108917	0.173463
O60701	UGDH	UDP-glucose 6-dehydrogenase	seq.17755.5	OID30081	1	0.043054	0.0398885	N	N	0.0571477	0.0285296	0.0438137	0.0448219	0.126519	0.988475	N	N	0.041123	0.0439876	0.0571516	0.0274165	0.140224	0.986608	NA	NA	NA	NA	seq.17755.5	OID30081	-0.0085513	-0.0135824
P32321	DCTD	Deoxycytidylate deaminase	seq.17756.69	OID30657	1	0.721132	0.760712	N	N	0.717572	0.628747	0.736791	0.727318	6.89793	0.0752231	N	N	0.773186	0.773154	0.747742	0.683444	7.41282	0.0598413	NA	NA	NA	NA	seq.17756.69	OID30657	0.719323	0.757896
Q7Z4W1	DCXR	L-xylulose reductase	seq.17758.79	OID21480	1	0.764424	0.750975	Y	N	0.780116	0.727871	0.722859	0.791137	8.19188	0.0422081	N	N	0.713695	0.775984	0.765895	0.722435	5.91395	0.115872	NA	NA	NA	NA	seq.17758.79	OID21480	0.722613	0.723207
Q9UKK9	NUDT5	ADP-sugar pyrophosphatase	seq.17761.2	OID21115	1	0.364911	0.537372	N	N	0.38071	0.341687	0.390257	0.326667	1.81356	0.611988	N	N	0.563237	0.533168	0.501212	0.527319	1.3078	0.727282	0.355	0.682	NA	NA	seq.17761.2	OID21115	0.324639	0.598695
P08134	RHOC	Rho-related GTP-binding protein RhoC	seq.17764.108	OID20950	1	0.753553	0.787703	Y	N	0.787315	0.636595	0.787268	0.734434	17.9643	0.000447371	Y	N	0.815676	0.773685	0.815285	0.683405	17.0325	0.000695959	NA	NA	NA	NA	seq.17764.108	OID20950	0.416656	0.654297
Q9UJM8	HAOX1	Hydroxyacid oxidase 1	seq.17768.50	OID21395	1	0.529024	0.510373	N	N	0.50338	0.536391	0.56348	0.518179	1.33134	0.721704	N	N	0.531889	0.505193	0.480586	0.50282	0.815781	0.845689	0.529	0.522	NA	0.5	seq.17768.50	OID21395	0.50841	0.478799
Q9UI15	TAGL3	Transgelin-3	seq.17775.8	OID31225	1	0.0467283	0.0292176	N	N	0.0605181	0.120908	-0.0801336	0.0424268	5.66562	0.129062	N	N	-0.104569	0.0415426	0.0404335	0.102018	6.34349	0.0960434	NA	NA	NA	NA	seq.17775.8	OID31225	0.0246949	0.0130697
Q9BY49	PECR	Peroxisomal trans-2-enoyl-CoA reductase	seq.17776.15	OID30228	1	0.0262719	0.181368	N	N	0.00732436	0.0339298	0.0790531	0.0242092	0.922365	0.820028	N	N	0.258001	0.204452	0.140813	0.177845	2.72797	0.435495	NA	NA	NA	NA	seq.17776.15	OID30228	0.321254	0.35424
Q9H492	MLP3A	Microtubule-associated proteins 1A/1B light chain 3A	seq.17781.191	OID30868	1	0.0302577	0.0262732	N	N	0.0176499	0.103204	0.0475963	0.00202044	2.06557	0.558909	N	N	0.0608683	-0.00140994	0.0232601	0.0770512	1.62211	0.654387	NA	NA	NA	NA	seq.17781.191	OID30868	0.0526543	0.0778237
P09110	THIK	3-ketoacyl-CoA thiolase, peroxisomal	seq.17782.23	OID21269	1	0.683526	0.715833	N	N	0.692871	0.674624	0.639152	0.671756	1.57959	0.664028	N	N	0.67376	0.707952	0.72737	0.681198	2.40344	0.492995	NA	NA	NA	NA	seq.17782.23	OID21269	0.539906	0.615833
O43598	RCL	2'-deoxynucleoside 5'-phosphate N-hydrolase 1	seq.17785.11	OID20744	1	0.167206	0.406307	N	N	0.10616	0.244781	0.142305	0.210143	4.85922	0.182401	N	N	0.390799	0.44193	0.361744	0.43188	3.06041	0.382405	NA	NA	NA	NA	seq.17785.11	OID20744	0.524595	0.589659
P30084	Enoyl-CoA hydratase	Enoyl-CoA hydratase, mitochondrial	seq.17787.1	OID30239	1	0.580001	0.603398	N	N	0.618975	0.579638	0.609295	0.580498	1.34528	0.718411	N	N	0.641051	0.605185	0.620801	0.598994	0.91014	0.82298	NA	NA	NA	NA	seq.17787.1	OID30239	0.470421	0.514734
P37235	HPCL1	Hippocalcin-like protein 1	seq.17791.25	OID20615	1	0.0771986	0.403671	N	N	0.0969257	0.0925139	0.0947841	0.0320658	1.88862	0.595842	N	N	0.443518	0.410994	0.397212	0.348881	1.66723	0.644243	NA	NA	NA	NA	seq.17791.25	OID20615	0.528042	0.600256
P51649	SSDH	Succinate-semialdehyde dehydrogenase, mitochondrial	seq.17792.158	OID31047	1	-0.00951012	0.0686473	N	N	-0.0346118	0.0212725	0.0491992	0.0103797	1.30145	0.728788	N	N	0.107123	0.096449	0.0488869	0.071853	0.87318	0.831895	NA	NA	NA	NA	seq.17792.158	OID31047	0.0518247	0.172418
O15305	Phosphomannomutase 2	Phosphomannomutase 2	seq.17794.6	OID30125	1	0.412176	0.441933	N	N	0.43799	0.371696	0.457918	0.382556	2.87184	0.41181	N	N	0.484382	0.413327	0.467565	0.414206	2.59468	0.458424	NA	NA	NA	NA	seq.17794.6	OID30125	0.626031	0.613823
O15116	LSM1	U6 snRNA-associated Sm-like protein LSm1	seq.17795.176	OID21210	1	0.0980148	0.107368	N	N	0.0978303	0.127865	0.10806	0.0870664	0.350585	0.95025	N	N	0.112194	0.1045	0.0885861	0.146588	0.533452	0.911483	NA	NA	NA	NA	seq.17795.176	OID21210	0.424811	0.482316
P29218	IMPA1	Inositol monophosphatase 1	seq.17796.15	OID20907	1	-0.0441554	0.170704	N	N	-0.0820472	-0.00656125	-0.0241478	-0.057173	1.10737	0.775295	N	N	0.217809	0.177147	0.119839	0.186669	1.9377	0.585439	-0.064	0.397	NA	NA	seq.17796.15	OID20907	-0.148396	0.255156
O75940	SPF30	Survival of motor neuron-related-splicing factor 30	seq.17805.35	OID31471	1	0.629895	0.718145	N	N	0.622664	0.615315	0.651005	0.62629	0.553589	0.90697	N	N	0.717889	0.723428	0.708635	0.688286	0.999477	0.801379	NA	NA	NA	NA	seq.17805.35	OID31471	0.752165	0.819924
Q9NQR4	NIT2	Omega-amidase NIT2	seq.17808.37	OID30336	1	0.625972	0.660904	N	N	0.594994	0.628144	0.662358	0.613063	2.25003	0.522161	N	N	0.694479	0.652257	0.624138	0.654866	2.62447	0.453217	NA	NA	NA	NA	seq.17808.37	OID30336	0.70101	0.73824
Q9Y2Z0	SUGT1	Protein SGT1 homolog	seq.17818.22	OID21229	1	0.781487	0.799995	N	N	0.806378	0.732371	0.800863	0.764591	7.14375	0.0674544	N	N	0.814406	0.787152	0.822218	0.75624	6.08459	0.107567	NA	NA	NA	NA	seq.17818.22	OID21229	0.665693	0.782258
P29692	EF1D	Elongation factor 1-delta	seq.17826.341	OID30335	1	0.621663	0.663155	Y	N	0.666836	0.489678	0.637957	0.602353	11.5776	0.00897954	Y	N	0.662029	0.652771	0.698415	0.551647	8.93407	0.0301804	NA	NA	NA	NA	seq.17826.341	OID30335	0.496448	0.570755
Q9HCY8	S100A14	Protein S100-A14	seq.17828.3	OID30987	1	0.420647	0.38585	Y	N	0.506962	0.353044	0.478411	0.369232	11.6197	0.00880629	Y	N	0.497726	0.324305	0.455001	0.327316	14.0556	0.00283046	NA	NA	NA	NA	seq.17828.3	OID30987	0.523407	0.329885
Q9BXS1	IDI2	Isopentenyl-diphosphate delta-isomerase 2	seq.17832.12	OID20823	1	0.269288	0.278217	N	N	0.316349	0.246901	0.20891	0.264474	2.42109	0.489721	N	N	0.226082	0.283388	0.335418	0.216084	3.61539	0.306102	NA	NA	NA	NA	seq.17832.12	OID20823	0.319111	0.269268
Q96FQ6	S100A16	Protein S100-A16	seq.17836.17	OID20878	1	0.111627	0.0924824	N	N	0.139731	0.0859442	0.12051	0.0910024	0.878806	0.830539	N	N	0.0654294	0.0431787	0.157048	0.120652	4.37531	0.223686	NA	NA	NA	NA	seq.17836.17	OID20878	0.148062	0.111679
O43474	KLF4	Krueppel-like factor 4	seq.17850.42	OID30808	1	0.00983771	0.176031	N	N	0.00228853	0.0794396	-0.0202749	0.00207707	1.43509	0.69733	N	N	0.0649478	0.193512	0.177795	0.218171	4.23016	0.237659	NA	NA	NA	NA	seq.17850.42	OID30808	0.0162889	0.126003
Q9Y570	PPME1	Protein phosphatase methylesterase 1	seq.17852.5	OID21347	1	0.799902	0.802898	Y	Y	0.862671	0.725316	0.762946	0.778976	30.6438	1.01024e-06	Y	N	0.753487	0.792505	0.855371	0.739071	22.9831	4.07125e-05	NA	NA	NA	NA	seq.17852.5	OID21347	0.753415	0.822884
P41227	NAA10	N-alpha-acetyltransferase 10	seq.17854.33	OID30188	1	0.605908	0.611029	N	N	0.594731	0.555702	0.644212	0.599	2.46942	0.480843	N	N	0.64979	0.600386	0.603691	0.573811	2.06858	0.558295	0.625	0.722	NA	NA	seq.17854.33	OID30188	0.718063	0.775489
Q14790	Caspase-8	Caspase-8	seq.18158.45	OID21414	1	-0.303649	0.126608	N	N	-0.343056	-0.195531	-0.293163	-0.282717	3.87413	0.27538	N	N	0.0828584	0.178567	0.12735	0.171992	2.41799	0.490294	0.084	0.456	NA	-0.12	seq.18158.45	OID21414	-0.119886	0.259287
Q9NWZ3	IRAK4	Interleukin-1 receptor-associated kinase 4	seq.18162.167	OID20577	1	0.700094	0.72102	Y	N	0.707844	0.571638	0.76341	0.685919	16.2097	0.00102709	Y	N	0.786479	0.716813	0.723782	0.60585	16.1899	0.00103672	0.63	0.691	NA	NA	seq.18162.167	OID20577	0.736199	0.80214
O14625	I-TAC	C-X-C motif chemokine 11	seq.18171.25	OID21042	2	-0.104076	0.202406	N	N	-0.17451	-0.028507	-0.0417802	-0.105238	4.6408	0.20007	N	N	0.173815	0.210555	0.223985	0.209536	0.474709	0.924412	NA	NA	0.82	0.91	seq.3038.9	OID21042	0.782917	0.803612
Q99536	VAT1	Synaptic vesicle membrane protein VAT-1 homolog	seq.18175.65	OID21382	1	0.175379	0.1913	N	N	0.112001	0.270715	0.197747	0.177061	4.27289	0.233465	N	N	0.204739	0.190054	0.148	0.27915	2.88686	0.409399	NA	NA	NA	NA	seq.18175.65	OID21382	-0.113172	-0.00850088
P52788	SPSY	Spermine synthase	seq.18179.56	OID30853	1	0.115926	0.176467	N	N	0.078005	0.129533	0.23927	0.0938668	5.60589	0.132441	N	N	0.30314	0.147792	0.156416	0.214943	6.28171	0.0986805	NA	NA	NA	NA	seq.18179.56	OID30853	0.176924	0.444199
Q8WWV3	RT4I1	Reticulon-4-interacting protein 1, mitochondrial	seq.18180.58	OID31030	1	0.71432	0.729023	Y	N	0.760583	0.5531	0.733812	0.711262	21.9239	6.76531e-05	Y	N	0.757854	0.72948	0.757798	0.600812	15.2231	0.0016356	NA	NA	NA	NA	seq.18180.58	OID31030	0.416999	0.493055
Q5SW96	ARH	Low density lipoprotein receptor adapter protein 1	seq.18183.3	OID31068	1	0.776782	0.790876	Y	N	0.774549	0.700786	0.822861	0.770037	11.0147	0.0116467	Y	N	0.833998	0.785134	0.788649	0.716206	11.3266	0.0100846	NA	NA	NA	NA	seq.18183.3	OID31068	0.70146	0.803643
P26639	SYTC	Threonine--tRNA ligase, cytoplasmic	seq.18186.15	OID31343	1	0.724476	0.7277	N	N	0.739397	0.67915	0.743386	0.715219	2.98972	0.393212	N	N	0.758584	0.718458	0.73758	0.673892	4.31129	0.229753	NA	NA	NA	NA	seq.18186.15	OID31343	0.584278	0.591565
P43487	RANG	Ran-specific GTPase-activating protein	seq.18191.23	OID30258	1	0.647831	0.656698	Y	N	0.722686	0.537385	0.628897	0.623232	16.978	0.000714139	Y	N	0.650118	0.642411	0.718413	0.526193	15.6892	0.00131306	NA	NA	NA	NA	seq.18191.23	OID30258	0.702339	0.733937
Q9UBU8	MO4L1	Mortality factor 4-like protein 1	seq.18193.165	OID31257	1	0.0978743	0.12521	N	N	0.110316	0.130949	0.135345	0.0700295	1.45281	0.693204	N	N	0.152207	0.0861381	0.134956	0.261373	6.26342	0.0994743	NA	NA	NA	NA	seq.18193.165	OID31257	0.312032	0.291477
Q0Z7S8	FABP9	Fatty acid-binding protein 9	seq.18194.18	OID20501	1	0.115924	0.0908363	N	N	0.0505441	0.0993794	0.0386548	0.105067	1.53094	0.675147	N	N	0.0486834	0.0599607	0.0673814	0.0940072	0.29296	0.961347	0.089	0.096	NA	0.1	seq.18194.18	OID20501	0.124136	0.076613
Q8WV07	ORAV1	Oral cancer-overexpressed protein 1	seq.18195.3	OID20434	1	0.00787351	0.018307	N	N	0.0898454	-0.0758809	0.0386233	-0.0261934	5.8738	0.117914	N	N	0.0406831	-0.00237178	0.0944699	-0.0738126	5.02567	0.169927	NA	NA	NA	NA	seq.18195.3	OID20434	-0.0189976	-0.0164155
P43652	Afamin	Afamin	seq.18196.8	OID30741	2	0.594202	0.608449	Y	N	0.574432	0.468602	0.632306	0.634693	12.1141	0.00700224	Y	N	0.627554	0.645014	0.590838	0.474348	12.2427	0.00659623	NA	NA	NA	NA	seq.4763.31	OID30741	0.611443	0.620661
P09105	HBAT	Hemoglobin subunit theta-1	seq.18198.51	OID21433	1	0.034055	0.102377	N	N	0.0526226	0.0711291	0.119012	-0.0187158	5.03061	0.169569	N	N	0.0979341	0.0654547	0.141318	0.111846	1.85497	0.603047	NA	NA	NA	NA	seq.18198.51	OID21433	0.244203	0.44379
P48507	GSH0	Glutamate--cysteine ligase regulatory subunit	seq.18214.2	OID30059	1	0.385055	0.392025	N	N	0.435729	0.414771	0.333221	0.362379	3.50593	0.319994	N	N	0.327578	0.371558	0.446773	0.426117	4.33937	0.227074	NA	NA	NA	NA	seq.18214.2	OID30059	0.782255	0.791078
Q9NR46	SHLB2	Endophilin-B2	seq.18222.34	OID31145	1	0.745805	0.763825	N	N	0.777724	0.705902	0.751809	0.732353	4.97499	0.173638	N	N	0.768484	0.756931	0.782116	0.71375	3.80724	0.283045	NA	NA	NA	NA	seq.18222.34	OID31145	0.661835	0.7753
Q9HD42	CHM1A	Charged multivesicular body protein 1a	seq.18224.11	OID20930	1	0.798617	0.81339	Y	N	0.813741	0.751452	0.833591	0.783006	8.48322	0.0370126	Y	N	0.84925	0.801318	0.823084	0.77068	8.12871	0.0434252	NA	NA	NA	NA	NA	NA	NA	NA
Q9NRV9	HEBP1	Heme-binding protein 1	seq.18225.13	OID20063	1	0.0654058	0.0607653	N	N	0.111482	0.0443687	-0.0571023	0.0979652	6.08713	0.107447	N	N	-0.0369792	0.0881388	0.0885857	0.0765203	3.61407	0.306266	NA	NA	NA	NA	seq.18225.13	OID20063	0.0499092	0.0581392
Q9UKY0	PRND	Prion-like protein doppel	seq.18231.147	OID31124	1	0.0108887	0.0327644	N	N	0.0275729	-0.043854	0.0278047	0.00112288	0.922816	0.819919	N	N	0.0462637	0.0262253	0.0997074	-0.0686385	4.40524	0.2209	NA	NA	NA	NA	seq.18231.147	OID31124	0.0569997	0.0812502
P47874	OMP	Olfactory marker protein	seq.18240.6	OID30835	1	-0.00802198	0.0131802	N	N	-0.021664	-0.0102721	-0.0763193	0.00662902	1.49629	0.683127	N	N	-0.0657425	0.00964738	0.034545	0.0597679	2.40479	0.492744	NA	NA	NA	NA	seq.18240.6	OID30835	0.0914495	0.11537
P36551	HEM6	Oxygen-dependent coproporphyrinogen-III oxidase, mitochondrial	seq.18241.18	OID30495	1	0.390664	0.413284	N	N	0.393147	0.395563	0.40576	0.388662	0.0897887	0.993034	N	N	0.446624	0.42097	0.402836	0.399293	0.611836	0.893718	NA	NA	NA	NA	seq.18241.18	OID30495	0.301257	0.456686
Q04837	SSB	Single-stranded DNA-binding protein, mitochondrial	seq.18253.8	OID30468	1	-0.0168698	0.00179527	N	N	-0.0737805	0.0669348	-0.0103855	-0.0135625	3.04528	0.384697	N	N	-0.0126329	0.0111196	-0.0426781	0.069735	2.05729	0.560601	NA	NA	NA	NA	NA	NA	NA	NA
Q6NT46	GAG2A	G antigen 2A	seq.18268.5	OID31199	1	0.0279928	0.0588179	N	N	0.0585053	0.0852555	0.0464458	0.0104843	1.41941	0.700991	N	N	0.0583852	0.05696	0.081682	0.111847	0.663732	0.8817	NA	NA	NA	NA	seq.18268.5	OID31199	0.0614278	0.0242328
O95988	TCL1B	T-cell leukemia/lymphoma protein 1B	seq.18276.34	OID20058	1	-0.0263205	0.0229083	N	N	0.0167159	-0.150324	-0.0668399	-0.0178721	4.8075	0.186448	N	N	0.00556455	0.0102916	0.0451437	-0.0223318	0.756991	0.859724	0.002	0.027	NA	NA	seq.18276.34	OID20058	-0.00935291	-0.00826612
O43715	TRIA1	TP53-regulated inhibitor of apoptosis 1	seq.18277.28	OID21403	1	-0.128508	0.291387	N	N	-0.0998113	-0.0724953	-0.157695	-0.158312	2.14385	0.543093	N	N	0.292062	0.285214	0.323148	0.302143	0.53538	0.911053	NA	NA	NA	NA	seq.18277.28	OID21403	-0.0307813	0.415523
Q16663	MIP-5	C-C motif chemokine 15	seq.18289.16	OID20328	1	0.802094	0.848805	Y	Y	0.842939	0.772634	0.871378	0.731644	49.2984	1.12695e-10	Y	Y	0.898271	0.791874	0.885023	0.828285	49.7016	9.24809e-11	0.811	0.857	0.9	0.85	seq.18289.16	OID20328	0.64229	0.707433
P38936	p21	Cyclin-dependent kinase inhibitor 1	seq.18291.8	OID21319	1	0.306088	0.4825	N	N	0.343026	0.294615	0.387035	0.284753	3.43236	0.329642	N	N	0.577126	0.470321	0.513192	0.434354	6.23284	0.100816	0.731	0.756	NA	NA	seq.18291.8	OID21319	0.704	0.727217
P48431	SOX2	Transcription factor SOX-2	seq.18294.26	OID30981	1	-0.0032523	0.0185302	N	N	0.0450941	0.0203528	0.0495237	-0.0464598	3.6618	0.300375	N	N	0.0635877	-0.0198783	0.0434558	0.0774157	3.00531	0.390806	NA	NA	NA	NA	seq.18294.26	OID30981	-0.0101374	-0.0221878
Q9UBQ7	GRHPR	Glyoxylate reductase/hydroxypyruvate reductase	seq.18295.102	OID30289	1	0.65521	0.713233	N	N	0.626598	0.644685	0.64535	0.635531	0.22546	0.973378	N	N	0.705748	0.707789	0.672256	0.718837	1.7802	0.619254	NA	NA	NA	NA	seq.18295.102	OID30289	0.457422	0.577715
Q92686	NEUG	Neurogranin	seq.18303.39	OID30674	1	0.659878	0.761002	Y	N	0.714904	0.546604	0.59131	0.648489	14.8692	0.00193187	N	N	0.738516	0.749613	0.79128	0.701802	6.99232	0.072143	NA	NA	NA	NA	seq.18303.39	OID30674	0.147245	0.493776
O75781	PALM	Paralemmin-1	seq.18306.1	OID31515	1	0.0824725	0.112526	N	N	0.0580161	0.0371114	0.0489267	0.0388569	0.127854	0.988297	N	N	-0.0198421	0.125452	0.142165	0.0511341	5.92822	0.115155	NA	NA	NA	NA	seq.18306.1	OID31515	0.0665567	0.071942
O00399	DCTN6	Dynactin subunit 6	seq.18311.44	OID20879	1	0.328255	0.365395	Y	N	0.279293	0.362581	0.499102	0.274675	16.5464	0.000875962	Y	N	0.52066	0.319335	0.320872	0.406098	14.4857	0.00231338	NA	NA	NA	NA	seq.18311.44	OID20879	0.454306	0.486452
Q7L266	Asparaginase-like protein 1	Isoaspartyl peptidase/L-asparaginase	seq.18313.4	OID30283	1	0.142268	0.370982	N	N	0.130249	0.208802	0.108532	0.141999	1.46259	0.690931	N	N	0.350047	0.383738	0.367248	0.430866	1.28439	0.732843	NA	NA	NA	NA	seq.18313.4	OID30283	0.516695	0.549827
Q9UH03	2024-09-03	Neuronal-specific septin-3	seq.18316.75	OID31025	1	-0.0309082	0.0259708	N	N	0.0140086	-0.0465695	0.0427136	-0.073685	4.13704	0.247042	N	N	0.0314498	0.0139144	0.0836424	-0.0542718	3.06996	0.380964	NA	NA	NA	NA	seq.18316.75	OID31025	0.0110452	0.086964
Q99963	SH3G3	Endophilin-A3	seq.18318.98	OID31334	1	0.0441039	0.0405179	N	N	0.0885117	0.0580752	0.085908	0.0246458	1.61561	0.655855	N	N	0.0906311	0.0184668	0.0799135	0.056883	1.78714	0.617738	NA	NA	NA	NA	seq.18318.98	OID31334	0.185049	0.192724
P13995	MTDC	Bifunctional methylenetetrahydrofolate dehydrogenase/cyclohydrolase, mitochondrial	seq.18321.38	OID31078	1	0.425207	0.431899	N	N	0.395787	0.348635	0.488979	0.433814	4.27817	0.232951	N	N	0.488881	0.437737	0.40831	0.355901	3.66739	0.299693	NA	NA	NA	NA	seq.18321.38	OID31078	0.33891	0.387236
P51687	SUOX	Sulfite oxidase, mitochondrial	seq.18324.61	OID31031	1	0.00348342	0.153556	N	N	-0.00741796	0.10007	0.00707884	-0.00694414	2.25979	0.520269	N	N	0.191435	0.165669	0.0634382	0.22087	5.3025	0.150941	NA	NA	NA	NA	seq.18324.61	OID31031	0.0649964	0.267011
Q9Y5X3	SNX5	Sorting nexin-5	seq.18327.6	OID30215	1	0.501777	0.49735	Y	N	0.47283	0.484596	0.611466	0.483688	8.25807	0.0409687	Y	N	0.612189	0.471713	0.47746	0.513219	9.02725	0.0289307	NA	NA	NA	NA	seq.18327.6	OID30215	0.54497	0.635272
Q96G03	PGM2	Phosphoglucomutase-2	seq.18330.7	OID30904	1	0.0318898	0.065161	N	N	0.014467	0.0226198	-0.0787145	0.0812818	5.79237	0.122161	N	N	-0.0510709	0.108115	0.0678143	0.0414185	5.58639	0.133562	NA	NA	NA	NA	seq.18330.7	OID30904	0.365992	0.402467
P04062	GLCM	Glucosylceramidase	seq.18331.3	OID30966	1	0.00797565	0.0805082	N	N	-0.0298033	-0.0508813	0.000621389	0.0268826	1.65536	0.646903	N	N	0.0756783	0.112009	-0.0123298	0.100899	4.79183	0.18769	NA	NA	NA	NA	NA	NA	NA	NA
P32320	CDA	Cytidine deaminase	seq.18336.31	OID30345	1	0.0430764	0.111418	N	N	0.132229	-0.0355803	0.102595	0.0257755	5.95332	0.113903	Y	N	0.178468	0.0844919	0.212316	0.033899	7.82396	0.0497935	NA	NA	NA	NA	NA	NA	NA	NA
P08590	Myosin light chain 1	Myosin light chain 3	seq.18376.19	OID30251	1	0.844071	0.855874	N	N	0.828586	0.848134	0.851284	0.840097	1.2272	0.746488	N	N	0.863174	0.849269	0.84467	0.866121	1.53665	0.673838	NA	NA	NA	NA	seq.18376.19	OID30251	0.88747	0.879142
P05091	ALDH-E2	Aldehyde dehydrogenase, mitochondrial	seq.18381.16	OID31380	1	0.319769	0.305392	Y	N	0.242167	0.494463	0.24784	0.344298	15.4687	0.00145692	Y	N	0.233104	0.332556	0.212772	0.459068	14.2592	0.00257273	NA	NA	NA	NA	seq.18381.16	OID31380	0.384839	0.382063
P21964	Catechol O-methyltransferase	Catechol O-methyltransferase	seq.18382.109	OID20086	1	-0.113634	0.0512922	N	N	-0.107791	-0.087514	0.0506161	-0.134093	7.39077	0.0604325	N	N	0.211437	0.0319018	0.0631138	0.0493757	7.20244	0.0657177	0.291	0.349	NA	NA	seq.18382.109	OID20086	0.191974	0.404394
P35754	GLRX1	Glutaredoxin-1	seq.18386.36	OID20195	1	0.0275907	0.261007	N	N	0.0257956	0.0657134	-0.00963896	0.0296338	0.718067	0.868946	N	N	0.258148	0.280412	0.255261	0.253481	0.336152	0.953092	0.396	0.45	NA	NA	seq.18386.36	OID20195	0.214246	0.441333
P50502	suppression of tumorigenicity 13	Hsc70-interacting protein	seq.18387.7	OID30624	1	0.592906	0.714654	Y	N	0.655033	0.528168	0.555665	0.567314	8.37544	0.0388575	N	N	0.693219	0.709738	0.731463	0.677922	2.03514	0.565145	NA	NA	NA	NA	seq.18387.7	OID30624	0.256467	0.446512
P17516	AK1C4	Aldo-keto reductase family 1 member C4	seq.18397.5	OID20062	1	0.271212	0.285206	N	N	0.245391	0.367027	0.284729	0.248671	3.51948	0.318244	N	N	0.283354	0.271838	0.240887	0.388535	4.25697	0.23502	NA	NA	NA	NA	seq.18397.5	OID20062	0.183802	0.190044
Q6NXT1	ANR54	Ankyrin repeat domain-containing protein 54	seq.18404.22	OID21162	1	0.000986193	0.175689	N	N	-0.0173027	0.0920049	0.0342179	0.011439	1.91341	0.590573	N	N	0.208392	0.205459	0.108991	0.213691	3.4234	0.330834	NA	NA	NA	NA	seq.18404.22	OID21162	0.427715	0.512618
Q9Y2Y0	AR2BP	ADP-ribosylation factor-like protein 2-binding protein	seq.18407.36	OID30121	1	0.270934	0.390564	N	N	0.307874	0.171299	0.320817	0.246971	4.52695	0.209899	N	N	0.412256	0.389535	0.430362	0.276314	4.96169	0.174624	NA	NA	NA	NA	seq.18407.36	OID30121	0.143837	0.3844
P12830	Cadherin E	Cadherin-1	seq.18429.10	OID20353	1	0.272971	0.320904	N	N	0.201328	0.262904	0.303888	0.279169	2.68109	0.443451	N	N	0.335219	0.335742	0.229483	0.298622	4.2987	0.230964	0.3	0.243	0.13	0.39	seq.18429.10	OID20353	0.165392	0.204289
P11234	RALB	Ras-related protein Ral-B	seq.18432.32	OID30567	1	0.126691	0.13379	Y	N	0.116882	0.271065	0.179768	0.0456719	11.7392	0.00833202	Y	N	0.180135	0.0529834	0.138051	0.27164	11.148	0.0109518	NA	NA	NA	NA	seq.18432.32	OID30567	0.256415	0.270932
Q9H7Z7	PGES2	Prostaglandin E synthase 2	seq.18458.4	OID30561	1	0.453853	0.460215	Y	N	0.504226	0.347819	0.523751	0.414421	9.81964	0.0201632	Y	N	0.518903	0.41977	0.522332	0.401368	8.08913	0.0442051	NA	NA	NA	NA	seq.18458.4	OID30561	0.389855	0.465129
Q96JA1	LRIG1	Leucine-rich repeats and immunoglobulin-like domains protein 1	seq.18831.6	OID21429	1	0.780736	0.815554	N	N	0.696037	0.751766	0.745783	0.725425	2.8466	0.415886	N	N	0.760009	0.773445	0.763427	0.796647	1.36953	0.712692	0.692	0.724	NA	NA	seq.18831.6	OID21429	0.700717	0.724384
P01266	Thyroglobulin	Thyroglobulin	seq.18839.24	OID31359	1	0.130736	0.112719	N	N	0.138049	0.113115	0.173865	0.120302	0.735715	0.864773	N	N	0.192651	0.0981402	0.146833	0.0954994	2.42578	0.488854	NA	NA	NA	NA	seq.18839.24	OID31359	0.12644	0.113493
Q8N5S9	CaMKK alpha	Calcium/calmodulin-dependent protein kinase kinase 1	seq.18860.2	OID21182	1	-0.17826	0.110084	Y	N	-0.289587	-0.131112	-0.203582	-0.129563	9.1144	0.0278079	N	N	0.132202	0.116717	0.113283	0.104557	0.107622	0.990907	0.334	0.448	0.12	NA	seq.18860.2	OID21182	0.167647	0.394947
P07766	CD3E	T-cell surface glycoprotein CD3 epsilon chain	seq.18870.1	OID31302	2	-0.0382363	-0.0141063	Y	N	-0.09561	-0.109653	0.126498	-0.0352195	10.1097	0.0176566	Y	N	0.12804	0.00236409	-0.0944796	-0.0600178	9.12156	0.0277176	NA	NA	NA	NA	seq.18870.1, seq.8069.85	OID31302, OID31302	0.021553009, -0.022604797	0.046895487, 0.009492432
Q9BQI0	AIF1L	Allograft inflammatory factor 1-like	seq.18871.24	OID30204	1	0.310983	0.353306	N	N	0.345793	0.215886	0.360175	0.315624	3.81709	0.281904	N	N	0.373042	0.36439	0.360004	0.290983	1.40566	0.704207	NA	NA	NA	NA	seq.18871.24	OID30204	0.480515	0.495962
P31997	CEAM8	Carcinoembryonic antigen-related cell adhesion molecule 8	seq.18873.8	OID20102	1	0.480238	0.551374	N	N	0.415365	0.329639	0.520422	0.43653	7.08403	0.0692672	N	N	0.575589	0.531368	0.512191	0.408007	6.68223	0.0827465	0.309	0.593	NA	0.63	seq.18873.8	OID20102	0.510409	0.655799
P49715	CEBPA	CCAAT/enhancer-binding protein alpha	seq.18874.66	OID30458	1	0.0262011	0.0757427	N	N	0.00595063	0.101791	0.0799424	-0.00710666	3.29512	0.348322	N	N	0.128323	0.0587003	0.042984	0.2033	5.28644	0.151985	NA	NA	NA	NA	seq.18874.66	OID30458	0.180325	0.188499
P02458	Chondrocalcin	Chondrocalcin	seq.18875.125	OID30286	1	0.659764	0.643417	Y	N	0.591525	0.629442	0.728462	0.64728	10.3462	0.0158415	N	N	0.70311	0.63211	0.585128	0.608107	7.28337	0.0633938	NA	NA	NA	NA	seq.15569.15, seq.18875.125	OID30286, OID30286	0.159290137, 0.852432985	0.273817782, 0.849123699
P02461	Collagen Type III	Collagen Type III	seq.18880.81	OID30379	1	0.556889	0.597281	N	N	0.503682	0.600524	0.610491	0.554909	5.19574	0.158012	N	N	0.639438	0.591697	0.540514	0.647737	5.95048	0.114044	NA	NA	NA	NA	seq.18880.81	OID30379	0.594692	0.629668
P48960	CD97	CD97 antigen	seq.18881.7	OID20260	1	0.597682	0.668034	N	N	0.589388	0.671125	0.581798	0.59861	3.54189	0.315369	N	N	0.649592	0.675907	0.65847	0.709153	1.89006	0.595535	0.449	0.592	-0.09	NA	seq.18881.7	OID20260	0.563952	0.571405
Q9H4D0	CSTN2	Calsyntenin-2	seq.18882.7	OID20664	1	0.655255	0.690333	N	N	0.670099	0.687616	0.677381	0.642471	1.86516	0.60086	N	N	0.677967	0.671796	0.739779	0.697649	5.7555	0.124131	0.703	0.713	NA	NA	seq.18882.7	OID20664	0.66246	0.694739
Q9Y5L3	ENTP2	Ectonucleoside triphosphate diphosphohydrolase 2	seq.18887.7	OID21260	1	0.0300034	0.0404651	N	N	0.0385709	0.0497681	-0.0157924	0.0191652	0.695035	0.874371	N	N	0.0424038	0.0105997	0.0489172	0.0451879	0.599219	0.896611	-0.001	0.152	NA	0.11	seq.18887.7	OID21260	0.0193241	0.0534107
P32456	GBP2	Guanylate-binding protein 2	seq.18891.98	OID20489	1	0.161635	0.26444	N	N	0.112215	0.212263	0.180127	0.153663	1.81375	0.611947	N	N	0.267131	0.262868	0.236379	0.275496	0.362227	0.94793	0.121	0.427	NA	NA	seq.18891.98	OID20489	0.340673	0.453673
Q9Y653	GPR56	Adhesion G-protein coupled receptor G1	seq.18893.26	OID21294	1	0.506528	0.518714	Y	N	0.455803	0.583174	0.640632	0.476577	17.0649	0.000685366	N	N	0.595437	0.504893	0.484189	0.585973	6.68308	0.0827153	0.232	0.315	NA	0.79	seq.18893.26	OID21294	0.460403	0.443263
Q03013	GSTM4	Glutathione S-transferase Mu 4	seq.18895.54	OID30164	1	0.222387	0.232017	N	N	0.230957	0.285444	0.241898	0.17744	3.05147	0.383758	N	N	0.262334	0.185135	0.239976	0.295319	3.4527	0.326949	NA	NA	NA	NA	seq.18895.54	OID30164	0.437695	0.422482
P01112	H-ras (WT)	GTPase HRas	seq.18900.37	OID31263	1	0.0445301	0.0421413	N	N	0.0724435	0.115146	0.0863489	0.00105576	3.74924	0.289846	N	N	0.0954372	0.00438831	0.0466826	0.153307	4.98381	0.172987	NA	NA	NA	NA	seq.18900.37	OID31263	0.0334858	0.0417599
P43629	KI3L1	Killer cell immunoglobulin-like receptor 3DL1	seq.18907.97	OID21185	1	0.0158792	0.0196782	Y	N	0.107122	0.05224	-0.127396	0.0403063	9.66769	0.0216127	N	N	-0.109357	0.0544643	0.087785	0.0176512	7.39241	0.0603883	NA	NA	NA	NA	seq.18907.97	OID21185	0.0584435	0.0396332
Q99487	PAFA2	Platelet-activating factor acetylhydrolase 2, cytoplasmic	seq.18914.188	OID31286	1	0.259741	0.318108	N	N	0.269898	0.228362	0.334842	0.238964	2.62709	0.45276	N	N	0.390027	0.308316	0.337686	0.26575	2.88088	0.410358	NA	NA	NA	NA	seq.18914.188	OID31286	0.559014	0.625592
Q9BY32	Inosine triphosphatase	Inosine triphosphate pyrophosphatase	seq.18916.25	OID30082	1	0.660126	0.691853	N	N	0.669725	0.609465	0.719954	0.6408	6.34399	0.0960225	N	N	0.745114	0.672169	0.702372	0.657424	5.65067	0.129899	NA	NA	NA	NA	seq.18916.25	OID30082	0.789431	0.812511
P04746	Pancreatic alpha-amylase	Pancreatic alpha-amylase	seq.18917.53	OID20333	1	0.824676	0.846427	Y	N	0.862771	0.832602	0.781591	0.811535	13.3573	0.00392423	Y	N	0.823112	0.832472	0.882156	0.840292	12.5746	0.0056531	NA	NA	NA	NA	seq.18917.53	OID20333	0.748727	0.7782
O94813	SLIT2	Slit homolog 2 protein	seq.18930.28	OID20862	1	0.117717	0.209902	N	N	0.075193	0.154256	1.91892e-05	0.141737	5.30114	0.151028	Y	N	0.0883142	0.246064	0.1409	0.259961	8.30193	0.0401669	NA	NA	NA	NA	seq.18930.28	OID20862	0.0796578	0.171532
Q9HAN9	NMNA1	Nicotinamide/nicotinic acid mononucleotide adenylyltransferase 1	seq.18932.84	OID20913	1	-0.0980041	0.104811	Y	N	-0.107682	0.0878272	-0.0898805	-0.125311	8.58193	0.0353981	N	N	0.0599838	0.096165	0.132274	0.236379	4.89757	0.179453	-0.046	0.287	NA	NA	seq.18932.84	OID20913	-0.0317658	0.142836
P21980	Tissue transglutaminase	Protein-glutamine gamma-glutamyltransferase 2	seq.18934.50	OID20141	1	0.506256	0.507335	N	N	0.557325	0.470822	0.43844	0.500023	4.79769	0.187225	N	N	0.431794	0.505905	0.545205	0.489404	3.84585	0.278598	0.719	0.712	NA	0.84	seq.18934.50	OID20141	0.493348	0.519399
Q9UJC5	SH3L2	SH3 domain-binding glutamic acid-rich-like protein 2	seq.19113.66	OID30863	1	0.157721	0.163696	N	N	0.105603	0.164903	0.231904	0.147185	2.92159	0.403873	N	N	0.245523	0.15136	0.110176	0.178635	3.46229	0.325686	NA	NA	NA	NA	seq.19113.66	OID30863	0.518635	0.539427
Q96A00	PP14A	Protein phosphatase 1 regulatory subunit 14A	seq.19117.3	OID31011	1	0.74536	0.759487	Y	N	0.76337	0.592321	0.79953	0.742285	23.6935	2.89443e-05	Y	N	0.810755	0.754268	0.779157	0.624474	21.7266	7.43572e-05	NA	NA	NA	NA	seq.19117.3	OID31011	0.518185	0.582697
P13861	KAP2	cAMP-dependent protein kinase type II-alpha regulatory subunit	seq.19125.26	OID31119	1	-0.20707	0.285258	N	N	-0.264478	-0.174154	-0.13985	-0.204394	3.19834	0.362044	N	N	0.323821	0.326401	0.209409	0.254629	5.45384	0.141426	NA	NA	NA	NA	seq.19125.26	OID31119	0.139982	0.439996
O14558	HSPB6	Heat shock protein beta-6	seq.19127.1	OID21408	1	0.745332	0.809854	N	N	0.7138	0.716299	0.768865	0.72095	3.0728	0.380536	N	N	0.818539	0.796322	0.775708	0.802449	2.45217	0.483998	NA	NA	NA	NA	seq.19127.1	OID21408	0.796013	0.849768
Q2M296	MTHFSD	Methenyltetrahydrofolate synthase domain-containing protein	seq.19129.15	OID31305	1	0.529526	0.550038	N	N	0.535863	0.422504	0.550551	0.544635	5.08702	0.165535	N	N	0.591992	0.556879	0.568518	0.451206	5.42251	0.143347	NA	NA	NA	NA	seq.19129.15	OID31305	0.68061	0.663698
P50452	SPB8	Serpin B8	seq.19130.81	OID20630	1	0.528128	0.551931	N	N	0.533499	0.542072	0.477112	0.518911	1.26132	0.738338	N	N	0.5068	0.530976	0.57911	0.586451	3.05856	0.382684	0.641	0.673	NA	NA	seq.19130.81	OID20630	0.596376	0.552233
Q6BCY4	NB5R2	NADH-cytochrome b5 reductase 2	seq.19143.38	OID31512	1	0.642389	0.678265	Y	N	0.68289	0.575304	0.672989	0.578879	12.4662	0.00594555	Y	N	0.703212	0.619853	0.731791	0.610137	16.2358	0.00101448	NA	NA	NA	NA	seq.19143.38	OID31512	0.740622	0.774257
O60220	TIM8A	Mitochondrial import inner membrane translocase subunit Tim8 A	seq.19148.58	OID31143	1	0.56319	0.584456	Y	N	0.535791	0.451688	0.675164	0.542132	15.3789	0.00151986	Y	N	0.679223	0.575936	0.549031	0.481392	12.6635	0.00542393	NA	NA	NA	NA	seq.19148.58	OID31143	0.526243	0.599493
P41236	IPP2	Protein phosphatase inhibitor 2	seq.19152.4	OID20176	1	0.53052	0.622604	N	N	0.505838	0.458478	0.597682	0.531445	5.20797	0.157187	Y	N	0.676911	0.626162	0.613351	0.514799	8.32168	0.0398109	0.707	0.71	NA	NA	seq.19152.4	OID20176	0.661817	0.668615
P07093	Protease nexin I	Glia-derived nexin	seq.19154.41	OID30359	1	0.771112	0.775486	N	N	0.780507	0.757226	0.812198	0.751024	5.89731	0.116715	N	N	0.816752	0.753568	0.787598	0.771302	6.52812	0.08856	NA	NA	NA	NA	seq.19154.41	OID30359	0.767162	0.762857
Q96AG4	LRC59	Leucine-rich repeat-containing protein 59	seq.19163.26	OID30361	1	0.688397	0.702808	Y	N	0.732815	0.597283	0.716194	0.660571	11.8837	0.0077923	Y	N	0.728541	0.678354	0.746238	0.603022	12.9886	0.00466128	NA	NA	NA	NA	seq.19163.26	OID30361	0.274901	0.307131
O95630	STABP	STAM-binding protein	seq.19187.21	OID20955	1	0.715036	0.722528	Y	Y	0.796984	0.577722	0.773153	0.660839	43.2971	2.12824e-09	Y	N	0.783659	0.686873	0.776241	0.624269	24.1512	2.3228e-05	0.608	0.722	NA	0.75	seq.19187.21	OID20955	0.682707	0.753696
Q99733	NAP2L	nucleosome assembly protein 1-like 4	seq.19188.21	OID31475	1	0.808042	0.809222	Y	N	0.84144	0.742475	0.798318	0.797886	11.6195	0.00880687	Y	N	0.795134	0.798534	0.83916	0.75786	8.72649	0.0331573	NA	NA	NA	NA	seq.19188.21	OID31475	0.650389	0.646807
O14933	UB2L6	Ubiquitin/ISG15-conjugating enzyme E2 L6	seq.19190.4	OID30321	1	0.205932	0.281934	N	N	0.223888	0.0838362	0.253636	0.186157	4.44895	0.216889	Y	N	0.339911	0.265423	0.32447	0.116874	8.98663	0.0294692	NA	NA	NA	NA	seq.19190.4	OID30321	0.310372	0.380236
Q8TEA8	Histidyl-tRNA synthetase-related	D-tyrosyl-tRNA(Tyr) deacylase 1	seq.19194.9	OID30580	1	0.823443	0.831291	N	N	0.796434	0.805709	0.84346	0.823365	4.07524	0.253453	N	N	0.857407	0.833198	0.802193	0.809403	6.40607	0.0934414	NA	NA	NA	NA	seq.19194.9	OID30580	0.725861	0.765959
Q16718	NDUA5	NADH dehydrogenase [ubiquinone] 1 alpha subcomplex subunit 5	seq.19200.16	OID30520	1	-0.0443419	0.103029	N	N	-0.031123	0.00518479	-0.0805075	-0.0558891	1.11567	0.773293	N	N	0.0351241	0.129633	0.120865	0.0773323	2.21409	0.529178	NA	NA	NA	NA	seq.19200.16	OID30520	0.191879	0.343786
O60575	ISK4	Serine protease inhibitor Kazal-type 4	seq.19213.1	OID20509	1	0.3846	0.325944	N	N	0.419356	0.272457	0.286905	0.329417	6.10007	0.106842	N	N	0.230451	0.270493	0.33189	0.248766	2.53131	0.469659	NA	NA	NA	NA	seq.19213.1	OID20509	0.385848	0.294957
Q92597	NDRG1	Protein NDRG1	seq.19215.7	OID20792	1	-0.0195769	0.0878533	N	N	-0.0134759	-0.0170499	-0.0392074	-0.0162398	0.133391	0.987549	N	N	0.0789435	0.0985876	0.0955219	0.0682121	0.224085	0.973611	-0.074	0.32	NA	NA	seq.19215.7	OID20792	-0.0467454	0.181294
Q8WV28	BLNK	B-cell linker protein	seq.19225.11	OID30541	1	0.130628	0.298036	Y	N	0.211257	0.198626	0.135851	0.0475352	10.3796	0.0156001	N	N	0.20878	0.270308	0.373783	0.26535	6.48034	0.0904409	NA	NA	NA	NA	seq.19225.11	OID30541	0.371463	0.40568
Q16520	BATF	Basic leucine zipper transcriptional factor ATF-like	seq.19227.18	OID30896	1	-0.0870755	0.0583333	N	N	-0.0360991	-0.0724137	-0.0872055	-0.104276	1.42674	0.699278	N	N	-0.0399038	0.103525	0.0507039	0.00443527	5.27598	0.152669	NA	NA	NA	NA	seq.19227.18	OID30896	-0.0194595	0.108091
O75365	PRL-3	Protein tyrosine phosphatase type IVA 3	seq.19231.22	OID30469	1	-0.033584	0.0900605	N	N	-0.0355133	-0.0160549	-0.0953984	-0.0548844	0.94372	0.814866	N	N	0.042142	0.109141	0.0376724	0.0571185	2.08882	0.554177	NA	NA	NA	NA	seq.19231.22	OID30469	0.0231695	0.203758
O00244	ATOX1	Copper transport protein ATOX1	seq.19233.75	OID21476	1	0.470487	0.570317	N	N	0.47471	0.455869	0.415685	0.48317	1.60526	0.658198	N	N	0.491115	0.599783	0.583638	0.544721	5.63606	0.130723	NA	NA	NA	NA	seq.19233.75	OID21476	0.475866	0.563388
P30046	D-dopachrome decarboxylase	D-dopachrome decarboxylase	seq.19237.17	OID30372	1	0.0848768	0.263314	N	N	0.0261613	0.0974832	0.0709116	0.135753	3.83966	0.279306	N	N	0.245043	0.319695	0.184585	0.204233	7.54963	0.0562969	NA	NA	NA	NA	seq.19237.17	OID30372	0.257424	0.458276
Q13442	HAP28	28 kDa heat- and acid-stable phosphoprotein	seq.19240.265	OID30323	1	0.782372	0.784504	Y	N	0.789426	0.707349	0.815862	0.77201	9.24032	0.0262606	Y	N	0.830735	0.770936	0.792843	0.714651	11.7938	0.00812393	NA	NA	NA	NA	seq.19240.265	OID30323	0.770227	0.77715
P82980	RBP-III	Retinol-binding protein 5	seq.19241.31	OID21369	1	0.731679	0.752933	N	N	0.713211	0.697429	0.759369	0.730241	2.66058	0.446968	N	N	0.794854	0.752528	0.740147	0.700712	6.12813	0.10554	NA	NA	NA	NA	seq.19241.31	OID21369	0.780457	0.824274
Q9UHV9	PFD2	Prefoldin subunit 2	seq.19243.2	OID20892	1	0.094813	0.115382	N	N	0.109303	0.0293616	0.0646556	0.111178	1.58593	0.662585	N	N	0.134554	0.132598	0.112472	0.0484673	1.4158	0.701835	0.527	0.579	NA	NA	seq.19243.2	OID20892	0.343993	0.384814
Q8WUD1	RAB2B	Ras-related protein Rab-2B	seq.19253.82	OID31362	1	0.0783549	0.285119	N	N	0.124511	0.0710895	0.0538069	0.0786492	1.04813	0.789609	N	N	0.2181	0.307185	0.330856	0.255253	3.13479	0.371306	NA	NA	NA	NA	seq.19253.82	OID31362	0.219066	0.312578
P36959	GMPR1	GMP reductase 1	seq.19254.125	OID20641	1	0.418634	0.456525	Y	Y	0.648658	0.353492	0.601122	0.324185	71.8031	1.75422e-15	Y	Y	0.625418	0.376045	0.676545	0.403047	67.4749	1.4819e-14	NA	NA	NA	NA	seq.19254.125	OID20641	0.398267	0.446839
P09496	CLCA	Clathrin light chain A	seq.19257.11	OID20118	1	0.310585	0.352337	N	N	0.288929	0.172071	0.327285	0.326191	5.3038	0.150856	N	N	0.344474	0.382635	0.323025	0.230817	5.57362	0.134301	NA	NA	NA	NA	seq.19257.11	OID20118	0.460723	0.539987
P06730	IF4E	Eukaryotic translation initiation factor 4E	seq.19263.147	OID30557	1	0.751128	0.783015	Y	N	0.776852	0.668481	0.762887	0.737125	8.61444	0.0348816	N	N	0.792275	0.773032	0.799834	0.721198	5.82838	0.120265	NA	NA	NA	NA	seq.19263.147	OID30557	0.472323	0.720813
P15927	RFA2	Replication protein A 32 kDa subunit	seq.19264.6	OID30453	1	-0.0331317	0.00668183	N	N	-0.0139747	-0.013124	-0.0691609	-0.0208164	0.638269	0.887618	N	N	-0.059029	0.0208466	0.0515666	0.050305	2.36062	0.501007	NA	NA	NA	NA	seq.19264.6	OID30453	0.0296702	0.304923
Q16775	GLO2	Hydroxyacylglutathione hydrolase, mitochondrial	seq.19267.14	OID21459	1	0.568393	0.602166	Y	Y	0.681749	0.395814	0.557613	0.561481	27.0029	5.87903e-06	Y	Y	0.557202	0.618446	0.692276	0.391257	30.7179	9.74611e-07	0.571	0.72	NA	NA	seq.19267.14	OID21459	0.317174	0.537443
P54577	SYYC	Tyrosine--tRNA ligase, cytoplasmic	seq.19270.26	OID31494	1	0.521768	0.565623	Y	N	0.565076	0.382222	0.508838	0.52131	8.61734	0.0348359	N	N	0.552476	0.567189	0.602607	0.446229	7.27146	0.0637308	NA	NA	NA	NA	seq.19270.26	OID31494	0.634131	0.729396
P00390	Glutathione reductase	Glutathione reductase, mitochondrial	seq.19273.3	OID30700	1	0.42998	0.591686	Y	N	0.358377	0.594064	0.46041	0.426344	14.7773	0.00201724	Y	N	0.607937	0.619236	0.490215	0.709145	20.0423	0.00016635	NA	NA	NA	NA	seq.19273.3	OID30700	0.443128	0.600891
P09455	CRBP	Retinol-binding protein 1	seq.19279.42	OID30913	2	-0.0034265	0.0197832	N	N	0.014181	0.0115603	-0.0303653	-0.0111127	0.434204	0.93309	N	N	-0.0871222	0.0315081	0.0347866	0.100221	4.83609	0.1842	NA	NA	NA	NA	seq.19279.42	OID30913	0.169663	0.067806
O43583	DENR	Density-regulated protein	seq.19287.59	OID30493	1	0.515364	0.525914	Y	N	0.495045	0.43704	0.611267	0.502658	8.30554	0.0401016	Y	N	0.631098	0.504813	0.507913	0.503594	8.15175	0.0429775	NA	NA	NA	NA	seq.19287.59	OID30493	0.614501	0.692351
P06132	DCUP	Uroporphyrinogen decarboxylase	seq.19289.29	OID30603	1	0.598073	0.663823	N	N	0.63104	0.573892	0.596293	0.579249	2.22277	0.527478	N	N	0.667952	0.652345	0.680407	0.647615	0.926598	0.819005	NA	NA	NA	NA	seq.19289.29	OID30603	0.202662	0.302539
O14958	CASQ2	Calsequestrin-2	seq.19291.2	OID30063	1	0.00810061	0.00277953	N	N	0.00463982	-0.0370995	-0.0281144	0.0305454	1.30254	0.72853	N	N	-0.110478	0.0220563	0.0214694	0.0243083	4.14883	0.245835	NA	NA	NA	NA	seq.19291.2	OID30063	0.0188125	0.0207494
P36873	PP1G	Serine/threonine-protein phosphatase PP1-gamma catalytic subunit	seq.19295.32	OID31360	1	0.680523	0.71169	Y	N	0.721536	0.51284	0.715911	0.669148	20.046	0.000166058	Y	N	0.737112	0.70266	0.747292	0.578651	15.4537	0.00146725	NA	NA	NA	NA	seq.19295.32	OID31360	0.582052	0.660416
O14579	COPE	Coatomer subunit epsilon	seq.19310.81	OID20797	1	0.0135	0.023147	N	N	-0.00155533	0.0262331	-0.0012613	0.0119651	0.153152	0.984772	N	N	0.0113214	0.0122221	0.0385503	0.0252468	0.233812	0.971955	NA	NA	NA	NA	seq.19310.81	OID20797	-0.0131514	0.00793281
O00559	RCAS1	Receptor-binding cancer antigen expressed on SiSo cells	seq.19323.1	OID20918	2	-0.117572	0.176569	Y	N	-0.0651838	-0.105183	-0.0285385	-0.18912	8.30535	0.0401051	Y	N	0.284393	0.121827	0.233877	0.163304	8.09999	0.0439898	NA	NA	NA	NA	seq.19323.1	OID20918	-0.0592045	0.350194
Q96IU4	ABHEB	Protein ABHD14B	seq.19325.21	OID20921	1	-0.24034	0.106063	N	N	-0.259481	-0.0923126	-0.319593	-0.220787	7.66705	0.053418	N	N	0.0789076	0.126346	0.0696468	0.252336	5.92898	0.115117	0.179	0.491	NA	NA	seq.19325.21	OID20921	0.0839137	0.440524
O96017	Chk2	Serine/threonine-protein kinase Chk2	seq.19328.51	OID20054	1	0.0387236	0.14006	N	N	0.0128518	0.0320654	0.0364975	0.0410805	0.241919	0.970554	N	N	0.0246418	0.189876	0.0865056	0.115768	7.49402	0.0577124	NA	NA	0.04	NA	seq.19328.51	OID20054	0.064293	0.0593287
Q9UQB8	BAIP2	Brain-specific angiogenesis inhibitor 1-associated protein 2	seq.19331.18	OID21250	1	0.0934358	0.206999	Y	N	0.168659	0.134225	0.177658	0.0249101	9.39354	0.0244913	N	N	0.301689	0.192349	0.197219	0.127064	4.5705	0.206088	NA	NA	NA	NA	seq.19331.18	OID21250	0.137148	0.38853
P61978	hnRNP K	Heterogeneous nuclear ribonucleoprotein K	seq.19333.4	OID20051	1	0.700157	0.716725	Y	N	0.739626	0.539756	0.738942	0.683074	21.0026	0.000105144	Y	N	0.762336	0.700267	0.742706	0.583655	16.9748	0.000715241	NA	NA	0.05	NA	seq.19333.4	OID20051	0.543791	0.622381
O43570	Carbonic Anhydrase XII	Carbonic anhydrase 12	seq.19347.37	OID21344	1	0.111599	0.0780136	N	N	0.0368503	0.101831	0.15875	0.115314	2.95356	0.398841	N	N	0.115314	0.0709687	0.108507	0.0359178	1.22516	0.746976	0.235	0.119	NA	0.36	seq.19347.37	OID21344	0.143999	0.117411
Q6ZVM7	TM1L2	TOM1-like protein 2	seq.19356.20	OID31057	1	-0.116708	0.0794036	N	N	-0.143173	-0.179798	0.0327585	-0.0764524	7.49586	0.0576649	N	N	0.234953	0.11602	0.0653006	0.0195172	7.36276	0.0611916	NA	NA	NA	NA	seq.19356.20	OID31057	-0.025191	0.2188
O15232	MATN3	Matrilin-3	seq.19361.78	OID20979	1	0.61511	0.674537	N	N	0.576513	0.614141	0.605452	0.578332	0.905124	0.824191	N	N	0.675072	0.646883	0.652939	0.663724	0.599763	0.896487	0.461	0.682	0.05	NA	seq.19361.78	OID20979	0.579365	0.646609
P12004	PCNA	Proliferating cell nuclear antigen	seq.19364.163	OID31161	1	-0.012303	-0.00302915	N	N	-0.0258803	-0.0124643	0.113981	-0.0387286	5.13053	0.162485	N	N	0.114695	-0.0214232	-0.0086688	-0.0129819	4.12515	0.248264	NA	NA	NA	NA	seq.19364.163	OID31161	0.047816	0.0357157
O15382	BCAT2	Branched-chain-amino-acid aminotransferase, mitochondrial	seq.19365.11	OID30844	1	0.0274193	0.0337036	N	N	-0.040255	0.0738503	0.12606	0.0208776	5.23249	0.155544	N	N	0.10237	0.037452	-0.0322385	0.0629956	3.41196	0.332361	NA	NA	NA	NA	seq.19365.11	OID30844	0.0191235	0.00134326
Q9BW66	CINP	Cyclin-dependent kinase 2-interacting protein	seq.19383.131	OID31328	1	0.0443851	0.0577659	N	N	0.0977902	0.142076	-0.0406102	0.0149113	6.25776	0.0997215	Y	N	0.029035	0.00492814	0.141662	0.191985	10.1724	0.017156	NA	NA	NA	NA	seq.19383.131	OID31328	0.0938244	0.11595
O94760	DDAH1	N(G),N(G)-dimethylarginine dimethylaminohydrolase 1	seq.19392.6	OID21299	1	0.228686	0.3348	N	N	0.180176	0.238886	0.237591	0.213982	0.862786	0.834398	N	N	0.336049	0.339301	0.285902	0.294262	1.32355	0.723548	0.243	0.396	NA	NA	seq.19392.6	OID21299	0.201421	0.432575
P15692	L-VEGF165	Isoform L-VEGF165	seq.19437.61	OID20650	4	0.188332	0.4196	Y	N	0.209467	0.246671	0.368207	0.136753	13.7869	0.00321002	N	N	0.541482	0.406366	0.434089	0.424711	6.55288	0.0876003	0.7	0.714	0.37, 0.27	0.2, 0.52, 0.18	seq.19437.61, seq.2597.8, seq.4867.15	OID20650, OID20650, OID20650	0.721923057, 0.3914258, 0.699661673	0.733495442, 0.665695416, 0.720457318
Q9P2T1	GMPR2	GMP reductase 2	seq.19446.1	OID30623	1	0.744814	0.769448	N	N	0.75761	0.728195	0.741398	0.739031	0.798813	0.849751	N	N	0.769295	0.765159	0.772739	0.768873	0.107447	0.990929	NA	NA	NA	NA	seq.19446.1	OID30623	0.651718	0.699917
Q9H477	RBSK	Ribokinase	seq.19467.3	OID20986	1	0.00782431	0.193515	N	N	0.0210599	0.0889556	-0.0114262	0.000875121	1.64868	0.648402	Y	N	0.150026	0.253997	0.086117	0.249787	10.2989	0.0161891	0.347	0.437	NA	NA	seq.19467.3	OID20986	0.207055	0.418321
O75340	PDCD6	Programmed cell death protein 6	seq.19488.1	OID20163	1	0.275666	0.36094	N	N	0.310559	0.283805	0.373337	0.255181	3.96406	0.265371	Y	N	0.454142	0.314897	0.43629	0.371213	9.19943	0.0267536	NA	NA	NA	NA	seq.19488.1	OID20163	0.327191	0.335158
Q9BXD5	NPL	N-acetylneuraminate lyase	seq.19496.1	OID30329	1	0.0926366	0.213754	N	N	0.141034	0.171477	0.0580559	0.0655299	3.53627	0.316089	N	N	0.186623	0.201677	0.254075	0.256622	1.58421	0.662975	NA	NA	NA	NA	seq.19496.1	OID30329	0.244496	0.342692
P23919	KTHY	Thymidylate kinase	seq.19504.22	OID30308	1	0.827593	0.845941	Y	N	0.857105	0.773298	0.822043	0.814101	10.8698	0.012451	Y	N	0.842051	0.836638	0.868401	0.787947	10.4621	0.0150199	NA	NA	NA	NA	seq.19504.22	OID30308	0.704505	0.78848
Q6PH85	DCNL2	DCN1-like protein 2	seq.19511.8	OID31231	1	0.00329817	0.000534614	N	N	-0.00878824	-0.0126082	0.00202061	0.0132615	0.21476	0.975172	N	N	-0.0845926	0.0467062	-0.0370668	-0.0373757	4.92403	0.177446	NA	NA	NA	NA	seq.19511.8	OID31231	0.00119915	0.023297
Q99497	PARK7	Protein DJ-1	seq.19523.215	OID21160	1	0.805906	0.822215	N	N	0.81948	0.800202	0.83817	0.78803	5.72013	0.12605	N	N	0.856854	0.804062	0.832577	0.813863	7.06071	0.0699877	0.772	0.797	-0.06	NA	seq.19523.215, seq.19545.145	OID21160, OID21160	0.764057224, 0.165039001	0.795299821, 0.277794356
Q99497	Oxidized PARK7	Oxidized Protein deglycase DJ-1	seq.19545.145	OID21160	3	-0.253572	0.0873401	Y	N	-0.364813	-0.0886579	-0.232021	-0.209316	14.764	0.00202987	N	N	0.0697161	0.133544	0.0290511	0.169975	4.67194	0.197457	0.338	0.357	-0.06	NA	seq.19523.215, seq.19545.145	OID21160, OID21160	0.764057224, 0.165039001	0.795299821, 0.277794356
P17927	Complement receptor type 1	Complement receptor type 1	seq.19556.12	OID30697	1	0.770238	0.815584	N	N	0.769959	0.796438	0.773508	0.754801	2.1861	0.534692	N	N	0.805055	0.800574	0.814775	0.839263	2.72759	0.435559	NA	NA	NA	NA	seq.19556.12	OID30697	0.691692	0.752571
Q86Z14	KLOTB	Beta-klotho	seq.19557.3	OID20888	1	0.330122	0.319386	N	N	0.31321	0.319199	0.237252	0.31747	1.73736	0.628659	N	N	0.212699	0.318425	0.329391	0.288981	3.26945	0.351917	0.297	0.278	NA	NA	seq.19557.3	OID20888	0.300374	0.270507
Q9HCM2	PLXA4	Plexin-A4	seq.19560.23	OID20597	1	0.491562	0.589241	Y	N	0.548375	0.259792	0.562303	0.467452	22.6017	4.88866e-05	Y	N	0.665342	0.582646	0.626737	0.385126	22.5928	4.90968e-05	0.504	0.633	NA	NA	seq.19560.23	OID20597	0.0870701	0.152522
Q96RU2	UBP28	Ubiquitin carboxyl-terminal hydrolase 28	seq.19562.8	OID31084	1	-0.0800448	0.150665	N	N	-0.0808112	0.0392417	-0.127934	-0.0996764	4.25135	0.235571	N	N	0.032594	0.17082	0.20033	0.151553	5.39476	0.14507	NA	NA	NA	NA	seq.19562.8	OID31084	-0.0275977	0.152063
Q9BYH1	SEZ6L	Seizure 6-like protein	seq.19563.3	OID21488	1	0.661577	0.715043	N	N	0.581626	0.659937	0.652129	0.667296	6.14596	0.104721	N	N	0.712355	0.707223	0.679963	0.671013	1.63538	0.651393	0.748	0.781	NA	NA	seq.19563.3	OID21488	0.585809	0.612847
P00533	EGFRvIII	Epidermal growth factor receptor variant III	seq.19567.1	OID20319	2	-0.00684317	0.026654	N	N	0.0394167	0.0282258	-0.0737019	-0.0193251	2.58812	0.459577	N	N	0.00719752	-0.00422144	0.082173	0.00333908	2.34861	0.503272	-0.032	0.022	0.5, 0.04	0.53, -0.08	seq.19567.1, seq.2677.1	OID20319, OID20319	0.028443775, 0.458813607	0.030149825, 0.509059791
P40933	IL-15	Interleukin-15	seq.19568.17	OID20562	1	-7.15953e-06	0.0388165	N	N	0.0939357	-0.0886727	0.00344096	0.00450728	5.33462	0.148872	N	N	-0.00736779	0.0279883	0.101668	-0.0529704	4.21924	0.238742	0.057	0.105	NA	NA	seq.19568.17	OID20562	-0.22543	-0.206818
O60496	DOK2	Docking protein 2	seq.19578.19	OID20138	1	0.78747	0.808158	N	N	0.804762	0.721879	0.805609	0.780018	7.15918	0.0669935	N	N	0.825393	0.802049	0.825445	0.749286	7.25109	0.064311	NA	NA	NA	NA	seq.14246.50, seq.19578.19	OID20138, OID20138	0.676080566, 0.597792817	0.726663939, 0.716022391
P59665	HNP-1	Neutrophil defensin 1	seq.19579.5	OID20344	2	0.0433852	0.150135	N	N	0.0372214	0.109909	0.153639	0.00455973	5.83059	0.12015	N	N	0.19806	0.158097	0.189952	0.210798	0.842822	0.8392	0.157	0.222	NA	0.19	seq.19579.5	OID20344	0.0686266	0.130848
P31371	FGF9	Fibroblast growth factor 9	seq.19584.33	OID31193	1	0.128787	0.112213	N	N	0.166244	0.0888958	0.113963	0.129	1.06634	0.785206	Y	N	-0.0493627	0.154194	0.153335	0.118471	9.55772	0.0227252	NA	NA	NA	NA	seq.19584.33	OID31193	0.168954	0.0990695
P35247	SP-D	Pulmonary surfactant-associated protein D	seq.19590.46	OID20214	1	0.681148	0.686495	Y	N	0.734961	0.559545	0.725014	0.662416	17.2769	0.000619865	Y	N	0.722496	0.667878	0.745218	0.561204	18.5897	0.000332338	0.725	0.741	-0.03	0.75	seq.19590.46	OID20214	0.677503	0.698499
P20061	Holo-TC I	Transcobalamin-1	seq.19614.8	OID30687	2	0.398768	0.413655	Y	N	0.530769	0.379592	0.328357	0.31172	22.5089	5.11114e-05	Y	Y	0.333388	0.319875	0.546525	0.407748	25.0216	1.52807e-05	NA	NA	NA	NA	seq.19614.8	OID30687	0.334694	0.334461
Q9H0P0	5NT3	Cytosolic 5'-nucleotidase 3A	seq.19615.213	OID20553	1	0.581157	0.626427	N	N	0.540944	0.537089	0.623333	0.589086	3.71733	0.293649	N	N	0.676045	0.637548	0.58809	0.584967	4.95002	0.175494	NA	NA	NA	NA	seq.19615.213	OID20553	0.42545	0.526523
Q9BUP0	EFHD1	EF-hand domain-containing protein D1	seq.19616.100	OID31044	1	0.0424171	0.06485	N	N	0.0269213	0.0650964	0.085128	0.010671	1.46756	0.689778	N	N	0.0267288	0.067537	0.119065	0.00938024	2.40916	0.491932	NA	NA	NA	NA	seq.19616.100	OID31044	-0.181476	-0.0163789
Q14914	LTB4DH	Prostaglandin reductase 1	seq.19617.5	OID30297	1	0.606268	0.578954	Y	N	0.562445	0.673114	0.739302	0.586316	21.675	7.62163e-05	Y	Y	0.740343	0.543956	0.539144	0.648168	29.2918	1.94451e-06	NA	NA	NA	NA	seq.19617.5	OID30297	0.518234	0.48732
O76070	g-Synuclein	Gamma-synuclein	seq.19630.2	OID20971	1	0.051084	0.154098	N	N	0.0966943	-0.0415943	0.12906	0.0422483	4.5688	0.206235	N	N	0.201145	0.165812	0.188773	0.0253137	5.1341	0.162237	NA	NA	NA	NA	NA	NA	NA	NA
P06850	CRH	Corticoliberin	seq.19637.9	OID21257	1	0.0678599	0.0605265	N	N	0.0232267	0.0526148	0.0924841	0.0737215	1.0657	0.78536	N	N	0.0715664	0.0580418	0.0335678	0.0646462	0.306932	0.958719	0.25	0.207	NA	0.17, -0.04	seq.19637.9, seq.5614.44	OID21257, OID21257	0.185564973, 0.006144863	0.149984022, -0.033726145
P01270	Parathyroid Hormone1-34	Parathyroid Hormone1-34	seq.19640.2	OID30963	2	0.0603309	0.154232	N	N	0.112862	0.0180633	0.0306278	0.0420908	2.11168	0.549554	N	N	0.0618829	0.175427	0.13546	0.083884	3.68661	0.297353	NA	NA	NA	NA	seq.19640.2, seq.5954.62	OID30963, OID30963	0.157883956, 0.589020198	0.220949921, 0.627299165
Q6UX27	VSTM1	V-set and transmembrane domain-containing protein 1	seq.19743.12	OID20851	2	0.289628	0.262927	Y	N	0.184933	0.432332	0.418523	0.326009	16.6394	0.000838274	Y	N	0.401263	0.290792	0.175126	0.387361	13.5744	0.00354553	NA	NA	NA	NA	NA	NA	NA	NA
P00813	ADA	Adenosine deaminase	seq.19751.21	OID20645	1	-0.0939753	0.0561161	N	N	-0.116038	-0.22308	-0.0867794	-0.090253	3.62208	0.30527	N	N	0.0338037	0.0637408	0.0313911	-0.0914865	4.43867	0.217827	NA	NA	NA	NA	NA	NA	NA	NA
Q6UB28	AMP1D	Methionine aminopeptidase 1D, mitochondrial	seq.19752.197	OID20519	1	-0.29007	0.162001	Y	N	-0.30025	-0.105923	-0.334532	-0.28488	8.67718	0.0339057	N	N	0.11019	0.187067	0.181889	0.267194	3.32604	0.344035	NA	NA	NA	NA	NA	NA	NA	NA
Q9UII2	ATIF1	ATPase inhibitor, mitochondrial	seq.19755.38	OID20760	1	0.690233	0.70631	Y	N	0.743649	0.599825	0.635028	0.683042	13.2525	0.00412119	N	N	0.664325	0.705589	0.74154	0.637864	7.49434	0.057704	NA	NA	NA	NA	NA	NA	NA	NA
P15085	CBPA1	Carboxypeptidase A1	seq.19760.26	OID20280	1	0.622356	0.571403	Y	N	0.652325	0.556782	0.528904	0.647848	10.5197	0.0146279	N	N	0.50743	0.587014	0.602872	0.507973	5.58739	0.133504	NA	NA	NA	NA	NA	NA	NA	NA
Q6UXB4	CLC4G	C-type lectin domain family 4 member G	seq.19765.17	OID20590	2	-0.07385	0.0859291	N	N	-0.185108	-0.0673106	-0.0117664	-0.0436664	7.52108	0.0570192	N	N	0.14081	0.114023	0.0247545	0.0957888	3.10669	0.375466	NA	NA	NA	NA	seq.10781.19	OID20590	0.12769	0.172256
P24864	Cyclin E	G1/S-specific cyclin-E1	seq.19767.20	OID30456	1	-0.01218	0.0331637	N	N	-0.0649006	-0.0820695	-0.0298904	-0.00654092	1.65718	0.646496	N	N	-0.019255	0.0332385	0.0692759	0.00837018	1.45604	0.692452	NA	NA	NA	NA	NA	NA	NA	NA
P04080	Cystatin B	Cystatin B	seq.19768.13	OID20294	1	0.630522	0.667327	Y	N	0.642876	0.689247	0.631413	0.579108	7.85732	0.0490543	N	N	0.660325	0.638787	0.682759	0.697225	3.09682	0.376938	NA	NA	NA	NA	NA	NA	NA	NA
Q14210	LY6D	Lymphocyte antigen 6D	seq.19784.16	OID20708	1	0.0119559	0.0685667	N	N	-0.00913877	-0.00018805	0.0589646	-0.02395	1.47206	0.688734	N	N	0.0229707	0.0654615	0.117429	0.00905855	2.42098	0.489741	NA	NA	NA	NA	NA	NA	NA	NA
Q16819	MEP1A	Meprin A subunit alpha	seq.19786.26	OID31459	1	0.502797	0.464856	N	N	0.550474	0.567464	0.491203	0.468237	5.75279	0.124277	N	N	0.460498	0.436078	0.527379	0.483296	4.3417	0.226852	NA	NA	NA	NA	NA	NA	NA	NA
Q12866	MER	Proto-oncogene tyrosine-protein kinase MER	seq.19787.14	OID20657	2	0.138681	0.175119	N	N	0.198957	0.0708705	0.147661	0.106088	3.6453	0.302401	Y	N	0.100946	0.170825	0.278961	0.0931466	8.40757	0.0382983	NA	NA	NA	NA	NA	NA	NA	NA
O00559	RCAS1	Receptor-binding cancer antigen expressed on SiSo cells	seq.19802.22	OID20918	1	0.653908	0.698749	Y	N	0.72188	0.631163	0.698721	0.597296	17.495	0.000558962	Y	N	0.754589	0.660718	0.73837	0.677011	11.8399	0.00795219	NA	NA	NA	NA	seq.19323.1	OID20918	-0.0592045	0.350194
P50120	RET2	Retinol-binding protein 2	seq.19803.34	OID21365	1	-0.0441602	-0.0199494	N	N	-0.0493342	0.0234337	-0.134923	-0.0164688	3.96591	0.265168	N	N	-0.127053	0.0226896	-0.0438767	0.0168818	5.40827	0.144229	NA	NA	NA	NA	NA	NA	NA	NA
Q96LB8	PGRP-I-beta	Peptidoglycan recognition protein I-beta	seq.19821.10	OID30101	1	-4.15792e-05	6.21333e-05	N	N	-0.0219666	0.0353333	-0.0728197	0.0127803	2.05772	0.560514	N	N	-0.0797352	0.013945	0.00482568	-0.0576969	2.49086	0.476945	NA	NA	NA	NA	NA	NA	NA	NA
Q96EB6	SIR1	NAD-dependent protein deacetylase sirtuin-1	seq.19823.75	OID30439	1	-0.0637429	0.013468	N	N	-0.0881434	-0.00139042	0.0255558	-0.0712396	3.1592	0.367725	N	N	0.0441671	0.00577814	0.0445567	0.0757406	1.17513	0.758974	NA	NA	NA	NA	NA	NA	NA	NA
Q9ULW2	Frizzled-10:FZ	Frizzled-10:Frizzled domain	seq.20056.7	OID30931	1	-0.00618603	0.000276506	N	N	0.0192318	0.0344043	-0.0124835	-0.0204712	0.844926	0.838694	N	N	0.0218686	-0.026897	0.037156	0.0504407	1.95329	0.582157	NA	NA	NA	NA	seq.11647.6	OID30931	0.00456905	0.0396502
P02751	FN1.2	Fibronectin-1 Fragment 2	seq.20064.24	OID30787	1	0.212437	0.210694	N	N	0.236882	0.263982	0.137495	0.203566	2.66967	0.445407	N	N	0.132726	0.19728	0.245138	0.269591	3.4073	0.332986	NA	NA	NA, NA, NA	NA	seq.3434.34, seq.3435.53, seq.4131.72	OID30787, OID30787, OID30787	0.087609744, 0.080773212, 0.122069151	0.152388597, 0.181121649, 0.169370048
O00221	IKB-epsilon	I-kappa-B-epsilon	seq.20071.53	OID21212	1	-0.0926305	-0.0154728	N	N	-0.0864554	-0.0545887	-0.079019	-0.101736	0.457997	0.928017	N	N	-0.0202981	-0.0146192	-0.0165282	0.00637866	0.1079	0.990873	NA	NA	NA	NA	NA	NA	NA	NA
P41218	MNDA	Myeloid cell nuclear differentiation antigen	seq.20076.7	OID20156	1	0.7819	0.795088	Y	N	0.79271	0.701001	0.834435	0.782109	14.0824	0.00279505	Y	N	0.837664	0.801214	0.799306	0.720872	11.7265	0.00838108	NA	NA	NA	NA	NA	NA	NA	NA
P14649	MYL6B	Myosin light chain 6B	seq.20078.6	OID30936	2	0.00453928	0.00648718	N	N	-0.00134099	-0.00483075	-0.0318008	0.0339442	1.11873	0.772555	N	N	0.00387657	0.0176138	-0.0175612	0.00803809	0.37042	0.946283	NA	NA	NA	NA	seq.14227.21	OID30936	0.105435	0.108612
P20340	RAB6A	Ras-related protein Rab-6A	seq.20083.1	OID20608	1	0.100848	0.100918	Y	N	0.0253167	0.265235	0.316683	0.0863014	21.8644	6.96089e-05	Y	N	0.31358	0.0838746	0.030523	0.272587	21.7606	7.31578e-05	NA	NA	NA	NA	NA	NA	NA	NA
P20827	Ephrin-A1	Ephrin-A1	seq.20091.138	OID21125	1	0.651126	0.717585	Y	N	0.646872	0.540403	0.65607	0.574641	8.10778	0.043836	Y	N	0.754219	0.656968	0.725847	0.587057	17.1959	0.000644109	NA	NA	NA	NA	NA	NA	NA	NA
P19320	VCAM-1	Vascular cell adhesion protein 1	seq.20093.9	OID20396	1	0.688616	0.728886	N	N	0.645683	0.655986	0.629862	0.677862	1.98476	0.575576	N	N	0.66106	0.723403	0.708028	0.67372	4.0112	0.260257	NA	NA	0.68	0.68	seq.2967.8	OID20396	0.511222	0.487963
P12829	MYL4	Myosin light polypeptide 4	seq.20107.11	OID30245	1	-0.119791	-0.0185511	N	N	-0.170625	-0.0629673	-0.0677002	-0.118333	2.66392	0.446393	N	N	-0.0208667	0.0102893	-0.122529	0.0730258	7.46612	0.0584354	NA	NA	NA	NA	NA	NA	NA	NA
Q9H910	HN1L	Hematological and neurological expressed 1-like protein	seq.20110.25	OID31520	1	0.561456	0.617745	Y	N	0.524798	0.508714	0.675265	0.546055	12.2589	0.00654692	Y	N	0.705282	0.619644	0.582656	0.572027	9.14909	0.0273729	NA	NA	NA	NA	NA	NA	NA	NA
Q86WK6	AMGO1:ECD	Amphoterin-induced protein 1:Extracellular domain	seq.20120.101	OID30881	1	0.0250143	0.0191574	N	N	0.0409861	-0.0291719	0.056164	0.0280065	1.03743	0.792197	N	N	0.0563066	0.0241938	0.0087685	-0.0155184	0.721086	0.868233	NA	NA	NA	NA	seq.9979.13	OID30881	-0.0229381	-0.0160495
P14136	GFAP	Glial fibrillary acidic protein	seq.20126.19	OID21247	1	0.00173196	0.014191	N	N	0.00884642	0.0415388	-0.0254334	0.0097038	0.566129	0.904141	N	N	-0.0207064	0.0291498	0.0351311	0.0466015	0.739986	0.863761	NA	NA	0.12	NA	seq.3034.1	OID21247	-0.0739294	-0.0296627
Q9BQS7	HEPH	Hephaestin	seq.20127.102	OID30337	1	0.010237	0.0577514	N	N	0.0172352	-0.122014	-0.0337559	0.0422843	5.49355	0.139025	N	N	0.0479987	0.05633	0.0826167	-0.0628351	3.39639	0.334451	NA	NA	NA	NA	NA	NA	NA	NA
P43357	MAGE-3	Melanoma-associated antigen 3	seq.20133.1	OID31331	1	0.0042004	0.00327574	N	N	0.10517	-0.0509787	-0.0613416	-0.00808517	6.49342	0.0899224	N	N	-0.0338845	-0.00710653	0.0432867	0.0210478	1.24911	0.741251	NA	NA	NA	NA	seq.12576.21	OID31331	-0.0282725	-0.0313887
Q9UEW3	MARCO	Macrophage receptor MARCO	seq.20134.27	OID20210	1	0.332752	0.403215	Y	N	0.353158	0.292884	0.136858	0.374434	14.5982	0.00219424	Y	N	0.223056	0.435602	0.380487	0.399711	12.2844	0.00646975	NA	NA	NA	0.02	seq.9003.99	OID20210	0.0478111	0.106942
P13591	NCAM1	Neural cell adhesion molecule 1	seq.20161.41	OID20354	2	0.575913	0.673015	N	N	0.61968	0.628465	0.59399	0.559147	3.78053	0.286159	N	N	0.693049	0.65724	0.727079	0.628622	7.33087	0.0620673	NA	NA	0.68	0.62	seq.4498.62	OID20354	0.477972	0.53561
Q9UKX5	ITA11	Integrin alpha-11	seq.20181.17	OID20581	1	-0.0656373	-0.0685531	N	N	-0.055304	-0.0494717	-0.0645756	-0.0604249	0.0368598	0.998139	N	N	-0.162384	-0.0944344	-0.0433985	-0.0577026	2.69232	0.441533	NA	NA	NA	NA	NA	NA	NA	NA
P62760	VISL1	Visinin-like protein 1	seq.20197.14	OID31105	1	0.180966	0.183351	N	N	0.183779	0.273912	0.215838	0.170096	2.39266	0.495003	N	N	0.260332	0.158685	0.166692	0.238686	3.28771	0.349357	NA	NA	NA	NA	seq.13522.20	OID31105	0.0735843	0.110069
P09871	C1s	Complement C1s subcomponent	seq.20203.45	OID30731	1	0.454351	0.494842	Y	Y	0.47317	0.429799	0.654074	0.405098	26.8901	6.20824e-06	Y	N	0.639655	0.461109	0.512762	0.459006	15.0434	0.00177995	NA	NA	NA	NA	seq.8840.61	OID30731	0.396692	0.459042
Q03252	Lamin-B2	Lamin-B2	seq.20217.26	OID31109	1	0.533123	0.570664	N	N	0.526717	0.518122	0.450378	0.54547	3.42656	0.330413	N	N	0.502953	0.587576	0.566751	0.535728	3.54374	0.315133	NA	NA	NA	NA	NA	NA	NA	NA
P08473	Neprilysin	Neprilysin	seq.20219.25	OID21307	1	-0.0506482	-0.00521632	N	N	-0.0443998	-0.0381496	-0.0731148	-0.00821288	1.06262	0.786104	N	N	0.00425895	0.0495108	-0.0366106	-0.0798262	4.2522	0.235487	NA	NA	NA	NA	NA	NA	NA	NA
O00161	SNP23	Synaptosomal-associated protein 23	seq.20241.9	OID20218	1	-0.0923432	0.167988	N	N	-0.107577	-0.0699994	-0.0260298	-0.118561	2.05541	0.560987	N	N	0.225471	0.163792	0.147016	0.112509	1.87747	0.598223	NA	NA	NA	NA	NA	NA	NA	NA
P07311	ACYP1	Acylphosphatase-1	seq.20370.6	OID30642	1	0.735045	0.778446	N	N	0.769066	0.699843	0.763508	0.718149	6.23778	0.100598	N	N	0.79223	0.774251	0.788632	0.757031	1.38358	0.709388	NA	NA	NA	NA	NA	NA	NA	NA
Q9NWU2	GID8	Glucose-induced degradation protein 8 homolog	seq.20373.141	OID31041	1	0.000352064	0.053208	N	N	0.00107476	0.0376074	-0.0345984	0.00944989	0.697385	0.873819	N	N	0.00263434	0.0578964	0.0517128	0.0880136	1.00046	0.80114	NA	NA	NA	NA	NA	NA	NA	NA
Q9NQ48	LZTL1	Leucine zipper transcription factor-like protein 1	seq.20378.110	OID30637	1	0.730892	0.745016	Y	N	0.752727	0.681513	0.771042	0.704278	8.00173	0.045976	N	N	0.786103	0.724643	0.757732	0.696268	6.95244	0.0734294	NA	NA	NA	NA	NA	NA	NA	NA
Q5TA50	CPTP	Ceramide-1-phosphate transfer protein	seq.20385.21	OID30106	1	0.0193532	0.0155068	N	N	0.0970742	-0.0365055	0.0126446	-0.0105639	4.17733	0.242942	N	N	-0.00823835	-0.00990426	0.104006	-0.0137236	4.39599	0.221758	NA	NA	NA	NA	NA	NA	NA	NA
Q6GMV3	PTRD1	Putative peptidyl-tRNA hydrolase PTRHD1	seq.20386.15	OID30659	1	0.804788	0.820999	Y	N	0.813872	0.727632	0.829213	0.801756	9.74524	0.0208605	Y	N	0.846058	0.816417	0.831342	0.745881	11.0445	0.0114874	NA	NA	NA	NA	NA	NA	NA	NA
Q15388	TOM20	Mitochondrial import receptor subunit TOM20 homolog	seq.20408.11	OID30353	1	0.659034	0.659891	N	N	0.654676	0.570986	0.701168	0.655927	6.14679	0.104683	N	N	0.699517	0.656302	0.662776	0.573674	5.85908	0.118671	NA	NA	NA	NA	NA	NA	NA	NA
Q03014	HHEX	Hematopoietically-expressed homeobox protein HHEX	seq.20425.12	OID31107	1	-0.134823	0.183654	Y	N	-0.220747	-0.16017	-0.0961308	-0.0556723	9.09635	0.0280369	N	N	0.209369	0.259433	0.121618	0.152091	6.97656	0.0726487	NA	NA	NA	NA	NA	NA	NA	NA
Q8TCT1	PHOP1	Phosphoethanolamine/phosphocholine phosphatase	seq.20428.5	OID20922	1	0.0403123	0.039753	Y	N	-0.0318506	-0.0524717	0.171594	0.0345794	8.86541	0.0311349	N	N	0.10411	0.0744174	-0.0455071	-0.0516202	7.32737	0.0621638	NA	NA	NA	NA	NA	NA	NA	NA
P23582	Natriuretic Peptide C-Type	C-type natriuretic peptide	seq.20430.8	OID20568	1	-0.0387241	0.0334894	N	N	-0.014702	0.0288624	-0.0559415	-0.0634047	1.94698	0.583484	N	N	0.081688	0.0358035	0.0397571	0.0930295	0.939151	0.815971	NA	NA	NA	NA	NA	NA	NA	NA
O94903	PROSC	Proline synthase co-transcribed bacterial homolog protein	seq.20439.14	OID20144	1	0.835891	0.853309	Y	N	0.868225	0.786886	0.851627	0.813072	15.8577	0.00121273	Y	N	0.864271	0.836328	0.876875	0.807664	11.8822	0.00779793	NA	NA	NA	NA	NA	NA	NA	NA
Q9BW30	TPPP3	Tubulin polymerization-promoting protein family member 3	seq.20444.12	OID20842	1	0.374433	0.434266	N	N	0.423551	0.436437	0.353051	0.312786	7.01696	0.0713593	Y	N	0.409304	0.372351	0.489203	0.511313	9.4375	0.0240056	NA	NA	NA	NA	NA	NA	NA	NA
P61218	RPAB2	DNA-directed RNA polymerases I, II, and III subunit RPABC2	seq.20448.7	OID21283	1	-0.0810571	0.244311	N	N	-0.0795578	-0.075449	-0.052334	-0.0886754	0.28768	0.962329	N	N	0.145014	0.29224	0.26748	0.202172	5.90934	0.116106	NA	NA	NA	NA	NA	NA	NA	NA
Q8IY31	IFT20	Intraflagellar transport protein 20 homolog	seq.20460.22	OID30962	1	-0.0362474	0.0793179	Y	N	0.0813498	0.0889146	-0.0377863	-0.0687348	9.34685	0.0250177	Y	N	0.063604	0.0547807	0.210514	0.163755	8.79859	0.0320921	NA	NA	NA	NA	NA	NA	NA	NA
Q9P2X3	IMPCT	Protein IMPACT	seq.20463.315	OID31112	1	0.709026	0.728514	Y	N	0.748207	0.583688	0.718985	0.700815	13.8913	0.00305689	Y	N	0.731148	0.731753	0.752519	0.611591	11.5726	0.00900021	NA	NA	NA	NA	NA	NA	NA	NA
Q9Y624	JAM-A	Junctional adhesion molecule A	seq.20511.3	OID21151	1	0.421699	0.522388	N	N	0.415997	0.34364	0.429278	0.423422	1.75849	0.62401	N	N	0.510667	0.537299	0.509682	0.470504	1.64928	0.648268	NA	NA	NA	NA	NA	NA	NA	NA
P43121	MUC18	Melanoma-associated antigen MUC18	seq.20512.2	OID20343	1	0.728697	0.715825	N	N	0.719997	0.711779	0.756847	0.720798	1.65952	0.64597	N	N	0.746959	0.703286	0.71111	0.680461	2.61581	0.454725	NA	NA	NA	NA	NA	NA	NA	NA
Q13145	BAMBI:ECD	BMP and activin membrane-bound inhibitor homolog:Extracellular domain	seq.20514.8	OID21267	3	-0.0454773	-0.0125263	N	N	-0.144702	0.00158454	-0.0919052	-0.076859	3.39008	0.3353	N	N	-0.0483853	-0.0407632	-0.0862495	0.0453334	2.6149	0.454883	NA	NA	NA	0.62	seq.8811.24	OID21267	0.34806	0.279412
Q9NY72	SCN3B	Sodium channel subunit beta-3	seq.20516.11	OID30804	1	0.0425144	0.0279954	N	N	0.0502232	-0.0379069	-0.0501979	0.0855076	5.6058	0.132446	N	N	-0.0924764	0.0767401	0.0207981	-0.0183742	6.74428	0.0805109	NA	NA	NA	NA	NA	NA	NA	NA
Q14126	Desmoglein-2	Desmoglein-2	seq.20517.1	OID21113	2	0.58648	0.65816	N	N	0.597698	0.587477	0.586648	0.570467	0.559451	0.905649	N	N	0.629051	0.657054	0.668948	0.626742	1.29841	0.729511	NA	NA	NA	NA	seq.9484.75	OID21113	0.515297	0.514355
P30203	CD6	CD6	seq.20519.7	OID20649	1	-0.0535567	0.0990677	N	N	-0.0307913	-0.0167645	-0.0612897	-0.0611017	0.561884	0.9051	N	N	0.00830056	0.11918	0.0794399	0.156392	3.60605	0.307266	NA	NA	NA	NA	NA	NA	NA	NA
Q92520	FAM3C	Protein FAM3C	seq.20520.14	OID20233	1	0.0297217	0.079172	Y	N	-0.0545824	0.172151	0.0807246	0.0104546	8.87274	0.0310316	N	N	0.06713	0.0884681	0.0645248	0.183074	2.48393	0.478203	NA	NA	NA	NA	NA	NA	NA	NA
P10747	CD28	CD28	seq.20521.83	OID21265	1	0.336823	0.404399	N	N	0.364763	0.405885	0.321196	0.304567	3.18139	0.364494	N	N	0.357787	0.383162	0.460102	0.445308	4.01956	0.25936	NA	NA	NA	NA	NA	NA	NA	NA
P13667	PDIA4	Protein disulfide-isomerase A4	seq.20525.200	OID30375	1	0.758462	0.771907	N	N	0.775456	0.731305	0.791459	0.734483	5.9111	0.116016	N	N	0.7985	0.750124	0.791105	0.739925	5.83337	0.120005	NA	NA	NA	NA	seq.7146.16	OID30375	-0.153768	0.342571
Q8WTV0	SCRB1	Scavenger receptor class B member 1	seq.20534.6	OID20805	1	-0.0107805	0.00738434	N	N	-0.0411928	0.080968	0.0594973	0.0212065	2.91634	0.404705	N	N	0.0693789	0.0485352	-0.02959	0.0795637	2.76467	0.429348	NA	NA	NA	NA	NA	NA	NA	NA
Q96AP7	ESAM	Endothelial cell-selective adhesion molecule	seq.20536.11	OID20270	3	0.584917	0.601023	N	N	0.607801	0.553364	0.522488	0.532766	4.25695	0.235022	N	N	0.547859	0.57132	0.631326	0.541805	4.34398	0.226636	NA	NA	0.69	NA	seq.7841.84	OID20270	0.348823	0.518656
Q13002	GRIK2	Glutamate receptor ionotropic, kainate 2	seq.20544.103	OID30977	1	-0.0238123	0.0119411	N	N	-0.0215803	-0.0639476	0.00735707	-0.0244729	0.637613	0.88777	N	N	0.00658677	0.00723996	-0.0041724	0.0548344	0.557177	0.906162	NA	NA	NA	NA	NA	NA	NA	NA
P55082	MFAP3	Microfibril-associated glycoprotein 3	seq.20545.17	OID20057	1	0.0362778	0.0292931	N	N	0.013229	-0.0679346	0.118554	0.0449789	4.65955	0.198493	N	N	0.0856953	0.0531084	-0.0319725	-0.0345952	3.97311	0.264383	NA	NA	NA	NA	NA	NA	NA	NA
Q96FE7	P3IP1	Phosphoinositide-3-kinase-interacting protein 1	seq.20553.2	OID21094	1	-0.0524577	-0.0145592	N	N	-0.106362	-0.0195985	-0.0454169	-0.0331129	1.88752	0.596077	N	N	-0.0467637	0.0523643	0.0255635	0.0204998	2.10607	0.550686	NA	NA	NA	NA	NA	NA	NA	NA
Q12918	KLRB1	Killer cell lectin-like receptor subfamily B member 1	seq.20562.78	OID20629	2	-0.0716041	-0.0322124	N	N	-0.037097	0.0807391	-0.000276878	0.0319662	2.49987	0.475314	N	N	0.00270196	0.0895718	-0.00866926	0.115947	4.5019	0.21212	NA	NA	NA	NA	seq.10809.14	OID20629	0.31083	0.286105
P04216	THY1	Thy-1 membrane glycoprotein	seq.20564.53	OID21050	1	0.583955	0.645412	N	N	0.624386	0.568228	0.596749	0.549437	4.21465	0.2392	N	N	0.649738	0.62723	0.68221	0.602474	3.80538	0.283261	NA	NA	NA	NA	NA	NA	NA	NA
Q6UX27	VSTM1	V-set and transmembrane domain-containing protein 1	seq.20570.18	OID20851	1	0.663272	0.686678	N	N	0.636961	0.70479	0.6638	0.640037	2.98776	0.393516	N	N	0.6937	0.665872	0.655817	0.724436	3.25998	0.353251	NA	NA	NA	NA	NA	NA	NA	NA
Q12866	MER	Proto-oncogene tyrosine-protein kinase MER	seq.20572.6	OID20657	1	0.171197	0.190445	N	N	0.181144	0.0116394	0.215041	0.166187	6.24451	0.100302	N	N	0.173958	0.198901	0.228069	0.0528244	5.2244	0.156084	NA	NA	NA	NA	NA	NA	NA	NA
Q9H461	FZD8	Frizzled-8	seq.20577.5	OID30818	1	0.114633	0.133576	N	N	0.0530342	0.0571221	0.0646487	0.120852	1.93946	0.585067	N	N	0.0806306	0.137826	0.0838655	0.0728821	1.60981	0.657168	NA	NA	NA	NA	NA	NA	NA	NA
P20916	MAG	Myelin-associated glycoprotein	seq.20579.50	OID30967	1	0.0267578	0.0141999	N	N	0.0289864	0.0238371	-0.0270968	0.0381501	0.913303	0.822216	N	N	-0.0431392	0.0431837	0.00217033	-0.00663791	1.85044	0.604021	NA	NA	NA	NA	NA	NA	NA	NA
P43220	GLP1R:ECD	Glucagon-like peptide 1 receptor:Extracellular domain	seq.20581.42	OID30809	2	-0.0244425	-0.00182646	N	N	0.0126606	-0.102852	0.0107516	-0.0384667	2.52416	0.470941	N	N	-0.022143	-0.00570013	0.0490068	-0.0588526	1.99878	0.57266	NA	NA	NA	NA	seq.13085.18	OID30809	0.0102328	-0.00471491
Q15223	nectin-1 gamma:ECD	Nectin-1, isoform gamma:Extracellular domain	seq.20584.4	OID30545	1	0.198108	0.229019	N	N	0.0968902	0.145355	0.173059	0.245946	7.74178	0.051661	N	N	0.19852	0.260544	0.191246	0.154148	3.31158	0.346034	NA	NA	NA	NA	seq.8803.61	OID30545	0.00125283	0.0695366
Q6UXG3	CLM9	CMRF35-like molecule 9	seq.20585.5	OID21130	1	0.761032	0.784537	N	N	0.782581	0.69427	0.777874	0.755212	6.4519	0.0915788	Y	N	0.781681	0.77527	0.817213	0.719149	9.19578	0.026798	NA	NA	NA	NA	NA	NA	NA	NA
Q6UXG3	CLM9	CMRF35-like molecule 9	seq.20585.9	OID21130	2	-0.0231522	-0.0102997	N	N	-0.10073	0.0741666	0.00813634	-0.0157128	5.12509	0.162864	N	N	-0.0610205	-0.00982022	-0.0330467	0.103709	3.91224	0.271097	NA	NA	NA	NA	NA	NA	NA	NA
Q9P232	CNTN3	Contactin-3	seq.20586.18	OID21092	1	0.791812	0.82385	N	N	0.78722	0.786777	0.813667	0.76673	3.56073	0.312971	N	N	0.847543	0.802827	0.821263	0.782378	6.09009	0.107309	NA	NA	NA	NA	NA	NA	NA	NA
P55283	CADH4	Cadherin-4	seq.20589.5	OID30875	1	-0.0191764	-0.0069252	N	N	-0.018154	0.0934398	-0.0690912	-0.0209707	3.53263	0.316555	N	N	-0.0634646	-0.00929655	0.0046525	0.0926866	3.16244	0.367251	NA	NA	NA	NA	NA	NA	NA	NA
P01303	NPY	Neuropeptide Y	seq.20590.13	OID21388	1	0.188237	0.348547	Y	N	0.172849	0.333037	0.154773	0.131747	8.45389	0.037506	N	N	0.330295	0.310252	0.322555	0.384118	1.30817	0.727194	NA	NA	NA	NA	NA	NA	NA	NA
Q9BS40	LXN	Latexin	seq.20592.8	OID21003	1	0.122027	0.204033	N	N	0.126768	0.011645	0.0969271	0.155871	4.10832	0.250003	N	N	0.141738	0.247151	0.213204	0.0977578	5.79576	0.121981	NA	NA	NA	NA	NA	NA	NA	NA
Q9NVZ3	NECP2	Adaptin ear-binding coat-associated protein 2	seq.20915.68	OID30089	1	0.444678	0.451314	N	N	0.427978	0.393234	0.543577	0.433957	5.95367	0.113886	N	N	0.523876	0.438489	0.454274	0.410449	3.30838	0.346477	NA	NA	NA	NA	NA	NA	NA	NA
Q8TF65	GIPC2	PDZ domain-containing protein GIPC2	seq.20921.1	OID31153	1	0.376804	0.437129	N	N	0.330228	0.418107	0.425851	0.39341	2.81402	0.421198	N	N	0.427854	0.477423	0.407771	0.50947	3.66142	0.300422	NA	NA	NA	NA	NA	NA	NA	NA
Q8NHS0	DNJB8	DnaJ homolog subfamily B member 8	seq.20942.4	OID20093	1	0.249778	0.247886	N	N	0.26012	0.2354	0.31656	0.220126	2.4393	0.486361	N	N	0.304642	0.22643	0.260589	0.234216	1.6458	0.649051	NA	NA	NA	NA	NA	NA	NA	NA
Q96DE0	NUD16	U8 snoRNA-decapping enzyme	seq.20948.16	OID31484	1	0.684716	0.722567	Y	N	0.723296	0.636431	0.731145	0.663915	7.97298	0.0465735	Y	N	0.768778	0.703888	0.755454	0.6758	8.53886	0.036094	NA	NA	NA	NA	NA	NA	NA	NA
Q9NRG1	PRDC1	Phosphoribosyltransferase domain-containing protein 1	seq.20950.159	OID20867	1	0.815791	0.827178	N	N	0.835244	0.780941	0.835084	0.796248	7.15684	0.0670634	N	N	0.846385	0.808553	0.844521	0.7949	7.04587	0.0704501	NA	NA	NA	NA	NA	NA	NA	NA
Q9NQP4	PFD4	Prefoldin subunit 4	seq.20956.13	OID31212	1	0.0130793	0.0409232	N	N	0.00141232	-0.0366246	-0.0724706	0.0376826	3.05015	0.383958	N	N	-0.0321988	0.0653906	0.0483739	-0.00132463	2.45528	0.483428	NA	NA	NA	NA	NA	NA	NA	NA
Q8NFP7	NUD10	Diphosphoinositol polyphosphate phosphohydrolase 3-alpha	seq.20957.57	OID30198	1	0.0164793	0.0309621	N	N	0.0841159	-0.0145484	-0.0187141	0.00438657	2.70087	0.440079	N	N	0.0355526	0.017178	0.0687375	0.0384743	0.79907	0.849689	NA	NA	NA	NA	NA	NA	NA	NA
A6NCE7	MP3B2	Microtubule-associated proteins 1A/1B light chain 3 beta 2	seq.20965.18	OID30074	1	-0.0470796	-0.042043	N	N	-0.0123432	-0.0260448	-0.0594835	-0.0640762	0.942578	0.815142	N	N	-0.0434782	-0.059177	-0.0156452	-0.0267985	0.633098	0.888815	NA	NA	NA	NA	NA	NA	NA	NA
Q5JS54	PSMG4	Proteasome assembly chaperone 4	seq.20967.137	OID30514	1	-0.170952	0.10058	N	N	-0.138961	-0.0814419	-0.198676	-0.20227	3.56365	0.312601	N	N	0.0901998	0.0952923	0.0938121	0.135807	0.364283	0.947518	NA	NA	NA	NA	NA	NA	NA	NA
Q10587	TEF	Thyrotroph embryonic factor	seq.20990.48	OID30103	1	-0.0391445	0.0348416	N	N	-0.0785872	-0.0541171	0.00832267	-0.0287663	1.45121	0.693575	N	N	-0.0742266	0.0512861	0.0155313	0.116506	5.21584	0.156658	NA	NA	NA	NA	NA	NA	NA	NA
Q9NPI5	NRK2	Nicotinamide riboside kinase 2; Short=NRK 2; Short=NmR-K 2; EC=2.7.1.22	seq.20998.19	OID31163	1	-0.0215922	-0.0195538	N	N	-0.0423513	-0.0505393	0.0489554	-0.0219236	1.73927	0.628239	N	N	0.0266949	-0.0276395	-0.034901	0.00279749	0.857792	0.8356	NA	NA	NA	NA	NA	NA	NA	NA
Q8WUW1	BRK1	Protein BRICK1	seq.21001.393	OID20883	1	-0.087573	0.0590247	Y	N	-0.18009	-0.235221	-0.0425882	-0.0422229	11.4091	0.00970762	N	N	0.0954177	0.082404	0.0492262	-0.103859	6.96029	0.0731742	NA	NA	NA	NA	NA	NA	NA	NA
Q9BRF8	CSTP1	Uncharacterized metallophosphoesterase CSTP1	seq.21108.5	OID21053	1	-0.0125987	0.066481	Y	N	-0.0646153	-0.0511709	-0.0701279	0.129097	17.4741	0.000564532	Y	N	0.00626721	0.216043	0.023704	-0.021853	21.3604	8.86052e-05	NA	NA	NA	NA	NA	NA	NA	NA
Q9H832	UBE2Z	Ubiquitin-conjugating enzyme E2 Z	seq.21110.5	OID30427	1	0.269151	0.318144	N	N	0.314829	0.205944	0.31019	0.237314	3.6541	0.301319	Y	N	0.396704	0.256499	0.40001	0.323186	10.314	0.0160774	NA	NA	NA	NA	NA	NA	NA	NA
Q96A32	MLRS	Myosin regulatory light chain 2, skeletal muscle isoform	seq.21112.6	OID30917	1	0.528231	0.531906	Y	N	0.605277	0.518765	0.396767	0.530207	13.404	0.00383969	Y	N	0.399575	0.518696	0.621967	0.526025	16.1856	0.00103881	NA	NA	NA	NA	NA	NA	NA	NA
P30047	GFRP	GTP cyclohydrolase I feedback regulatory protein	seq.21118.48	OID30631	1	0.771196	0.807631	N	N	0.787782	0.787483	0.780294	0.757014	2.40022	0.493593	N	N	0.826738	0.794091	0.814829	0.815309	2.53679	0.468678	NA	NA	NA	NA	NA	NA	NA	NA
Q13084	RM28	39S ribosomal protein L28, mitochondrial	seq.21123.1	OID31023	1	0.00409493	0.0124428	Y	N	0.011453	0.0477385	-0.167351	0.0271543	9.07503	0.0283098	N	N	-0.123422	0.0352191	0.0592634	-0.0160505	6.73254	0.0809291	NA	NA	NA	NA	NA	NA	NA	NA
Q9NS37	ZHANG	CREB/ATF bZIP transcription factor	seq.21134.9	OID31206	1	0.00635073	0.022373	N	N	0.00700166	0.020902	0.0132261	0.0052571	0.0519289	0.996901	N	N	0.0249198	0.0349852	0.00491587	0.0570615	0.471383	0.925132	NA	NA	NA	NA	NA	NA	NA	NA
P49069	CAMLG	Calcium signal-modulating cyclophilin ligand	seq.21140.19	OID30952	1	0.219776	0.219959	Y	N	0.283156	0.279262	0.305025	0.14081	11.4305	0.00961207	Y	N	0.296798	0.148686	0.282985	0.299049	10.575	0.0142609	NA	NA	NA	NA	NA	NA	NA	NA
Q13938	Calcyphosin	Calcyphosin	seq.21143.10	OID31126	1	0.492855	0.555868	Y	N	0.399393	0.583569	0.478109	0.495435	9.50443	0.0232843	N	N	0.497876	0.575846	0.492665	0.61141	7.42462	0.0595274	NA	NA	NA	NA	NA	NA	NA	NA
Q8IXM2	BAP18	Chromatin complexes subunit BAP18	seq.21153.5	OID31150	1	0.273989	0.327832	Y	N	0.253015	0.0987821	0.306646	0.305968	9.22708	0.0264192	Y	N	0.340832	0.358414	0.31359	0.157007	8.77591	0.0324235	NA	NA	NA	NA	NA	NA	NA	NA
Q8WUX2	CHAC2	Putative glutathione-specific gamma-glutamylcyclotransferase 2	seq.21156.5	OID21230	1	0.34254	0.422688	Y	N	0.375954	0.143874	0.438841	0.336995	14.4634	0.00233766	Y	N	0.504919	0.438949	0.442609	0.198853	17.8351	0.000475668	NA	NA	NA	NA	NA	NA	NA	NA
Q96FZ7	CHMP6	Charged multivesicular body protein 6	seq.21160.4	OID30327	1	0.656547	0.708578	Y	N	0.683423	0.537585	0.745433	0.63253	18.91	0.00028537	Y	N	0.782501	0.690703	0.728863	0.590556	19.1292	0.000257084	NA	NA	NA	NA	NA	NA	NA	NA
Q9P2M1	LR2BP	LRP2-binding protein	seq.21181.10	OID30907	1	-0.00529866	0.00802041	N	N	0.0160415	0.00587191	-0.0264017	-0.017734	0.477334	0.923842	N	N	0.0073615	-0.0127706	0.0489299	0.0323848	1.26372	0.737767	NA	NA	NA	NA	NA	NA	NA	NA
Q6QNY1	BL1S2	Biogenesis of lysosome-related organelles complex 1 subunit 2	seq.21184.1	OID30856	1	0.0338121	0.0189068	N	N	0.0248992	0.113117	0.106259	-0.00276398	4.1925	0.241414	Y	N	0.132224	-0.00885958	-0.0426759	0.129173	8.74485	0.0328828	NA	NA	NA	NA	NA	NA	NA	NA
P53384	NUBP1	Nucleotide-binding protein 1	seq.21189.9	OID31412	1	0.0157275	0.0141275	N	N	0.0811727	-0.0284643	-0.036255	-0.000660205	3.25011	0.354647	N	N	-0.0336172	0.0101538	0.0627857	-0.0228955	1.97957	0.576658	NA	NA	NA	NA	NA	NA	NA	NA
P50453	Serpin B9	Serpin B9	seq.21221.67	OID20932	1	0.800391	0.804554	Y	N	0.832888	0.756885	0.817729	0.780116	10.1918	0.0170042	Y	N	0.827077	0.78469	0.834629	0.762605	10.2	0.0169407	NA	NA	NA	NA	NA	NA	NA	NA
P50225	SULT 1A1*2	SULT 1A1*2	seq.21227.18	OID21031	1	0.661887	0.705643	Y	N	0.687576	0.53124	0.710041	0.668036	12.8282	0.00502336	Y	N	0.752038	0.715262	0.718602	0.584588	13.2689	0.00408982	NA	NA	NA	NA	NA	NA	NA	NA
P07288	BPSA	Benign Prostate specific Antigen	seq.21232.39	OID30364	3	0.619415	0.622824	Y	N	0.535347	0.563426	0.667738	0.657219	14.3197	0.00250072	Y	N	0.670309	0.662199	0.541509	0.555763	15.0565	0.00176896	NA	NA	NA	NA	seq.8468.19	OID30364	0.768139	0.774111
Q9UM07	PADI4	Protein-arginine deiminase type-4	seq.21237.24	OID20832	1	0.560211	0.584005	N	N	0.538574	0.500021	0.598724	0.559994	2.78792	0.425492	N	N	0.59353	0.591803	0.565824	0.526426	1.96464	0.579778	NA	NA	NA	NA	NA	NA	NA	NA
Q96JB5	CK5P3	CDK5 regulatory subunit-associated protein 3	seq.21238.40	OID30985	1	0.060577	0.151805	N	N	0.0221863	0.0418031	0.0297252	0.0378994	0.093732	0.992579	N	N	0.117198	0.133113	0.153347	0.100743	0.498823	0.91915	NA	NA	NA	NA	NA	NA	NA	NA
Q93015	NAT6	N-acetyltransferase 6	seq.21241.1	OID30893	1	0.729797	0.742661	Y	N	0.761635	0.673638	0.716442	0.763927	8.19242	0.042198	Y	N	0.727977	0.777883	0.77231	0.687852	8.88548	0.0308528	NA	NA	NA	NA	NA	NA	NA	NA
P06748	NPM1	Nucleophosmin	seq.21244.57	OID20961	1	0.494292	0.513378	N	N	0.465613	0.428746	0.518297	0.516755	3.32637	0.34399	N	N	0.462421	0.534787	0.543499	0.42136	5.97694	0.112738	NA	NA	NA	NA	seq.8870.38	OID20961	-0.171312	0.212455
O00273	DFFA	DNA fragmentation factor subunit alpha	seq.21249.115	OID20620	1	0.213018	0.514606	Y	N	0.205976	0.0927802	0.32991	0.233892	8.01402	0.0457229	N	N	0.592539	0.524942	0.543572	0.414558	7.5319	0.0567444	NA	NA	NA	NA	NA	NA	NA	NA
P34913	HYES	Epoxide hydrolase 2	seq.21269.198	OID20119	1	0.114004	0.176844	N	N	0.143	0.100641	0.155631	0.0959904	1.21387	0.749679	N	N	0.182093	0.183377	0.168659	0.154201	0.204614	0.976841	NA	NA	NA	NA	NA	NA	NA	NA
Q15025	TNIP1	TNFAIP3-interacting protein 1	seq.21282.21	OID31120	1	-0.246895	0.212711	N	N	-0.229721	-0.206805	-0.217514	-0.282832	2.16046	0.539778	N	N	0.183432	0.232799	0.22588	0.168409	1.21219	0.750082	NA	NA	NA	NA	NA	NA	NA	NA
Q9H446	RWDD1	RWD domain-containing protein 1	seq.21323.2	OID21015	1	0.830915	0.844165	Y	N	0.86376	0.781753	0.834362	0.811329	13.2932	0.00404358	Y	N	0.850346	0.829162	0.866285	0.794402	9.89207	0.0195062	NA	NA	NA	NA	NA	NA	NA	NA
Q15814	TBCC	Tubulin-specific chaperone C	seq.21326.28	OID20942	1	0.583717	0.645701	Y	N	0.552762	0.626806	0.710344	0.549846	17.4936	0.000559332	Y	N	0.744672	0.629289	0.606708	0.694007	14.2812	0.00254638	NA	NA	NA	NA	NA	NA	NA	NA
P21579	SYT1	Synaptotagmin-1	seq.21328.2	OID31089	1	0.29012	0.242709	N	N	0.242474	0.260976	0.278331	0.297901	1.15089	0.764806	N	N	0.257632	0.259264	0.228792	0.240143	0.355617	0.94925	NA	NA	NA	NA	NA	NA	NA	NA
Q4VC05	BCL7A	B-cell CLL/lymphoma 7 protein family member A	seq.21331.19	OID31218	1	-0.0359225	-0.0443449	Y	N	-0.136324	0.0138054	0.0747123	-0.0286744	8.43532	0.0378216	Y	N	0.0449581	-0.0311484	-0.153496	0.020158	8.60347	0.0350551	NA	NA	NA	NA	NA	NA	NA	NA
Q9H173	SIL1	Nucleotide exchange factor SIL1	seq.21338.44	OID30207	1	0.0103474	0.0525698	N	N	0.0379936	-0.106909	-0.0201181	0.012657	3.51553	0.318754	N	N	-0.0335381	0.0788662	0.0580576	-0.0425245	4.58914	0.204476	NA	NA	NA	NA	NA	NA	NA	NA
Q02127	PYRD	Dihydroorotate dehydrogenase (quinone), mitochondrial	seq.21346.71	OID30137	1	-0.020045	0.0275473	N	N	0.0154443	0.013905	-0.110806	-0.0351203	3.17005	0.366143	N	N	-0.0398241	0.0137888	0.0772179	0.0710493	2.93776	0.401321	NA	NA	NA	NA	NA	NA	NA	NA
O43739	CYH3	Cytohesin-3	seq.21365.5	OID31208	1	0.026724	0.0198268	N	N	0.0287553	0.104861	-0.0497002	0.0259475	3.00585	0.390724	N	N	-0.0631998	0.025034	0.0132914	0.112622	3.92019	0.270212	NA	NA	NA	NA	NA	NA	NA	NA
Q8TCS8	PNPT1	Polyribonucleotide nucleotidyltransferase 1, mitochondrial	seq.21378.7	OID20445	1	0.308127	0.31426	N	N	0.321375	0.310203	0.31248	0.306313	0.0838825	0.993699	N	N	0.304684	0.314025	0.335912	0.321167	0.255056	0.968247	NA	NA	NA	NA	NA	NA	NA	NA
Q9H777	RNZ1	Zinc phosphodiesterase ELAC protein 1	seq.21382.70	OID31029	1	0.553975	0.576295	Y	N	0.589132	0.3647	0.52692	0.552899	13.8767	0.00307781	Y	N	0.547422	0.578105	0.615253	0.39585	14.2919	0.00253362	NA	NA	NA	NA	NA	NA	NA	NA
O43776	SYNC	Asparaginyl-tRNA synthetase, cytoplasmic	seq.21383.37	OID31035	1	0.746485	0.760378	N	N	0.76655	0.683705	0.760845	0.73724	5.25542	0.154021	N	N	0.76567	0.756138	0.776989	0.69796	4.75221	0.190867	NA	NA	NA	NA	NA	NA	NA	NA
P04066	Alpha-L-fucosidase I	Alpha-L-fucoside fucohydrolase	seq.21384.2	OID20261	1	0.827865	0.840801	Y	Y	0.73315	0.871805	0.654834	0.842022	67.6133	1.3842e-14	Y	Y	0.675743	0.850109	0.773104	0.867222	53.4468	1.47224e-11	NA	NA	NA	NA	NA	NA	NA	NA
Q9H156	SLIK2	SLIT and NTRK-like protein 2	seq.21385.5	OID21409	1	0.675053	0.707269	Y	N	0.676642	0.565197	0.582571	0.69269	13.4734	0.00371706	Y	N	0.602888	0.716181	0.73806	0.62352	15.7486	0.00127679	NA	NA	NA	NA	NA	NA	NA	NA
Q16819	MEP1A	Meprin A subunit alpha	seq.21387.64	OID31459	2	0.11447	0.112679	N	N	0.0842759	0.239622	0.151708	0.102928	4.61386	0.202357	N	N	0.149412	0.107878	0.0826724	0.182148	1.91574	0.590078	NA	NA	NA	NA	NA	NA	NA	NA
P0DN86	b-CF	Choriogonadotropin subunit beta 3	seq.21391.17	OID30671	1	0.0971465	0.100396	N	N	0.0660568	0.00365437	0.176882	0.104014	4.26874	0.23387	N	N	0.150703	0.0576645	0.125852	0.121107	2.7818	0.426505	NA	NA	NA	NA	NA	NA	NA	NA
Q9Y5V3	MAGD1	Melanoma-associated antigen D1	seq.21392.15	OID21181	1	0.0875385	0.146239	N	N	0.154781	0.119646	0.186276	0.0349064	7.54039	0.0565297	N	N	0.268552	0.113245	0.183184	0.154738	5.92719	0.115207	NA	NA	NA	NA	NA	NA	NA	NA
P23526	SAHH	Adenosylhomocysteinase	seq.21393.62	OID20199	1	0.105238	0.319252	N	N	0.0794551	0.0972409	0.02773	0.106171	1.36913	0.712787	N	N	0.294501	0.321565	0.320117	0.293525	0.328979	0.954489	NA	NA	NA	NA	NA	NA	NA	NA
O14917	PCD17	Protocadherin-17	seq.21395.23	OID20132	1	0.63728	0.705243	N	N	0.67411	0.637759	0.572982	0.635897	4.65654	0.198745	N	N	0.662739	0.699974	0.739344	0.683662	4.41757	0.219762	NA	NA	NA	NA	NA	NA	NA	NA
Q2VWP7	PRTG	Protogenin	seq.21397.21	OID21443	1	0.619045	0.652371	N	N	0.589704	0.615426	0.613395	0.608136	0.379869	0.944369	Y	N	0.668342	0.616269	0.650899	0.729462	8.50868	0.0365893	NA	NA	NA	NA	NA	NA	NA	NA
Q5TA50	CPTP	Ceramide-1-phosphate transfer protein	seq.21426.88	OID30106	2	-0.0185204	-0.0174481	N	N	0.0390247	-0.0180147	-0.0311108	-0.0397245	1.9081	0.591698	N	N	-0.0346541	-0.0415218	0.0516987	-0.0131388	2.70841	0.438801	NA	NA	NA	NA	NA	NA	NA	NA
P52888	THOP1	Thimet oligopeptidase	seq.21429.50	OID20194	1	0.404606	0.50441	N	N	0.458656	0.462814	0.341803	0.378847	5.42159	0.143404	N	N	0.509608	0.46251	0.553334	0.552708	5.8442	0.119441	NA	NA	NA	NA	NA	NA	NA	NA
P47712	cPLA2-alpha	Cytosolic phospholipase A2 alpha	seq.21430.4	OID20685	1	0.827306	0.839973	Y	N	0.841839	0.759414	0.84609	0.815177	10.3479	0.0158287	Y	N	0.861671	0.830118	0.84927	0.768265	11.812	0.00805571	NA	NA	NA	NA	NA	NA	NA	NA
P78410	BT3A2	Butyrophilin subfamily 3 member A2	seq.21433.3	OID20540	1	0.427145	0.517125	N	N	0.517745	0.417665	0.420981	0.406498	6.305	0.0976785	Y	N	0.487839	0.502897	0.634844	0.528092	13.0529	0.00452363	NA	NA	NA	NA	NA	NA	NA	NA
P78362	SRPK2	Serine/threonine-protein kinase SRPK2	seq.21435.143	OID20502	1	0.160696	0.325446	N	N	0.125272	0.0728243	0.134774	0.167051	1.87449	0.59886	N	N	0.294326	0.364506	0.262786	0.227644	6.52319	0.0887526	NA	NA	NA	NA	NA	NA	NA	NA
Q8WYN0	ATG4A	Cysteine protease ATG4A	seq.21436.56	OID21246	1	0.441847	0.524423	N	N	0.41424	0.392985	0.464022	0.446501	1.41931	0.701015	N	N	0.550045	0.539559	0.469546	0.515874	3.11078	0.374859	NA	NA	NA	NA	NA	NA	NA	NA
P16455	MGMT	Methylated-DNA--protein-cysteine methyltransferase	seq.21437.77	OID20588	1	0.814198	0.830737	N	N	0.791774	0.785097	0.851101	0.807484	7.06657	0.069806	N	N	0.86407	0.828508	0.803543	0.806363	7.70179	0.0525941	NA	NA	NA	NA	NA	NA	NA	NA
Q9C035	TRIM5	Tripartite motif-containing protein 5	seq.21438.45	OID20526	1	-0.0378642	0.165935	N	N	-0.0915997	-0.0544975	-0.105307	-0.0501087	0.976517	0.806934	N	N	0.137704	0.165286	0.122242	0.128451	0.712175	0.870336	NA	NA	NA	NA	NA	NA	NA	NA
P14317	HCLS1	Hematopoietic lineage cell-specific protein	seq.21439.37	OID20648	1	0.753694	0.770899	N	N	0.76242	0.675958	0.760904	0.74866	5.60534	0.132472	N	N	0.771671	0.765597	0.780728	0.698487	5.40344	0.14453	NA	NA	NA	NA	NA	NA	NA	NA
P78325	ADAM-8	ADAM 8	seq.21440.9	OID21039	1	0.101172	0.246619	N	N	0.110791	0.162379	0.159576	0.0694637	2.83692	0.417458	N	N	0.241746	0.236269	0.249869	0.268103	0.233282	0.972046	NA	NA	NA	NA	NA	NA	NA	NA
P17643	gp75	gp75	seq.21441.20	OID30517	1	0.307406	0.20907	Y	N	0.132868	0.299365	0.108411	0.347286	23.5117	3.15864e-05	Y	N	0.0394368	0.239193	0.133355	0.289079	12.8813	0.00490038	NA	NA	NA	NA	NA	NA	NA	NA
Q92851	Caspase-10:region 2	Caspase-10:region 2	seq.21450.333	OID20893	2	-0.0437672	0.199813	N	N	-0.0515806	-0.0760763	0.0332367	-0.066606	2.31793	0.509094	N	N	0.257027	0.20885	0.172716	0.113674	3.18022	0.364665	NA	NA	0.02	NA	seq.5340.24	OID20893	0.482946	0.508512
Q13490	cIAP-1	Baculoviral IAP repeat-containing protein 2	seq.21464.2	OID21217	1	0.0514657	0.154816	N	N	0.036101	0.010067	0.127236	0.0654322	2.10797	0.550302	N	N	0.237569	0.178078	0.14191	0.0794353	3.69985	0.295752	NA	NA	NA	NA	seq.10046.55	OID21217	0.561062	0.634938
O43396	TXNL1	Thioredoxin-like protein 1	seq.21475.137	OID30872	1	-0.0288164	-0.0531984	N	N	-0.0230249	-0.00222018	0.0278657	-0.0470212	1.34131	0.719347	N	N	0.0278126	-0.0821383	-0.0495812	0.0302369	4.05709	0.255365	NA	NA	NA	NA	NA	NA	NA	NA
Q7L5Y9	MAEA	Macrophage erythroblast attacher	seq.21477.105	OID21206	1	-0.000120646	0.119025	N	N	0.0333539	0.112457	-0.0378046	-0.0595577	6.75596	0.0800965	N	N	0.103541	0.0806772	0.141832	0.226974	4.5229	0.210257	NA	NA	NA	NA	NA	NA	NA	NA
Q99717	SMAD5	SMAD5	seq.21478.20	OID21353	1	0.0559274	0.0723818	N	N	0.0711912	0.0547082	0.0599866	0.0681502	0.0554975	0.99658	N	N	0.0783859	0.0832196	0.0804826	0.0691564	0.0377166	0.998074	NA	NA	NA	NA	NA	NA	NA	NA
P27701	CD82 antigen	CD82 antigen	seq.21480.2	OID31256	1	0.00189064	0.00436239	N	N	0.0255416	-0.0293207	0.0373767	-0.000546162	0.756711	0.859791	N	N	0.0175445	-6.81531e-05	0.0443747	0.0155854	0.591224	0.898438	NA	NA	NA	NA	NA	NA	NA	NA
P10644	KAP0	cAMP-dependent protein kinase type I-alpha regulatory subunit	seq.21483.155	OID20146	1	0.552247	0.586369	Y	N	0.638019	0.426056	0.471741	0.543501	17.2334	0.000632765	Y	N	0.515768	0.581318	0.671516	0.470162	17.5119	0.000554503	NA	NA	NA	NA	NA	NA	NA	NA
Q16853	VAP-1	Vascular adhesion protein-1	seq.21491.7	OID20389	1	0.716551	0.790584	Y	N	0.637733	0.73042	0.735662	0.743241	12.9859	0.00466723	Y	N	0.790585	0.815817	0.726629	0.766327	15.5125	0.00142719	NA	NA	NA	NA	NA	NA	NA	NA
Q15846	CLUL1	Clusterin-like protein 1	seq.21492.19	OID20198	1	0.614382	0.630714	N	N	0.643263	0.565239	0.63288	0.614778	2.46083	0.482412	N	N	0.649724	0.617165	0.671801	0.559451	5.73709	0.125126	NA	NA	NA	NA	NA	NA	NA	NA
O15354	GPR37	Prosaposin receptor GPR37	seq.21495.134	OID20095	1	0.66183	0.727299	Y	N	0.691021	0.620169	0.732644	0.621037	11.9485	0.00756163	Y	N	0.788358	0.693122	0.775253	0.670814	18.2572	0.000389254	NA	NA	NA	NA	NA	NA	NA	NA
Q9Y4L1	HYOU1	Hypoxia up-regulated protein 1	seq.21497.32	OID20300	1	0.372365	0.414782	Y	N	0.419734	0.375662	0.228258	0.355349	7.94083	0.0472505	Y	N	0.27255	0.427785	0.474733	0.338585	11.4856	0.00937004	NA	NA	NA	NA	NA	NA	NA	NA
Q99807	COQ7	5-demethoxyubiquinone hydroxylase, mitochondrial	seq.21499.17	OID30217	1	0.225851	0.203212	N	N	0.24675	0.219071	0.145877	0.241617	2.36761	0.499692	N	N	0.0861788	0.229794	0.223171	0.184886	4.92459	0.177403	NA	NA	NA	NA	NA	NA	NA	NA
Q92185	SIA8A	Alpha-N-acetylneuraminide alpha-2,8-sialyltransferase	seq.21508.7	OID30442	2	-0.0103601	0.0267378	N	N	-0.0838834	-0.0578501	0.00138188	0.0348828	4.83647	0.184171	N	N	-0.00552378	0.0607271	-0.0232208	0.0374187	2.47845	0.479199	NA	NA	NA	NA	NA	NA	NA	NA
Q9H1C3	GL8D2	Glycosyltransferase 8 domain-containing protein 2	seq.21509.29	OID20825	1	0.0234924	0.0224357	Y	N	-0.0562139	0.0967335	-0.110074	0.0915978	13.2569	0.00411267	N	N	-0.0433044	0.0818835	-0.049965	0.0734473	7.22753	0.0649886	NA	NA	NA	NA	NA	NA	NA	NA
P34947	GRK5	G protein-coupled receptor kinase 5	seq.21510.24	OID20066	1	-0.0307522	0.0629277	N	N	-0.0063722	0.00847505	-0.0903863	0.00727228	2.14429	0.543005	N	N	0.029386	0.108962	0.0783729	0.071313	1.46295	0.690847	NA	NA	NA	NA	NA	NA	NA	NA
Q9BV94	EDEM2	ER degradation-enhancing alpha-mannosidase-like 2	seq.21512.6	OID30136	1	0.0170596	0.0254669	N	N	-0.0586947	-0.0704577	0.111159	0.0448258	7.43011	0.0593817	N	N	0.114846	0.0191266	-0.00431192	-0.00938622	2.91243	0.405324	NA	NA	NA	NA	NA	NA	NA	NA
P55210	Caspase-7	Caspase-7	seq.21513.1	OID31135	1	0.207189	0.439273	N	N	0.28148	0.092828	0.145207	0.212219	6.98869	0.0722593	Y	N	0.40745	0.453358	0.485417	0.301988	8.00109	0.0459891	NA	NA	NA	NA	NA	NA	NA	NA
P13224	GP1BB	Platelet glycoprotein Ib beta chain	seq.21514.1	OID30174	1	0.477778	0.522646	N	N	0.511747	0.435824	0.511974	0.454797	2.86317	0.413206	N	N	0.532733	0.506231	0.571488	0.490052	3.0739	0.380371	NA	NA	NA	NA	NA	NA	NA	NA
Q9H0C8	ILKAP	Integrin-linked kinase-associated serine/threonine phosphatase 2C	seq.21523.71	OID20855	1	-0.0726999	0.179344	Y	N	-0.0384179	-0.17187	0.0714489	-0.0850723	8.47696	0.0371173	N	N	0.272192	0.179189	0.222026	0.100915	4.53786	0.208938	NA	NA	NA	NA	NA	NA	NA	NA
Q8IYV9	sperm-egg fusion protein 1	Izumo sperm-egg fusion protein 1	seq.21526.88	OID31159	1	0.00531825	0.00582759	N	N	0.0745043	0.0713371	-0.0817877	-0.0214096	5.84224	0.119543	N	N	-0.0753251	-0.0227088	0.0779009	0.0664326	5.68108	0.1282	NA	NA	NA	NA	NA	NA	NA	NA
P33241	LSP1	Lymphocyte-specific protein 1	seq.21533.51	OID20530	1	0.63387	0.706005	N	N	0.677811	0.551248	0.663464	0.623747	7.28942	0.0632233	N	N	0.727648	0.706141	0.734436	0.641394	5.20949	0.157085	NA	NA	NA	NA	NA	NA	NA	NA
Q9BTE6	AASD1	Alanyl-tRNA editing protein Aarsd1	seq.21535.5	OID21311	1	-0.0860953	0.131092	N	N	-0.166417	0.0213398	-0.122004	-0.0486513	7.12864	0.0679088	N	N	0.084276	0.17412	0.0809712	0.175754	3.88334	0.27434	NA	NA	NA	NA	NA	NA	NA	NA
Q96I15	SCLY	Selenocysteine lyase	seq.21537.33	OID21425	1	0.697832	0.703928	Y	N	0.736436	0.728172	0.723196	0.657484	9.54622	0.0228447	Y	N	0.743743	0.673713	0.715708	0.756397	8.14793	0.0430513	NA	NA	NA	NA	NA	NA	NA	NA
Q9UBW5	BIN2	Bridging integrator 2	seq.21540.73	OID21067	1	0.742693	0.765859	Y	N	0.799395	0.676747	0.727641	0.714003	15.7863	0.00125428	Y	N	0.75157	0.74139	0.813564	0.697221	14.5149	0.00228186	NA	NA	NA	NA	NA	NA	NA	NA
Q6QNK2	AGRD1	Adhesion G-protein coupled receptor D1	seq.21546.20	OID30588	1	0.811543	0.807625	N	N	0.774415	0.81518	0.784741	0.803	2.66193	0.446736	N	N	0.77775	0.794472	0.782666	0.793526	0.585861	0.899661	NA	NA	NA	NA	NA	NA	NA	NA
P36269	GGT5	Gamma-glutamyltransferase 5	seq.21548.20	OID20909	1	0.364996	0.469795	Y	N	0.365467	0.360645	0.451683	0.287454	8.50342	0.0366765	Y	N	0.55695	0.417365	0.462969	0.404406	7.9898	0.0462229	NA	NA	NA	NA	NA	NA	NA	NA
Q15067	ACOX1	Peroxisomal acyl-coenzyme A oxidase 1	seq.21552.9	OID20124	1	0.491623	0.506277	N	N	0.470702	0.478263	0.555159	0.485731	2.55149	0.466058	N	N	0.566301	0.501217	0.482348	0.486276	2.58537	0.46006	NA	NA	NA	NA	NA	NA	NA	NA
Q13451	FKBP5	FK506-binding protein 5	seq.21577.35	OID20937	1	0.710776	0.739865	Y	N	0.678995	0.634024	0.812298	0.702262	22.8443	4.35157e-05	Y	N	0.834572	0.736636	0.709632	0.67252	23.4708	3.22121e-05	NA	NA	NA	NA	NA	NA	NA	NA
Q9H9E1	ANRA2	Ankyrin repeat family A protein 2	seq.21590.9	OID31173	1	0.0715785	0.0552033	N	N	0.0385705	0.133687	0.0221736	0.0545064	1.85221	0.60364	N	N	0.0210174	0.0554101	-0.0314088	0.131042	4.46745	0.215212	NA	NA	NA	NA	NA	NA	NA	NA
Q96NB1	FOPNL	LisH domain-containing protein FOPNL	seq.21655.18	OID21209	1	-0.0898462	0.23789	N	N	-0.0546004	-0.0463641	-0.0643548	-0.152874	4.59357	0.204095	N	N	0.244358	0.2048	0.283905	0.184606	2.66412	0.446359	NA	NA	NA	NA	NA	NA	NA	NA
Q92185	SIA8A	Alpha-N-acetylneuraminide alpha-2,8-sialyltransferase	seq.21663.149	OID30442	1	0.059462	0.0888821	N	N	0.0968245	-0.00785808	0.138783	0.0388989	3.80246	0.283601	N	N	0.0864877	0.0608331	0.142485	0.116244	2.2038	0.531201	NA	NA	NA	NA	NA	NA	NA	NA
O00308	WWP2	NEDD4-like E3 ubiquitin-protein ligase WWP2	seq.21670.52	OID20926	1	0.0930013	0.342784	N	N	0.0862308	0.0409093	0.178551	0.0954458	2.66664	0.445926	N	N	0.407191	0.351479	0.334467	0.295091	2.21551	0.528901	NA	NA	NA	NA	NA	NA	NA	NA
Q13410	Butyrophilin 1A1	Butyrophilin subfamily 1 member A1	seq.21674.132	OID31363	1	0.00952324	0.0106997	N	N	0.0224392	0.0660446	-0.00377219	0.00760032	0.763977	0.858062	N	N	0.00646339	0.00849604	0.00648197	0.0868709	1.26626	0.737159	NA	NA	NA	NA	NA	NA	NA	NA
P43146	DCC	DCC	seq.21685.29	OID30953	1	0.362761	0.381507	N	N	0.328539	0.3015	0.454634	0.349759	5.14977	0.161153	N	N	0.460248	0.357185	0.353198	0.351121	3.73795	0.291186	NA	NA	NA	NA	NA	NA	NA	NA
Q9NPG4	PCD12	Protocadherin-12	seq.21704.8	OID31045	1	-0.0158175	0.000186886	N	N	-0.0645963	-0.0993502	0.0641378	0.00540849	4.82092	0.18539	N	N	0.065188	0.00985263	-0.0566271	-0.0240579	2.78653	0.425723	NA	NA	NA	NA	NA	NA	NA	NA
O15294	OGT1	UDP-N-acetylglucosamine--peptide N-acetylglucosaminyltransferase 110 kDa subunit	seq.21733.11	OID31300	1	0.0227952	0.0248271	N	N	0.042975	0.0494176	-0.00865185	0.0185948	0.624638	0.89077	N	N	-0.0335883	0.0189218	0.0580627	0.0448054	1.53958	0.673167	NA	NA	NA	NA	NA	NA	NA	NA
Q9Y223	GLCNE	Bifunctional UDP-N-acetylglucosamine 2-epimerase/N-acetylmannosamine kinase	seq.21739.7	OID21231	1	0.387101	0.460322	N	N	0.350048	0.256302	0.454804	0.393268	7.31164	0.0626009	Y	N	0.507578	0.479281	0.43417	0.302452	9.75893	0.0207305	NA	NA	NA	NA	NA	NA	NA	NA
Q6GQQ9	OTU7B	OTU domain-containing protein 7B	seq.21742.43	OID31064	1	0.663157	0.707206	Y	N	0.682542	0.584819	0.762074	0.632862	18.1092	0.000417625	Y	N	0.783632	0.681462	0.731119	0.618518	17.2609	0.000624564	NA	NA	NA	NA	NA	NA	NA	NA
P51688	SPHM	N-sulphoglucosamine sulphohydrolase	seq.21766.50	OID30341	1	0.65417	0.718609	N	N	0.662282	0.7222	0.638593	0.65241	3.77859	0.286386	N	N	0.728615	0.723744	0.723602	0.758372	1.15941	0.762754	NA	NA	NA	NA	NA	NA	NA	NA
Q96HD9	ACY3	Aspartoacylase-2	seq.21781.9	OID30086	1	0.321167	0.337153	Y	N	0.44554	0.300888	0.205603	0.28347	15.1719	0.00167552	Y	N	0.267308	0.280685	0.454511	0.34422	13.6179	0.0034742	NA	NA	NA	NA	NA	NA	NA	NA
O95684	FR1OP	FGFR1 oncogene partner	seq.21793.4	OID20084	1	-0.106058	0.200727	N	N	-0.186656	-0.0702965	-0.0980631	-0.0303086	7.58391	0.0554411	N	N	0.201525	0.280043	0.150221	0.20956	6.02296	0.110499	NA	NA	NA	NA	NA	NA	NA	NA
Q9H347	UBQL3	Ubiquilin-3	seq.21849.2	OID30096	1	-0.017631	-2.16632e-05	N	N	0.013411	0.0662292	-0.0639502	-0.0327901	2.81508	0.421024	N	N	-0.0794873	-0.0190595	0.0485016	0.108927	5.81064	0.121195	NA	NA	NA	NA	NA	NA	NA	NA
Q8NC01	CLC1A	CLEC-1	seq.21853.3	OID20099	1	0.0868713	0.142371	N	N	0.114935	0.131481	0.156306	0.0456025	3.78084	0.286122	N	N	0.139326	0.111268	0.223118	0.104533	4.31727	0.22918	NA	NA	NA	NA	NA	NA	NA	NA
P50053	KHK	Ketohexokinase	seq.21856.59	OID30241	1	-0.0823296	0.157738	N	N	-0.125544	0.0522678	-0.101757	-0.0442163	5.50571	0.138297	N	N	0.152873	0.21673	0.0823493	0.221518	6.30548	0.0976579	NA	NA	NA	NA	NA	NA	NA	NA
P31483	TIA1	Nucleolysin TIA-1 isoform p40	seq.21885.196	OID20068	1	0.775175	0.783093	Y	N	0.78737	0.660172	0.796445	0.77523	14.0613	0.00282291	Y	N	0.804045	0.784948	0.79076	0.67573	13.05	0.00452979	NA	NA	NA	NA	NA	NA	NA	NA
O75223	CG024	Uncharacterized protein C7orf24	seq.21889.2	OID30304	1	0.294701	0.390774	N	N	0.273244	0.369301	0.391972	0.270525	5.71584	0.126284	Y	N	0.501473	0.363138	0.372474	0.459322	7.86623	0.0488588	NA	NA	NA	NA	NA	NA	NA	NA
P03951	Coagulation Factor XI	Coagulation Factor XI	seq.2190.55	OID30773	1	0.661628	0.656134	Y	N	0.60545	0.667225	0.729914	0.680812	9.3591	0.0248785	N	N	0.719229	0.665121	0.628751	0.638097	5.13317	0.162301	0.681	0.693	NA	0.67	seq.2190.55	OID30773	0.660139	0.610331
Q9Y4X3	CTACK	C-C motif chemokine 27	seq.2192.63	OID20121	1	0.183022	0.193466	N	N	0.170625	0.169405	0.192181	0.161843	0.209156	0.976098	N	N	0.176801	0.254503	0.202243	0.0937526	5.65505	0.129653	0.232	0.236	0.38	NA	seq.2192.63	OID20121	0.0558291	0.133075
P01137	TGF-b1	Transforming growth factor beta-1	seq.21925.15	OID20621	3	-0.100123	0.200343	N	N	-0.123893	-0.131036	-0.136399	-0.0949103	0.596114	0.897321	N	N	0.202365	0.225472	0.222806	0.123074	2.16691	0.538496	NA	NA	-0.01	0.06	seq.2333.72	OID20621	0.234568	0.405567
Q7Z5R6	AB1IP	Amyloid beta A4 precursor protein-binding family B member 1-interacting protein	seq.21949.4	OID21359	1	0.535781	0.616116	Y	N	0.584228	0.514473	0.588009	0.486334	8.00386	0.0459319	Y	N	0.644441	0.566465	0.673903	0.63608	10.5692	0.0142986	NA	NA	NA	NA	NA	NA	NA	NA
P27540	ARNT	Aryl hydrocarbon receptor nuclear translocator	seq.21951.32	OID20432	1	-0.0234889	-0.0369722	N	N	-0.0347369	-0.00286118	-0.0389182	-0.0107047	0.340455	0.952249	N	N	-0.0656544	-0.00972534	-0.0569674	0.0292685	1.79104	0.616887	NA	NA	NA	NA	NA	NA	NA	NA
P46379	BAT3	Large proline-rich protein BAT3	seq.21955.36	OID20114	1	0.563231	0.582365	Y	N	0.62742	0.451836	0.578027	0.541952	10.4049	0.0154203	Y	N	0.615285	0.56582	0.637212	0.466422	10.4722	0.0149509	NA	NA	NA	NA	NA	NA	NA	NA
Q6ZUJ8	BCAP	Phosphoinositide 3-kinase adapter protein 1	seq.21957.12	OID20587	1	-0.144254	0.25579	N	N	-0.180598	-0.254269	-0.060665	-0.139558	5.47009	0.140439	Y	N	0.334525	0.293819	0.18331	0.102656	11.8629	0.00786796	NA	NA	NA	NA	NA	NA	NA	NA
Q9Y5K6	CD2AP	CD2-associated protein	seq.21961.14	OID20177	1	0.392325	0.492125	N	N	0.476016	0.322283	0.33056	0.389131	7.51301	0.0572251	N	N	0.443578	0.51148	0.542927	0.388115	7.56492	0.0559136	NA	NA	NA	NA	NA	NA	NA	NA
P98082	DAB2	Disabled homolog 2	seq.21963.48	OID21428	1	0.78586	0.802034	N	N	0.799664	0.744364	0.76646	0.785518	3.31807	0.345136	N	N	0.78387	0.802567	0.814865	0.764492	3.24431	0.355469	NA	NA	NA	NA	NA	NA	NA	NA
P28845	DHI1	Corticosteroid 11-beta-dehydrogenase isozyme 1	seq.21967.20	OID20575	1	0.48551	0.446937	N	N	0.487206	0.503622	0.52539	0.480916	0.825345	0.843396	N	N	0.458589	0.429022	0.502866	0.466285	2.71132	0.438307	NA	NA	NA	NA	NA	NA	NA	NA
P42658	DPP6	Dipeptidyl aminopeptidase-like protein 6	seq.21969.5	OID21354	1	-0.093223	-0.0658696	N	N	-0.0425337	-0.0636427	-0.204747	-0.0846215	4.95804	0.174895	N	N	-0.183685	-0.0743805	-0.0331098	-0.0226335	4.75335	0.190775	NA	NA	NA	NA	NA	NA	NA	NA
Q01543	FLI1	Friend leukemia integration 1 transcription factor	seq.21971.47	OID21239	1	0.741607	0.746696	N	N	0.757379	0.695023	0.77092	0.727409	4.71994	0.193491	N	N	0.778316	0.735864	0.75591	0.697339	4.6003	0.203517	NA	NA	NA	NA	NA	NA	NA	NA
Q05084	ICA69	Islet cell autoantigen 1	seq.21975.22	OID20484	1	0.0996723	0.255267	N	N	0.09285	0.0540689	0.232309	0.0700584	6.4398	0.0920672	N	N	0.371361	0.244682	0.24506	0.201924	5.42319	0.143305	NA	NA	NA	NA	NA	NA	NA	NA
Q9Y6K9	IKK-gamma	I-kappa-B kinase gamma	seq.21976.4	OID20544	1	0.393695	0.477318	Y	N	0.475046	0.25313	0.453302	0.374032	11.9693	0.00748922	Y	N	0.525859	0.465454	0.547535	0.34242	11.3351	0.010045	NA	NA	NA	NA	NA	NA	NA	NA
P23229	Integrin a6	Integrin alpha-6	seq.21979.12	OID20528	1	-0.0981206	0.14705	N	N	-0.0785672	-0.0705988	-0.121211	-0.0893752	0.417073	0.936694	N	N	0.134829	0.155585	0.180232	0.177884	0.465055	0.926499	NA	NA	NA	NA	NA	NA	NA	NA
P23229	Integrin a6	Integrin alpha-6	seq.21979.8	OID20528	2	-0.13686	0.12099	N	N	-0.16114	-0.0997422	-0.0813571	-0.153543	1.72473	0.631449	N	N	0.200194	0.103373	0.12668	0.15158	2.22374	0.527288	NA	NA	NA	NA	NA	NA	NA	NA
P11215	Integrin alpha-M	Integrin alpha-M	seq.21981.2	OID21071	1	0.0216171	0.111475	N	N	0.0274575	0.0203355	-0.00677797	-0.00357342	0.378256	0.944697	N	N	0.0643035	0.0544911	0.109286	0.10397	1.1445	0.766344	NA	NA	NA	NA	NA	NA	NA	NA
Q9UKP3	ITBP2	Integrin beta-1-binding protein 2	seq.21985.61	OID20112	1	0.752415	0.767715	Y	N	0.766009	0.660679	0.785767	0.743339	10.106	0.017686	Y	N	0.80113	0.762279	0.779795	0.683947	9.73932	0.0209171	NA	NA	NA	NA	NA	NA	NA	NA
P06858	LPL	Lipoprotein lipase	seq.21987.76	OID20188	1	0.0383742	0.00517604	Y	N	-0.000198535	-0.171733	0.0694057	0.0852226	13.1336	0.00435648	N	N	0.0060029	0.0305247	0.0304166	-0.112814	4.04639	0.256498	NA	NA	NA	NA	NA	NA	NA	NA
Q9Y4K4	M4K5	Mitogen-activated protein kinase kinase kinase kinase 5	seq.21989.12	OID20899	1	0.713024	0.733386	N	N	0.737915	0.6569	0.722883	0.702151	4.18546	0.242121	N	N	0.74518	0.725854	0.755312	0.68523	3.59356	0.308829	NA	NA	NA	NA	NA	NA	NA	NA
Q96SB3	NEB2	Neurabin-2	seq.21991.79	OID20643	1	0.644617	0.672484	Y	N	0.682243	0.557685	0.586715	0.656724	8.99545	0.0293514	Y	N	0.612943	0.686721	0.706227	0.592596	9.34544	0.0250338	NA	NA	NA	NA	NA	NA	NA	NA
P29474	NOS	NOS	seq.21995.20	OID20834	1	0.00716399	0.20179	N	N	-0.0700355	0.00937327	-0.0119122	0.0189108	2.43458	0.48723	Y	N	0.222021	0.210108	0.0576978	0.185763	8.10805	0.0438307	NA	NA	NA	NA	NA	NA	NA	NA
Q9Y5A7	NUB1	NEDD8 ultimate buster 1	seq.21996.28	OID20510	1	0.741051	0.748987	Y	N	0.769229	0.658977	0.781816	0.723722	11.5976	0.00889662	N	N	0.782198	0.730509	0.771423	0.706274	6.34768	0.095867	NA	NA	NA	NA	NA	NA	NA	NA
P80303	NUCB2	Nucleobindin-2	seq.21999.61	OID21448	1	0.00410736	0.311011	N	N	-0.0310691	0.00919637	-0.0123249	0.0395549	1.68477	0.640326	N	N	0.334768	0.336278	0.357338	0.207643	4.41477	0.22002	NA	NA	NA	NA	NA	NA	NA	NA
Q9Y2J8	PADI2	Protein-arginine deiminase type-2	seq.22001.23	OID20467	1	0.0137263	0.0803327	N	N	-0.0007633	0.00572354	-0.0669016	0.0420496	2.63657	0.451115	N	N	0.0259688	0.0955479	0.0716345	0.0674175	1.07776	0.782446	NA	NA	NA	NA	NA	NA	NA	NA
Q15165	Paraoxonase-2	Paraoxonase 2	seq.22003.4	OID20088	1	-0.0275366	0.0366378	N	N	0.00600584	-0.00293556	-0.102799	-0.0574297	2.60135	0.457253	N	N	-0.0398331	0.0150772	0.0156138	0.122741	3.44839	0.327517	NA	NA	NA	NA	NA	NA	NA	NA
Q9P0J1	PDP1	[Pyruvate dehydrogenase [acetyl-transferring]]-phosphatase 1, mitochondrial	seq.22005.8	OID21176	1	0.11051	0.235361	N	N	0.0840397	0.0383825	0.185071	0.0991277	3.05528	0.383181	N	N	0.294597	0.224591	0.228155	0.203978	1.49869	0.682572	NA	NA	NA	NA	NA	NA	NA	NA
O75688	PPM1B	Protein phosphatase 1B	seq.22009.1	OID30548	1	0.106495	0.107287	N	N	0.131346	0.0267787	0.0694939	0.116573	2.18538	0.534835	N	N	0.0703118	0.102991	0.158479	0.063647	2.02237	0.567777	NA	NA	NA	NA	NA	NA	NA	NA
P39060	Endostatin	Endostatin	seq.2201.17	OID20332	1	0.572802	0.631663	Y	N	0.63374	0.472517	0.574094	0.501791	14.083	0.0027943	Y	N	0.629015	0.587568	0.673138	0.524535	10.0673	0.0180029	0.409	0.467	0.58	0.71	seq.2201.17	OID20332	0.487004	0.516513
O75569	PRKRA	Interferon-inducible double-stranded RNA-dependent protein kinase activator A	seq.22010.36	OID21225	1	-0.0596807	0.0382769	N	N	-0.128673	-0.0556187	-0.124517	-0.0231644	4.45156	0.216652	N	N	-0.0175799	0.0740162	-0.0256382	0.0229373	3.80316	0.283519	NA	NA	NA	NA	NA	NA	NA	NA
P50749	RASF2	Ras association domain-containing protein 2	seq.22013.6	OID21194	1	0.0523513	0.194694	N	N	-0.0151779	0.0260133	0.120396	0.0730657	3.83932	0.279346	N	N	0.207699	0.216679	0.173896	0.108831	2.4997	0.475345	NA	NA	NA	NA	NA	NA	NA	NA
P19474	RO52	E3 ubiquitin-protein ligase TRIM21	seq.22015.2	OID20533	1	0.117431	0.342366	Y	N	0.105052	0.0729457	0.284073	0.0936751	9.32823	0.0252307	N	N	0.393651	0.366852	0.317434	0.289519	2.67482	0.444523	NA	NA	NA	NA	NA	NA	NA	NA
Q9UQQ2	SH2B3	SH2B adapter protein 3	seq.22019.21	OID21222	1	-0.129304	0.124162	N	N	-0.217961	-0.0383011	-0.0446229	-0.121612	7.54766	0.0563464	N	N	0.213254	0.159573	0.0434155	0.164821	6.22987	0.100947	NA	NA	NA	NA	NA	NA	NA	NA
Q9Y6A5	TACC3	Transforming acidic coiled-coil-containing protein 3	seq.22027.13	OID21285	1	0.343148	0.492876	N	N	0.406539	0.242035	0.390711	0.328502	6.23039	0.100924	Y	N	0.5685	0.493935	0.537764	0.389012	8.08538	0.0442798	NA	NA	NA	NA	NA	NA	NA	NA
P42768	WASP	Wiskott-Aldrich syndrome protein	seq.22033.32	OID20479	1	0.478623	0.490653	N	N	0.52315	0.387707	0.542771	0.453484	7.42233	0.0595881	N	N	0.544948	0.474083	0.526781	0.409477	5.35091	0.147833	NA	NA	NA	NA	NA	NA	NA	NA
P42768	WASP	Wiskott-Aldrich syndrome protein	seq.22033.7	OID20479	2	0.128009	0.307529	N	N	0.133234	0.112137	0.256709	0.0804353	7.09745	0.0688558	N	N	0.371199	0.292438	0.317573	0.299733	1.72172	0.632116	NA	NA	NA	NA	NA	NA	NA	NA
Q05516	ZBT16	Zinc finger and BTB domain-containing protein 16	seq.22034.61	OID21205	1	-0.184107	0.128322	N	N	-0.235358	-0.0828224	-0.0873657	-0.150192	5.5776	0.13407	N	N	0.219506	0.16147	0.127004	0.164241	1.53474	0.674275	NA	NA	NA	NA	NA	NA	NA	NA
P54652	HSP70 protein 2	Heat shock-related 70 kDa protein 2	seq.22043.174	OID31424	1	0.124211	0.17167	N	N	0.201066	0.143608	0.20745	0.110589	3.69127	0.296789	N	N	0.241071	0.156012	0.259971	0.165741	4.41264	0.220216	NA	NA	NA	NA	NA	NA	NA	NA
P20908	CO5A1	Collagen alpha-1(V) chain	seq.22047.46	OID30587	1	0.155217	0.211078	N	N	0.16512	0.17354	0.222541	0.134207	1.86141	0.601664	N	N	0.256397	0.194973	0.208028	0.271079	1.76505	0.622571	NA	NA	NA	NA	NA	NA	NA	NA
Q12778	FOXO1A	Forkhead box protein O1A	seq.22055.31	OID20515	1	0.103105	0.239135	N	N	0.0876858	0.0267149	0.16378	0.0899266	2.45138	0.484142	N	N	0.294716	0.226292	0.236321	0.139172	3.37253	0.337675	NA	NA	NA	NA	NA	NA	NA	NA
Q9UBR1	BUP1	Beta-ureidopropionase	seq.22091.14	OID30352	1	-0.00259261	0.11844	N	N	0.0533132	-0.0443971	-0.0030362	-0.0201524	2.05139	0.561809	N	N	0.133573	0.138125	0.0680591	0.0530238	2.449	0.484578	NA	NA	NA	NA	NA	NA	NA	NA
P49662	Caspase-4	Caspase-4	seq.22092.43	OID31276	1	-0.0155619	-0.00347304	N	N	-0.0260247	0.0356969	-0.0400826	-0.000954185	0.906261	0.823917	N	N	-0.0111118	0.00884513	-0.0214912	-0.0246479	0.396266	0.941013	NA	NA	NA	NA	NA	NA	NA	NA
Q14781	CBX2	Chromobox protein homolog 2	seq.22095.29	OID30177	1	-0.0261109	-0.00843333	N	N	0.012301	-0.0512294	-0.0965011	-0.0110943	2.35069	0.50288	N	N	-0.0873352	-0.00324301	0.032997	0.0350234	2.8539	0.414704	NA	NA	NA	NA	NA	NA	NA	NA
P01033	TIMP-1	Metalloproteinase inhibitor 1	seq.2211.9	OID20418	3	0.447138	0.657942	N	N	0.414771	0.550688	0.491524	0.412906	7.53893	0.0565665	N	N	0.65197	0.663706	0.64579	0.626465	0.862049	0.834575	-0.146	0.401	0.2	0.4	seq.2211.9	OID20418	0.0647559	0.522058
P00750	tPA	Tissue-type plasminogen activator	seq.2212.69	OID20247	1	0.702323	0.724497	Y	N	0.704061	0.547673	0.676411	0.716333	15.4139	0.00149501	Y	N	0.716291	0.740302	0.706692	0.589846	13.8393	0.00313233	0.753	0.81	0.72	0.85	seq.2212.69	OID20247	0.654378	0.677354
Q53H82	LACB2	Endoribonuclease LACTB2	seq.22381.1	OID20150	1	0.801504	0.820045	Y	N	0.820056	0.778915	0.839536	0.777457	9.494	0.0233953	Y	N	0.853087	0.799505	0.836173	0.793097	8.95693	0.029869	NA	NA	NA	NA	NA	NA	NA	NA
O43423	AN32C	Acidic leucine-rich nuclear phosphoprotein 32 family member C	seq.22398.5	OID30203	1	0.0454396	-0.00154551	N	N	0.0656086	0.0769456	0.0556945	0.0233657	0.890884	0.827627	N	N	0.045286	-0.0450026	0.039331	0.0506306	3.72094	0.293217	NA	NA	NA	NA	NA	NA	NA	NA
P58294	EG-VEGF	Prokineticin-1	seq.2247.20	OID20543	2	-0.01309	-0.0012958	N	N	-0.0662483	-0.0815545	0.0214045	0.00735462	2.97187	0.395983	Y	N	0.0459594	0.0299274	-0.0483784	-0.195914	11.0687	0.0113599	0.119	0.18	0	NA	seq.2247.20	OID20543	-0.0481445	-0.0419631
P02533	K1C14	Keratin, type I cytoskeletal 14	seq.22482.87	OID20800	1	0.0508985	0.0527485	Y	N	-0.0269818	0.00220234	-0.0296132	0.125262	10.2255	0.0167436	Y	N	-0.0343554	0.116738	-0.00633379	0.00395961	8.041	0.045172	NA	NA	NA	NA	NA	NA	NA	NA
P23511	NFYA	Nuclear transcription factor Y subunit alpha	seq.22511.28	OID30134	1	0.00560935	0.12818	N	N	-0.0146186	-0.00616903	0.0260075	0.00653651	0.311334	0.957883	N	N	0.164799	0.119373	0.155781	0.102695	0.92028	0.820531	NA	NA	NA	NA	NA	NA	NA	NA
Q6UX82	YA003	Uncharacterized protein UNQ511/PRO1026	seq.22561.3	OID21251	1	-0.00540019	0.0190018	N	N	0.000872246	0.0508293	0.00675145	-0.0341055	1.51756	0.678224	N	N	0.0171748	0.0188106	-0.0352086	0.0488833	1.32368	0.723517	NA	NA	NA	NA	NA	NA	NA	NA
Q96J84	KIRR1	Kin of IRRE-like protein 1	seq.22563.4	OID30806	1	-0.0231019	0.0520412	N	N	-0.00733141	-0.00208508	-0.0141247	-0.0341412	0.337929	0.952744	N	N	0.0739085	0.0534586	0.0595328	0.0266677	0.293414	0.961262	NA	NA	NA	NA	NA	NA	NA	NA
P41586	PACR	Pituitary adenylate cyclase-activating polypeptide type I receptor	seq.22566.53	OID21188	1	0.014283	0.0318485	N	N	0.0836971	0.0384958	0.0788634	-0.0163238	3.93944	0.268078	N	N	0.0719677	0.0254492	0.0669062	0.0533526	0.785711	0.852882	NA	NA	NA	NA	NA	NA	NA	NA
Q86SJ6	DSG4	Desmoglein-4	seq.22568.7	OID21325	1	0.0734083	0.032326	Y	Y	0.022107	0.0219444	0.101458	0.312122	37.3223	3.93279e-08	Y	Y	0.0993832	0.239057	0.00589752	-0.0314616	24.9988	1.54491e-05	NA	NA	NA	NA	NA	NA	NA	NA
P36897	TGFR-1	TGF-beta receptor type-1	seq.22569.55	OID30502	1	0.0466779	0.0336057	N	N	0.0288725	-0.0392471	0.135258	0.0461499	4.00721	0.260686	N	N	0.035439	0.0422395	0.0705263	-0.0278175	1.46792	0.689694	NA	NA	NA	NA	NA	NA	NA	NA
P0DJD7	PEPA4	Pepsin A-4	seq.22572.19	OID30699	1	0.0308415	0.0343726	N	N	0.0171556	0.0271031	0.0472024	0.0617135	0.676259	0.878773	N	N	0.0693957	0.0726517	0.0198837	-0.00432442	1.65752	0.64642	NA	NA	NA	NA	NA	NA	NA	NA
Q9NNX6	DC-SIGN	CD209 antigen	seq.22576.1	OID20262	2	0.636287	0.671197	Y	N	0.668598	0.663328	0.733415	0.597136	14.5419	0.00225313	Y	N	0.767252	0.628581	0.69301	0.711331	17.9776	0.000444563	NA	NA	0.61	NA	seq.3029.52	OID20262	0.691814	0.709224
Q9NNX6	DC-SIGN	CD209 antigen	seq.22576.2	OID20262	3	0.511473	0.558935	N	N	0.497748	0.567646	0.597585	0.487415	6.69467	0.0822935	N	N	0.638001	0.534996	0.547777	0.620614	7.28642	0.0633078	NA	NA	0.61	NA	seq.3029.52	OID20262	0.691814	0.709224
Q9HCK4	ROBO2	Roundabout homolog 2	seq.22578.17	OID21007	2	0.557293	0.689322	N	N	0.507441	0.594251	0.538959	0.573478	3.52525	0.317502	N	N	0.673839	0.694227	0.652179	0.702942	2.19104	0.533716	NA	NA	0.57	NA	seq.5116.62	OID21007	0.45771	0.498064
Q9BZM5	ULBP-2	NKG2D ligand 2	seq.22583.47	OID20919	1	-0.0226414	0.0264064	N	N	-0.00876194	0.0162165	0.130367	0.0381665	3.43715	0.329005	N	N	0.183298	0.129075	0.052288	0.0515969	4.15033	0.245682	NA	NA	-0.04	NA	seq.3082.9	OID20919	-0.0957526	0.0760956
P21912	SDHB	Succinate dehydrogenase [ubiquinone] iron-sulfur subunit, mitochondrial	seq.22773.69	OID31436	1	0.302349	0.362606	N	N	0.284391	0.22992	0.395798	0.284383	4.89893	0.179349	N	N	0.467195	0.341966	0.352279	0.287555	6.50732	0.0893741	NA	NA	NA	NA	NA	NA	NA	NA
P16035	TIMP-2	Metalloproteinase inhibitor 2	seq.2278.61	OID30318	1	0.166718	0.27104	N	N	0.212415	0.210607	0.105264	0.1479	2.86649	0.412672	N	N	0.1924	0.272374	0.346183	0.234145	5.24479	0.154725	NA	NA	NA	NA	seq.2278.61	OID30318	0.197579	0.362731
Q6P9F5	TRI40	Tripartite motif-containing protein 40	seq.22815.4	OID30885	1	0.284661	0.278707	N	N	0.252947	0.303241	0.395828	0.25822	5.70964	0.126624	N	N	0.406649	0.252762	0.245704	0.278135	7.061	0.0699788	NA	NA	NA	NA	NA	NA	NA	NA
P13051	UNG	Uracil-DNA glycosylase	seq.22821.50	OID31419	1	-0.0456344	0.0460195	N	N	-0.0260212	-0.0676604	-0.0899985	-0.0421106	0.820147	0.844642	N	N	0.0303274	0.0346546	0.0724714	0.0657738	0.585075	0.89984	NA	NA	NA	NA	NA	NA	NA	NA
Q9H171	ZBP1	Z-DNA-binding protein 1	seq.22831.11	OID30526	1	0.469702	0.503069	N	N	0.506475	0.398059	0.470392	0.439544	3.51695	0.318571	N	N	0.494414	0.469881	0.553844	0.445608	4.74753	0.191246	NA	NA	NA	NA	NA	NA	NA	NA
Q13043	STK4	Serine/threonine-protein kinase 4	seq.22847.18	OID20140	1	0.416075	0.566675	Y	N	0.504618	0.293055	0.482565	0.344887	17.6795	0.000512121	Y	N	0.639751	0.522626	0.63103	0.443408	17.768	0.000491055	NA	NA	NA	NA	NA	NA	NA	NA
P17676	CEBPB	CCAAT/enhancer-binding protein beta	seq.22953.85	OID20052	2	-0.00660466	0.140821	N	N	0.0326416	0.0331153	-0.0203238	-0.0376972	1.96541	0.579617	N	N	0.0568466	0.134577	0.215194	0.10492	4.88014	0.180787	NA	NA	0.02	NA	seq.15675.3	OID20052	-0.102345	-0.0129004
P09455	CRBP	Retinol-binding protein 1	seq.22955.28	OID30913	1	0.0366989	0.0443481	N	N	0.0682246	-0.0594538	0.0459485	0.0266418	2.54518	0.467182	N	N	-0.0365069	0.0543202	0.0878652	0.0288448	2.77106	0.428286	NA	NA	NA	NA	seq.19279.42	OID30913	0.169663	0.067806
Q9UBT3	Dkk-4	Dickkopf-related protein 4	seq.22959.32	OID20934	1	0.628017	0.664597	Y	N	0.631979	0.523326	0.705372	0.598895	12.2636	0.00653262	Y	N	0.699757	0.643392	0.689686	0.563458	8.87242	0.0310362	NA	NA	0.21	NA	seq.3365.7	OID20934	-0.0640805	-0.0254498
P31994	FCG2B	Low affinity immunoglobulin gamma Fc region receptor II-b	seq.22960.8	OID21215	2	0.249709	0.273799	N	N	0.175245	0.192026	0.211368	0.270902	3.66972	0.299408	N	N	0.25796	0.299532	0.186265	0.192754	5.44015	0.142263	NA	NA	0.05	0.85	seq.3310.62	OID21215	-0.256565	-0.231625
O00602	FCN1	Ficolin-1	seq.22961.7	OID30690	1	0.800052	0.815919	N	N	0.774968	0.733495	0.754571	0.779109	2.53165	0.469598	N	N	0.787341	0.791597	0.794919	0.757254	1.56597	0.66713	NA	NA	NA	NA	seq.15582.25	OID30690	0.336916	0.506304
O95166	GBRAP	Gamma-aminobutyric acid receptor-associated protein	seq.22966.20	OID31414	2	0.104544	0.101514	Y	N	0.0988707	0.245601	-0.072337	0.104253	13.3076	0.00401645	Y	N	-0.0657464	0.115159	0.0831426	0.236143	12.3806	0.00618698	NA	NA	NA	NA	seq.17735.130	OID31414	0.117113	0.156913
P80098	MCP-3	C-C motif chemokine 7	seq.22969.12	OID20523	1	0.279735	0.336946	N	N	0.279817	0.2812	0.198853	0.240344	1.59545	0.660422	N	N	0.237217	0.294044	0.368796	0.366929	4.8401	0.183887	NA	NA	0.31	0.32	seq.4886.3	OID20523	0.260403	0.370402
P19876	Gro-g	Gro-gamma	seq.22973.8	OID20788	1	0.830637	0.843404	Y	N	0.850242	0.751288	0.865609	0.812508	18.8644	0.000291631	Y	N	0.872978	0.828728	0.856284	0.776698	14.5657	0.00222801	NA	NA	0.58	NA	seq.3148.49	OID20788	0.737105	0.763121
O94992	HEXI1	Protein HEXIM1	seq.22977.18	OID20589	2	0.0553776	0.409774	N	N	0.0678404	-0.0127472	0.153827	0.0357529	4.20879	0.239783	N	N	0.492239	0.425058	0.402771	0.319128	5.61695	0.131809	NA	NA	NA	NA	seq.15596.7	OID20589	0.611797	0.667085
P37235	HPCL1	Hippocalcin-like protein 1	seq.22981.3	OID20615	2	-0.150528	0.263679	Y	N	-0.266475	0.0242219	0.048108	-0.148748	23.407	3.32154e-05	Y	N	0.395615	0.289343	0.175149	0.349767	11.3785	0.00984577	NA	NA	NA	NA	seq.17791.25	OID20615	0.528042	0.600256
P18065	IGFBP-2	Insulin-like growth factor-binding protein 2	seq.22985.160	OID20325	1	0.832529	0.843347	N	N	0.806583	0.810113	0.859658	0.820262	5.79184	0.122189	N	N	0.860005	0.838782	0.812537	0.819041	5.01532	0.170678	NA	NA	0.88	0.87	seq.8469.41	OID20325	0.844716	0.84375
P45984	JNK2	Mitogen-activated protein kinase 9	seq.22987.69	OID20557	3	-0.158173	0.0936828	N	N	-0.105651	-0.101052	-0.0883215	-0.204098	5.43605	0.142514	N	N	0.121013	0.0972441	0.119645	0.0887589	0.286759	0.962499	NA	NA	-0.18	NA	seq.15604.18	OID20557	0.523956	0.607266
Q9UPY8	MARE3	Microtubule-associated protein RP/EB family member 3	seq.22992.6	OID31177	1	-0.00830458	-0.000344593	N	N	-0.0984893	0.0225834	-0.0250457	0.0283128	5.11734	0.163404	Y	N	-0.101188	0.0453346	-0.0874277	0.102107	10.4945	0.0147979	NA	NA	NA	NA	seq.16885.49	OID31177	-0.00537465	-0.0480932
O00626	MDC	C-C motif chemokine 22	seq.22993.9	OID20765	1	0.586214	0.612442	Y	N	0.60373	0.449243	0.460502	0.597911	14.94	0.00186868	Y	N	0.483925	0.628302	0.627718	0.468356	17.7336	0.000499138	NA	NA	0.63	NA	seq.3508.78	OID20765	0.444736	0.571416
Q8N2Q7	NLGN1	Neuroligin-1	seq.23000.22	OID30900	1	0.0276585	0.0232128	N	N	0.0923542	0.0469979	0.0244441	0.00325308	2.44233	0.485803	N	N	0.0192826	0.0284795	0.0316166	0.0192843	0.0411643	0.997806	NA	NA	NA	NA	seq.15620.4	OID30900	-0.00917009	-0.00689542
P58417	NXPH1	Neurexophilin-1	seq.23002.27	OID20849	2	0.0102237	-0.0112957	N	N	0.0268798	-0.00741555	0.0520341	0.00376059	0.671108	0.879978	N	N	0.0825395	-0.00733762	0.0178949	-0.00403304	1.79443	0.616149	NA	NA	-0.09	NA	seq.4562.1	OID20849	-0.0670855	-0.053766
P48304	REG1B	Lithostathine-1-beta	seq.23018.4	OID20266	2	0.759034	0.773404	N	N	0.718344	0.762453	0.787142	0.75687	4.61015	0.202673	N	N	0.797239	0.77628	0.734978	0.776394	4.50171	0.212138	NA	NA	NA	NA	seq.16770.3	OID20266	0.76719	0.794385
Q9HCY8	S100A14	Protein S100-A14	seq.23023.21	OID30987	2	0.180225	0.155668	N	N	0.195773	0.280395	0.112805	0.15719	4.44567	0.217188	N	N	0.122046	0.126499	0.15248	0.249552	3.20287	0.361391	NA	NA	NA	NA	seq.17828.3	OID30987	0.523407	0.329885
Q99963	SH3G3	Endophilin-A3	seq.23029.3	OID31334	2	-0.00385248	-0.00275551	N	N	0.0665456	-0.0672698	-0.0272222	-0.0167056	3.38858	0.335503	N	N	0.00937213	-0.0255967	0.0712531	-0.0695438	3.9447	0.267497	NA	NA	NA	NA	seq.18318.98	OID31334	0.185049	0.192724
O15389	Siglec-5	Sialic acid-binding Ig-like lectin 5	seq.23030.4	OID21082	2	0.789592	0.84824	Y	Y	0.766411	0.703924	0.855374	0.740705	26.5928	7.1659e-06	Y	N	0.878702	0.824647	0.816405	0.779612	14.666	0.00212554	NA	NA	NA	NA	seq.16792.4	OID21082	0.73084	0.759321
Q8IXJ6	SIRT2	NAD-dependent protein deacetylase sirtuin-2	seq.23031.6	OID21375	1	0.298127	0.439458	N	N	0.290422	0.237136	0.335681	0.295985	1.45144	0.693522	N	N	0.473801	0.451414	0.417315	0.386907	1.96155	0.580426	NA	NA	-0.03	0.21	seq.5030.52	OID21375	0.388676	0.517295
Q92851	Caspase-10:region 2	Caspase-10:region 2	seq.23156.146	OID20893	3	-0.116028	0.0819953	N	N	-0.16813	-0.0714598	-0.0293575	-0.106041	3.65069	0.301737	N	N	0.1409	0.110959	0.0397175	0.0886176	2.18974	0.533972	NA	NA	0.02	NA	seq.5340.24	OID20893	0.482946	0.508512
P01033	TIMP-1	Metalloproteinase inhibitor 1	seq.23173.3	OID20418	1	0.674459	0.699761	N	N	0.673887	0.663826	0.664899	0.677413	0.184206	0.980098	N	N	0.656598	0.69697	0.733855	0.6486	5.77359	0.123161	NA	NA	0.2	0.4	seq.2211.9	OID20418	0.0647559	0.522058
Q14118	Beta-dystroglycan	Beta-dystroglycan	seq.23176.17	OID20774	1	-0.227691	0.289672	N	N	-0.225513	-0.230268	-0.144722	-0.231809	1.83768	0.606771	N	N	0.358507	0.290661	0.303255	0.231212	2.50927	0.473618	NA	NA	NA	NA	seq.8369.102	OID20774	-0.345332	0.268167
P50135	HNMT	Histamine N-methyltransferase	seq.23178.95	OID20975	1	0.328453	0.397805	Y	N	0.354628	0.457425	0.367922	0.224946	16.9823	0.000712683	N	N	0.43752	0.334175	0.392643	0.482832	7.62926	0.0543285	NA	NA	NA	NA	NA	NA	NA	NA
Q96EP0	RNF31	E3 ubiquitin-protein ligase RNF31	seq.23183.6	OID30473	1	0.0710139	0.0638527	N	N	0.0638665	0.0986418	0.075459	0.0602599	0.29657	0.960672	N	N	0.0555783	0.0553776	0.0585003	0.102923	0.44528	0.930738	NA	NA	NA	NA	NA	NA	NA	NA
Q96L15	NAR5	Ecto-ADP-ribosyltransferase 5	seq.23202.78	OID30828	1	-0.018992	0.0372637	N	N	-0.0140043	0.0127576	-0.0587773	-0.00943074	0.731874	0.865682	N	N	-0.0743411	0.0569349	0.0659292	0.0396687	4.14725	0.245997	NA	NA	NA	NA	NA	NA	NA	NA
Q9HB40	RISC	Retinoid-inducible serine carboxypeptidase	seq.23203.3	OID30278	1	0.540197	0.612562	N	N	0.596556	0.563648	0.477309	0.510409	6.68201	0.0827542	N	N	0.547324	0.599821	0.63363	0.620355	3.17255	0.365778	NA	NA	NA	NA	NA	NA	NA	NA
O43805	SSNA1	Sjoegren syndrome nuclear autoantigen 1	seq.23242.2	OID31453	1	0.409769	0.490419	N	N	0.32948	0.476402	0.429725	0.430739	6.07489	0.108023	N	N	0.513628	0.518567	0.423576	0.491047	4.6899	0.195965	NA	NA	NA	NA	NA	NA	NA	NA
Q14088	Rab-33A	Ras-related protein Rab-33A	seq.23255.7	OID30122	1	0.347157	0.430368	Y	N	0.433262	0.178391	0.37259	0.323165	12.859	0.00495157	Y	N	0.452841	0.411771	0.495887	0.298489	8.95741	0.0298626	NA	NA	NA	NA	NA	NA	NA	NA
O43399	TPD54	Tumor protein D54	seq.23265.15	OID30609	1	0.804395	0.830135	N	N	0.80309	0.742143	0.79565	0.803365	4.55001	0.207872	N	N	0.832096	0.829998	0.827505	0.76305	6.7948	0.0787338	NA	NA	NA	NA	NA	NA	NA	NA
Q8WV92	MITD1	MIT domain-containing protein 1	seq.23266.62	OID20959	1	0.791903	0.808768	N	N	0.811683	0.749758	0.801213	0.784396	4.29024	0.231781	N	N	0.817842	0.801902	0.825104	0.785056	2.56177	0.464232	NA	NA	NA	NA	NA	NA	NA	NA
Q96AX2	RAB37	Ras-related protein Rab-37	seq.23282.19	OID20425	1	-0.0847211	0.0873173	N	N	-0.120185	0.0202107	-0.169335	-0.0795197	5.07839	0.166147	N	N	0.0065906	0.104781	0.0735305	0.137566	2.76102	0.429957	NA	NA	NA	NA	NA	NA	NA	NA
Q8N8E3	CE112	Centrosomal protein of 112 kDa	seq.23292.1	OID30115	1	-0.0465077	0.080042	N	N	-0.126241	0.0120366	-0.0733287	-0.0505945	3.23586	0.35667	Y	N	-0.0811133	0.105215	0.0346115	0.145908	9.3349	0.0251542	NA	NA	NA	NA	NA	NA	NA	NA
P48061	SDF-1	Stromal cell-derived factor 1	seq.2330.2	OID20464	3	0.225175	0.305311	N	N	0.24073	0.272027	0.174791	0.196258	1.98798	0.574905	N	N	0.307605	0.282226	0.315037	0.380978	2.32877	0.507031	NA	NA	0.49	NA	seq.3516.60	OID20464	0.342901	0.565567
Q6ZRY4	RBPS2	RNA-binding protein with multiple splicing 2	seq.23300.3	OID30257	1	0.718864	0.725344	Y	N	0.764636	0.62079	0.707025	0.698165	12.6829	0.00537514	Y	N	0.710067	0.709371	0.765381	0.638058	10.2157	0.0168185	NA	NA	NA	NA	NA	NA	NA	NA
Q96B36	AKTS1	Proline-rich AKT1 substrate 1	seq.23302.19	OID20895	1	0.679907	0.709241	N	N	0.700908	0.602316	0.696597	0.674258	4.96256	0.174559	N	N	0.739838	0.706034	0.71717	0.623857	6.5781	0.086633	NA	NA	NA	NA	NA	NA	NA	NA
O14530	TXND9	Thioredoxin domain-containing protein 9	seq.23303.131	OID31121	1	0.365323	0.420269	N	N	0.41559	0.30272	0.398687	0.332216	4.30015	0.230824	N	N	0.456184	0.391334	0.462026	0.358751	3.93135	0.268974	NA	NA	NA	NA	NA	NA	NA	NA
Q68J44	DUPD1	Dual specificity phosphatase DUPD1	seq.23323.25	OID30935	1	0.317083	0.333598	Y	N	0.402502	0.19347	0.153642	0.34893	17.6589	0.000517166	Y	N	0.115808	0.359532	0.40755	0.272818	19.5119	0.000214239	NA	NA	NA	NA	NA	NA	NA	NA
P01137	TGF-b1	Transforming growth factor beta-1	seq.2333.72	OID20621	2	0.0348216	0.208681	N	N	0.0910637	-0.00629222	-0.00112326	0.0698418	2.50386	0.474593	N	N	0.189064	0.250957	0.253821	0.176243	1.9333	0.586364	0.406	0.512	-0.01	0.06	seq.2333.72	OID20621	0.234568	0.405567
Q9BV20	MTNA	Methylthioribose-1-phosphate isomerase	seq.23340.37	OID30891	1	0.303519	0.409021	N	N	0.313697	0.25258	0.288643	0.293437	0.667541	0.880811	N	N	0.404921	0.410142	0.412148	0.33467	1.53929	0.673232	NA	NA	NA	NA	NA	NA	NA	NA
Q9BXI3	5NT1A	Cytosolic 5'-nucleotidase 1A	seq.23362.26	OID31102	1	-0.0038548	0.0823124	N	N	-0.0312759	0.00369486	0.0472495	-0.000478651	1.04267	0.790929	N	N	0.0948795	0.105942	0.0401251	0.0807881	1.3327	0.721383	NA	NA	NA	NA	NA	NA	NA	NA
Q15366	PCBP2	Poly(rC)-binding protein 2	seq.23363.41	OID31003	1	0.474904	0.518617	N	N	0.512847	0.359864	0.536965	0.462375	7.69474	0.0527603	N	N	0.577096	0.507954	0.554158	0.417861	7.01308	0.071482	NA	NA	NA	NA	NA	NA	NA	NA
Q96EM0	T3HPD	Trans-3-hydroxy-L-proline dehydratase	seq.23380.16	OID30314	1	0.130334	0.316784	N	N	0.0799798	0.210435	0.192305	0.0995955	4.58119	0.205161	N	N	0.409833	0.291624	0.284656	0.352159	4.77833	0.188768	NA	NA	NA	NA	NA	NA	NA	NA
O75695	XRP2	Protein XRP2	seq.23391.20	OID21302	1	0.0434176	0.260324	N	N	0.0316453	0.0501599	0.103671	0.0534808	0.903614	0.824556	N	N	0.343906	0.260291	0.2584	0.279553	1.97267	0.578098	NA	NA	NA	NA	NA	NA	NA	NA
O43903	GAS2	Growth arrest-specific protein 2	seq.23394.125	OID31285	1	0.325469	0.332216	N	N	0.277361	0.446918	0.302983	0.300474	6.49121	0.0900097	N	N	0.308848	0.312756	0.275973	0.452154	6.64576	0.0840881	NA	NA	NA	NA	NA	NA	NA	NA
Q6IBS0	TWF2	Twinfilin-2	seq.23396.21	OID30386	1	0.82544	0.83459	N	N	0.842077	0.770456	0.834507	0.816355	7.09374	0.0689691	N	N	0.841469	0.825664	0.851299	0.78088	7.37737	0.0607944	NA	NA	NA	NA	NA	NA	NA	NA
Q96A49	SYAP1	Synapse-associated protein 1	seq.23409.83	OID30636	1	0.686268	0.683221	Y	N	0.720838	0.611628	0.728874	0.667298	8.96693	0.0297338	Y	N	0.735181	0.665746	0.708837	0.611153	8.54082	0.036062	NA	NA	NA	NA	NA	NA	NA	NA
Q9UL42	PNMA2	Paraneoplastic antigen Ma2	seq.23411.108	OID30842	1	-0.00278286	0.00963	N	N	0.0629114	-0.0302105	-0.0176484	-0.0288395	2.735	0.434312	N	N	-0.00491129	0.00880909	0.0937854	-0.0807877	4.96856	0.174114	NA	NA	NA	NA	NA	NA	NA	NA
Q9NRS6	Sorting nexin-15	Sorting nexin-15	seq.23416.47	OID30644	1	0.672243	0.695766	N	N	0.675067	0.650452	0.677746	0.667405	0.376817	0.944989	N	N	0.713645	0.698796	0.686629	0.659002	1.53295	0.674687	NA	NA	NA	NA	NA	NA	NA	NA
P35249	RFC4	Replication factor C 37 kDa subunit	seq.23422.47	OID31376	1	-0.0936257	0.0112172	N	N	-0.0963462	-0.0961854	-0.0296931	-0.0983414	1.08656	0.780319	N	N	0.101665	0.0112909	-0.0197994	0.018135	2.59927	0.457618	NA	NA	NA	NA	NA	NA	NA	NA
Q9NZQ9	TMOD4	Tropomodulin-4	seq.23530.3	OID31246	1	-0.0117014	-0.0196945	N	N	0.0608016	-0.0156594	-0.104867	-0.0059375	4.67052	0.197575	N	N	-0.12543	-0.0238577	0.0706547	0.00184896	6.72418	0.0812284	NA	NA	NA	NA	NA	NA	NA	NA
P51948	MAT1	CDK-activating kinase assembly factor MAT1	seq.23540.3	OID31327	1	-0.0438514	0.0318172	N	N	-0.0407286	-0.14925	-0.0859332	-0.0156791	3.78875	0.285198	N	N	-0.0492813	0.0618357	0.0720106	-0.0641594	5.46319	0.140857	NA	NA	NA	NA	NA	NA	NA	NA
O75528	TADA3	Transcriptional adapter 3	seq.23551.15	OID31422	1	0.137002	0.23877	N	N	0.188224	0.0853284	0.271821	0.114929	7.30941	0.0626631	Y	N	0.367339	0.216973	0.291129	0.171294	8.1692	0.0426412	NA	NA	NA	NA	NA	NA	NA	NA
Q96IW2	SHD	SH2 domain-containing adapter protein D	seq.23554.2	OID30098	1	-0.0576731	-0.0346951	N	N	0.0361778	-0.092968	-0.116901	-0.0948895	6.23927	0.100532	Y	N	-0.0620029	-0.0920864	0.0855211	-0.0738088	9.8197	0.0201626	NA	NA	NA	NA	NA	NA	NA	NA
Q9BW85	CCD94	Coiled-coil domain-containing protein 94	seq.23571.93	OID31404	1	0.169343	0.232494	N	N	0.128361	0.175799	0.257649	0.147115	3.52573	0.31744	N	N	0.355283	0.214711	0.181852	0.238396	6.52346	0.0887421	NA	NA	NA	NA	NA	NA	NA	NA
P35916	VEGF sR3	Vascular endothelial growth factor receptor 3	seq.2358.19	OID21491	1	0.6248	0.689831	N	N	0.51128	0.635869	0.611299	0.59969	7.28814	0.0632594	N	N	0.682789	0.661142	0.62945	0.673501	1.79511	0.616	NA	NA	0.49	NA	seq.16035.8	OID21491	0.267802	0.426391
Q9UBU3	Obestatin	Obestatin	seq.23581.131	OID20175	1	0.799442	0.779673	Y	N	0.811161	0.749452	0.718219	0.782374	9.81786	0.0201796	N	N	0.738764	0.774332	0.763222	0.691221	6.60072	0.0857739	NA	NA	0.49	NA	seq.6518.85, seq.8447.11	OID20175, OID20175	0.001119597, 0.591648807	0.001050492, 0.384454403
Q9NV35	NUD15	Nucleotide triphosphate diphosphatase NUDT15	seq.23584.2	OID30102	1	0.127412	0.146978	N	N	0.112123	0.103649	0.191479	0.112446	1.59992	0.659408	N	N	0.204396	0.127908	0.142815	0.129815	1.36128	0.714636	NA	NA	NA	NA	NA	NA	NA	NA
P78358	Cancer/testis antigen 1B	Cancer/testis antigen 1B	seq.23586.32	OID31299	2	-0.0524372	-0.0351699	N	N	-0.0228306	-0.0267847	-0.0330635	-0.0772667	1.21875	0.748511	N	N	-0.0539634	-0.0523422	-0.00385435	-0.00912238	0.955607	0.811992	NA	NA	NA	NA	NA	NA	NA	NA
Q6YN16	HSDL2	Hydroxysteroid dehydrogenase-like protein 2	seq.23588.9	OID30256	1	0.690595	0.725644	Y	N	0.767571	0.666675	0.639054	0.669189	16.1906	0.00103638	Y	N	0.630809	0.717416	0.778755	0.713998	15.3875	0.00151374	NA	NA	NA	NA	NA	NA	NA	NA
O60662	KLH41	Kelch-like protein 41	seq.23660.112	OID30986	1	0.508039	0.487789	Y	N	0.598988	0.498913	0.445551	0.480748	10.5875	0.0141789	Y	N	0.428045	0.480838	0.577226	0.441088	9.20855	0.0266429	NA	NA	NA	NA	NA	NA	NA	NA
P17980	PRS6A	26S protease regulatory subunit 6A	seq.23665.35	OID31200	1	0.0133151	0.0136977	N	N	0.0717275	0.0611819	-0.0770758	0.00319948	4.35757	0.225352	N	N	-0.053671	0.00923722	0.0628688	0.0349706	2.4179	0.490311	NA	NA	NA	NA	NA	NA	NA	NA
Q96HC4	PDLI5	PDZ and LIM domain protein 5	seq.23703.8	OID31063	1	0.750216	0.7832	N	N	0.776967	0.700181	0.775528	0.728047	7.25288	0.0642598	N	N	0.811737	0.769073	0.802179	0.73081	7.30198	0.0628708	NA	NA	NA	NA	NA	NA	NA	NA
O14523	TMM24	Transmembrane protein 24	seq.23704.11	OID20864	1	0.198306	0.219368	N	N	0.176011	0.248051	0.309391	0.149049	7.05565	0.070145	N	N	0.310035	0.18187	0.210282	0.243488	4.19087	0.241578	NA	NA	NA	NA	NA	NA	NA	NA
P01031	C5	Complement C5	seq.2381.52	OID30744	1	0.328989	0.349467	Y	N	0.349849	0.328377	0.18911	0.369263	8.32504	0.0397507	Y	N	0.219605	0.365891	0.407983	0.338219	7.8821	0.0485123	NA	NA	NA, NA, NA	NA	seq.4482.66, seq.2381.52, seq.2851.63	OID30744, OID30744, OID30744	0.349629732, 0.331827407, 0.281114251	0.390101832, 0.397098037, 0.363400771
P49593	PPM1F	Protein phosphatase 1F	seq.23923.26	OID30350	1	0.709639	0.722225	Y	N	0.732786	0.612492	0.778492	0.693545	15.3959	0.00150777	Y	N	0.79194	0.704813	0.742694	0.641322	14.6805	0.00211107	NA	NA	NA	NA	NA	NA	NA	NA
P05556	CD29	CD29	seq.23949.12	OID20376	1	-0.0642197	-0.0232701	N	N	-0.0985717	-0.13864	0.00665309	-0.0341596	3.91478	0.270814	N	N	0.0173075	-0.0079579	-0.0355612	-0.111717	2.5392	0.468249	NA	NA	0.15	NA	seq.3503.4	OID20376	0.144853	0.212422
Q9BTK6	PA1	PAXIP1-associated protein 1	seq.23967.8	OID30206	1	0.394474	0.407236	N	N	0.3587	0.416819	0.49934	0.387199	5.58217	0.133805	N	N	0.519673	0.3976	0.372668	0.418033	6.43606	0.0922186	NA	NA	NA	NA	NA	NA	NA	NA
P15085	CBPA1	Carboxypeptidase A1	seq.23981.172	OID20280	2	-0.0185446	-0.0237821	N	N	0.00520513	-0.097023	-0.0108402	0.0092381	2.17546	0.536799	N	N	0.0794901	-0.0161497	-0.00559787	-0.113506	4.70762	0.194502	NA	NA	NA	NA	NA	NA	NA	NA
Q86VR7	VS10L	V-set and immunoglobulin domain-containing protein 10-like	seq.24011.27	OID30189	1	0.0452228	0.0297802	N	N	0.0365599	0.0743048	0.0831393	0.0383403	0.6438	0.886336	Y	N	0.000321026	-0.0224513	0.130639	0.0842366	7.97426	0.0465467	NA	NA	NA	NA	NA	NA	NA	NA
Q9UNN8	sEPCR	soluble Endothelial protein C receptor	seq.24023.35	OID30149	1	0.242387	0.265085	N	N	0.224143	0.22818	0.334148	0.210904	3.86746	0.276137	N	N	0.278381	0.247738	0.294389	0.257543	0.833817	0.841363	NA	NA	NA	NA	NA	NA	NA	NA
P02649	Apo E	Apolipoprotein E	seq.2418.55	OID30727	2	0.349478	0.348356	Y	N	0.302805	0.490567	0.396892	0.360693	7.90652	0.0479836	Y	N	0.408753	0.341532	0.323984	0.495383	8.20411	0.0419765	NA	NA	NA, NA, NA, NA	NA	seq.2418.55	OID30727	0.259477	0.2512
P23560	BDNF	Brain-derived neurotrophic factor	seq.2421.7	OID30373	2	0.620895	0.650279	Y	N	0.693538	0.56005	0.650766	0.576605	14.1865	0.00266199	Y	N	0.692209	0.617943	0.697252	0.616485	8.28951	0.0403923	NA	NA	NA	NA	seq.14047.78, seq.2421.7	OID30373, OID30373	0.789284096, 0.735344621	0.792260753, 0.737748394
P35914	HMGCL	Hydroxymethylglutaryl-CoA lyase, mitochondrial	seq.24211.25	OID30214	1	0.602145	0.611822	N	N	0.626431	0.599149	0.656247	0.575326	4.44817	0.21696	N	N	0.657013	0.588714	0.629801	0.614851	3.1709	0.366019	NA	NA	NA	NA	NA	NA	NA	NA
Q9H7C9	AAMDC	Mth938 domain-containing protein	seq.24216.30	OID30236	1	0.426582	0.527784	N	N	0.428313	0.469476	0.479181	0.407977	2.27964	0.516432	N	N	0.56345	0.530214	0.531579	0.531092	0.512184	0.916207	NA	NA	NA	NA	NA	NA	NA	NA
P54284	CACB3	Voltage-dependent L-type calcium channel subunit beta-3	seq.24237.115	OID31039	1	0.557852	0.623936	Y	Y	0.614564	0.499829	0.710192	0.510313	26.7015	6.79957e-06	Y	N	0.736103	0.586697	0.669125	0.587682	18.4674	0.00035225	NA	NA	NA	NA	NA	NA	NA	NA
Q96NA2	RILP	Rab-interacting lysosomal protein	seq.24244.81	OID21436	1	0.823172	0.840932	Y	N	0.869856	0.76976	0.784809	0.807782	21.5226	8.19863e-05	Y	N	0.804705	0.832085	0.873938	0.797724	14.472	0.00232823	NA	NA	NA	NA	NA	NA	NA	NA
Q9Y6I3	EPN1	Epsin-1	seq.24255.38	OID31252	1	0.149149	0.150797	N	N	0.141455	0.169011	0.223023	0.13534	1.87056	0.599703	N	N	0.216958	0.13693	0.147511	0.177641	1.59497	0.660531	NA	NA	NA	NA	NA	NA	NA	NA
Q16625	OCLN	Occludin	seq.24263.6	OID31069	1	-0.0769855	0.0904149	N	N	-0.051717	-0.00494129	-0.099241	-0.11254	2.73253	0.434727	N	N	-0.0141042	0.121798	0.07277	0.109271	4.16785	0.2439	NA	NA	NA	NA	NA	NA	NA	NA
P22307	NLTP:isoform 6	Nonspecific lipid-transfer protein:isoform 6	seq.24293.39	OID21161	2	0.10615	0.110811	N	N	0.127797	0.112195	0.152018	0.08567	1.20456	0.751911	N	N	0.150959	0.0908835	0.130087	0.115438	1.00652	0.799675	NA	NA	NA	NA	NA	NA	NA	NA
Q2WEN9	CEA16	Carcinoembryonic antigen-related cell adhesion molecule 16	seq.24299.1	OID31495	1	0.16249	0.142677	N	N	0.155519	0.139735	0.228804	0.155093	1.49768	0.682807	N	N	0.204991	0.130865	0.150649	0.060466	2.82811	0.418893	NA	NA	NA	NA	NA	NA	NA	NA
Q9BSW2	EFC4B	EF-hand calcium-binding domain-containing protein 4B	seq.24304.3	OID21249	1	-0.201392	0.22057	Y	N	-0.223235	-0.111359	-0.0876689	-0.247143	8.04907	0.0450084	N	N	0.218804	0.231409	0.258543	0.166239	1.43951	0.6963	NA	NA	NA	NA	NA	NA	NA	NA
Q9H2A7	CXCL16, soluble	C-X-C motif chemokine 16	seq.2436.49	OID20282	1	0.702758	0.768317	Y	Y	0.753066	0.578676	0.567194	0.639665	26.2803	8.33161e-06	Y	Y	0.698788	0.7056	0.82108	0.657887	31.2702	7.45653e-07	0.701	0.774	0.7	0.78	seq.2436.49	OID20282	0.532723	0.592474
Q15276	RABE1	Rab GTPase-binding effector protein 1	seq.24417.22	OID30647	1	0.76375	0.77875	Y	N	0.796785	0.684466	0.740032	0.751198	10.1323	0.0174746	Y	N	0.75275	0.767372	0.808664	0.719379	8.07083	0.0445703	NA	NA	NA	NA	NA	NA	NA	NA
P56192	SYMC	Methionyl-tRNA synthetase, cytoplasmic	seq.24425.8	OID30658	1	0.767173	0.790042	N	N	0.764281	0.715696	0.793471	0.757973	4.18891	0.241775	N	N	0.813702	0.782705	0.784639	0.746102	3.77534	0.286767	NA	NA	NA	NA	NA	NA	NA	NA
P35221	CTNA1	Catenin alpha-1	seq.24426.15	OID30800	1	0.0159812	0.0318587	N	N	-0.0661407	-0.0298631	0.0615485	0.0381149	4.36585	0.224573	N	N	0.0821481	0.0425515	-0.0297747	-0.00310209	2.6766	0.444219	NA	NA	NA	NA	NA	NA	NA	NA
P35221	CTNA1	Catenin alpha-1	seq.24426.191	OID30800	2	-0.0210538	0.020124	N	N	-0.0028424	-0.111202	-0.0204899	-0.0204102	1.94057	0.584832	N	N	0.0357939	0.0120089	0.058144	-0.0698556	2.58419	0.460268	NA	NA	NA	NA	NA	NA	NA	NA
Q05193	Dynamin	Dynamin-1	seq.24435.1	OID31458	1	0.792654	0.800862	Y	N	0.826912	0.740417	0.768956	0.781377	9.38134	0.0246278	Y	N	0.780636	0.786436	0.835414	0.748467	10.279	0.0163378	NA	NA	NA	NA	NA	NA	NA	NA
Q15014	MO4L2	Mortality factor 4-like protein 2	seq.24443.8	OID31160	1	-0.00278963	0.0514197	N	N	-0.00518815	0.0190173	0.0198205	-0.0155776	0.402335	0.93976	N	N	0.00473684	0.0635982	0.0419913	0.0850132	1.03412	0.792996	NA	NA	NA	NA	NA	NA	NA	NA
P35606	COPB2	Coatomer subunit beta'	seq.24459.15	OID30173	1	0.363122	0.36863	Y	N	0.45439	0.306051	0.371737	0.309278	9.43896	0.0239897	Y	N	0.376314	0.311142	0.466198	0.328394	10.4078	0.0153996	NA	NA	NA	NA	NA	NA	NA	NA
Q6QNY0	BL1S3	Biogenesis of lysosome-related organelles complex 1 subunit 3	seq.24487.95	OID31106	1	-0.0814765	0.190097	N	N	-0.149749	0.00359432	-0.0650972	-0.0681202	3.96826	0.264912	N	N	0.220129	0.208492	0.147485	0.220332	1.56553	0.66723	NA	NA	NA	NA	NA	NA	NA	NA
P21549	SPYA	Serine--pyruvate aminotransferase	seq.24646.47	OID20139	1	0.508641	0.548438	N	N	0.544604	0.532323	0.513887	0.495151	1.53211	0.674879	N	N	0.548686	0.53371	0.564224	0.525457	0.721292	0.868185	NA	NA	NA	NA	NA	NA	NA	NA
Q969X0	RIPL2	RILP-like protein 2	seq.24655.23	OID30342	1	0.830862	0.849618	Y	N	0.844802	0.759974	0.837165	0.818485	9.53463	0.0229658	Y	N	0.853215	0.838689	0.862524	0.789047	8.78017	0.0323611	NA	NA	NA	NA	NA	NA	NA	NA
P78556	MIP-3a	C-C motif chemokine 20	seq.2468.62	OID20671	1	0.0265991	0.153845	N	N	0.0727684	0.0384005	0.0108235	0.00683672	1.40017	0.705496	N	N	0.054385	0.123135	0.188189	0.149993	3.28488	0.349752	-0.043	0.056	0.04	0.13	seq.2468.62	OID20671	-0.0427636	0.0868476
Q8NHV1	GIMA7	GTPase IMAP family member 7	seq.24683.11	OID30639	1	0.136285	0.224518	N	N	0.14421	0.11681	0.185431	0.0928085	2.20225	0.531506	N	N	0.24986	0.179527	0.26991	0.20061	3.18092	0.364563	NA	NA	NA	NA	NA	NA	NA	NA
Q9NPB3	CABP2	Calcium-binding protein 2	seq.24690.1	OID30916	1	-0.076884	0.0536092	N	N	-0.187636	-0.0982217	-0.0180522	-0.0530942	7.01588	0.0713932	N	N	0.123639	0.0544598	-0.00929175	0.0326643	3.11731	0.373889	NA	NA	NA	NA	NA	NA	NA	NA
O14745	NHERF	Ezrin-radixin-moesin-binding phosphoprotein 50	seq.24694.158	OID30630	1	0.734487	0.756618	N	N	0.706229	0.688693	0.771747	0.742731	5.80077	0.121716	N	N	0.781188	0.76797	0.723775	0.71975	5.44883	0.141731	NA	NA	NA	NA	NA	NA	NA	NA
P20042	eIF-2-beta	Eukaryotic translation initiation factor 2 subunit 2	seq.24723.58	OID30270	1	0.682557	0.693428	Y	N	0.741427	0.62932	0.698279	0.646034	12.2426	0.00659663	N	N	0.697822	0.664816	0.739671	0.657392	7.38323	0.060636	NA	NA	NA	NA	NA	NA	NA	NA
P02743	SAP	Serum amyloid P-component	seq.2474.54	OID30778	1	0.717496	0.728479	Y	N	0.663084	0.621771	0.750217	0.726544	12.1616	0.00684966	Y	N	0.746589	0.735793	0.686273	0.646799	8.1471	0.0430675	NA	NA	NA	NA	seq.2474.54	OID30778	0.720084	0.7542
P10721	SCF sR	Mast/stem cell growth factor receptor Kit	seq.2475.1	OID20370	1	0.725906	0.717583	N	N	0.684295	0.65316	0.648138	0.651676	1.20333	0.752206	N	N	0.65137	0.625724	0.697348	0.660021	4.91774	0.177921	0.653	0.623	0.74	0.65	seq.2475.1	OID20370	0.555983	0.483685
P35625	TIMP-3	Metalloproteinase inhibitor 3	seq.2480.58	OID20684	1	0.555766	0.59574	N	N	0.500937	0.489859	0.616172	0.564449	6.73164	0.0809615	Y	N	0.651825	0.610345	0.508144	0.540481	10.8958	0.0123028	NA	NA	0.53	NA	seq.2480.58	OID20684	0.648943	0.686234
Q9H6S3	ES8L2	Epidermal growth factor receptor kinase substrate 8-like protein 2	seq.24891.54	OID21397	1	0.582422	0.639601	Y	N	0.483943	0.6134	0.647492	0.604927	12.8986	0.00486107	N	N	0.657016	0.640692	0.589837	0.6954	5.36308	0.147061	NA	NA	NA	NA	NA	NA	NA	NA
Q9NZT2	OGFR	Opioid growth factor receptor	seq.24934.96	OID21360	1	0.541239	0.664539	N	N	0.562958	0.511889	0.569116	0.498344	3.64559	0.302365	N	N	0.662045	0.641909	0.706513	0.611672	5.71759	0.126188	NA	NA	NA	NA	NA	NA	NA	NA
P63010	AP2B1	AP-2 complex subunit beta-1	seq.24938.7	OID30949	1	0.316263	0.312615	N	N	0.317385	0.3146	0.358082	0.29607	1.04399	0.790608	N	N	0.360344	0.293422	0.306781	0.328139	1.29062	0.731362	NA	NA	NA	NA	NA	NA	NA	NA
Q9BW04	SARG	Specifically androgen-regulated gene protein	seq.24950.21	OID30331	1	0.802963	0.81429	Y	N	0.831882	0.772237	0.82856	0.78503	8.62472	0.0347199	Y	N	0.847436	0.796368	0.839425	0.786125	9.75832	0.0207363	NA	NA	NA	NA	NA	NA	NA	NA
Q9Y6X8	ZHX2	Zinc fingers and homeoboxes protein 2	seq.24955.116	OID31140	1	0.135775	0.380848	N	N	0.115897	0.271861	0.189584	0.0988421	6.93474	0.0740073	N	N	0.313941	0.407687	0.378558	0.356423	2.71843	0.437104	NA	NA	NA	NA	NA	NA	NA	NA
O75146	HIP1R	Huntingtin-interacting protein 1-related protein	seq.24960.48	OID31141	1	0.0903556	0.26312	Y	N	0.0518776	0.288186	0.0939394	0.0504674	11.8122	0.00805484	N	N	0.167256	0.272118	0.286894	0.361203	5.68577	0.12794	NA	NA	NA	NA	NA	NA	NA	NA
Q08174	PCDH1	Protocadherin-1	seq.24967.4	OID20614	1	0.0317829	0.0649795	N	N	0.0567159	-0.0581954	0.0548276	0.0433094	2.36203	0.500742	N	N	0.0637938	0.0842997	0.114072	-0.0631486	5.11993	0.163223	NA	NA	NA	NA	NA	NA	NA	NA
P12830	Cadherin E	Cadherin-1	seq.2501.51	OID20353	2	0.245597	0.405263	N	N	0.242769	0.196565	0.274607	0.254104	0.94424	0.814741	Y	N	0.403884	0.444089	0.350336	0.261395	9.66486	0.0216407	NA	NA	0.13	0.39	seq.18429.10	OID20353	0.165392	0.204289
P46060	RAGP1	Ran GTPase-activating protein 1	seq.25036.10	OID21203	1	-0.000414013	-0.0244045	N	N	-0.0278874	-0.0782487	0.0840529	0.0103702	3.78257	0.285921	N	N	0.0379908	-0.0135101	-0.0469353	-0.0831262	2.18314	0.535277	NA	NA	NA	NA	NA	NA	NA	NA
Q9ULA0	DNPEP	Aspartyl aminopeptidase	seq.25037.4	OID31118	1	-0.0077761	0.119178	N	N	0.00348437	0.00792849	-0.0240583	-0.0281761	0.452764	0.929139	N	N	0.105375	0.128012	0.0813944	0.0784659	0.904134	0.82443	NA	NA	NA	NA	NA	NA	NA	NA
P55809	SCOT	Succinyl-CoA:3-ketoacid-coenzyme A transferase 1, mitochondrial	seq.25043.74	OID30227	1	0.651066	0.666047	N	N	0.679416	0.566837	0.67389	0.654828	5.69301	0.12754	N	N	0.696536	0.659785	0.699435	0.593375	6.02435	0.110431	NA	NA	NA	NA	NA	NA	NA	NA
P22307	NLTP:isoform SCPx	Nonspecific lipid-transfer protein:isoform SCPx	seq.25049.8	OID21161	1	0.107152	0.111187	N	N	0.130768	0.101169	0.149159	0.0896437	1.04156	0.791196	N	N	0.148098	0.0933224	0.132398	0.108128	0.893383	0.827024	NA	NA	NA	NA	NA	NA	NA	NA
O60609	GFRa-3	GDNF family receptor alpha-3	seq.2505.49	OID20933	1	-0.0532351	-0.0333718	N	N	-0.00620481	-0.0408007	-0.0400774	-0.0381515	0.360643	0.948247	N	N	-0.0285027	-0.0417623	0.024257	-0.0354867	1.34723	0.717949	-0.049	-0.068	0.02	NA	seq.2505.49	OID20933	-0.0419427	-0.00716149
O43707	ACTN4	Alpha-actinin-4	seq.25057.2	OID20435	1	0.0775718	0.10671	N	N	0.0949713	0.0539116	0.083427	0.0760491	0.271371	0.96532	N	N	0.0998209	0.127869	0.0902146	0.0983086	0.538554	0.910343	NA	NA	NA	NA	NA	NA	NA	NA
Q5W0V3	F16B1	Protein FAM160B1	seq.25081.6	OID30187	1	0.099469	0.103791	N	N	0.15619	0.0393685	0.100671	0.0725232	2.8727	0.411672	N	N	0.0998273	0.0778534	0.154222	0.061001	2.12456	0.54696	NA	NA	NA	NA	NA	NA	NA	NA
O00401	WASL	Neural Wiskott-Aldrich syndrome protein	seq.25082.3	OID30467	1	0.00543785	-0.00169917	N	N	0.0685433	0.0553505	0.0623063	-0.037138	4.78303	0.188392	N	N	0.0365917	-0.0296435	0.0366796	0.112543	4.38123	0.223132	NA	NA	NA	NA	NA	NA	NA	NA
Q9BZE9	ASPC1	Tether containing UBX domain for GLUT4	seq.25085.37	OID31055	1	0.665149	0.693481	Y	N	0.692646	0.554187	0.717925	0.643148	12.1521	0.00687992	Y	N	0.726047	0.683819	0.708916	0.595996	8.00129	0.045985	NA	NA	NA	NA	NA	NA	NA	NA
Q92499	DDX1	ATP-dependent RNA helicase DDX1	seq.25092.32	OID31518	1	0.130043	0.14187	N	N	0.12322	0.10921	0.113954	0.139665	0.280539	0.963646	N	N	0.116623	0.144474	0.157	0.131257	0.318315	0.956548	NA	NA	NA	NA	NA	NA	NA	NA
Q14324	MYPC2	Myosin-binding protein C, fast-type	seq.25096.58	OID30199	1	0.394774	0.33288	Y	N	0.534212	0.259228	0.29882	0.364765	23.3981	3.33573e-05	Y	N	0.249828	0.314553	0.441504	0.210816	13.5959	0.00351018	NA	NA	NA	NA	NA	NA	NA	NA
Q8IY22	CMIP	C-Maf-inducing protein	seq.25100.11	OID31406	1	0.664339	0.688282	Y	N	0.714481	0.574713	0.734728	0.636376	16.3035	0.000982551	Y	N	0.753424	0.664401	0.731631	0.62482	13.0442	0.00454197	NA	NA	NA	NA	NA	NA	NA	NA
Q5VIR6	VPS53	Vacuolar protein sorting-associated protein 53 homolog	seq.25103.45	OID21281	1	0.718397	0.734552	N	N	0.715323	0.665407	0.778657	0.713932	7.64655	0.0539102	N	N	0.786683	0.735709	0.723031	0.696265	5.86491	0.118371	NA	NA	NA	NA	NA	NA	NA	NA
O00451	GFRa-2	GDNF family receptor alpha-2	seq.2515.14	OID21330	1	0.585081	0.592551	Y	N	0.605196	0.497575	0.489555	0.610559	10.2631	0.0164568	N	N	0.486652	0.605658	0.60558	0.564681	6.85731	0.0765877	0.58	0.604	0.51	NA	seq.2515.14	OID21330	0.49312	0.587363
O00585	6Ckine	C-C motif chemokine 21	seq.2516.57	OID20686	1	0.667018	0.661965	Y	N	0.707627	0.691488	0.528868	0.651604	15.7371	0.00128375	Y	N	0.519522	0.647335	0.709535	0.67916	16.9261	0.00073191	0.796	0.816	0.71	NA	seq.2516.57	OID20686	0.435707	0.512943
P62072	TIM10	Mitochondrial import inner membrane translocase subunit Tim10	seq.25215.1	OID30358	1	0.513394	0.538481	Y	N	0.552266	0.396737	0.653464	0.454337	24.076	2.40837e-05	Y	N	0.654327	0.487299	0.579122	0.433346	19.1063	0.000259902	NA	NA	NA	NA	NA	NA	NA	NA
Q16864	VATF	V-type proton ATPase subunit F	seq.25219.17	OID20843	1	0.104627	0.194285	N	N	0.0824805	0.0862327	0.21058	0.0851921	3.8943	0.273106	N	N	0.287554	0.193208	0.148385	0.162859	3.9064	0.27175	NA	NA	NA	NA	NA	NA	NA	NA
P13501	RANTES	C-C motif chemokine 5	seq.2523.31	OID20412	2	0.827865	0.843042	Y	N	0.841477	0.738974	0.818111	0.829841	12.8655	0.00493671	Y	N	0.842031	0.844051	0.849602	0.772615	9.18468	0.0269336	NA	NA	0.61	0.9	seq.5480.49	OID20412	0.699997	0.716617
Q9NZN3	EHD3	EH domain-containing protein 3	seq.25232.4	OID30229	1	0.793553	0.803705	Y	N	0.829126	0.744037	0.765029	0.786756	9.67739	0.0215172	Y	N	0.77653	0.79896	0.835451	0.749615	9.73174	0.0209896	NA	NA	NA	NA	NA	NA	NA	NA
P34949	MPI	Mannose-6-phosphate isomerase	seq.25233.2	OID21288	1	0.601297	0.652404	N	N	0.617616	0.515816	0.625994	0.560688	5.62238	0.1315	N	N	0.675388	0.618407	0.668069	0.577588	5.39798	0.144869	NA	NA	NA	NA	NA	NA	NA	NA
P49757	NUMB	Protein numb homolog	seq.25248.28	OID30568	1	0.710755	0.733861	Y	N	0.656893	0.627971	0.729873	0.738911	13.3095	0.00401287	Y	N	0.752312	0.758721	0.685143	0.661394	12.1426	0.00691026	NA	NA	NA	NA	NA	NA	NA	NA
Q765P7	MTSSL	MTSS1-like protein	seq.25252.29	OID31409	1	0.687901	0.695604	Y	N	0.715739	0.579052	0.694667	0.686016	8.83642	0.0315468	Y	N	0.716004	0.692926	0.723655	0.596774	8.47503	0.0371496	NA	NA	NA	NA	NA	NA	NA	NA
Q92835	SHIP	SHIP	seq.25264.102	OID30259	1	0.635304	0.664656	Y	N	0.652723	0.498828	0.665124	0.631314	10.1701	0.0171742	Y	N	0.68462	0.675399	0.662103	0.537909	9.64562	0.0218316	NA	NA	NA	NA	NA	NA	NA	NA
Q9H251	CAD23	Cadherin-23	seq.25272.17	OID31074	1	-0.0292903	-0.0534963	N	N	0.0227165	0.041408	0.0605096	-0.0844489	7.32967	0.0621004	Y	N	0.0657219	-0.123073	0.0319661	0.0098474	12.4274	0.00605358	NA	NA	NA	NA	NA	NA	NA	NA
Q5R372	RBG1L	Rab GTPase-activating protein 1-like	seq.25286.33	OID20447	1	0.66261	0.667419	Y	N	0.662147	0.584716	0.764108	0.649724	16.1026	0.00108034	Y	N	0.770168	0.65953	0.64913	0.596037	16.4901	0.00089958	NA	NA	NA	NA	NA	NA	NA	NA
Q04637	IF4G1	Eukaryotic translation initiation factor 4 gamma 1	seq.25287.7	OID20625	1	0.762044	0.776167	Y	N	0.819087	0.717305	0.773607	0.725589	18.5808	0.00033376	Y	N	0.780117	0.74467	0.825137	0.734659	15.1228	0.00171463	NA	NA	NA	NA	NA	NA	NA	NA
Q6UWW8	EST3	Carboxylesterase 3	seq.25292.4	OID21340	2	-0.00205497	0.00395423	N	N	-0.0362662	0.00493567	0.114464	-0.0216677	4.63428	0.200621	N	N	0.105969	-0.011228	-0.0411378	0.0101146	3.97533	0.26414	NA	NA	NA	NA	NA	NA	NA	NA
Q6UWW8	EST3	Carboxylesterase 3	seq.25292.6	OID21340	1	0.0454226	0.0626209	N	N	0.004115	0.10188	-0.00462106	0.0706873	2.75582	0.430824	N	N	0.0461589	0.0831988	-0.00312583	0.0990714	2.65559	0.447828	NA	NA	NA	NA	NA	NA	NA	NA
Q4VCS5	AMOT	Angiomotin	seq.25296.3	OID30572	1	-0.0194107	0.0488503	Y	N	0.127771	0.0203181	-0.0473707	-0.0324325	8.73199	0.0330749	N	N	-0.0120996	0.0417129	0.0986772	0.138554	3.83735	0.279572	NA	NA	NA	NA	NA	NA	NA	NA
Q8IV38	ANKY2	Ankyrin repeat and MYND domain-containing protein 2	seq.25437.18	OID30518	1	-0.103693	0.272684	N	N	-0.0977333	-0.149491	-0.00492847	-0.151499	5.04466	0.168556	N	N	0.338664	0.241235	0.277779	0.294188	2.64458	0.449727	NA	NA	NA	NA	NA	NA	NA	NA
Q5TDH0	DDI2	Protein DDI1 homolog 2	seq.25446.34	OID30602	1	0.587597	0.610032	Y	N	0.673249	0.569413	0.482954	0.574964	15.3173	0.00156463	Y	N	0.495244	0.59639	0.687563	0.619677	15.8977	0.00119007	NA	NA	NA	NA	NA	NA	NA	NA
P46937	YAP1	Transcriptional coactivator YAP1	seq.25451.39	OID31113	1	0.25967	0.334457	N	N	0.287743	0.191239	0.227561	0.252734	1.75555	0.624655	N	N	0.257613	0.328847	0.401859	0.316097	4.73426	0.192322	NA	NA	NA	NA	NA	NA	NA	NA
P10523	ARRS	S-arrestin	seq.25461.3	OID30874	1	0.0265332	0.0279779	N	N	0.0311143	-0.0212385	0.0403045	0.0425665	0.770595	0.856487	N	N	0.0552434	0.0109279	0.0550775	0.0272467	0.792781	0.851193	NA	NA	NA	NA	NA	NA	NA	NA
P48436	SOX-9	SOX-9	seq.25468.5	OID30905	1	-0.0151143	0.0225995	N	N	-0.100052	-0.040534	0.0346358	0.0160293	4.90443	0.17893	N	N	0.0542192	0.0349924	-0.00122699	-0.0441802	1.66897	0.643855	NA	NA	NA	NA	NA	NA	NA	NA
P49354	FNTA	Protein farnesyltransferase/geranylgeranyltransferase type-1 subunit alpha	seq.25473.62	OID31381	1	0.289258	0.367047	N	N	0.258456	0.177941	0.380533	0.309631	6.99239	0.0721406	N	N	0.467334	0.377079	0.318766	0.294724	6.992	0.0721532	NA	NA	NA	NA	NA	NA	NA	NA
Q9BSL1	UBAC1	Ubiquitin-associated domain-containing protein 1	seq.25480.21	OID21336	1	0.545174	0.58768	Y	N	0.626161	0.46675	0.42044	0.547462	16.4391	0.000921562	Y	N	0.485421	0.594589	0.64614	0.49735	13.2784	0.00407159	NA	NA	NA	NA	NA	NA	NA	NA
Q9UBB4	ATX10	Ataxin-10	seq.25481.66	OID20865	1	0.0369489	0.262147	N	N	0.0580691	-0.0218695	0.114537	0.0459709	2.37991	0.497385	N	N	0.344104	0.267778	0.305081	0.188807	3.99714	0.261773	NA	NA	NA	NA	NA	NA	NA	NA
O94830	DDHD2	Phospholipase DDHD2	seq.25499.37	OID31043	1	0.324271	0.449473	N	N	0.279169	0.281421	0.397054	0.336717	3.67853	0.298335	N	N	0.508389	0.456118	0.422253	0.453882	2.0425	0.563634	NA	NA	NA	NA	NA	NA	NA	NA
O75154	RFIP3	Rab11 family-interacting protein 3	seq.25500.6	OID30325	1	0.759974	0.77092	Y	N	0.783978	0.673268	0.766018	0.75366	8.81594	0.0318408	N	N	0.770566	0.767804	0.786715	0.726602	2.99934	0.391727	NA	NA	NA	NA	NA	NA	NA	NA
P01189	b-Endorphin	Beta-endorphin	seq.2558.51	OID30282	3	0.00819997	0.110013	N	N	0.0495858	0.116395	0.0203398	-0.0236611	4.29159	0.23165	N	N	0.0687345	0.0866928	0.111234	0.111971	0.433156	0.933311	NA	NA	NA, NA, NA	NA	seq.2558.51, seq.4890.10, seq.9204.33	OID30282, OID30282, OID30282	0.008108985, 0.047003615, 0.594896786	-0.019351925, 0.001235578, 0.535754975
P05156	Factor I	Complement factor I	seq.2567.5	OID30772	1	0.493118	0.552476	Y	N	0.518647	0.527314	0.360096	0.465776	8.00938	0.0458183	N	N	0.452887	0.531489	0.573564	0.538321	4.57943	0.205314	NA	NA	NA	NA	seq.2567.5	OID30772	0.418463	0.572606
P18065	IGFBP-2	Insulin-like growth factor-binding protein 2	seq.2570.72	OID20325	4	0.806054	0.80781	Y	N	0.753041	0.780683	0.824698	0.805887	8.03072	0.0453811	N	N	0.81162	0.812143	0.755146	0.781645	7.42247	0.0595845	NA	NA	0.88	0.87	seq.8469.41	OID20325	0.844716	0.84375
P17936	IGFBP-3	Insulin-like growth factor-binding protein 3	seq.2571.12	OID20398	1	0.612574	0.682834	Y	N	0.573527	0.730153	0.597536	0.563162	16.1532	0.00105486	N	N	0.661526	0.646777	0.684539	0.735563	5.80439	0.121525	0.642	0.68	0.69	0.71	seq.2571.12	OID20398	0.482725	0.527605
P05231	IL-6	Interleukin-6	seq.2573.20	OID20911	2	0.266565	0.355693	N	N	0.287365	0.290455	0.219084	0.239321	1.52242	0.677106	N	N	0.277025	0.348486	0.36739	0.360734	1.92726	0.58764	NA	NA	0.49, 0.49, 0.48, 0.48	0.71, 0.72	seq.4673.13, seq.4673.13, seq.4673.13, seq.4673.13	OID20101, OID20563, OID20911, OID21276	0.160205908, 0.136292988, 0.165545401, 0.159013193	0.187849434, 0.172428134, 0.195573548, 0.191886476
P05231	IL-6	Interleukin-6	seq.2573.20	OID20101	6	0.257225	0.356884	N	N	0.273258	0.283254	0.198027	0.240591	1.46369	0.690676	N	N	0.26628	0.366671	0.357059	0.32656	2.82631	0.419188	NA	NA	0.49, 0.49, 0.48, 0.48	0.71, 0.72	seq.4673.13, seq.4673.13, seq.4673.13, seq.4673.13	OID20101, OID20563, OID20911, OID21276	0.160205908, 0.136292988, 0.165545401, 0.159013193	0.187849434, 0.172428134, 0.195573548, 0.191886476
P05231	IL-6	Interleukin-6	seq.2573.20	OID20563	7	0.256425	0.355988	N	N	0.269979	0.300881	0.201965	0.233617	1.84122	0.606005	N	N	0.271378	0.353392	0.353466	0.36985	2.12315	0.547244	NA	NA	0.49, 0.49, 0.48, 0.48	0.71, 0.72	seq.4673.13, seq.4673.13, seq.4673.13, seq.4673.13	OID20101, OID20563, OID20911, OID21276	0.160205908, 0.136292988, 0.165545401, 0.159013193	0.187849434, 0.172428134, 0.195573548, 0.191886476
P05231	IL-6	Interleukin-6	seq.2573.20	OID21276	8	0.25522	0.362474	N	N	0.278401	0.289538	0.221915	0.216983	2.03626	0.564916	N	N	0.292713	0.352927	0.369309	0.366008	1.42089	0.700645	NA	NA	0.49, 0.49, 0.48, 0.48	0.71, 0.72	seq.4673.13, seq.4673.13, seq.4673.13, seq.4673.13	OID20101, OID20563, OID20911, OID21276	0.160205908, 0.136292988, 0.165545401, 0.159013193	0.187849434, 0.172428134, 0.195573548, 0.191886476
P41159	Leptin	Leptin	seq.2575.5	OID20187	2	0.863395	0.874174	Y	N	0.870287	0.811582	0.881469	0.852643	9.34901	0.0249931	Y	N	0.899113	0.863899	0.886049	0.805274	18.6492	0.000323068	NA	NA	0.95	0.96	seq.8484.24	OID20187	0.90984	0.935621
P13500	MCP-1	C-C motif chemokine 2	seq.2578.67	OID21004	1	0.262078	0.328659	N	N	0.272387	0.306108	0.328717	0.197425	5.98137	0.11252	Y	N	0.352845	0.252007	0.373395	0.397909	8.86754	0.0311048	0.223	0.2	0.41	0.41, 0.39	seq.2578.67	OID21004	0.364018	0.460432
P14780	MMP-9	Matrix metalloproteinase-9	seq.2579.17	OID21103	1	0.81051	0.824917	Y	N	0.839386	0.769763	0.841099	0.801384	9.30665	0.0254797	Y	N	0.865824	0.81362	0.849108	0.784869	12.4748	0.00592169	0.893	0.91	0.74	0.88	seq.2579.17	OID21103	0.849072	0.856738
P05164	Myeloperoxidase	Myeloperoxidase	seq.2580.83	OID21100	1	0.657152	0.71148	N	N	0.702045	0.636428	0.590725	0.641066	6.9051	0.0749847	Y	N	0.638997	0.695641	0.773523	0.681395	14.8175	0.00197945	0.819	0.859	0.75	0.8	seq.2580.83	OID21100	0.565791	0.617611
P01236	PRL	Prolactin	seq.2585.2	OID21033	1	0.796011	0.826174	Y	N	0.787292	0.801158	0.865916	0.783288	15.3985	0.00150594	Y	N	0.887963	0.821127	0.807571	0.827535	16.5144	0.000889313	NA	NA	0.85	NA	seq.2585.2	OID21033	0.802205	0.815736
Q01973	ROR1	Inactive tyrosine-protein kinase transmembrane receptor ROR1	seq.2590.69	OID20224	2	0.637836	0.752542	N	N	0.620774	0.62131	0.647737	0.615772	0.606266	0.894996	N	N	0.740505	0.749104	0.760557	0.696997	2.95831	0.398098	0.458	0.64	0.73	NA	seq.2590.69	OID20224	0.541227	0.642627
P13747	HLAE	HLA class I histocompatibility antigen, alpha chain E	seq.25918.60	OID20532	1	0.0700014	0.120333	N	N	0.0651514	0.100894	0.16186	0.0779214	1.90077	0.593255	N	N	0.197817	0.14862	0.110017	0.141121	1.37756	0.710803	NA	NA	NA	NA	NA	NA	NA	NA
P78395	PRAME	Preferentially expressed antigen of melanoma	seq.25951.17	OID31165	1	0.00302987	-0.0049451	N	N	0.0206377	-0.0933995	-0.02211	0.023185	2.81789	0.420563	N	N	-0.0596553	0.00987623	0.03935	-0.0912168	3.58983	0.309296	NA	NA	NA	NA	NA	NA	NA	NA
P01033	TIMP-1	Metalloproteinase inhibitor 1	seq.25967.34	OID20418	2	0.501525	0.644198	N	N	0.500733	0.498878	0.515799	0.480771	0.556527	0.906308	N	N	0.592484	0.655645	0.663229	0.564991	6.16591	0.103811	NA	NA	0.2	0.4	seq.2211.9	OID20418	0.0647559	0.522058
P15692	VEGF	Vascular endothelial growth factor A	seq.2597.8	OID20650	3	0.226123	0.613718	N	N	0.229282	0.261866	0.294786	0.188149	3.27153	0.351625	Y	N	0.697407	0.606017	0.607903	0.545993	8.50957	0.0365746	0.398	0.75	0.37, 0.27	0.2, 0.52, 0.18	seq.19437.61, seq.2597.8, seq.4867.15	OID20650, OID20650, OID20650	0.721923057, 0.3914258, 0.699661673	0.733495442, 0.665695416, 0.720457318
Q07011	4-1BB	Tumor necrosis factor receptor superfamily member 9	seq.2598.9	OID20985	1	0.293918	0.322778	N	N	0.238972	0.247694	0.307288	0.24966	1.05463	0.788036	N	N	0.358708	0.309243	0.329503	0.275321	1.23785	0.743942	NA	NA	0.49	0.26	seq.14025.18	OID20985	0.0953734	0.127698
P41273	4-1BB ligand	Tumor necrosis factor ligand superfamily member 9	seq.2599.51	OID30435	1	0.0126932	0.0107929	N	N	-0.0130858	-0.0472357	-0.00583894	0.0350576	1.62881	0.652876	N	N	0.0160385	0.0204643	0.0141269	-0.0060138	0.129257	0.988109	NA	NA	NA	NA	seq.2599.51	OID30435	-0.0391926	0.0142835
O15123	Angiopoietin-2	Angiopoietin-2	seq.2602.2	OID21463	1	0.764059	0.827169	N	N	0.761931	0.730396	0.733495	0.752777	1.17259	0.759585	N	N	0.792637	0.822911	0.830577	0.77966	4.79898	0.187122	0.707	0.804	0.76	NA	seq.2602.2	OID21463	0.748967	0.801108
P33681	B7	T-lymphocyte activation antigen CD80	seq.2603.61	OID30291	1	0.047287	0.0972215	N	N	0.085699	-0.0571993	0.129162	0.0274003	5.3772	0.146171	N	N	0.149736	0.0708145	0.123423	0.0591441	2.05359	0.561359	NA	NA	NA	NA	seq.13726.4	OID30291	0.0533211	0.0916026
P28908	CD30	Tumor necrosis factor receptor superfamily member 8	seq.2605.49	OID21049	1	0.10464	0.139178	N	N	0.228002	0.107878	0.0756727	0.096234	6.48014	0.0904489	N	N	0.0982107	0.129138	0.25649	0.140593	6.51885	0.0889219	NA	NA	0.6	NA	seq.2605.49	OID21049	0.177618	0.162791
P01034	Cystatin C	Cystatin-C	seq.2609.59	OID20400	1	0.67522	0.701075	N	N	0.696048	0.592233	0.665161	0.684553	5.4578	0.141184	Y	N	0.684939	0.712286	0.734429	0.57263	13.6075	0.0034911	0.561	0.669	0.75	0.7	seq.2609.59	OID20400	0.585753	0.596613
Q06418	Dtk	Tyrosine-protein kinase receptor TYRO3	seq.2611.72	OID20161	1	0.187846	0.213734	N	N	0.219038	0.154287	0.168337	0.218445	1.29748	0.729733	N	N	0.212845	0.2179	0.255066	0.139206	2.18764	0.534386	0.208	0.189	0.18	NA	seq.2611.72	OID20161	0.309824	0.220001
P55010	eIF-5	Eukaryotic translation initiation factor 5	seq.2612.5	OID30156	1	0.310358	0.339967	N	N	0.343607	0.234035	0.279765	0.301315	2.31934	0.508826	N	N	0.322837	0.329063	0.366507	0.287914	1.25532	0.73977	NA	NA	NA	NA	seq.2612.5	OID30156	0.356606	0.477963
P52798	Ephrin-A4	Ephrin-A4	seq.2614.28	OID20935	1	0.408137	0.477639	N	N	0.393515	0.41264	0.380208	0.373344	0.469295	0.925584	N	N	0.415642	0.472537	0.497461	0.412772	2.8403	0.416909	0.2	0.447	0.59	NA	seq.2614.28	OID20935	0.45255	0.525356
P04626	ERBB2	Receptor tyrosine-protein kinase erbB-2	seq.2616.23	OID21520	1	-0.0389194	0.06771	N	N	0.0229213	-0.0178578	-0.0549992	-0.0703757	2.7705	0.428379	N	N	0.0308366	0.0469279	0.0921416	0.0282765	0.984814	0.804926	0.108	0.27	0.02	NA	seq.2616.23	OID21520	-0.0389159	0.0566351
P21860	ERBB3	Receptor tyrosine-protein kinase erbB-3	seq.2617.56	OID20705	1	0.498732	0.645894	N	N	0.453281	0.586934	0.482478	0.501686	5.22996	0.155712	N	N	0.627761	0.648785	0.62271	0.665849	1.12924	0.770019	0.169	0.675	0.52	NA	seq.2617.56	OID20705	0.341194	0.506248
Q15303	ERBB4	Receptor tyrosine-protein kinase erbB-4	seq.2618.10	OID21510	1	0.00118914	0.0447051	N	N	-0.0526614	0.0341215	-0.00176142	0.000829548	1.35997	0.714944	N	N	0.0426776	-0.0042419	0.0389255	0.0148999	0.806838	0.847831	-0.062	0.041	-0.07	NA	seq.2618.10	OID21510	-0.0161279	0.0107215
P09758	GA733-1 protein	Tumor-associated calcium signal transducer 2	seq.2619.72	OID21447	2	-0.0686258	-0.0344864	N	N	-0.0930614	-0.0464726	0.0368067	-0.0680118	3.12643	0.37254	N	N	0.021135	-0.041619	0.00855036	-0.0323269	1.29203	0.731027	0.062	0.039	-0.01	NA	seq.14034.22, seq.2619.72	OID21447, OID21447	-0.035366178, -0.061720262	-0.049955549, -0.067102767
P40189	gp130, soluble	Interleukin-6 receptor subunit beta	seq.2620.4	OID20147	1	0.470345	0.581073	N	N	0.479267	0.49227	0.516776	0.430265	3.45753	0.326312	Y	N	0.612581	0.539519	0.642689	0.511892	10.286	0.0162849	NA	NA	0.46	NA	seq.2620.4	OID20147	0.308603	0.411698
P30519	HO-2	Heme oxygenase 2	seq.2622.18	OID20887	1	0.200228	0.352885	N	N	0.276491	0.129571	0.190626	0.172208	4.8072	0.186472	N	N	0.312247	0.369901	0.372245	0.233974	4.91364	0.178231	0.507	0.615	0.26	NA	seq.2622.18	OID20887	0.251957	0.389623
Q9NPH3	IL-1 R AcP	Interleukin-1 Receptor accessory protein	seq.2630.12	OID21126	2	0.765509	0.788343	Y	N	0.750405	0.738423	0.648118	0.777676	15.3524	0.00153898	Y	N	0.672575	0.788954	0.791694	0.760799	15.1144	0.00172142	NA	NA	0.78	NA	seq.14048.7	OID21126	0.742501	0.749551
Q08334	IL-10 Rb	Interleukin-10 receptor subunit beta	seq.2631.50	OID20696	1	0.217796	0.232888	N	N	0.233408	0.18387	0.104962	0.214617	3.41619	0.331796	Y	N	0.0824413	0.245634	0.270001	0.280307	7.99297	0.0461572	0.306	0.254	0.29	0.28	seq.2631.50	OID20696	0.129929	0.174526
P42701	IL-12 Rb1	Interleukin-12 receptor subunit beta-1	seq.2632.5	OID20486	2	-0.0316825	0.0764399	N	N	-0.0643181	-0.039	0.0261627	-0.00653713	1.69467	0.63812	N	N	0.110239	0.107129	0.0126111	0.0500785	3.14943	0.369156	0.168	0.169	0.08	NA	seq.2632.5	OID20486	0.0160471	0.087078
P78552	IL-13 Ra1	Interleukin-13 receptor subunit alpha-1	seq.2633.52	OID21504	1	0.383055	0.497461	N	N	0.43872	0.369617	0.442301	0.326621	7.19408	0.0659624	N	N	0.483452	0.46943	0.503864	0.502696	0.772935	0.855929	0.23	0.416	0.41	NA	seq.2633.52	OID21504	0.28625	0.386679
P31785	IL-2 sRg	Cytokine receptor common subunit gamma	seq.2634.2	OID31361	1	0.023551	0.0456827	N	N	0.0569119	0.094303	-0.0427635	0.0166887	2.8671	0.412573	N	N	-0.0203665	0.0392651	0.0933227	0.108409	3.07702	0.379903	NA	NA	NA	NA	seq.2634.2	OID31361	0.00539568	0.0193392
Q6UX15	Layilin	Layilin	seq.2635.61	OID20970	1	0.073668	0.0530797	N	N	0.0971777	0.0409512	0.141561	0.0825773	1.37711	0.710909	N	N	0.0677377	0.0767659	0.134603	0.0204434	2.18718	0.534478	0.215	0.076	0.65	NA	seq.2635.61	OID20970	0.232848	0.160178
P36941	Lymphotoxin b R	Tumor necrosis factor receptor superfamily member 3	seq.2636.10	OID20768	1	0.00819168	0.0318555	N	N	0.0574511	-0.123035	-0.00520132	0.0390486	5.81769	0.120825	Y	N	-0.0231155	0.0752403	0.0984939	-0.0950701	7.88899	0.0483626	0.048	0.07	-0.01	-0.07	seq.2636.10	OID20768	0.0856889	0.124831
P22897	Macrophage mannose receptor	Macrophage mannose receptor 1	seq.2637.77	OID30694	1	0.579035	0.659077	N	N	0.583562	0.646158	0.552567	0.573815	3.08743	0.378341	N	N	0.615376	0.656806	0.67738	0.674062	2.13815	0.544234	NA	NA	NA	NA	seq.2637.77	OID30694	0.584625	0.654975
P07333	M-CSF R	Macrophage colony-stimulating factor 1 receptor	seq.2638.12	OID30681	2	0.775958	0.793081	N	N	0.75939	0.807383	0.709282	0.777372	7.76859	0.0510444	N	N	0.727323	0.793619	0.785453	0.81193	6.76229	0.0798729	NA	NA	NA	NA	seq.13682.47	OID30681	0.74394	0.73788
P22223	P-Cadherin	Cadherin-3	seq.2643.57	OID21008	1	-0.101465	-0.0441255	N	N	-0.177967	-0.18961	-0.0101223	-0.0870545	6.87632	0.0759462	N	N	0.021625	-0.0251063	-0.0580436	-0.159618	4.71738	0.193701	-0.083	-0.042	-0.13	NA	seq.2643.57	OID21008	-0.0575787	0.0212889
P32942	sICAM-3	Intercellular adhesion molecule 3	seq.2649.77	OID20277	1	-0.00315375	0.0993965	N	N	-0.0787595	-0.0682511	0.0335977	-0.0266542	2.44975	0.484441	N	N	0.110077	0.0768975	0.0268897	0.0507518	1.37469	0.711477	0	0.018	0	-0.04	seq.2649.77	OID20277	-0.0249529	0.0348571
Q03405	suPAR	Urokinase plasminogen activator surface receptor	seq.2652.15	OID20764	1	0.438336	0.553174	Y	Y	0.242137	0.605727	0.640729	0.474393	55.6359	5.02392e-12	Y	Y	0.715057	0.634746	0.32718	0.696146	75.1692	3.33308e-16	0.48	0.684	0.32	0.55	seq.2652.15	OID20764	0.474486	0.630037
P19438	TNF sR-I	Tumor necrosis factor receptor superfamily member 1A	seq.2654.19	OID21155	1	0.685641	0.78294	N	N	0.670118	0.665089	0.676644	0.662791	0.154319	0.984603	N	N	0.75126	0.786256	0.75877	0.762143	2.47715	0.479436	0.453	0.732	0.82	0.76	seq.2654.19	OID21155	0.618871	0.702648
Q16288	TrkC	NT-3 growth factor receptor	seq.2658.27	OID21057	1	0.542319	0.612556	N	N	0.590504	0.502046	0.512797	0.540404	3.35228	0.340432	Y	N	0.59795	0.596646	0.672339	0.520826	9.31778	0.0253511	0.44	0.682	0.62	NA	seq.2658.27	OID21057	0.469562	0.552921
Q02223	BCMA	Tumor necrosis factor receptor superfamily member 17	seq.2665.26	OID30589	1	0.752761	0.796211	N	N	0.724665	0.721912	0.758487	0.726091	1.3063	0.727637	N	N	0.791879	0.772907	0.788912	0.759751	1.31409	0.725791	NA	NA	NA	NA	seq.2665.26	OID30589	0.691112	0.764045
P07585	Bone proteoglycan II	Decorin	seq.2666.53	OID20106	1	0.157914	0.0980834	N	N	0.154118	0.119369	0.146943	0.168699	0.502283	0.918389	N	N	0.0219184	0.107471	0.12818	0.0768846	2.18908	0.534102	0.316	0.271	0.18	0.16	seq.2666.53	OID20106	-0.0882118	-0.0484807
P00533	ERBB1	Epidermal growth factor receptor	seq.2677.1	OID20319	1	0.46383	0.59179	Y	N	0.413069	0.578868	0.428254	0.464534	7.99502	0.0461148	N	N	0.615418	0.575474	0.610515	0.535668	2.68137	0.443403	0.448	0.558	0.5, 0.04	0.53, -0.08	seq.19567.1, seq.2677.1	OID20319, OID20319	0.028443775, 0.458813607	0.030149825, 0.509059791
P14210	HGF	Hepatocyte growth factor	seq.2681.23	OID20656	1	0.489382	0.562969	N	N	0.418596	0.502689	0.451911	0.502671	3.93832	0.268201	N	N	0.509336	0.577446	0.509263	0.539162	3.82563	0.280919	0.413	0.536	0.41	0.54	seq.2681.23	OID20656	0.57522	0.611079
P01024	iC3b	Complement C3b, inactivated	seq.2683.1	OID30776	3	0.334185	0.389905	N	N	0.329684	0.306898	0.397629	0.322878	1.84408	0.605391	N	N	0.445438	0.380711	0.380345	0.349113	1.88578	0.596448	NA	NA	NA, NA, NA, NA, NA, NA	NA	seq.2683.1, seq.2754.50, seq.4480.59, seq.4900.8, seq.5803.24	OID30776, OID30776, OID30776, OID30776, OID30776	0.593908615, 0.572976403, 0.607443442, 0.493561419, 0.553106561	0.625049302, 0.609416185, 0.625731643, 0.609421007, 0.594327298
P24592	IGFBP-6	Insulin-like growth factor-binding protein 6	seq.2686.67	OID20413	1	0.712286	0.757783	Y	N	0.691408	0.644717	0.771472	0.711533	9.04814	0.0286576	Y	N	0.788113	0.776767	0.738133	0.635934	17.465	0.000566968	NA	NA	0.78	0.58	seq.14088.38	OID20413	0.44247	0.606081
Q16674	MIA	Melanoma-derived growth regulatory protein	seq.2687.2	OID21531	1	0.744086	0.793081	Y	N	0.789867	0.651398	0.772851	0.697591	20.766	0.000117735	Y	Y	0.811716	0.752097	0.84572	0.693817	31.2455	7.54634e-07	0.729	0.79	0.81	NA	seq.2687.2	OID21531	0.650841	0.711458
P14555	NPS-PLA2	Phospholipase A2, membrane associated	seq.2692.74	OID20274	1	0.781788	0.78142	N	N	0.758225	0.763906	0.766593	0.769717	0.2331	0.972077	N	N	0.751537	0.769604	0.757141	0.759321	0.538821	0.910283	NA	NA	0.87	NA	seq.2692.74	OID20274	0.696327	0.672934
P13725	OSM	Oncostatin-M	seq.2693.20	OID20574	2	-0.0541152	0.0285647	N	N	-0.0181183	-0.0648706	-0.0452703	-0.0568614	0.530094	0.912232	N	N	-0.00134173	0.0473768	0.0762469	-0.00892034	1.64286	0.649712	0.119	0.203	-0.08	0.2, -0.07	seq.14063.17, seq.2693.20	OID20574, OID20574	0.422762163, 0.014876941	0.396996759, 0.100689406
P16284	PECAM-1	Platelet endothelial cell adhesion molecule	seq.2695.25	OID21131	1	-0.0329619	0.12555	N	N	-0.059317	-0.0184061	0.0201816	-0.00314017	1.33229	0.721479	N	N	0.187901	0.127937	0.130752	0.133804	0.846468	0.838323	0.115	0.383	-0.07	-0.01	seq.2695.25	OID21131	0.0306954	0.163506
O60542	Persephin	Persephin	seq.2696.87	OID20511	1	0.593341	0.474854	N	N	0.628085	0.528706	0.569408	0.606461	4.05033	0.256081	N	N	0.537882	0.477563	0.490093	0.443032	2.16635	0.538607	NA	NA	0.78	NA	seq.2696.87	OID20511	0.666083	0.421528
P02776	PF-4	Platelet factor 4	seq.2697.7	OID30764	1	0.756324	0.759892	N	N	0.795496	0.761709	0.755893	0.728918	7.70924	0.052419	N	N	0.755532	0.734111	0.796846	0.768541	7.09189	0.0690258	NA	NA	NA	NA	seq.2697.7	OID30764	0.737663	0.772395
P07225	Protein S	Vitamin K-dependent protein S	seq.2700.56	OID30737	1	0.529505	0.56634	N	N	0.521524	0.431773	0.534063	0.545915	4.20373	0.240289	N	N	0.596292	0.572221	0.572633	0.434795	7.62855	0.0543459	NA	NA	NA	NA	seq.2700.56	OID30737	0.503128	0.520195
O14836	TACI	Tumor necrosis factor receptor superfamily member 13B	seq.2704.74	OID20702	1	0.185097	0.248906	N	N	0.231765	0.184834	0.113863	0.159053	2.86423	0.413036	N	N	0.177173	0.208028	0.297673	0.263639	3.9276	0.269389	0.149	0.151	0.37	0.33	seq.2704.74	OID20702	0.0981994	0.160165
O15444	TECK	C-C motif chemokine 25	seq.2705.5	OID20674	2	0.455385	0.476391	Y	N	0.541685	0.419468	0.492921	0.384843	13.359	0.0039212	Y	N	0.513633	0.409021	0.573583	0.389628	17.248	0.000628413	0.172	0.156	0.58	0.34	seq.2705.5	OID20674	0.370234	0.381574
P05543	Thyroxine-Binding Globulin	Thyroxine-binding globulin	seq.2706.69	OID30724	1	0.619829	0.588154	N	N	0.586962	0.562718	0.620935	0.652131	5.64559	0.130186	Y	N	0.526114	0.625991	0.572499	0.489871	10.174	0.0171436	0.61	0.708	NA	0.59	seq.2706.69	OID30724	0.40341	0.493101
Q99062	G-CSF-R	Granulocyte colony-stimulating factor receptor	seq.2719.3	OID30527	1	0.0361771	0.0964958	N	N	0.00790565	0.169279	-0.0339387	0.00989967	6.13744	0.105112	Y	N	0.016941	0.0849194	0.0463496	0.253537	8.82717	0.0316793	NA	NA	NA	NA	seq.2719.3	OID30527	-0.0344923	0.0580334
P24821	Tenascin	Tenascin	seq.2728.62	OID20359	8	-0.0162426	0.020313	N	N	0.00358202	0.0204479	0.0954838	-0.0172851	2.7525	0.431378	N	N	0.101847	0.0442756	0.0526071	0.0258139	0.902014	0.824942	NA	NA	0.6	0.18, 0.55, 0.54, 0.65, 0.64, 0.61, 0.03, 0.48	seq.4155.3	OID20359	0.369701	0.390805
P48745	NovH	Protein NOV homolog	seq.2737.22	OID20299	1	0.0166371	0.0753736	N	N	0.00638512	-0.105261	0.0998855	0.021115	5.37372	0.14639	N	N	0.129028	0.0936635	0.059897	0.00227765	2.41228	0.491353	0.073	0.052	-0.03	NA	seq.2737.22	OID20299	0.032867	0.0810839
O43699	Siglec-6	Sialic acid-binding Ig-like lectin 6	seq.2741.22	OID21394	1	0.337565	0.348527	N	N	0.412241	0.319801	0.424352	0.324351	5.22937	0.155751	N	N	0.41893	0.329955	0.404539	0.38321	3.6283	0.304499	0.294	0.335	0.45	NA	seq.2741.22	OID21394	0.302908	0.356281
Q9Y286	Siglec-7	Sialic acid-binding Ig-like lectin 7	seq.2742.68	OID20190	1	0.657552	0.73219	Y	N	0.706193	0.677522	0.690359	0.611249	10.4994	0.014765	Y	N	0.773983	0.693732	0.779936	0.705229	14.4012	0.00240696	0.688	0.748	0.69	NA	seq.2742.68	OID20190	0.500731	0.606967
Q15465	Sonic Hedgehog	Sonic hedgehog protein	seq.2743.5	OID30516	1	0.0089472	0.0162568	N	N	0.0357473	-0.0891419	0.0210832	0.0114355	2.55028	0.466273	N	N	0.031178	0.0117499	0.0575888	-0.0798465	2.93181	0.402259	NA	NA	NA	NA	seq.2743.5	OID30516	-0.140868	-0.109506
P02647	Apo A-I	Apolipoprotein A-I	seq.2750.3	OID30769	1	0.0620492	0.0882203	N	N	0.0758054	0.103994	0.0510461	0.0373544	1.03795	0.792071	N	N	0.0465321	0.068846	0.115204	0.143684	1.86819	0.600209	NA	NA	NA	NA	seq.2750.3	OID30769	-0.00673938	-0.0192087
P20160	Azurocidin	Azurocidin	seq.2751.16	OID20309	1	0.261898	0.389371	N	N	0.211523	0.26639	0.293892	0.27728	1.83033	0.608357	N	N	0.357206	0.402957	0.39496	0.342033	1.31429	0.725742	NA	NA	0.22	0.01	seq.14713.46	OID20309	-0.000733232	0.269961
P01024	C3	Complement C3	seq.2754.50	OID30776	2	0.340256	0.39558	N	N	0.26339	0.239197	0.354728	0.336116	3.95166	0.266732	N	N	0.40851	0.396796	0.319434	0.287899	4.85217	0.182948	NA	NA	NA, NA, NA, NA, NA, NA	NA	seq.2683.1, seq.2754.50, seq.4480.59, seq.4900.8, seq.5803.24	OID30776, OID30776, OID30776, OID30776, OID30776	0.593908615, 0.572976403, 0.607443442, 0.493561419, 0.553106561	0.625049302, 0.609416185, 0.625731643, 0.609421007, 0.594327298
P01024	C3adesArg	C3a anaphylatoxin des Arginine	seq.2755.8	OID30776	5	0.241264	0.326448	N	N	0.145542	0.152875	0.266837	0.230848	4.1585	0.24485	N	N	0.345981	0.327153	0.234179	0.21565	5.58262	0.13378	NA	NA	NA, NA, NA, NA, NA, NA	NA	seq.2683.1, seq.2754.50, seq.4480.59, seq.4900.8, seq.5803.24	OID30776, OID30776, OID30776, OID30776, OID30776	0.593908615, 0.572976403, 0.607443442, 0.493561419, 0.553106561	0.625049302, 0.609416185, 0.625731643, 0.609421007, 0.594327298
O95750	FGF-19	Fibroblast growth factor 19	seq.2762.30	OID20715	1	0.882811	0.896024	Y	Y	0.895697	0.881988	0.9361	0.860011	37.3634	3.85469e-08	Y	Y	0.948285	0.875816	0.910171	0.886579	46.7932	3.84609e-10	NA	NA	0.91	0.94	seq.13724.27	OID20715	0.88276	0.901266
Q9NP95	FGF-20	Fibroblast growth factor 20	seq.2763.66	OID30459	1	0.0117085	0.0124539	N	N	0.0292318	-0.0455889	0.0024595	0.0180518	0.942299	0.81521	N	N	-0.0103847	0.00848381	0.0551855	0.0618759	1.30182	0.728701	NA	NA	NA	NA	seq.2763.66	OID30459	-0.00162297	-0.0555139
P08833	IGFBP-1	Insulin-like growth factor-binding protein 1	seq.2771.35	OID20246	2	0.816863	0.832968	Y	N	0.766328	0.813527	0.84145	0.813267	8.55657	0.0358061	Y	N	0.866531	0.832778	0.782434	0.819978	12.8497	0.00497311	0.851	0.895	0.89	0.79	seq.2771.35	OID20246	0.890732	0.908036
P22301	IL-10	Interleukin-10	seq.2773.50	OID20431	2	-0.0113772	0.0352916	N	N	-0.00444303	-0.094167	0.0132875	0.00192083	1.92074	0.589019	N	N	0.10603	0.0344629	0.0265832	-0.0108094	1.89442	0.594608	0.04	0.191	-0.01	-0.05	seq.2773.50	OID20431	-0.0642296	-0.00200053
Q14005	IL-16	Interleukin-16	seq.2774.10	OID20633	1	0.560564	0.701544	Y	N	0.560309	0.599394	0.637236	0.510521	9.12565	0.0276662	N	N	0.732508	0.676582	0.706695	0.698853	2.98119	0.394535	0.576	0.883	0.4	0.72	seq.2774.10	OID20633	0.549431	0.737923
Q96PD4	IL-17F	Interleukin-17F	seq.2775.54	OID20456	1	0.0140821	0.0333728	N	N	0.0309752	0.039473	0.00320091	-0.00326895	0.566444	0.904069	N	N	-0.0260355	0.0158875	0.0868089	0.067196	2.76972	0.428508	NA	NA	0.04	NA	seq.14026.24	OID20456	-0.000408716	0.0422936
Q9GZX6	IL-22	Interleukin-22	seq.2778.10	OID31407	1	0.458876	0.414006	Y	N	0.375739	0.472032	0.370927	0.509895	11.7348	0.00834901	N	N	0.358862	0.45357	0.338675	0.406366	6.67651	0.0829553	NA	NA	NA	NA	seq.2778.10	OID31407	0.581146	0.487926
P80075	MCP-2	C-C motif chemokine 8	seq.2785.15	OID21466	2	0.0760282	0.291169	Y	N	0.105867	0.158564	0.186414	-0.00413349	11.4159	0.00967718	Y	N	0.345313	0.23019	0.405005	0.246598	12.8746	0.0049158	NA	NA	0.39	0.79	seq.13748.4	OID21466	0.745003	0.811827
P08254	MMP-3	Stromelysin-1	seq.2788.55	OID21083	1	-0.0462035	-0.00707723	Y	N	-0.119673	-0.18107	0.0702578	-0.0251733	10.7249	0.0133101	Y	N	0.0795678	0.0287775	-0.090804	-0.164029	11.9413	0.00758687	0.027	0.072	0.04	-0.13	seq.2788.55	OID21083	-0.0566941	0.0498094
P09237	MMP-7	Matrilysin	seq.2789.26	OID20087	1	0.377802	0.394316	N	N	0.332026	0.370992	0.384866	0.353693	0.703009	0.872496	N	N	0.390633	0.364871	0.355549	0.406432	0.725984	0.867076	0.626	0.79	0.64	0.7	seq.2789.26	OID20087	0.741875	0.749459
P02775	NAP-2	Neutrophil-activating peptide 2	seq.2790.54	OID30761	2	0.869725	0.871474	N	N	0.884069	0.863078	0.872068	0.857381	3.82704	0.280757	N	N	0.871451	0.860801	0.885227	0.861927	3.35796	0.339657	NA	NA	NA, NA	NA	seq.16765.52, seq.17165.1, seq.2790.54, seq.4544.4	OID30761, OID30761, OID30761, OID30761	0.755199495, 0.80013247, 0.812029725, 0.804074289	0.813110824, 0.816176906, 0.826946285, 0.824210866
P00441	SOD	Superoxide dismutase [Cu-Zn]	seq.2794.60	OID20386	1	0.207461	0.388873	N	N	0.248918	0.193674	0.185299	0.194524	1.19177	0.754979	N	N	0.402279	0.393708	0.380324	0.338323	0.88404	0.829278	0.494	0.539	0.26	NA	seq.2794.60	OID20386	0.604943	0.662347
P04114	Apo B	Apolipoprotein B	seq.2797.56	OID30673	1	0.0572868	0.0855068	N	N	0.0914702	0.142214	-0.0784677	0.0814149	7.59831	0.0550854	N	N	-0.055554	0.111722	0.128943	0.152586	7.79786	0.0503794	NA	NA	NA	NA	seq.2797.56	OID30673	0.297971	0.403932
Q9BYF1	ACE2	Angiotensin-converting enzyme 2	seq.2805.6	OID20105	1	-0.000589701	0.0626439	N	N	-0.00544474	-0.0169511	0.0480952	-0.0195053	1.00117	0.800969	N	N	0.13939	0.0778374	-0.00359048	-0.0665891	7.32405	0.0622559	0.057	0.155	-0.03	-0.03	seq.2805.6	OID20105	0.0192328	0.119794
O75173	ADAMTS-4	A disintegrin and metalloproteinase with thrombospondin motifs 4	seq.2809.25	OID30471	1	-0.00968317	0.110208	N	N	0.0301124	0.0396021	-0.0990795	-0.0244424	3.60353	0.30758	N	N	0.0262576	0.104992	0.181758	0.18201	5.31293	0.150265	NA	NA	NA	NA	seq.2809.25	OID30471	0.242583	0.418283
Q15389	Angiopoietin-1	Angiopoietin-1	seq.2811.27	OID20740	1	0.709914	0.760428	Y	N	0.769101	0.638347	0.696897	0.6888	13.0427	0.00454516	N	N	0.752002	0.756324	0.787377	0.690492	6.99147	0.07217	0.703	0.841	0.49	0.86	seq.2811.27	OID20740	0.767591	0.805824
O00253	ART	Agouti-related protein	seq.2813.11	OID20658	1	0.467239	0.550856	Y	N	0.420733	0.43755	0.593912	0.380343	17.1004	0.000673918	Y	N	0.651846	0.494533	0.514772	0.475563	13.0939	0.00443786	0.514	0.697	0.54	0.64	seq.2813.11	OID20658	0.355146	0.538492
P50895	BCAM	Basal Cell Adhesion Molecule	seq.2816.50	OID21076	1	0.505618	0.552827	N	N	0.561776	0.441907	0.494555	0.486109	4.83466	0.184312	N	N	0.546315	0.530074	0.615081	0.520897	5.3544	0.147611	0.551	0.5	0.58	NA	seq.2816.50	OID21076	0.384383	0.451139
P33151	Cadherin-5	Cadherin-5	seq.2819.23	OID20243	1	0.670424	0.732536	Y	N	0.703917	0.670336	0.758375	0.622637	17.0482	0.000690796	Y	N	0.790835	0.69438	0.78292	0.676305	19.9578	0.000173194	0.725	0.777	0.72	0.7	seq.2819.23	OID20243	0.535824	0.531186
P48960	CD97	CD97 antigen	seq.2822.56	OID20260	2	-0.0378806	0.00559984	Y	N	-0.121325	-0.152068	0.0810435	0.0135322	12.3065	0.00640361	Y	N	0.0934671	0.0527353	-0.0689818	-0.0817766	8.25992	0.0409346	NA	NA	-0.09	NA	seq.18881.7	OID20260	0.563952	0.571405
P78423	Fractalkine/CX3CL-1	Fractalkine	seq.2827.23	OID20976	1	0.264753	0.214602	N	N	0.229836	0.229707	0.208428	0.244965	0.337733	0.952783	N	N	0.130025	0.174212	0.222321	0.217249	1.90554	0.592242	0.172	0.135	0.55	0.34	seq.2827.23	OID20976	0.317377	0.22202
O43278	HAI-1	Kunitz-type protease inhibitor 1	seq.2828.82	OID21109	1	0.425002	0.4819	N	N	0.412534	0.486981	0.395821	0.4241	1.83644	0.607038	N	N	0.460565	0.472481	0.454027	0.555356	3.13881	0.370714	0.428	0.44	0.39	NA	seq.2828.82	OID21109	0.335441	0.374822
Q9UBX7	Kallikrein 11	Kallikrein-11	seq.2831.29	OID21518	1	0.364536	0.378673	Y	N	0.451386	0.281742	0.426207	0.330911	9.49436	0.0233915	Y	N	0.421849	0.356572	0.505397	0.283258	14.2084	0.00263479	0.51	0.566	0.54	NA	seq.2831.29	OID21518	0.468001	0.497831
Q9Y5K2	Kallikrein 4	Kallikrein-4	seq.2833.20	OID21391	1	0.0387059	0.0302874	N	N	-0.0232873	0.110158	0.105819	0.0360724	4.09417	0.251474	N	N	0.0129125	0.0555924	0.0135124	0.0747523	1.00668	0.799635	NA	NA	0.02	NA	seq.2833.20	OID21391	-0.0169005	0.0327859
O60259	kallikrein 8	Kallikrein-8	seq.2834.54	OID21517	2	0.717137	0.70956	Y	N	0.772131	0.668377	0.670794	0.718246	10.846	0.0125885	Y	Y	0.666218	0.691679	0.799164	0.635523	26.4242	7.77285e-06	0.691	0.759	0.74	NA	seq.2834.54	OID21517	0.67489	0.708757
P80188	Lipocalin 2	Neutrophil gelatinase-associated lipocalin	seq.2836.68	OID20392	1	0.689207	0.693315	N	N	0.668732	0.654825	0.60727	0.670676	2.60069	0.457369	N	N	0.600874	0.69003	0.680911	0.623083	6.63925	0.0843295	0.508	0.546	0.8	NA	seq.2836.68	OID20392	0.685953	0.686026
P08581	Met	Hepatocyte growth factor receptor	seq.2837.3	OID20269	1	0.583338	0.63004	Y	N	0.505457	0.658844	0.651284	0.601832	12.1894	0.00676176	N	N	0.692826	0.638845	0.598392	0.643573	4.47594	0.214446	0.509	0.552	0.61	0.5	seq.2837.3	OID20269	0.510325	0.482399
Q92765	sFRP-3	Secreted frizzled-related protein 3	seq.2841.13	OID20968	2	0.182849	0.170489	N	N	0.171267	0.0765334	0.264558	0.231542	6.27661	0.0989011	N	N	0.247874	0.208252	0.201375	0.0843742	3.93929	0.268095	NA	NA	0.56	NA	seq.13740.51	OID20968	0.612517	0.595388
O43291	SPINT2	Kunitz-type protease inhibitor 2	seq.2843.13	OID20720	1	0.240681	0.340553	N	N	0.29997	0.147197	0.335639	0.243631	6.16117	0.104027	Y	N	0.419466	0.348323	0.426531	0.210115	10.3147	0.016072	0.45	0.59	0.37	NA	seq.2843.13	OID20720	0.402935	0.545513
P35590	sTie-1	Tyrosine-protein kinase receptor Tie-1, soluble	seq.2844.53	OID20303	1	0.610416	0.656216	Y	Y	0.694989	0.652736	0.673473	0.520702	30.1196	1.3024e-06	Y	Y	0.682739	0.568369	0.761684	0.649301	38.8385	1.87792e-08	0.702	0.738	0.69	0.66	seq.2844.53	OID20303	0.484511	0.515551
Q9Y5W5	WIF-1	Wnt inhibitory factor 1	seq.2848.2	OID21464	2	0.196193	0.18514	N	N	0.145645	0.175057	0.205098	0.154608	0.762146	0.858498	N	N	0.185523	0.158463	0.139747	0.16363	0.379117	0.944522	NA	NA	0.73	NA	seq.16070.7	OID21464	0.389567	0.346929
P55008	AIF1	Allograft inflammatory factor 1	seq.2849.49	OID21234	1	0.264218	0.273449	N	N	0.280701	0.24283	0.214578	0.278906	1.24823	0.741462	N	N	0.223979	0.301849	0.281773	0.240557	1.92003	0.58917	NA	NA	0.24	NA	seq.2849.49	OID21234	0.492661	0.571642
P01031	C5a	C5a anaphylatoxin	seq.2851.63	OID30744	2	0.258438	0.335232	N	N	0.212247	0.289745	0.205499	0.279334	2.60457	0.456689	N	N	0.277888	0.35598	0.337596	0.281685	2.38938	0.495615	NA	NA	NA, NA, NA	NA	seq.4482.66, seq.2381.52, seq.2851.63	OID30744, OID30744, OID30744	0.349629732, 0.331827407, 0.281114251	0.390101832, 0.397098037, 0.363400771
Q9BY41	HDAC8	Histone deacetylase 8	seq.2859.69	OID30436	1	-0.00939001	-0.0121913	N	N	-0.00342997	0.00736914	0.0284723	-0.0129807	0.388243	0.94266	N	N	-0.0358785	-0.00552832	0.00887065	0.0452447	0.882945	0.829542	NA	NA	NA	NA	seq.2859.69	OID30436	0.02297	0.0200511
Q02750	MEK1	Dual specificity mitogen-activated protein kinase kinase 1	seq.2864.2	OID31468	1	0.57782	0.662905	Y	N	0.601771	0.416323	0.633324	0.561904	13.3306	0.00397348	Y	N	0.701818	0.652638	0.678193	0.534416	10.8648	0.0124799	NA	NA	NA	NA	seq.2864.2	OID31468	0.497606	0.708454
Q06609	RAD51	DNA repair protein RAD51 homolog 1	seq.2871.73	OID31254	1	0.00137341	0.0248245	N	N	0.00276222	-0.0274325	0.0673123	-0.0190834	1.75064	0.625734	N	N	0.0774915	0.0116087	0.0176158	-0.00842965	1.16312	0.761863	NA	NA	NA	NA	seq.2871.73	OID31254	-0.0411347	0.0341331
P11387	Topoisomerase I	DNA topoisomerase 1	seq.2876.74	OID31449	1	-0.0260947	-0.013723	N	N	-0.0191619	-0.0412777	-0.0895814	-0.0092644	1.44908	0.694073	N	N	-0.0791508	0.0147518	0.000251587	-0.0853241	3.19735	0.362187	NA	NA	NA	NA	seq.2876.74	OID31449	0.00237926	-0.0273814
P07947	YES	Tyrosine-protein kinase Yes	seq.2878.66	OID21348	1	0.249725	0.398948	N	N	0.234068	0.244952	0.384328	0.267757	5.26563	0.153348	N	N	0.494915	0.415205	0.400268	0.380663	3.24288	0.355672	0.489	0.599	0.29	0.16	seq.2878.66	OID21348	0.403544	0.447631
P01011	a1-Antichymotrypsin	Alpha-1-antichymotrypsin	seq.2879.9	OID30786	1	-0.0546295	0.135741	N	N	-0.106492	0.0455652	0.0341886	-0.0759535	6.06517	0.108482	N	N	0.2193	0.100625	0.141267	0.146942	3.26203	0.352963	NA	NA	NA, NA	NA	seq.2879.9, seq.4153.11	OID30786, OID30786	-0.045498106, 0.42582869	0.279183556, 0.462432386
P10643	C7	Complement component C7	seq.2888.49	OID30766	2	0.381993	0.510387	Y	N	0.295573	0.50374	0.373223	0.355273	9.50787	0.0232478	Y	N	0.459596	0.475753	0.457352	0.614778	8.93193	0.0302097	NA	NA	NA	NA	seq.2888.49	OID30766	0.401021	0.55602
Q16619	Cardiotrophin-1	Cardiotrophin-1	seq.2889.37	OID20061	2	-0.0385292	0.19303	N	N	0.00599877	0.030839	-0.0708546	-0.0144125	1.51791	0.678144	N	N	0.171143	0.208882	0.235165	0.273994	1.68847	0.639501	0.536	0.583	0.19	NA	seq.2889.37	OID20061	0.608261	0.62341
Q9NRJ3	CCL28	C-C motif chemokine 28	seq.2890.59	OID20569	1	0.546871	0.526243	N	N	0.539979	0.531149	0.575686	0.508664	2.0684	0.558332	N	N	0.585774	0.473792	0.51803	0.533819	5.65337	0.129748	0.574	0.592	0.69	0.43	seq.2890.59	OID20569	0.711971	0.735685
P20273	CD22	B-cell receptor CD22	seq.2891.1	OID20637	1	0.0591855	0.132373	N	N	0.0411886	0.0296688	-0.0534355	0.0140675	1.62204	0.654403	N	N	0.0708949	0.0757181	0.111235	0.167549	1.87532	0.598684	NA	NA	0.05	NA	NA	NA	NA	NA
Q16627	HCC-1	C-C motif chemokine 14	seq.2900.53	OID20401	1	0.701534	0.709151	N	N	0.687483	0.672561	0.748697	0.685259	4.27899	0.232871	N	N	0.737579	0.700184	0.710805	0.64954	3.77359	0.286973	0.594	0.609	0.74	0.79	seq.2900.53	OID20401	0.640352	0.638262
P05112	IL-4	Interleukin-4	seq.2906.55	OID20426	1	0.00513472	0.0599281	N	N	-0.000417008	0.103871	-0.0529606	-0.000784543	3.21139	0.360167	N	N	0.0344701	0.0690175	0.0338672	0.127941	1.61018	0.657084	-0.06	-0.016	0.02	-0.13	seq.2906.55	OID20426	-0.00332922	-0.00533579
P21741	Midkine	Midkine	seq.2911.27	OID21489	1	0.320325	0.377979	N	N	0.290398	0.314353	0.383773	0.359331	2.65309	0.448258	N	N	0.452071	0.402257	0.401465	0.364218	1.45215	0.693357	0.625	0.682	0.39	NA	seq.2911.27	OID21489	0.613542	0.617607
P55773	MPIF-1	C-C motif chemokine 23	seq.2913.1	OID20693	1	0.780566	0.819088	N	N	0.746916	0.741715	0.741683	0.73537	0.207523	0.976366	N	N	0.803092	0.787933	0.777072	0.773308	1.08202	0.781417	0.814	0.831	0.72, 0.71	0.85, 0.76	seq.2913.1, seq.3028.36	OID20693, OID20693	0.638736968, 0.517571996	0.689831488, 0.695549394
P12004	PCNA	Proliferating cell nuclear antigen	seq.2915.6	OID31161	2	-0.0477242	-0.0169159	N	N	-0.00307265	-0.161892	-0.0219144	-0.0434669	4.10645	0.250196	N	N	0.00758068	-0.0191953	0.0389647	-0.0804737	2.34689	0.503597	NA	NA	NA	NA	seq.19364.163	OID31161	0.047816	0.0357157
O14788	sRANKL	Tumor necrosis factor ligand superfamily member 11	seq.2917.3	OID20592	1	0.0837976	0.096176	N	N	0.0790006	-0.0263035	0.0660138	0.0407699	1.80688	0.61344	N	N	0.068226	0.0658028	0.0953332	0.00558881	1.21615	0.749134	NA	NA	-0.04	0.04	seq.14061.48	OID20592	0.0244365	0.0188514
P05121	PAI-1	Plasminogen activator inhibitor 1	seq.2925.9	OID20342	1	0.829494	0.839568	Y	N	0.840736	0.738224	0.835861	0.831663	13.5251	0.0036283	Y	N	0.853367	0.843323	0.840994	0.749387	14.4041	0.0024037	0.805	0.867	0.79	0.88	seq.2925.9	OID20342	0.765803	0.791587
P02649	Apo E3	Apolipoprotein E (isoform E3)	seq.2937.10	OID30727	1	0.355572	0.358749	N	N	0.299903	0.465363	0.386482	0.385577	6.07714	0.107917	N	N	0.406414	0.363814	0.334685	0.476326	4.94657	0.175752	NA	NA	NA, NA, NA, NA	NA	seq.2418.55	OID30727	0.259477	0.2512
P02649	Apo E4	Apolipoprotein E (isoform E4)	seq.2938.55	OID30727	4	0.322226	0.316486	Y	N	0.223882	0.446952	0.378175	0.371473	12.1641	0.00684168	Y	N	0.386428	0.335986	0.25297	0.445875	8.36514	0.0390383	NA	NA	NA, NA, NA, NA	NA	seq.2418.55	OID30727	0.259477	0.2512
Q5T4W7	Artemin	Artemin	seq.2939.10	OID20446	1	-0.0157859	0.0227609	N	N	0.0130534	0.0157236	-0.040819	-0.027237	0.881414	0.82991	N	N	-0.00758411	0.00623196	0.0568622	0.0620568	1.37037	0.712494	-0.021	0.063	-0.06	-0.03	seq.2939.10	OID20446	-0.0113757	0.0515122
P41271	DAN	Neuroblastoma suppressor of tumorigenicity 1	seq.2944.66	OID21486	1	0.438173	0.444803	N	N	0.420831	0.431454	0.486859	0.420023	1.60815	0.657544	N	N	0.436431	0.451564	0.486271	0.428813	1.10991	0.774683	0.019	0.213	0.59	NA	seq.2944.66	OID21486	0.546306	0.510284
P00746	Factor D	Complement factor D	seq.2946.52	OID30738	1	0.483692	0.578011	N	N	0.461285	0.435812	0.498126	0.473875	0.869118	0.832873	N	N	0.548432	0.585749	0.58356	0.485474	4.10565	0.250279	NA	NA	NA	NA	seq.2946.52	OID30738	0.548083	0.58275
P10912	Growth hormone receptor	Growth hormone receptor	seq.2948.58	OID30574	1	0.756761	0.766804	Y	Y	0.709801	0.666978	0.853816	0.769558	34.563	1.50679e-07	Y	Y	0.860104	0.774564	0.728849	0.679265	32.9162	3.35452e-07	NA	NA	NA	NA	seq.2948.58	OID30574	0.780343	0.777072
O15496	GX	Group 10 secretory phospholipase A2	seq.2949.6	OID21002	1	0.0404261	0.0442349	N	N	0.0573234	-0.0392005	0.00467781	0.0574388	2.18366	0.535173	N	N	-0.0628956	0.0500002	0.0786854	-0.011783	4.1695	0.243733	0.102	0.045	0.35	NA	seq.2949.6	OID21002	0.0584262	-0.0246734
P22692	IGFBP-4	Insulin-like growth factor-binding protein 4	seq.2950.57	OID21158	1	0.436052	0.453082	Y	N	0.528932	0.258978	0.406071	0.415065	16.3345	0.000968251	Y	N	0.434667	0.437035	0.536244	0.28643	14.1568	0.00269935	NA	NA	0.28	NA	seq.2950.57	OID21158	0.314487	0.359404
P22894	MMP-8	Neutrophil collagenase	seq.2954.56	OID21019	2	-0.0543937	0.110413	N	N	-0.120406	-0.0222956	-0.0858942	-0.0710949	1.57242	0.665659	N	N	0.0591864	0.131511	0.0294029	0.0905104	3.51978	0.318205	NA	NA	0.38	NA	seq.9172.69	OID21019	0.39727	0.497533
P27918	Properdin	Properdin	seq.2960.66	OID30784	1	0.572242	0.609775	N	N	0.581838	0.564641	0.453828	0.579288	6.85474	0.0766748	N	N	0.523164	0.615651	0.607295	0.585012	4.18844	0.241821	NA	NA	NA	NA	seq.2960.66	OID30784	0.462876	0.49598
P04070	Protein C	Vitamin K-dependent protein C	seq.2961.1	OID20402	2	0.260609	0.467254	N	N	0.307729	0.206281	0.328132	0.220137	5.06529	0.167079	Y	N	0.503776	0.481284	0.477463	0.311354	8.74875	0.0328248	0.342	0.515	0.69, -0.01	0.41, -0.08	seq.2961.1, seq.3758.68	OID20402, OID20402	0.220573798, -0.045681833	0.41944158, 0.05270619
Q9Y240	SCGF-beta	Stem cell growth factor-beta	seq.2966.65	OID21112	1	0.782892	0.790836	Y	N	0.783531	0.768897	0.829379	0.756222	8.61922	0.0348063	N	N	0.821941	0.762607	0.794532	0.791484	6.21866	0.101443	0.73	0.734	0.84, 0.82	NA	seq.2966.65, seq.4500.50	OID21112, OID21112	0.63395785, 0.640411605	0.64841443, 0.666330039
P19320	VCAM-1	Vascular cell adhesion protein 1	seq.2967.8	OID20396	2	0.656531	0.671195	N	N	0.63945	0.6538	0.554308	0.655318	5.64539	0.130197	N	N	0.554484	0.667224	0.67192	0.650391	7.72062	0.0521527	0.645	0.649	0.68	0.68	seq.2967.8	OID20396	0.511222	0.487963
P37023	ALK-1	Serine/threonine-protein kinase receptor R3	seq.2969.11	OID20999	2	0.0337839	0.0796242	N	N	0.00526306	0.0150758	0.00252769	-0.00962613	0.148826	0.985394	N	N	0.0377242	0.0662388	0.0815516	0.0593413	0.33443	0.953428	NA	NA	0.05	NA	seq.16318.12	OID20999	0.331599	0.436457
P15514	AREG	Amphiregulin	seq.2970.60	OID21357	1	-0.047162	-0.0240632	N	N	0.0128547	-0.0921224	-0.108897	-0.0609837	3.16916	0.366272	N	N	-0.0821822	-0.0292405	0.0226189	-0.0563323	2.11237	0.549414	0.071	0.053	-0.04	NA	seq.2970.60	OID21357	-0.0654244	-0.0264845
P16671	CD36 ANTIGEN	Platelet glycoprotein 4	seq.2973.15	OID30485	1	0.486166	0.538626	Y	Y	0.60304	0.473517	0.59263	0.384185	33.2696	2.82534e-07	Y	Y	0.631009	0.459511	0.642898	0.509842	27.5044	4.61464e-06	NA	NA	NA	NA	seq.2973.15	OID30485	0.367629	0.547567
Q12860	contactin-1	Contactin-1	seq.2974.61	OID20307	1	0.648373	0.742959	N	N	0.649116	0.673082	0.671716	0.64614	0.743698	0.862881	N	N	0.753847	0.738428	0.770277	0.703426	3.59493	0.308657	0.673	0.749	0.75	0.64	seq.2974.61	OID20307	0.521724	0.570899
P29279	CTGF	Connective tissue growth factor	seq.2975.19	OID20709	1	0.281019	0.426228	N	N	0.339514	0.268378	0.288036	0.27123	1.83245	0.607899	N	N	0.444467	0.432148	0.45258	0.405433	0.55145	0.907451	NA	NA	0.15	NA	seq.2975.19	OID20709	0.502849	0.608628
Q9UNE0	EDAR	Tumor necrosis factor receptor superfamily member EDAR	seq.2977.7	OID20525	1	0.780169	0.769522	Y	Y	0.827684	0.708371	0.820922	0.736964	26.2457	8.47177e-06	Y	N	0.825436	0.734551	0.801206	0.697543	20.6357	0.0001253	0.901	0.905	0.75	NA	seq.2977.7	OID20525	0.798399	0.766723
P42830	ENA-78	C-X-C motif chemokine 5	seq.2979.8	OID20207	1	0.0822141	0.343958	Y	N	0.215325	0.0912801	0.131953	0.00593759	14.2835	0.00254358	N	N	0.386877	0.305283	0.420505	0.286862	6.84776	0.0769118	0.753	0.692	0.2	0.17	seq.2979.8	OID20207	0.478123	0.496533
Q96AP7	ESAM	Endothelial cell-selective adhesion molecule	seq.2981.9	OID20270	1	0.639313	0.654962	N	N	0.651569	0.581116	0.590475	0.589768	3.55597	0.313576	N	N	0.61046	0.626877	0.677295	0.555626	6.28652	0.0984726	NA	NA	0.69	NA	seq.7841.84	OID20270	0.348823	0.518656
P56470	Galectin-4	Galectin-4	seq.2982.82	OID20748	1	0.295443	0.292395	Y	N	0.277488	0.392591	0.104665	0.321129	14.5288	0.00226694	Y	N	0.115302	0.312969	0.269202	0.352734	10.8675	0.0124642	0.075	0.062	0.29	0.45	seq.2982.82	OID20748	0.0658633	0.06821
P09341	Gro-a	Growth-regulated alpha protein	seq.2985.35	OID20762	1	0.772357	0.77095	Y	Y	0.834419	0.741105	0.831061	0.717941	36.3403	6.34502e-08	Y	Y	0.846423	0.712339	0.831814	0.741807	43.2058	2.2254e-09	0.638	0.678	0.73	0.73, 0.71	seq.2985.35	OID20762	0.783236	0.769924
P19876	Gro-g	Gro-gamma	seq.2986.49	OID20788	2	0.740966	0.759419	Y	Y	0.790819	0.712525	0.842826	0.6846	40.7488	7.39251e-09	Y	Y	0.85465	0.710913	0.799799	0.724313	37.7316	3.2216e-08	NA	NA	0.58	NA	seq.3148.49	OID20788	0.737105	0.763121
P01579	IFN-g	Interferon gamma	seq.2989.17	OID20495	2	-0.0408154	0.00111841	N	N	-0.0705085	0.00779797	-0.139708	-0.0415615	3.17684	0.365156	N	N	-0.0925332	0.00569693	-0.0249965	0.0504975	3.04256	0.38511	NA	NA	0.06	0	seq.15346.31	OID20495	0.0466947	0.0640805
P14778	IL-1 sRI	Interleukin-1 receptor type 1	seq.2991.9	OID21116	1	0.552813	0.68438	N	N	0.556538	0.493182	0.574635	0.551085	1.78533	0.618132	N	N	0.675881	0.691101	0.699019	0.601769	5.04049	0.168856	0.4	0.595	0.63	0.56	seq.2991.9	OID21116	0.386711	0.527623
Q96F46	IL-17 sR	Interleukin-17 receptor A	seq.2992.59	OID21089	1	0.810894	0.851461	Y	Y	0.870471	0.813485	0.567403	0.78293	81.7243	1.30959e-17	Y	Y	0.621799	0.838035	0.890926	0.850673	84.3811	3.5237e-18	0.586	0.8	0.9	0.84	seq.2992.59	OID21089	0.627738	0.722449
O95256	IL-18 Rb	Interleukin-18 receptor accessory protein	seq.2993.1	OID20900	1	-0.00498347	0.000160436	N	N	-0.0233515	0.0634894	0.101779	-0.0247583	4.54709	0.208128	N	N	0.0667148	-0.00219357	-0.0218459	0.066651	2.19467	0.533	NA	NA	-0.03	NA	seq.2993.1	OID20900	0.0190317	0.0308347
Q9HB29	IL-1Rrp2	Interleukin-1 receptor-like 2	seq.2994.71	OID20487	1	0.561291	0.399813	Y	N	0.603997	0.467934	0.464115	0.599676	13.2892	0.00405109	Y	N	0.29627	0.442864	0.450151	0.305152	10.5111	0.014686	0.502	0.326	0.72	0.72	seq.2994.71	OID20487	0.49754	0.246544
[truncated: 1,220 more rows]

## Sheet: ST3.MESA_soma7k_cispQTL_Main
Supplemental Table 3. SomaScan cis-pQTL Credible Sets For Main Analysis SeqIDs
[truncated: 10,321 more rows]
[truncated: 79 more columns]

[truncated: 30 more sheets: ST4.MESA_olink3k_cispQTL_Main, ST5.MESA_Platform_Disc_PAV, ST6.Corr_by_cispQTL_Status, ST7.cispQTL_Signal_Characterize, ST8.Mesa_Soma7k_transpQTL_Main, ST9.Mesa_Olink3k_transpQTL_Main, ST10.Corr_by_transpQTL_Status, ST11.Pleiotropic_Regions_Summar, ST12.Pleiotropic_Region_Key, ST13.LOD Summary_One_Probe, ST14.Corr_By_%_LOD, ST15.LOD_Values, ST16.Epi_Associations_One_Probe, ST17.Epi_results_per_probe, ST18.Soma_PAV_adjusted_pQTL, ST19.Olink_PAV_adjusted_pQTL, ST20.Soma_pQTL_inc_sig_post_adj, ST21.Ol_pQTL_inc_sig_post_adj, ST22.Newly_sig_pQTL_post_adj, ST23.Soma_Specific_cis_PAV_ALL …]
